# Supplementary material
Source: PubMed Central journal article supplement (PMC4018243)
Supplement: NIHMS579676-supplement-Supp_Figure_1.pdf [file NIHMS579676-supplement-Supp_Figure_1.pdf]

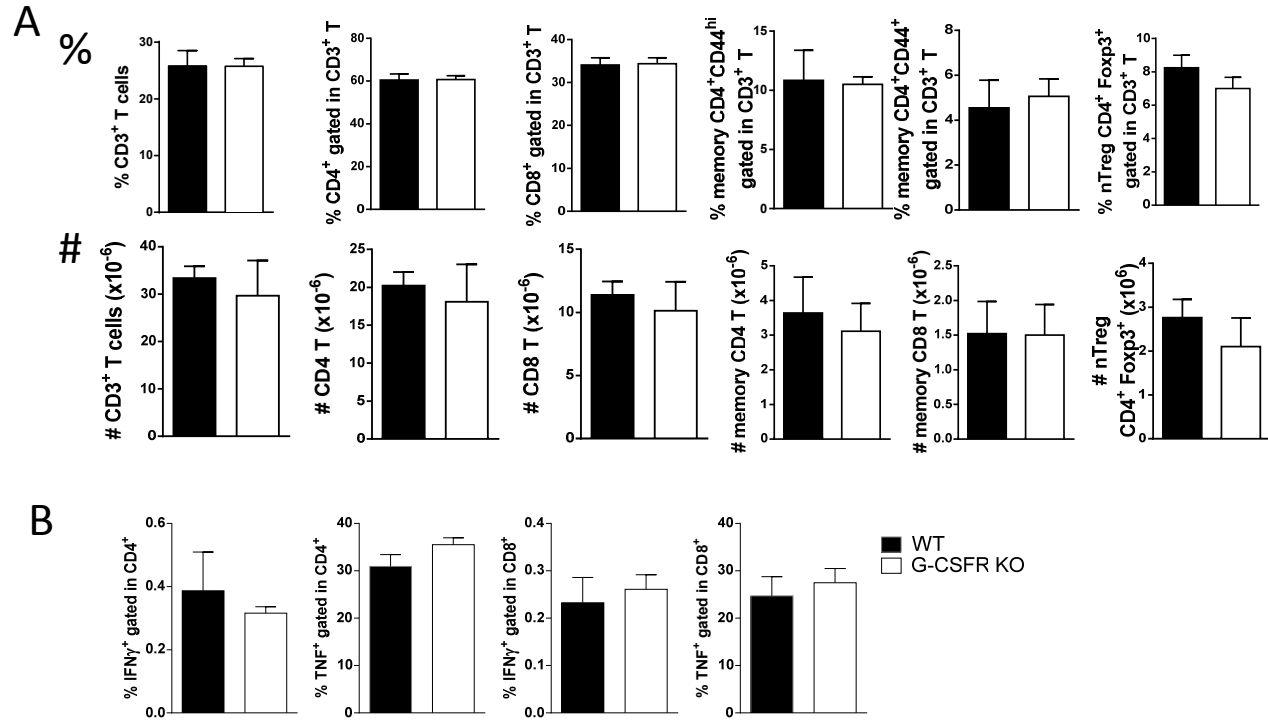

Supplementary Figure 1

Comparison of the splenic T cell compartments of naive WT and G-CSFR<sup>-/-</sup>. (A) FACS analysis of splenic T cells from naive WT and G-CSFR<sup>-/-</sup> mice (n=4 per group). (B) Splenocytes were cultured for 6 hours with CD3 mAb (2C11, 2 $\mu$ g/ml) and intracellular cytokine staining was performed to examine CD4 and CD8 T cell cytokine expression.
