# Supplementary material
Source: PubMed Central journal article supplement (PMC4018243)
Supplement: NIHMS579676-supplement-Supp_Table_1.pdf [file NIHMS579676-supplement-Supp_Table_1.pdf]

Supplementary Table 1  
G-CSF regulated gene expression in nTreg

| <i>ProbeID</i> | <i>p-value</i> | <i>regulation</i> | <i>Fold change</i> | <i>Symbol</i> | <i>Entrez_Gene_ID</i> | <i>Definition</i>                                                                                                           |
|----------------|----------------|-------------------|--------------------|---------------|-----------------------|-----------------------------------------------------------------------------------------------------------------------------|
| 1070703        | 0.020921338    | up                | 2.7736557          | Akna          | 100182                | Mus musculus AT-hook transcription factor (Akna), mRNA.                                                                     |
| 4150575        | 0.04330814     | up                | 2.4548984          | Bcl9l         |                       |                                                                                                                             |
| 7380452        | 0.04330814     | up                | 2.2533514          | Fmnl1         | 57778                 | Mus musculus formin-like 1 (Fmnl1), transcript variant 1, mRNA.                                                             |
| 360356         | 0.04330814     | up                | 2.2245193          | Scaf1         | 233208                | Mus musculus SR-related CTD-associated factor 1 (Scaf1), mRNA.                                                              |
| 6370253        | 0.020921338    | up                | 2.2032511          | Pou2f2        | 18987                 | Mus musculus POU domain, class 2, transcription factor 2 (Pou2f2), mRNA.                                                    |
| 1660504        | 0.020921338    | up                | 2.163063           | Il7r          | 16197                 | Mus musculus interleukin 7 receptor (Il7r), mRNA.                                                                           |
| 7550441        | 0.020921338    | up                | 2.1606941          | Ihpk2         | 76500                 | Mus musculus inositol hexaphosphate kinase 2 (Ihpk2), mRNA.                                                                 |
| 4070358        | 0.04330814     | up                | 2.0418308          | Ihpk2         | 76500                 | Mus musculus inositol hexaphosphate kinase 2 (Ihpk2), mRNA.                                                                 |
| 2030632        | 0.020921338    | up                | 1.9939442          | Stk40         | 74178                 | Mus musculus serine/threonine kinase 40 (Stk40), mRNA.                                                                      |
| 1500056        | 0.04330814     | up                | 1.9873164          | Wbp7          | 75410                 | Mus musculus WW domain binding protein 7 (Wbp7), mRNA.                                                                      |
| 6290376        | 0.04330814     | up                | 1.9867165          | E2f4          | 104394                | Mus musculus E2F transcription factor 4 (E2f4), mRNA.                                                                       |
| 290041         | 0.020921338    | up                | 1.9767503          | Nfic          | 18029                 | Mus musculus nuclear factor I/C (Nfic), transcript variant 2, mRNA.                                                         |
| 1660523        | 0.04330814     | up                | 1.9752914          | Mark2         | 13728                 | Mus musculus MAP/microtubule affinity-regulating kinase 2 (Mark2), transcript variant 1, mRNA.                              |
| 3290437        | 0.020921338    | up                | 1.9738663          | Mcm6          | 17219                 | Mus musculus minichromosome maintenance deficient 6 (MISS homolog, <i>S. pombe</i> ) ( <i>S. cerevisiae</i> ) (Mcm6), mRNA. |
| 830598         | 0.020921338    | up                | 1.9609385          | Cbx7          | 52609                 | Mus musculus chromobox homolog 7 (Cbx7), mRNA.                                                                              |
| 1430445        | 0.020921338    | up                | 1.9454347          | Ppp1r10       | 52040                 | Mus musculus protein phosphatase 1, regulatory subunit 10 (Ppp1r10), mRNA.                                                  |
| 5670280        | 0.020921338    | up                | 1.9449235          | Zscan2        | 22691                 | Mus musculus zinc finger and SCAN domain containing 2 (Zscan2), mRNA.                                                       |
| 50091          | 0.020921338    | up                | 1.9310259          | Cxcr5         | 12145                 | Mus musculus chemokine (C-X-C motif) receptor 5 (Cxcr5), mRNA.                                                              |
| 5890653        | 0.04330814     | up                | 1.9298224          | Sostdc1       | 66042                 | Mus musculus sclerostin domain containing 1 (Sostdc1), mRNA.                                                                |
| 130681         | 0.04330814     | up                | 1.9243388          | Tmc8          | 217356                | Mus musculus transmembrane channel-like gene family 8 (Tmc8), mRNA.                                                         |
| 5900593        | 0.020921338    | up                | 1.9234283          | Ptpn22        | 19260                 | Mus musculus protein tyrosine phosphatase, non-receptor type 22 (lymphoid) (Ptpn22), mRNA.                                  |
| 3140246        | 0.020921338    | up                | 1.8873158          | Pglyrp1       |                       |                                                                                                                             |
| 2810246        | 0.04330814     | up                | 1.8843414          | Cnot3         | 232791                | Mus musculus CCR4-NOT transcription complex, subunit 3 (Cnot3), mRNA.                                                       |
| 1440564        | 0.020921338    | up                | 1.8822148          | Hgs           | 15239                 | Mus musculus HGF-regulated tyrosine kinase substrate (Hgs), mRNA.                                                           |
| 1500706        | 0.020921338    | up                | 1.8753183          | Stip1         | 20867                 | Mus musculus stress-induced phosphoprotein 1 (Stip1), mRNA.                                                                 |
| 5720609        | 0.020921338    | up                | 1.8615347          | Lyz           | 17110                 | Mus musculus lysozyme (Lyz), mRNA.                                                                                          |
| 1340349        | 0.04330814     | up                | 1.8581322          | Ssbp3         | 72475                 | Mus musculus single-stranded DNA binding protein 3 (Ssbp3), transcript variant 1, mRNA.                                     |
| 4880670        | 0.020921338    | up                | 1.8536464          | Med15         | 94112                 | Mus musculus mediator complex subunit 15 (Med15), transcript variant 1, mRNA.                                               |
| 1780154        | 0.020921338    | up                | 1.8464185          | Adar          | 56417                 | Mus musculus adenosine deaminase, RNA-specific (Adar), transcript variant 1, mRNA.                                          |
| 5550296        | 0.020921338    | up                | 1.8462778          | Ttyh3         | 78339                 | Mus musculus tweety homolog 3 ( <i>Drosophila</i> ) (Ttyh3), mRNA.                                                          |
| 1470356        | 0.020921338    | up                | 1.8406516          | Ars2          | 83701                 | Mus musculus arsenate resistance protein 2 (Ars2), mRNA.                                                                    |
| 2070615        | 0.04330814     | up                | 1.8290865          | Anxa11        | 11744                 | Mus musculus annexin A11 (Anxa11), mRNA.                                                                                    |
| 3170204        | 0.020921338    | up                | 1.8284597          | Tnip1         | 57783                 | Mus musculus TNFAIP3 interacting protein 1 (Tnip1), mRNA.                                                                   |
| 2060544        | 0.020921338    | up                | 1.8247359          | Chst2         | 54371                 | Mus musculus carbohydrate sulfotransferase 2 (Chst2), mRNA.                                                                 |
| 7570181        | 0.020921338    | up                | 1.8198655          | Clec2d        | 93694                 | Mus musculus C-type lectin domain family 2, member d (Clec2d), mRNA.                                                        |
| 6350201        | 0.020921338    | up                | 1.8086939          | Zhx2          | 387609                | Mus musculus zinc fingers and homeoboxes 2 (Zhx2), mRNA.                                                                    |
| 3460605        | 0.020921338    | up                | 1.8022853          | Spen          | 56381                 | Mus musculus SPEN homolog, transcriptional regulator ( <i>Drosophila</i> ) (Spen), mRNA.                                    |
| 6270475        | 0.04330814     | up                | 1.798107           | Scrib         | 105782                | Mus musculus scribbled homolog ( <i>Drosophila</i> ) (Scrib), mRNA.                                                         |
| 6420181        | 0.020921338    | up                | 1.7972987          | Phrf1         | 101471                | Mus musculus PHD and ring finger domains 1 (Phrf1), mRNA.                                                                   |
| 650609         | 0.04330814     | up                | 1.7935827          | Tpcn1         | 252972                | Mus musculus two pore channel 1 (Tpcn1), mRNA.                                                                              |
| 5220170        | 0.04330814     | up                | 1.7919347          | Mtap7d1       | 245877                | Mus musculus microtubule-associated protein 7 domain containing 1 (Mtap7d1), mRNA.                                          |
| 1440630        | 0.020921338    | up                | 1.7873852          | Axin2         | 12006                 | Mus musculus axin2 (Axin2), mRNA.                                                                                           |
| 2900056        | 0.04330814     | up                | 1.7869257          | Bat2          | 53761                 | Mus musculus HLA-B associated transcript 2 (Bat2), mRNA.                                                                    |
| 2230386        | 0.020921338    | up                | 1.7852939          | ligp2         | 54396                 | Mus musculus interferon inducible GTPase 2 (ligp2), mRNA.                                                                   |
| 7560100        | 0.04330814     | up                | 1.7781487          | Cic           | 71722                 | Mus musculus capicua homolog ( <i>Drosophila</i> ) (Cic), mRNA.                                                             |
| 5570348        | 0.020921338    | up                | 1.7746824          | 4121402D02Rik | 74026                 | Mus musculus RIKEN cDNA 4121402D02 gene (4121402D02Rik), mRNA.                                                              |
| 240487         | 0.020921338    | up                | 1.7739819          | BC017643      | 217370                | Mus musculus cDNA sequence BC017643 (BC017643), mRNA.                                                                       |
| 4150050        | 0.020921338    | up                | 1.7677815          | Pigt          | 78928                 | Mus musculus phosphatidylinositol glycan anchor biosynthesis, class T (Pigt), mRNA. XM_922599                               |
| 4760725        | 0.020921338    | up                | 1.7671133          | Sipa1         | 20469                 | Mus musculus signal-induced proliferation associated gene 1 (Sipa1), mRNA.                                                  |
| 870707         | 0.020921338    | up                | 1.7655845          | Bcl6          | 12053                 | Mus musculus B-cell leukemia/lymphoma 6 (Bcl6), mRNA.                                                                       |
| 6980148        | 0.04330814     | up                | 1.7653356          | Chd4          | 107932                | Mus musculus chromodomain helicase DNA binding protein 4 (Chd4), mRNA.                                                      |
| 5130139        | 0.020921338    | up                | 1.7620659          | Tgfb1         | 21803                 | Mus musculus transforming growth factor, beta 1 (Tgfb1), mRNA.                                                              |
| 1580044        | 0.020921338    | up                | 1.7609446          | Vars          | 22321                 | Mus musculus valyl-tRNA synthetase (Vars), nuclear gene encoding mitochondrial protein, mRNA.                               |
| 6450600        | 0.020921338    | up                | 1.7607063          | Gramd1b       | 235283                | Mus musculus GRAM domain containing 1B (Gramd1b), mRNA.                                                                     |

|         |             |    |           |               |           |                                                                                                                   |
|---------|-------------|----|-----------|---------------|-----------|-------------------------------------------------------------------------------------------------------------------|
| 5050192 | 0.04330814  | up | 1.7576644 | AA536749      |           |                                                                                                                   |
| 3890373 | 0.04330814  | up | 1.7567506 | Cherp         | 27967     | Mus musculus calcium homeostasis endoplasmic reticulum protein (Cherp), mRNA.                                     |
| 7210349 | 0.020921338 | up | 1.7564356 | Apobec3       | 80287     | Mus musculus apolipoprotein B mRNA editing enzyme, catalytic polypeptide 3 (Apobec3), mRNA.                       |
| 2630669 | 0.04330814  | up | 1.7530082 | C2cd3         | 277939    | Mus musculus C2 calcium-dependent domain containing 3 (C2cd3), mRNA.                                              |
| 7320435 | 0.04330814  | up | 1.7490069 | Zmiz2         | 52915     | Mus musculus zinc finger, MIZ-type containing 2 (Zmiz2), transcript variant 1, mRNA.                              |
| 2710259 | 0.04330814  | up | 1.7411138 | Brd2          | 14312     | Mus musculus bromodomain containing 2 (Brd2), transcript variant 1, mRNA.                                         |
| 1070070 | 0.020921338 | up | 1.7406695 | Gtf3c1        | 233863    | Mus musculus general transcription factor III C 1 (Gtf3c1), mRNA.                                                 |
| 1110338 | 0.020921338 | up | 1.7392803 | Mbd1          | 17190     | Mus musculus methyl-CpG binding domain protein 1 (Mbd1), mRNA.                                                    |
| 6270296 | 0.020921338 | up | 1.7307491 | Slc9a3r1      | 26941     | Mus musculus solute carrier family 9 (sodium/hydrogen exchanger), member 3 regulator 1 (Slc9a3r1), mRNA.          |
| 4490750 | 0.020921338 | up | 1.7260427 | Tbxa2r        | 21390     | Mus musculus thromboxane A2 receptor (Tbxa2r), mRNA.                                                              |
| 1190066 | 0.020921338 | up | 1.7217326 | Ckap5         | 75786     | Mus musculus cytoskeleton associated protein 5 (Ckap5), mRNA.                                                     |
| 6510653 | 0.020921338 | up | 1.7193562 | Ap2a1         | 11771     | Mus musculus adaptor protein complex AP-2, alpha 1 subunit (Ap2a1), transcript variant 2, mRNA.                   |
| 4480070 | 0.020921338 | up | 1.7166408 | Ncapd2        | 68298     | Mus musculus non-SMC condensin I complex, subunit D2 (Ncapd2), mRNA.                                              |
| 2120086 | 0.04330814  | up | 1.7145892 | Pip4k2b       | 108083    | Mus musculus phosphatidylinositol-5-phosphate 4-kinase, type II, beta (Pip4k2b), mRNA.                            |
| 2070148 | 0.020921338 | up | 1.7136986 | Xrcc1         | 22594     | Mus musculus X-ray repair complementing defective repair in Chinese hamster cells 1 (Xrcc1), mRNA.                |
| 4810424 | 0.020921338 | up | 1.6933789 | Map3k11       | 26403     | Mus musculus mitogen-activated protein kinase kinase kinase 11 (Map3k11), mRNA.                                   |
| 6590286 | 0.020921338 | up | 1.6910754 | P2ry5         | 67168     | Mus musculus purinergic receptor P2Y, G-protein coupled, 5 (P2ry5), mRNA.                                         |
| 5870382 | 0.04330814  | up | 1.6909163 | Samd4b        | 233033    | Mus musculus sterile alpha motif domain containing 4B (Samd4b), mRNA.                                             |
| 1470253 | 0.020921338 | up | 1.690696  | Apbb1ip       |           |                                                                                                                   |
| 2480475 | 0.020921338 | up | 1.6889768 | Sesn1         | 140742    | Mus musculus sestrin 1 (Sesn1), mRNA.                                                                             |
| 6770470 | 0.020921338 | up | 1.68803   | LOC100045419  | 100045419 | PREDICTED: Mus musculus similar to helios (LOC100045419), mRNA.                                                   |
| 7550156 | 0.020921338 | up | 1.687042  | Ccnb1         | 268697    | Mus musculus cyclin B1 (Ccnb1), mRNA.                                                                             |
| 2810156 | 0.020921338 | up | 1.6845539 | Eif4g2        | 13690     | Mus musculus eukaryotic translation initiation factor 4, gamma 2 (Eif4g2), transcript variant 1, mRNA.            |
| 6420170 | 0.04330814  | up | 1.6835097 | BC006779      |           |                                                                                                                   |
| 1470408 | 0.020921338 | up | 1.682403  | Cxcr5         | 12145     | Mus musculus chemokine (C-X-C motif) receptor 5 (Cxcr5), mRNA.                                                    |
| 1740575 | 0.04330814  | up | 1.6820371 | Ars2          | 83701     | Mus musculus arsenate resistance protein 2 (Ars2), mRNA.                                                          |
| 4810131 | 0.04330814  | up | 1.6817768 | Ars2          | 83701     | Mus musculus arsenate resistance protein 2 (Ars2), mRNA.                                                          |
| 3440377 | 0.04330814  | up | 1.6808349 | 2810422O20Rik | 69962     | Mus musculus RIKEN cDNA 2810422O20 gene (2810422O20Rik), mRNA.                                                    |
| 3400079 | 0.04330814  | up | 1.6770511 | Apbb1ip       | 54519     | Mus musculus amyloid beta (A4) precursor protein-binding, family B, member 1 interacting protein (Apbb1ip), mRNA. |
| 4210563 | 0.04330814  | up | 1.6754745 | Arhgef1       | 16801     | Mus musculus Rho guanine nucleotide exchange factor (GEF) 1 (Arhgef1), mRNA.                                      |
| 2680010 | 0.04330814  | up | 1.6704656 | 3000004C01Rik | 70218     | Mus musculus RIKEN cDNA 3000004C01 gene (3000004C01Rik), mRNA.                                                    |
| 60059   | 0.020921338 | up | 1.6648496 | Zfp251        | 71591     | Mus musculus zinc finger protein 251 (Zfp251), mRNA.                                                              |
| 4670458 | 0.04330814  | up | 1.6597716 | Jak1          | 16451     | Mus musculus Janus kinase 1 (Jak1), mRNA.                                                                         |
| 1450202 | 0.020921338 | up | 1.6585383 | Ahdc1         | 230793    | Mus musculus AT hook, DNA binding motif, containing 1 (Ahdc1), mRNA.                                              |
| 130608  | 0.020921338 | up | 1.657617  | Lag3          | 16768     | Mus musculus lymphocyte-activation gene 3 (Lag3), mRNA.                                                           |
| 2900300 | 0.020921338 | up | 1.6525044 | Pbk           | 52033     | Mus musculus PDZ binding kinase (Pbk), mRNA.                                                                      |
| 4390327 | 0.020921338 | up | 1.6473824 | Pitpnm1       | 18739     | Mus musculus phosphatidylinositol membrane-associated 1 (Pitpnm1), mRNA.                                          |
| 7400142 | 0.020921338 | up | 1.6472447 | Tk1           | 21877     | Mus musculus thymidine kinase 1 (Tk1), mRNA.                                                                      |
| 3450372 | 0.020921338 | up | 1.6465871 | Git2          | 26431     | Mus musculus G protein-coupled receptor kinase-interactor 2 (Git2), transcript variant 1, mRNA.                   |
| 110270  | 0.04330814  | up | 1.637502  | Zc3h3         | 223642    | Mus musculus zinc finger CCCH type containing 3 (Zc3h3), mRNA.                                                    |
| 1440528 | 0.020921338 | up | 1.6370726 | B4galnt4      | 330671    | Mus musculus beta-1,4-N-acetyl-galactosaminyl transferase 4 (B4galnt4), mRNA.                                     |
| 5550356 | 0.020921338 | up | 1.6357657 | Gtf2ird1      | 57080     | Mus musculus general transcription factor II I repeat domain-containing 1 (Gtf2ird1), transcript variant 2, mRNA. |
| 10204   | 0.020921338 | up | 1.6334292 | Slc35c2       | 228875    | Mus musculus solute carrier family 35, member C2 (Slc35c2), mRNA.                                                 |
| 4260209 | 0.020921338 | up | 1.633413  | Acin1         | 56215     | Mus musculus apoptotic chromatin condensation inducer 1 (Acin1), transcript variant 2, mRNA.                      |
| 4640142 | 0.04330814  | up | 1.6324196 | Eef1a1        |           |                                                                                                                   |
| 5870059 | 0.04330814  | up | 1.6320684 | Wbp11         | 60321     | Mus musculus WW domain binding protein 11 (Wbp11), mRNA.                                                          |
| 630634  | 0.020921338 | up | 1.6310217 | Incenp        | 16319     | Mus musculus inner centromere protein (Incenp), mRNA.                                                             |
| 2030152 | 0.020921338 | up | 1.6306177 | Atg2a         | 329015    | Mus musculus ATG2 autophagy related 2 homolog A (S. cerevisiae) (Atg2a), mRNA.                                    |
| 7150377 | 0.04330814  | up | 1.63022   | Cd83          | 12522     | Mus musculus CD83 antigen (Cd83), mRNA.                                                                           |
| 4180471 | 0.020921338 | up | 1.6292384 | Nt5e          | 23959     | Mus musculus 5' nucleotidase, ecto (Nt5e), mRNA.                                                                  |
| 2940097 | 0.020921338 | up | 1.6263717 | Psme3         | 19192     | Mus musculus proteasome (prosome, macropain) 28 subunit, 3 (Psme3), mRNA.                                         |
| 2070747 | 0.020921338 | up | 1.6262417 | Gns           | 75612     | Mus musculus glucosamine (N-acetyl)-6-sulfatase (Gns), mRNA.                                                      |

|         |             |    |           |               |           |                                                                                                                    |
|---------|-------------|----|-----------|---------------|-----------|--------------------------------------------------------------------------------------------------------------------|
| 70243   | 0.04330814  | up | 1.624707  | 9130221H12Rik | 77124     | Mus musculus RIKEN cDNA 9130221H12 gene (9130221H12Rik), mRNA.                                                     |
| 6420040 | 0.020921338 | up | 1.6226832 | Src           | 20779     | Mus musculus Rous sarcoma oncogene (Src), transcript variant 2, mRNA.                                              |
| 4730026 | 0.020921338 | up | 1.6217554 | Cpsf1         | 94230     | Mus musculus cleavage and polyadenylation specific factor 1 (Cpsf1), mRNA.                                         |
| 2850725 | 0.020921338 | up | 1.6156887 | 4930572J05Rik | 223626    | Mus musculus RIKEN cDNA 4930572J05 gene (4930572J05Rik), mRNA.                                                     |
| 4390288 | 0.020921338 | up | 1.6156045 | Gal           | 14419     | Mus musculus galanin (Gal), mRNA.                                                                                  |
| 110471  | 0.020921338 | up | 1.6106657 | Id3           | 15903     | Mus musculus inhibitor of DNA binding 3 (Id3), mRNA.                                                               |
| 620048  | 0.020921338 | up | 1.6089865 | Sec24c        | 218811    | Mus musculus Sec24 related gene family, member C ( <i>S. cerevisiae</i> ) (Sec24c), mRNA.                          |
| 6250619 | 0.020921338 | up | 1.6078727 | Tnfsf14       | 50930     | Mus musculus tumor necrosis factor (ligand) superfamily, member 14 (Tnfsf14), mRNA.                                |
| 6550356 | 0.04330814  | up | 1.6054908 | Wiz           | 22404     | Mus musculus widely-interspaced zinc finger motifs (Wiz), transcript variant 2, mRNA.                              |
| 70577   | 0.020921338 | up | 1.604114  | Cxxc1         | 74322     | Mus musculus CXXC finger 1 (PHD domain) (Cxxc1), mRNA.                                                             |
| 110338  | 0.020921338 | up | 1.6008414 | Rad50         | 19360     | Mus musculus RAD50 homolog ( <i>S. cerevisiae</i> ) (Rad50), mRNA.                                                 |
| 1570154 | 0.020921338 | up | 1.6007028 | Rhod          | 11854     | Mus musculus ras homolog gene family, member D (Rhod), mRNA.                                                       |
| 5670398 | 0.020921338 | up | 1.5981315 | Trim21        | 20821     | Mus musculus tripartite motif-containing 21 (Trim21), transcript variant 1, mRNA.                                  |
| 1110497 | 0.020921338 | up | 1.5980108 | Dgkz          | 104418    | Mus musculus diacylglycerol kinase zeta (Dgkz), mRNA.                                                              |
| 5720474 | 0.04330814  | up | 1.59682   | Mbd1          | 17190     | Mus musculus methyl-CpG binding domain protein 1 (Mbd1), mRNA.                                                     |
| 4280131 | 0.020921338 | up | 1.595875  | Slc24a3       | 94249     | Mus musculus solute carrier family 24 (sodium/potassium/calcium exchanger), member 3 (Slc24a3), mRNA.              |
| 7100711 | 0.020921338 | up | 1.5952737 | Zbtb45        | 232879    | Mus musculus zinc finger and BTB domain containing 45 (Zbtb45), mRNA.                                              |
| 870161  | 0.04330814  | up | 1.594174  | Sec16a        | 227648    | Mus musculus SEC16 homolog A ( <i>S. cerevisiae</i> ) (Sec16a), mRNA.                                              |
| 1260400 | 0.020921338 | up | 1.5939208 | Stxbp1        | 20910     | Mus musculus syntaxin binding protein 1 (Stxbp1), mRNA.                                                            |
| 4210072 | 0.04330814  | up | 1.5928162 | LOC100045304  | 100045304 | PREDICTED: Mus musculus similar to neurofilament protein (LOC100045304), mRNA.                                     |
| 630086  | 0.020921338 | up | 1.5897932 | Zscan2        | 22691     | Mus musculus zinc finger and SCAN domain containing 2 (Zscan2), mRNA.                                              |
| 3060767 | 0.020921338 | up | 1.589782  | Lig1          | 16881     | Mus musculus ligase I, DNA, ATP-dependent (Lig1), transcript variant 2, mRNA.                                      |
| 4260424 | 0.020921338 | up | 1.5886745 | Ptger2        | 19217     | Mus musculus prostaglandin E receptor 2 (subtype EP2) (Ptger2), mRNA.                                              |
| 1780543 | 0.020921338 | up | 1.5884776 | Kif2c         | 73804     | Mus musculus kinesin family member 2C (Kif2c), mRNA. XM_986361                                                     |
| 6380209 | 0.020921338 | up | 1.5875425 | Tbx21         | 57765     | Mus musculus T-box 21 (Tbx21), mRNA.                                                                               |
| 1260736 | 0.020921338 | up | 1.5823697 | Ppp1r9b       | 217124    | Mus musculus protein phosphatase 1, regulatory subunit 9B (Ppp1r9b), mRNA.                                         |
| 4780408 | 0.020921338 | up | 1.5789363 | Rnf40         | 233900    | Mus musculus ring finger protein 40 (Rnf40), mRNA.                                                                 |
| 1240433 | 0.04330814  | up | 1.5780102 | Hdac4         | 208727    | Mus musculus histone deacetylase 4 (Hdac4), mRNA.                                                                  |
| 6860022 | 0.020921338 | up | 1.5772036 | Dtx1          | 14357     | Mus musculus deltex 1 homolog ( <i>Drosophila</i> ) (Dtx1), mRNA.                                                  |
| 3610228 | 0.020921338 | up | 1.5763762 | Csda          | 56449     | Mus musculus cold shock domain protein A (Csda), mRNA.                                                             |
| 4850176 | 0.04330814  | up | 1.5754374 | Fkbp5         | 14229     | Mus musculus FK506 binding protein 5 (Fkbp5), mRNA.                                                                |
| 360743  | 0.020921338 | up | 1.5752367 | Nrp1          | 18186     | Mus musculus neuropilin 1 (Nrp1), mRNA.                                                                            |
| 2510546 | 0.04330814  | up | 1.5723186 | Slc9a8        | 77031     | Mus musculus solute carrier family 9 (sodium/hydrogen exchanger), member 8 (Slc9a8), transcript variant 2, mRNA.   |
| 4200088 | 0.04330814  | up | 1.5699052 | Ptk2b         | 19229     | Mus musculus PTK2 protein tyrosine kinase 2 beta (Ptk2b), mRNA.                                                    |
| 3610400 | 0.04330814  | up | 1.567517  | Rbak          | 57782     | Mus musculus RB-associated KRAB repressor (Rbak), transcript variant 1, mRNA.                                      |
| 990754  | 0.020921338 | up | 1.565268  | Dlgap4        | 228836    | Mus musculus discs, large homolog-associated protein 4 ( <i>Drosophila</i> ) (Dlgap4), transcript variant 2, mRNA. |
| 6040142 | 0.020921338 | up | 1.564713  | Pou6f1        | 19009     | Mus musculus POU domain, class 6, transcription factor 1 (Pou6f1), mRNA.                                           |
| 7400408 | 0.020921338 | up | 1.5629312 | Prkcbp1       | 228880    | Mus musculus protein kinase C binding protein 1 (Prkcbp1), mRNA.                                                   |
| 1710368 | 0.020921338 | up | 1.5609081 | 3000004C01Rik | 70218     | Mus musculus RIKEN cDNA 3000004C01 gene (3000004C01Rik), mRNA.                                                     |
| 2190164 | 0.020921338 | up | 1.5577632 | Ccnb1         | 268697    | Mus musculus cyclin B1 (Ccnb1), mRNA.                                                                              |
| 6510253 | 0.020921338 | up | 1.557309  | Hist1h2ao     | 319171    | Mus musculus histone cluster 1, H2ao (Hist1h2ao), mRNA.                                                            |
| 5870669 | 0.020921338 | up | 1.5550078 | A830007P12Rik | 227612    | Mus musculus RIKEN cDNA A830007P12 gene (A830007P12Rik), mRNA.                                                     |
| 3290270 | 0.04330814  | up | 1.5549146 | Hsp105        |           |                                                                                                                    |
| 6900563 | 0.04330814  | up | 1.5547003 | Rasa1         | 218397    | Mus musculus RAS p21 protein activator 1 (Rasa1), mRNA.                                                            |
| 4120593 | 0.020921338 | up | 1.5534354 | Men1          | 17283     | Mus musculus multiple endocrine neoplasia 1 (Men1), mRNA.                                                          |
| 3840066 | 0.04330814  | up | 1.5519677 | Lip1          |           |                                                                                                                    |
| 510367  | 0.020921338 | up | 1.5502024 | Sphk2         | 56632     | Mus musculus sphingosine kinase 2 (Sphk2), transcript variant 2, mRNA.                                             |
| 3940672 | 0.04330814  | up | 1.5490571 | Dgka          | 13139     | Mus musculus diacylglycerol kinase, alpha (Dgka), mRNA.                                                            |
| 160463  | 0.020921338 | up | 1.5485286 | Lgals3bp      | 19039     | Mus musculus lectin, galactoside-binding, soluble, 3 binding protein (Lgals3bp), mRNA.                             |
| 2490259 | 0.020921338 | up | 1.5481939 | Zkscan17      | 268417    | Mus musculus zinc finger with KRAB and SCAN domains 17 (Zkscan17), mRNA.                                           |
| 1820551 | 0.020921338 | up | 1.5478203 | Hdac5         | 15184     | Mus musculus histone deacetylase 5 (Hdac5), transcript variant 1, mRNA.                                            |
| 4180537 | 0.04330814  | up | 1.5456107 | LOC100044538  | 100044538 | PREDICTED: Mus musculus similar to immunity-associated nucleotide 4 (LOC100044538), misc RNA.                      |
| 110279  | 0.020921338 | up | 1.5448635 | Trp53         | 22059     | Mus musculus transformation related protein 53 (Trp53), mRNA.                                                      |

|         |             |    |           |           |        |                                                                                                                                 |
|---------|-------------|----|-----------|-----------|--------|---------------------------------------------------------------------------------------------------------------------------------|
| 6840022 | 0.020921338 | up | 1.5434086 | Rbm12     | 75710  | Mus musculus RNA binding motif protein 12 (Rbm12), transcript variant 1, mRNA.                                                  |
| 940382  | 0.020921338 | up | 1.5433214 | Trim56    | 384309 | Mus musculus tripartite motif-containing 56 (Trim56), mRNA.                                                                     |
| 2810725 | 0.04330814  | up | 1.5429544 | E4f1      | 13560  | Mus musculus E4F transcription factor 1 (E4f1), mRNA.                                                                           |
| 510020  | 0.020921338 | up | 1.5428112 | Pde2a     | 207728 | Mus musculus phosphodiesterase 2A, cGMP-stimulated (Pde2a), mRNA.                                                               |
| 6400348 | 0.020921338 | up | 1.5418352 | Rrm1      | 20133  | Mus musculus ribonucleotide reductase M1 (Rrm1), mRNA.                                                                          |
| 2570192 | 0.020921338 | up | 1.5406505 | Prkcbp1   | 228880 | Mus musculus protein kinase C binding protein 1 (Prkcbp1), mRNA.                                                                |
| 1980528 | 0.020921338 | up | 1.540536  | Sf3a1     | 67465  | Mus musculus splicing factor 3a, subunit 1 (Sf3a1), mRNA.                                                                       |
| 5310674 | 0.04330814  | up | 1.54053   | Tia1      | 21841  | Mus musculus cytotoxic granule-associated RNA binding protein 1 (Tia1), mRNA.                                                   |
| 2000048 | 0.020921338 | up | 1.540322  | Rnf123    | 84585  | Mus musculus ring finger protein 123 (Rnf123), mRNA.                                                                            |
| 6760433 | 0.020921338 | up | 1.5402409 | Zswim3    | 67538  | Mus musculus zinc finger, SWIM domain containing 3 (Zswim3), mRNA.                                                              |
| 2140681 | 0.020921338 | up | 1.5401962 | Prpf3     | 70767  | Mus musculus PRP3 pre-mRNA processing factor 3 homolog (yeast) (Prpf3), mRNA.                                                   |
| 7150059 | 0.020921338 | up | 1.5399451 | Whrn      | 73750  | Mus musculus whirlin (Whrn), transcript variant 6, mRNA.                                                                        |
| 2190019 | 0.020921338 | up | 1.5396124 | Smarcc2   | 68094  | Mus musculus SWI/SNF related, matrix associated, actin dependent regulator of chromatin, subfamily c, member 2 (Smarcc2), mRNA. |
| 6060379 | 0.04330814  | up | 1.5391904 | Cdc2a     | 12534  | Mus musculus cell division cycle 2 homolog A (S. pombe) (Cdc2a), mRNA.                                                          |
| 4480288 | 0.020921338 | up | 1.5334342 | Trp53i11  | 277414 | Mus musculus transformation related protein 53 inducible protein 11 (Trp53i11), mRNA.                                           |
| 2600025 | 0.020921338 | up | 1.5333135 | Bahd1     | 228536 | Mus musculus bromo adjacent homology domain containing 1 (Bahd1), mRNA.                                                         |
| 2190241 | 0.020921338 | up | 1.5329534 | Pacsin1   | 23969  | Mus musculus protein kinase C and casein kinase substrate in neurons 1 (Pacsin1), mRNA.                                         |
| 1850176 | 0.020921338 | up | 1.5327309 | Golga2    | 99412  | Mus musculus golgi autoantigen, golgin subfamily a, 2 (Golga2), transcript variant 1, mRNA.                                     |
| 2650370 | 0.020921338 | up | 1.5327177 | Ralbp1    | 19765  | Mus musculus ralA binding protein 1 (Ralbp1), mRNA.                                                                             |
| 1050670 | 0.020921338 | up | 1.531206  | Fkbp4     | 14228  | Mus musculus FK506 binding protein 4 (Fkbp4), mRNA.                                                                             |
| 4150504 | 0.04330814  | up | 1.529942  | Dpp9      | 224897 | Mus musculus dipeptidylpeptidase 9 (Dpp9), mRNA.                                                                                |
| 4250711 | 0.020921338 | up | 1.5298536 | Hist1h2af | 319173 | Mus musculus histone cluster 1, H2af (Hist1h2af), mRNA.                                                                         |
| 1580626 | 0.020921338 | up | 1.5272871 | Sgol1     | 72415  | Mus musculus shugoshin-like 1 (S. pombe) (Sgol1), mRNA.                                                                         |
| 5700541 | 0.020921338 | up | 1.526195  | Sfrs7     | 225027 | Mus musculus splicing factor, arginine/serine-rich 7 (Sfrs7), mRNA.                                                             |
| 6760575 | 0.020921338 | up | 1.5258582 | Zfp809    | 235047 | Mus musculus zinc finger protein 809 (Zfp809), mRNA.                                                                            |
| 4780253 | 0.020921338 | up | 1.5249016 | Oasl1     | 231655 | Mus musculus 2'-5' oligoadenylate synthetase-like 1 (Oasl1), mRNA.                                                              |
| 10358   | 0.020921338 | up | 1.5246155 | Foxp4     | 74123  | Mus musculus forkhead box P4 (Foxp4), mRNA.                                                                                     |
| 540239  | 0.04330814  | up | 1.5244273 | Tnrc6a    | 233833 | Mus musculus trinucleotide repeat containing 6a (Tnrc6a), mRNA.                                                                 |
| 50259   | 0.020921338 | up | 1.5234106 | Cops7a    | 26894  | Mus musculus COP9 (constitutive photomorphogenic) homolog, subunit 7a (Arabidopsis thaliana) (Cops7a), mRNA.                    |
| 160746  | 0.020921338 | up | 1.5222896 | Men1      | 17283  | Mus musculus multiple endocrine neoplasia 1 (Men1), mRNA.                                                                       |
| 3830390 | 0.020921338 | up | 1.5216943 | Grik5     | 14809  | Mus musculus glutamate receptor, ionotropic, kainate 5 (gamma 2) (Grik5), mRNA.                                                 |
| 6840689 | 0.020921338 | up | 1.521618  | Ptpn21    | 24000  | Mus musculus protein tyrosine phosphatase, non-receptor type 21 (Ptpn21), mRNA.                                                 |
| 6960577 | 0.020921338 | up | 1.5214001 | Sorl1     | 20660  | Mus musculus sortilin-related receptor, LDLR class A repeats-containing (Sorl1), mRNA.                                          |
| 7000333 | 0.020921338 | up | 1.521187  | Bet1l     | 54399  | Mus musculus blocked early in transport 1 homolog (S. cerevisiae)-like (Bet1l), mRNA.                                           |
| 780768  | 0.020921338 | up | 1.5184573 | Eml4      | 78798  | Mus musculus echinoderm microtubule associated protein like 4 (Eml4), mRNA.                                                     |
| 6220438 | 0.020921338 | up | 1.5182319 | Abcd1     | 11666  | Mus musculus ATP-binding cassette, sub-family D (ALD), member 1 (Abcd1), mRNA. XM_973409                                        |
| 5560014 | 0.04330814  | up | 1.5177194 | Ube3b     | 117146 | Mus musculus ubiquitin protein ligase E3B (Ube3b), mRNA.                                                                        |
| 430669  | 0.04330814  | up | 1.5169888 | Ppp1r13b  | 21981  | Mus musculus protein phosphatase 1, regulatory (inhibitor) subunit 13B (Ppp1r13b), mRNA.                                        |
| 6270470 | 0.04330814  | up | 1.5168556 | Cux1      | 13047  | Mus musculus cut-like homeobox 1 (Cux1), transcript variant 2, mRNA.                                                            |
| 4150397 | 0.020921338 | up | 1.5165917 | Hk1       | 15275  | Mus musculus hexokinase 1 (Hk1), nuclear gene encoding mitochondrial protein, mRNA.                                             |
| 6940086 | 0.020921338 | up | 1.5164661 | Lman2l    | 214895 | Mus musculus lectin, mannose-binding 2-like (Lman2l), mRNA.                                                                     |
| 4070020 | 0.020921338 | up | 1.5156782 | Bcl3      | 12051  | Mus musculus B-cell leukemia/lymphoma 3 (Bcl3), mRNA.                                                                           |
| 4780475 | 0.020921338 | up | 1.5109854 | C87436    | 232196 | Mus musculus expressed sequence C87436 (C87436), mRNA.                                                                          |
| 2510376 | 0.020921338 | up | 1.5094151 | Atmin     | 234776 | Mus musculus ATM interactor (Atmin), mRNA.                                                                                      |
| 2650253 | 0.020921338 | up | 1.5087472 | Rps27l    | 67941  | Mus musculus ribosomal protein S27-like (Rps27l), mRNA.                                                                         |
| 6220609 | 0.020921338 | up | 1.5085435 | Zfp41     |        |                                                                                                                                 |
| 4040523 | 0.020921338 | up | 1.5073951 | Inpp5d    | 16331  | Mus musculus inositol polyphosphate-5-phosphatase D (Inpp5d), mRNA.                                                             |
| 1240543 | 0.020921338 | up | 1.505608  | Ptger2    | 19217  | Mus musculus prostaglandin E receptor 2 (subtype EP2) (Ptger2), mRNA.                                                           |
| 1770605 | 0.020921338 | up | 1.5048771 | Upf1      | 19704  | Mus musculus UPF1 regulator of nonsense transcripts homolog (yeast) (Upf1), mRNA.                                               |
| 7400110 | 0.020921338 | up | 1.5046319 | Rbm5      | 83486  | Mus musculus RNA binding motif protein 5 (Rbm5), mRNA.                                                                          |
| 3400546 | 0.020921338 | up | 1.5043387 | Slc12a2   | 20496  | Mus musculus solute carrier family 12, member 2 (Slc12a2), mRNA.                                                                |
| 2970521 | 0.020921338 | up | 1.5043089 | Parp14    | 547253 | Mus musculus poly (ADP-ribose) polymerase family, member 14 (Parp14), mRNA. XM_901644 XM_916789 XM_924484 XM_924488             |

|         |             |    |           |               |           |                                                                                                                                                  |
|---------|-------------|----|-----------|---------------|-----------|--------------------------------------------------------------------------------------------------------------------------------------------------|
| 1440113 | 0.04330814  | up | 1.5042285 | Calcoco1      | 67488     | Mus musculus calcium binding and coiled coil domain 1 (Calcoco1), mRNA.                                                                          |
| 160333  | 0.020921338 | up | 1.5030229 | Mllt3         | 70122     | Mus musculus myeloid/lymphoid or mixed-lineage leukemia (trithorax homolog, Drosophila); translocated to, 3 (Mllt3), transcript variant 1, mRNA. |
| 240187  | 0.020921338 | up | 1.500955  | Oasl1         | 231655    | Mus musculus 2'-5' oligoadenylate synthetase-like 1 (Oasl1), mRNA.                                                                               |
| 1770239 | 0.04330814  | up | 1.4986019 | Rgs10         | 67865     | Mus musculus regulator of G-protein signalling 10 (Rgs10), mRNA.                                                                                 |
| 6660050 | 0.020921338 | up | 1.4985217 | Kif4          | 16571     | Mus musculus kinesin family member 4 (Kif4), mRNA.                                                                                               |
| 510441  | 0.020921338 | up | 1.4967221 | Rad9          | 19367     | Mus musculus RAD9 homolog ( <i>S. pombe</i> ) (Rad9), mRNA.                                                                                      |
| 7400546 | 0.04330814  | up | 1.4943769 | Supt5h        | 20924     | Mus musculus suppressor of Ty 5 homolog ( <i>S. cerevisiae</i> ) (Supt5h), mRNA.                                                                 |
| 1450397 | 0.020921338 | up | 1.4940444 | Ctdp1         | 67655     | Mus musculus CTD (carboxy-terminal domain, RNA polymerase II, polypeptide A) phosphatase, subunit 1 (Ctdp1), mRNA.                               |
| 2350551 | 0.04330814  | up | 1.4924351 | Rltpr         | 234695    | Mus musculus RGD motif, leucine rich repeats, tropomodulin domain and proline-rich containing (Rltpr), mRNA.                                     |
| 7550626 | 0.020921338 | up | 1.4917607 | Vegfb         | 22340     | Mus musculus vascular endothelial growth factor B (Vegfb), mRNA.                                                                                 |
| 1690376 | 0.04330814  | up | 1.4886783 | Sh3kbp1       | 58194     | Mus musculus SH3-domain kinase binding protein 1 (Sh3kbp1), mRNA.                                                                                |
| 3990474 | 0.020921338 | up | 1.4876895 | Il10ra        | 16154     | Mus musculus interleukin 10 receptor, alpha (Il10ra), mRNA.                                                                                      |
| 7200324 | 0.020921338 | up | 1.4876275 | Bcat2         | 12036     | Mus musculus branched chain aminotransferase 2, mitochondrial (Bcat2), mRNA.                                                                     |
| 4850736 | 0.020921338 | up | 1.4866779 | Tmem59        | 56374     | Mus musculus transmembrane protein 59 (Tmem59), mRNA.                                                                                            |
| 2690195 | 0.020921338 | up | 1.4859409 | Mknk2         | 17347     | Mus musculus MAP kinase-interacting serine/threonine kinase 2 (Mknk2), mRNA.                                                                     |
| 1510739 | 0.020921338 | up | 1.485484  | Cd82          | 12521     | Mus musculus CD82 antigen (Cd82), mRNA.                                                                                                          |
| 1300521 | 0.020921338 | up | 1.485391  | Mllt1         | 64144     | Mus musculus myeloid/lymphoid or mixed-lineage leukemia (trithorax homolog, Drosophila); translocated to, 1 (Mllt1), mRNA.                       |
| 780189  | 0.020921338 | up | 1.4850283 | Immt          | 76614     | Mus musculus inner membrane protein, mitochondrial (Immt), nuclear gene encoding mitochondrial protein, mRNA.                                    |
| 2750168 | 0.020921338 | up | 1.4849703 | Adnp          | 11538     | Mus musculus activity-dependent neuroprotective protein (Adnp), mRNA.                                                                            |
| 7040161 | 0.020921338 | up | 1.484095  | Mapkapk3      | 102626    | Mus musculus mitogen-activated protein kinase-activated protein kinase 3 (Mapkapk3), mRNA.                                                       |
| 4830411 | 0.020921338 | up | 1.482719  | Ttll5         | 320244    | Mus musculus tubulin tyrosine ligase-like family, member 5 (Ttll5), mRNA.                                                                        |
| 1690768 | 0.04330814  | up | 1.4814667 | Ccl5          | 20304     | Mus musculus chemokine (C-C motif) ligand 5 (Ccl5), mRNA.                                                                                        |
| 6860253 | 0.04330814  | up | 1.4804947 | H13           | 14950     | Mus musculus histocompatibility 13 (H13), mRNA.                                                                                                  |
| 6020554 | 0.04330814  | up | 1.4780135 | Zfp653        | 319601    | Mus musculus zinc finger protein 653 (Zfp653), mRNA.                                                                                             |
| 2600072 | 0.020921338 | up | 1.4760754 | Gne           | 50798     | Mus musculus glucosamine (Gne), mRNA.                                                                                                            |
| 4920039 | 0.020921338 | up | 1.4751878 | C530028I08Rik | 232933    | Mus musculus RIKEN cDNA C530028I08 gene (C530028I08Rik), mRNA.                                                                                   |
| 3400523 | 0.020921338 | up | 1.4749786 | Npas4         | 225872    | Mus musculus neuronal PAS domain protein 4 (Npas4), mRNA.                                                                                        |
| 5700722 | 0.04330814  | up | 1.4747819 | Ece1          | 230857    | Mus musculus endothelin converting enzyme 1 (Ece1), mRNA.                                                                                        |
| 3310176 | 0.020921338 | up | 1.4731338 | Usp21         | 30941     | Mus musculus ubiquitin specific peptidase 21 (Usp21), mRNA.                                                                                      |
| 150433  | 0.020921338 | up | 1.4710841 | Gimap1        | 16205     | Mus musculus GTPase, IMAP family member 1 (Gimap1), transcript variant 1, mRNA.                                                                  |
| 1820307 | 0.020921338 | up | 1.4707798 | Zfp87         | 170763    | Mus musculus zinc finger protein 87 (Zfp87), mRNA.                                                                                               |
| 4860070 | 0.020921338 | up | 1.4697025 | Hip1r         | 29816     | Mus musculus huntingtin interacting protein 1 related (Hip1r), mRNA.                                                                             |
| 5870521 | 0.020921338 | up | 1.4680105 | D930015E06Rik | 229473    | Mus musculus RIKEN cDNA D930015E06 gene (D930015E06Rik), mRNA.                                                                                   |
| 4150369 | 0.020921338 | up | 1.4679728 | Daxx          | 13163     | Mus musculus Fas death domain-associated protein (Daxx), mRNA.                                                                                   |
| 5050427 | 0.04330814  | up | 1.467459  | Lamc1         | 226519    | Mus musculus laminin, gamma 1 (Lamc1), mRNA.                                                                                                     |
| 5820608 | 0.020921338 | up | 1.4662341 | Irgm1         | 15944     | Mus musculus immunity-related GTPase family M member 1 (Irgm1), mRNA.                                                                            |
| 3390608 | 0.020921338 | up | 1.4662169 | 4732471D19Rik | 319719    | Mus musculus RIKEN cDNA 4732471D19 gene (4732471D19Rik), mRNA.                                                                                   |
| 510341  | 0.020921338 | up | 1.4659678 | Rnf10         | 50849     | Mus musculus ring finger protein 10 (Rnf10), mRNA.                                                                                               |
| 5910424 | 0.04330814  | up | 1.4657924 | Sfrs4         | 57317     | Mus musculus splicing factor, arginine/serine-rich 4 (SRP75) (Sfrs4), mRNA.                                                                      |
| 3440646 | 0.04330814  | up | 1.4652281 | Prkcb         | 18751     | Mus musculus protein kinase C, beta (Prkcb), mRNA.                                                                                               |
| 1940722 | 0.020164572 | up | 1.4646388 | Casp1         | 12362     | Mus musculus caspase 1 (Casp1), mRNA.                                                                                                            |
| 770646  | 0.020921338 | up | 1.4640086 | Smug1         | 71726     | Mus musculus single-strand selective monofunctional uracil DNA glycosylase (Smug1), mRNA.                                                        |
| 3780471 | 0.020921338 | up | 1.4624925 | Tcf7          | 21414     | Mus musculus transcription factor 7, T-cell specific (Tcf7), mRNA.                                                                               |
| 6350324 | 0.020921338 | up | 1.4620603 | Gna14         | 14675     | Mus musculus guanine nucleotide binding protein, alpha 14 (Gna14), mRNA.                                                                         |
| 4070025 | 0.020921338 | up | 1.4601078 | Slc12a2       | 20496     | Mus musculus solute carrier family 12, member 2 (Slc12a2), mRNA.                                                                                 |
| 6620377 | 0.020921338 | up | 1.4586544 | Ctdsp1        | 227292    | Mus musculus CTD (carboxy-terminal domain, RNA polymerase II, polypeptide A) small phosphatase 1 (Ctdsp1), mRNA.                                 |
| 1770008 | 0.04330814  | up | 1.4580743 | Strn4         | 97387     | Mus musculus striatin, calmodulin binding protein 4 (Strn4), transcript variant 1, mRNA.                                                         |
| 7210564 | 0.020921338 | up | 1.4573239 | LOC100046996  | 100046996 | PREDICTED: Mus musculus similar to farnesyltransferase alpha subunit (LOC100046996), mRNA.                                                       |
| 520278  | 0.020921338 | up | 1.4570974 | Mx2           |           |                                                                                                                                                  |
| 5290193 | 0.04330814  | up | 1.4570725 | Ttpal         | 76080     | Mus musculus tocopherol (alpha) transfer protein-like (Ttpal), transcript variant 1, mRNA.                                                       |
| 4250338 | 0.020921338 | up | 1.4569936 | Rpain         | 69723     | Mus musculus RPA interacting protein (Rpain), mRNA.                                                                                              |
| 1110241 | 0.04330814  | up | 1.4562685 | Hsp90aa1      | 15519     | Mus musculus heat shock protein 90, alpha (cytosolic), class A member 1 (Hsp90aa1), mRNA.                                                        |
| 6130193 | 0.020921338 | up | 1.4555628 | Tpra40        |           |                                                                                                                                                  |

|         |             |    |           |               |           |                                                                                                                                 |
|---------|-------------|----|-----------|---------------|-----------|---------------------------------------------------------------------------------------------------------------------------------|
| 1430634 | 0.020921338 | up | 1.455159  | Zfp101        | 22643     | Mus musculus zinc finger protein 101 (Zfp101), mRNA.                                                                            |
| 3170497 | 0.020921338 | up | 1.4538996 | Ascc2         | 75452     | Mus musculus activating signal cointegrator 1 complex subunit 2 (Ascc2), mRNA.                                                  |
| 4810747 | 0.04330814  | up | 1.4536963 | Fsd2          | 244091    | Mus musculus fibronectin type III and SPRY domain containing 2 (Fsd2), mRNA.                                                    |
| 7510743 | 0.020921338 | up | 1.4531565 | Pols          | 210106    | Mus musculus polymerase (DNA directed) sigma (Pols), mRNA.                                                                      |
| 5050162 | 0.020164572 | up | 1.4526126 | Gorasp2       | 70231     | Mus musculus golgi reassembly stacking protein 2 (Gorasp2), mRNA.                                                               |
| 4570242 | 0.020921338 | up | 1.451212  | Scamp4        | 56214     | Mus musculus secretory carrier membrane protein 4 (Scamp4), mRNA.                                                               |
| 520753  | 0.020921338 | up | 1.4512107 | Ggt7          | 207182    | Mus musculus gamma-glutamyltransferase 7 (Ggt7), mRNA.                                                                          |
| 6370288 | 0.020921338 | up | 1.4496318 | Nup133        | 234865    | Mus musculus nucleoporin 133 (Nup133), mRNA.                                                                                    |
| 150592  | 0.04330814  | up | 1.4486902 | Tnrc18        | 231861    | Mus musculus trinucleotide repeat containing 18 (Tnrc18), transcript variant B, mRNA.                                           |
| 540707  | 0.020921338 | up | 1.4468071 | Slc25a42      | 73095     | Mus musculus solute carrier family 25, member 42 (Slc25a42), mRNA.                                                              |
| 2030435 | 0.020921338 | up | 1.4462527 | Aplp1         |           |                                                                                                                                 |
| 1050632 | 0.020164572 | up | 1.4452988 | Cxcr5         | 12145     | Mus musculus chemokine (C-X-C motif) receptor 5 (Cxcr5), mRNA.                                                                  |
| 6660470 | 0.04330814  | up | 1.4447101 | Jmjd1a        | 104263    | Mus musculus jumoni domain containing 1A (Jmjd1a), transcript variant 1, mRNA.                                                  |
| 10427   | 0.04330814  | up | 1.4443156 | 1200016B10Rik | 66875     | Mus musculus RIKEN cDNA 1200016B10 gene (1200016B10Rik), mRNA.                                                                  |
| 4120671 | 0.020921338 | up | 1.4440124 | Hspd1         | 15510     | Mus musculus heat shock protein 1 (chaperonin) (Hspd1), mRNA.                                                                   |
| 1770364 | 0.020921338 | up | 1.4431764 | Mov10         | 17454     | Mus musculus Moloney leukemia virus 10 (Mov10), mRNA.                                                                           |
| 2760240 | 0.020921338 | up | 1.4429272 | 1200016B10Rik | 66875     | Mus musculus RIKEN cDNA 1200016B10 gene (1200016B10Rik), mRNA.                                                                  |
| 7150035 | 0.020921338 | up | 1.4411017 | Abcf1         | 224742    | Mus musculus ATP-binding cassette, sub-family F (GCN20), member 1 (Abcf1), mRNA.                                                |
| 2900504 | 0.020921338 | up | 1.4409543 | Zfp817        | 238693    | Mus musculus zinc finger protein 817 (Zfp817), mRNA.                                                                            |
| 7330026 | 0.020921338 | up | 1.4405521 | Egr2          |           |                                                                                                                                 |
| 6110279 | 0.020921338 | up | 1.4394528 | Fuk           | 234730    | Mus musculus fucokinase (Fuk), transcript variant 2, mRNA.                                                                      |
| 5090747 | 0.020921338 | up | 1.4394383 | Prpf38b       | 66921     | Mus musculus PRP38 pre-mRNA processing factor 38 (yeast) domain containing B (Prpf38b), mRNA.                                   |
| 6520110 | 0.04330814  | up | 1.4390088 | Trip6         | 22051     | Mus musculus thyroid hormone receptor interactor 6 (Trip6), mRNA.                                                               |
| 4880392 | 0.020921338 | up | 1.4388905 | Scmh1         | 29871     | Mus musculus sex comb on midleg homolog 1 (Scmh1), mRNA.                                                                        |
| 4070278 | 0.020921338 | up | 1.4370397 | Slc12a6       | 107723    | Mus musculus solute carrier family 12, member 6 (Slc12a6), transcript variant 1, mRNA.                                          |
| 7550110 | 0.020921338 | up | 1.4332682 | LOC100047816  | 100047816 | PREDICTED: Mus musculus similar to Dnase1l2 protein (LOC100047816), mRNA.                                                       |
| 4760376 | 0.04330814  | up | 1.4331189 | LOC100048530  | 100048530 | PREDICTED: Mus musculus similar to coiled-coil domain containing 72 (LOC100048530), mRNA.                                       |
| 5390273 | 0.04330814  | up | 1.4324422 | Mtap1s        | 270058    | Mus musculus microtubule-associated protein 1S (Mtap1s), mRNA.                                                                  |
| 620754  | 0.04330814  | up | 1.431953  | Nelf          | 56876     | Mus musculus nasal embryonic LHRH factor (Nelf), transcript variant 2, mRNA.                                                    |
| 3800259 | 0.020921338 | up | 1.4317751 | Slc4a1ap      | 20534     | Mus musculus solute carrier family 4 (anion exchanger), member 1, adaptor protein (Slc4a1ap), mRNA.                             |
| 5090368 | 0.020921338 | up | 1.4311888 | Atp13a2       | 74772     | Mus musculus ATPase type 13A2 (Atp13a2), mRNA.                                                                                  |
| 380594  | 0.020921338 | up | 1.4308176 | Plcl2         | 224860    | Mus musculus phospholipase C-like 2 (Plcl2), mRNA.                                                                              |
| 1090327 | 0.04330814  | up | 1.4307107 | H2afx         | 15270     | Mus musculus H2A histone family, member X (H2afx), mRNA.                                                                        |
| 4850079 | 0.04330814  | up | 1.4294467 | Kif23         | 71819     | Mus musculus kinesin family member 23 (Kif23), mRNA.                                                                            |
| 2760619 | 0.04330814  | up | 1.4285926 | Vps16         | 80743     | Mus musculus vacuolar protein sorting 16 (yeast) (Vps16), mRNA.                                                                 |
| 2570187 | 0.020921338 | up | 1.4284658 | Zfp87         | 170763    | Mus musculus zinc finger protein 87 (Zfp87), mRNA.                                                                              |
| 6350647 | 0.020921338 | up | 1.4273869 | Alg14         | 66789     | Mus musculus asparagine-linked glycosylation 14 homolog (yeast) (Alg14), mRNA.                                                  |
| 4150019 | 0.020921338 | up | 1.4270694 | Zfp644        | 52397     | Mus musculus zinc finger protein 644 (Zfp644), mRNA.                                                                            |
| 940180  | 0.020921338 | up | 1.4264152 | Pik3ip1       | 216505    | Mus musculus phosphoinositide-3-kinase interacting protein 1 (Pik3ip1), mRNA.                                                   |
| 5290437 | 0.020921338 | up | 1.4258542 | Nacc1         | 66830     | Mus musculus nucleus accumbens associated 1, BEN and BTB (POZ) domain containing (Nacc1), mRNA.                                 |
| 4810370 | 0.020921338 | up | 1.4258196 | Smarca4       | 20586     | Mus musculus SWI/SNF related, matrix associated, actin dependent regulator of chromatin, subfamily a, member 4 (Smarca4), mRNA. |
| 5420086 | 0.04330814  | up | 1.4252142 | Upf1          | 19704     | Mus musculus UPF1 regulator of nonsense transcripts homolog (yeast) (Upf1), mRNA.                                               |
| 7610092 | 0.020921338 | up | 1.4247081 | Ubtf          | 21429     | Mus musculus upstream binding transcription factor, RNA polymerase I (Ubtf), transcript variant 2, mRNA.                        |
| 540148  | 0.020921338 | up | 1.4243414 | Prrx1         | 18933     | Mus musculus paired related homeobox 1 (Prrx1), transcript variant 2, mRNA.                                                     |
| 580408  | 0.04330814  | up | 1.423648  | Mbtd1         | 103537    | Mus musculus mbt domain containing 1 (Mbtd1), mRNA.                                                                             |
| 4390553 | 0.04330814  | up | 1.4229776 | 6330505N24Rik | 229474    | Mus musculus RIKEN cDNA 6330505N24 gene (6330505N24Rik), mRNA.                                                                  |
| 6400601 | 0.020921338 | up | 1.4228714 | Tm9sf4        | 99237     | Mus musculus transmembrane 9 superfamily protein member 4 (Tm9sf4), mRNA.                                                       |
| 5810044 | 0.020921338 | up | 1.4228392 | Rarg          | 19411     | Mus musculus retinoic acid receptor, gamma (Rarg), transcript variant 1, mRNA.                                                  |
| 6650364 | 0.020921338 | up | 1.4227593 | Ddx51         | 69663     | Mus musculus DEAD (Asp-Glu-Ala-Asp) box polypeptide 51 (Ddx51), mRNA.                                                           |
| 4850082 | 0.020921338 | up | 1.4224725 | Enpp5         | 83965     | Mus musculus ectonucleotide pyrophosphatase/phosphodiesterase 5 (Enpp5), mRNA.                                                  |
| 3830735 | 0.04330814  | up | 1.4221934 | Tyms-ps       | 22172     | Mus musculus thymidylate synthase, pseudogene (Tyms-ps), non-coding RNA.                                                        |
| 2120647 | 0.04330814  | up | 1.4219384 | Wipf1         | 215280    | Mus musculus WAS/WASL interacting protein family, member 1 (Wipf1), mRNA.                                                       |

|         |             |    |           |               |        |                                                                                                                 |
|---------|-------------|----|-----------|---------------|--------|-----------------------------------------------------------------------------------------------------------------|
| 830482  | 0.04330814  | up | 1.4218721 | Rbm38         | 56190  | Mus musculus RNA binding motif protein 38 (Rbm38), mRNA.                                                        |
| 1300477 | 0.04330814  | up | 1.421863  | Nup85         | 445007 | Mus musculus nucleoporin 85 (Nup85), mRNA.                                                                      |
| 5870722 | 0.020921338 | up | 1.421018  | Sec14l1       | 74136  | Mus musculus SEC14-like 1 ( <i>S. cerevisiae</i> ) (Sec14l1), mRNA.                                             |
| 2120243 | 0.020921338 | up | 1.4203682 | 2310005E10Rik | 67861  | Mus musculus RIKEN cDNA 2310005E10 gene (2310005E10Rik), mRNA.                                                  |
| 4860343 | 0.020921338 | up | 1.4193802 | Ecel1         | 13599  | Mus musculus endothelin converting enzyme-like 1 (Ecel1), mRNA.                                                 |
| 2030068 | 0.020921338 | up | 1.4191922 | Chaf1a        | 27221  | Mus musculus chromatin assembly factor 1, subunit A (p150) (Chaf1a), mRNA.                                      |
| 2000450 | 0.020921338 | up | 1.41902   | Cpt2          | 12896  | Mus musculus carnitine palmitoyltransferase 2 (Cpt2), mRNA.                                                     |
| 6220594 | 0.04330814  | up | 1.4186296 | Stat2         | 20847  | Mus musculus signal transducer and activator of transcription 2 (Stat2), mRNA.                                  |
| 4010035 | 0.04330814  | up | 1.4186071 | Ddx19a        | 13680  | Mus musculus DEAD (Asp-Glu-Ala-Asp) box polypeptide 19a (Ddx19a), mRNA.                                         |
| 1400630 | 0.020921338 | up | 1.4179776 | Cd151         |        |                                                                                                                 |
| 5360379 | 0.04330814  | up | 1.4174985 | Gtf2ird2      | 114674 | Mus musculus GTF2I repeat domain containing 2 (Gtf2ird2), mRNA.                                                 |
| 4120343 | 0.020921338 | up | 1.4169586 | Git1          | 216963 | Mus musculus G protein-coupled receptor kinase-interactor 1 (Git1), mRNA.                                       |
| 7160059 | 0.020921338 | up | 1.4164395 | Tnfrsf1a      | 21937  | Mus musculus tumor necrosis factor receptor superfamily, member 1a (Tnfrsf1a), mRNA.                            |
| 6590187 | 0.04330814  | up | 1.4162498 | Dgkz          | 104418 | Mus musculus diacylglycerol kinase zeta (Dgkz), mRNA.                                                           |
| 7050768 | 0.04330814  | up | 1.4157593 | Esco2         | 71988  | Mus musculus establishment of cohesion 1 homolog 2 ( <i>S. cerevisiae</i> ) (Esco2), mRNA.                      |
| 2320647 | 0.020921338 | up | 1.4156853 | Abhd8         | 64296  | Mus musculus abhydrolase domain containing 8 (Abhd8), mRNA.                                                     |
| 6550376 | 0.04330814  | up | 1.4151227 | Ly6e          | 17069  | Mus musculus lymphocyte antigen 6 complex, locus E (Ly6e), mRNA.                                                |
| 1260022 | 0.020921338 | up | 1.4144717 | Chtf18        | 214901 | Mus musculus CTF18, chromosome transmission fidelity factor 18 homolog ( <i>S. cerevisiae</i> ) (Chtf18), mRNA. |
| 2060201 | 0.04330814  | up | 1.414129  | Ehmt2         | 110147 | Mus musculus euchromatic histone lysine N-methyltransferase 2 (Ehmt2), transcript variant short, mRNA.          |
| 4900360 | 0.020921338 | up | 1.4139526 | Tjap1         | 74094  | Mus musculus tight junction associated protein 1 (Tjap1), mRNA.                                                 |
| 2810274 | 0.04330814  | up | 1.4138451 | ORF61         | 216157 | Mus musculus open reading frame 61 (ORF61), mRNA.                                                               |
| 2650521 | 0.020921338 | up | 1.4128017 | Ccdc99        | 70385  | Mus musculus coiled-coil domain containing 99 (Ccdc99), mRNA.                                                   |
| 3830040 | 0.04330814  | up | 1.4125837 | Malt1         | 240354 | Mus musculus mucosa associated lymphoid tissue lymphoma translocation gene 1 (Malt1), mRNA.                     |
| 6060040 | 0.04330814  | up | 1.4123456 | Pctk1         | 18555  | Mus musculus PCTAIRE-motif protein kinase 1 (Pctk1), mRNA. XM_920756 XM_920762 XM_920768 XM_920773              |
| 7050433 | 0.020921338 | up | 1.4118023 | Lpxn          | 107321 | Mus musculus leupaxin (Lpxn), mRNA.                                                                             |
| 7050487 | 0.020921338 | up | 1.4114102 | Cd63          |        |                                                                                                                 |
| 5690373 | 0.020921338 | up | 1.4113199 | 5830404H04Rik | 207781 | Mus musculus RIKEN cDNA 5830404H04 gene (5830404H04Rik), mRNA.                                                  |
| 270730  | 0.04330814  | up | 1.4110993 | Ambra1        | 228361 | Mus musculus autophagy/beclin 1 regulator 1 (Ambra1), transcript variant 1, mRNA.                               |
| 4540538 | 0.020921338 | up | 1.4109344 | Triap1        | 69076  | Mus musculus TP53 regulated inhibitor of apoptosis 1 (Triap1), mRNA.                                            |
| 1980092 | 0.020921338 | up | 1.4105593 | Pias3         | 229615 | Mus musculus protein inhibitor of activated STAT 3 (Pias3), transcript variant 1, mRNA.                         |
| 1690685 | 0.020921338 | up | 1.4102072 | Tmem180       | 75146  | Mus musculus transmembrane protein 180 (Tmem180), mRNA.                                                         |
| 780475  | 0.04330814  | up | 1.4101877 | Prc1          | 233406 | Mus musculus protein regulator of cytokinesis 1 (Prc1), mRNA.                                                   |
| 2760427 | 0.020921338 | up | 1.4098846 | Il16          | 16170  | Mus musculus interleukin 16 (Il16), mRNA.                                                                       |
| 2680746 | 0.020921338 | up | 1.4071023 | Zc3h13        | 67302  | Mus musculus zinc finger CCCH type containing 13 (Zc3h13), mRNA.                                                |
| 6020632 | 0.04330814  | up | 1.4065223 | Spg7          | 234847 | Mus musculus spastic paraplegia 7 homolog (human) (Spg7), nuclear gene encoding mitochondrial protein, mRNA.    |
| 3120398 | 0.020921338 | up | 1.4062552 | Cdc5l         | 71702  | Mus musculus cell division cycle 5-like ( <i>S. pombe</i> ) (Cdc5l), mRNA.                                      |
| 3400600 | 0.020921338 | up | 1.4052014 | Zfp715        | 69930  | Mus musculus zinc finger protein 715 (Zfp715), mRNA.                                                            |
| 2750528 | 0.04330814  | up | 1.4048542 | U2af2         | 22185  | Mus musculus U2 small nuclear ribonucleoprotein auxiliary factor (U2AF) 2 (U2af2), mRNA.                        |
| 3780291 | 0.020921338 | up | 1.4048358 | Pkm2          | 18746  | Mus musculus pyruvate kinase, muscle (Pkm2), mRNA.                                                              |
| 2600133 | 0.020921338 | up | 1.4039545 | Lcp2          | 16822  | Mus musculus lymphocyte cytosolic protein 2 (Lcp2), mRNA.                                                       |
| 6420632 | 0.020921338 | up | 1.4036467 | Armcd7        | 276905 | Mus musculus armadillo repeat containing 7 (Armcd7), mRNA.                                                      |
| 580463  | 0.04330814  | up | 1.4035715 | Fam178a       | 226151 | Mus musculus family with sequence similarity 178, member A (Fam178a), mRNA.                                     |
| 2260059 | 0.020921338 | up | 1.4019265 | Bmp7          | 12162  | Mus musculus bone morphogenetic protein 7 (Bmp7), mRNA.                                                         |
| 730458  | 0.020921338 | up | 1.4018531 | Sep-09        | 53860  | Mus musculus septin 9 (Sept9), mRNA.                                                                            |
| 2370414 | 0.020921338 | up | 1.4014198 | Bap1          |        |                                                                                                                 |
| 3120523 | 0.020921338 | up | 1.4007564 | Zfp119        | 104349 | Mus musculus zinc finger protein 119 (Zfp119), mRNA.                                                            |
| 1170110 | 0.04330814  | up | 1.4002708 | Sp100         | 20684  | Mus musculus nuclear antigen Sp100 (Sp100), mRNA.                                                               |
| 2490646 | 0.04330814  | up | 1.4002452 | Frap1         | 56717  | Mus musculus FK506 binding protein 12-rapamycin associated protein 1 (Frap1), mRNA.                             |
| 5960189 | 0.04330814  | up | 1.3992603 | Blm           | 12144  | Mus musculus Bloom syndrome homolog (human) (Blm), transcript variant 2, mRNA.                                  |
| 5570497 | 0.020921338 | up | 1.3992282 | Aes           | 14797  | Mus musculus amino-terminal enhancer of split (Aes), mRNA.                                                      |
| 3990270 | 0.04330814  | up | 1.3987552 | Rad1          | 19355  | Mus musculus RAD1 homolog ( <i>S. pombe</i> ) (Rad1), mRNA.                                                     |
| 2510392 | 0.020921338 | up | 1.3986223 | Jak3          | 16453  | Mus musculus Janus kinase 3 (Jak3), mRNA.                                                                       |
| 240450  | 0.020921338 | up | 1.397017  | Hist2h2ac     | 319176 | Mus musculus histone cluster 2, H2ac (Hist2h2ac), mRNA.                                                         |
| 6250370 | 0.020921338 | up | 1.3965    | 2410016O06Rik | 71952  | Mus musculus RIKEN cDNA 2410016O06 gene (2410016O06Rik), mRNA.                                                  |
| 2000370 | 0.04330814  | up | 1.3956032 | Cc2d1b        | 319965 | Mus musculus coiled-coil and C2 domain containing 1B (Cc2d1b), mRNA.                                            |
| 6100110 | 0.020921338 | up | 1.3952472 | Man1b1        | 227619 | Mus musculus mannosidase, alpha, class 1B, member 1 (Man1b1), mRNA.                                             |

|         |             |    |           |               |        |                                                                                                                                 |
|---------|-------------|----|-----------|---------------|--------|---------------------------------------------------------------------------------------------------------------------------------|
| 5670082 | 0.04330814  | up | 1.394702  | Mmd           | 67468  | Mus musculus monocyte to macrophage differentiation-associated (Mmd), mRNA.                                                     |
| 5700142 | 0.020921338 | up | 1.394088  | Nr1h2         | 22260  | Mus musculus nuclear receptor subfamily 1, group H, member 2 (Nr1h2), mRNA.                                                     |
| 2230184 | 0.020921338 | up | 1.3938153 | Rab43         | 69834  | Mus musculus RAB43, member RAS oncogene family (Rab43), transcript variant 2, mRNA.                                             |
| 2260370 | 0.020921338 | up | 1.392281  | Ttl11         | 74410  | Mus musculus tubulin tyrosine ligase-like family, member 11 (Ttl11), mRNA.                                                      |
| 1010168 | 0.04330814  | up | 1.3916382 | Dnase1l2      | 66705  | Mus musculus deoxyribonuclease 1-like 2 (Dnase1l2), mRNA.                                                                       |
| 4780193 | 0.020921338 | up | 1.3908083 | Aspm          | 12316  | Mus musculus asp (abnormal spindle)-like, microcephaly associated (Drosophila) (Aspm), mRNA.                                    |
| 7560373 | 0.020921338 | up | 1.3891776 | Rad54l        | 19366  | Mus musculus RAD54 like (S. cerevisiae) (Rad54l), mRNA.                                                                         |
| 4860315 | 0.04330814  | up | 1.3885769 | Arhgap1       | 228359 | Mus musculus Rho GTPase activating protein 1 (Arhgap1), mRNA.                                                                   |
| 4200471 | 0.04330814  | up | 1.3881207 | Phf12         | 268448 | Mus musculus PHD finger protein 12 (Phf12), mRNA.                                                                               |
| 6350367 | 0.020921338 | up | 1.387123  | 3000004C01Rik | 70218  | Mus musculus RIKEN cDNA 3000004C01 gene (3000004C01Rik), mRNA.                                                                  |
| 380220  | 0.020921338 | up | 1.3850472 | Cln6          | 76524  | Mus musculus ceroid-lipofuscinosis, neuronal 6 (Cln6), mRNA.                                                                    |
| 6370270 | 0.020921338 | up | 1.3845195 | Abhd4         | 105501 | Mus musculus abhydrolase domain containing 4 (Abhd4), mRNA.                                                                     |
| 4290403 | 0.020921338 | up | 1.384208  | Zeb1          | 21417  | Mus musculus zinc finger E-box binding homeobox 1 (Zeb1), mRNA.                                                                 |
| 3460037 | 0.020921338 | up | 1.3841782 | Fen1          | 14156  | Mus musculus flap structure specific endonuclease 1 (Fen1), mRNA.                                                               |
| 4250138 | 0.020921338 | up | 1.3839782 | Pold3         | 67967  | Mus musculus polymerase (DNA-directed), delta 3, accessory subunit (Pold3), mRNA.                                               |
| 7000356 | 0.020921338 | up | 1.3838981 | Tcf25         | 66855  | Mus musculus transcription factor 25 (basic helix-loop-helix) (Tcf25), transcript variant 3, mRNA.                              |
| 1850661 | 0.04330814  | up | 1.3837053 | Zcchc3        | 67917  | Mus musculus zinc finger, CCHC domain containing 3 (Zcchc3), mRNA.                                                              |
| 2320709 | 0.020921338 | up | 1.383045  | Dgcr8         | 94223  | Mus musculus DiGeorge syndrome critical region gene 8 (Dgcr8), mRNA.                                                            |
| 5340138 | 0.020921338 | up | 1.3828397 | Fgf13         | 14168  | Mus musculus fibroblast growth factor 13 (Fgf13), mRNA. XM_919159                                                               |
| 4670121 | 0.020921338 | up | 1.3825972 | Nckipsd       | 80987  | Mus musculus NCK interacting protein with SH3 domain (Nckipsd), mRNA.                                                           |
| 7050274 | 0.020921338 | up | 1.3824182 | Acly          | 104112 | Mus musculus ATP citrate lyase (Acly), mRNA.                                                                                    |
| 2120097 | 0.020921338 | up | 1.3819219 | Nr2c1         | 22025  | Mus musculus nuclear receptor subfamily 2, group C, member 1 (Nr2c1), mRNA.                                                     |
| 1740615 | 0.020921338 | up | 1.3819197 | Tmed1         | 17083  | Mus musculus transmembrane emp24 domain containing 1 (Tmed1), mRNA.                                                             |
| 1030044 | 0.020921338 | up | 1.3810722 | Smarcd3       | 66993  | Mus musculus SWI/SNF related, matrix associated, actin dependent regulator of chromatin, subfamily d, member 3 (Smarcd3), mRNA. |
| 1070139 | 0.020921338 | up | 1.380746  | Plrg1         | 53317  | Mus musculus pleiotropic regulator 1, PRL1 homolog (Arabidopsis) (Plrg1), mRNA.                                                 |
| 7400519 | 0.020921338 | up | 1.3804822 | Pdrg1         | 68559  | Mus musculus p53 and DNA damage regulated 1 (Pdrg1), mRNA.                                                                      |
| 3120576 | 0.04330814  | up | 1.379973  | Arpc1b        | 11867  | Mus musculus actin related protein 2/3 complex, subunit 1B (Arpc1b), mRNA.                                                      |
| 4560673 | 0.020921338 | up | 1.3793122 | 2510002A14Rik |        |                                                                                                                                 |
| 130563  | 0.020921338 | up | 1.3782904 | Ubx8          | 76577  | Mus musculus UBX domain containing 8 (Ubx8), mRNA.                                                                              |
| 6650632 | 0.020921338 | up | 1.3782881 | AI846148      | 68229  | Mus musculus expressed sequence AI846148 (AI846148), mRNA.                                                                      |
| 4670634 | 0.020921338 | up | 1.3781055 | Isyna1        | 71780  | Mus musculus myo-inositol 1-phosphate synthase A1 (Isyna1), mRNA.                                                               |
| 5130438 | 0.04330814  | up | 1.3779125 | Arhgap27      | 544817 | Mus musculus Rho GTPase activating protein 27 (Arhgap27), transcript variant 1, mRNA.                                           |
| 5810564 | 0.020921338 | up | 1.3775501 | Scamp3        |        |                                                                                                                                 |
| 870408  | 0.04330814  | up | 1.3772929 | 1110039B18Rik | 68796  | Mus musculus RIKEN cDNA 1110039B18 gene (1110039B18Rik), mRNA.                                                                  |
| 2760255 | 0.04330814  | up | 1.3771297 | Rpa3          | 68240  | Mus musculus replication protein A3 (Rpa3), mRNA.                                                                               |
| 5490452 | 0.020921338 | up | 1.3764789 | Galnt2        | 108148 | Mus musculus UDP-N-acetyl-alpha-D-galactosamine:polypeptide N-acetylgalactosaminyltransferase 2 (Galnt2), mRNA.                 |
| 1770427 | 0.04330814  | up | 1.3761111 | Ralgds        | 19730  | Mus musculus ral guanine nucleotide dissociation stimulator (Ralgds), mRNA.                                                     |
| 1710451 | 0.04330814  | up | 1.3757057 | Nat2          | 17961  | Mus musculus N-acetyltransferase 2 (arylamine N-acetyltransferase) (Nat2), mRNA.                                                |
| 4060520 | 0.020921338 | up | 1.3750529 | Kns2          | 16593  | Mus musculus kinesin 2 (Kns2), transcript variant d, mRNA.                                                                      |
| 1170113 | 0.020921338 | up | 1.3743402 | Nf1           |        |                                                                                                                                 |
| 1710546 | 0.020921338 | up | 1.3736318 | Gga3          | 260302 | Mus musculus golgi associated, gamma adaptin ear containing, ARF binding protein 3 (Gga3), mRNA.                                |
| 7330392 | 0.020921338 | up | 1.3729501 | Plekho2       | 102595 | Mus musculus pleckstrin homology domain containing, family O member 2 (Plekho2), mRNA.                                          |
| 2760673 | 0.020921338 | up | 1.3728848 | 1600012H06Rik | 67912  | Mus musculus RIKEN cDNA 1600012H06 gene (1600012H06Rik), mRNA.                                                                  |
| 3140670 | 0.020921338 | up | 1.3722938 | Coq5          | 52064  | Mus musculus coenzyme Q5 homolog, methyltransferase (yeast) (Coq5), mRNA.                                                       |
| 4880196 | 0.020921338 | up | 1.3721834 | Tbc1d25       | 209815 | Mus musculus TBC1 domain family, member 25 (Tbc1d25), mRNA.                                                                     |
| 6960164 | 0.04330814  | up | 1.3718393 | LOC216963     |        |                                                                                                                                 |
| 4590593 | 0.04330814  | up | 1.3714392 | Ndst1         | 15531  | Mus musculus N-deacetylase/N-sulfotransferase (heparan glucosaminyl) 1 (Ndst1), mRNA.                                           |
| 610377  | 0.020921338 | up | 1.3711375 | Rpe           | 66646  | Mus musculus ribulose-5-phosphate-3-epimerase (Rpe), mRNA.                                                                      |
| 6200367 | 0.020921338 | up | 1.3710288 | Ncaph         | 215387 | Mus musculus non-SMC condensin I complex, subunit H (Ncaph), mRNA.                                                              |
| 5220477 | 0.020921338 | up | 1.3703429 | Fmo5          | 14263  | Mus musculus flavin containing monooxygenase 5 (Fmo5), mRNA.                                                                    |
| 3180424 | 0.04330814  | up | 1.3700616 | Nfkbil2       | 72749  | Mus musculus nuclear factor of kappa light polypeptide gene enhancer in B-cells inhibitor-like 2 (Nfkbil2), mRNA.               |
| 610040  | 0.04330814  | up | 1.3693404 | Med24         | 23989  | Mus musculus mediator complex subunit 24 (Med24), mRNA.                                                                         |



|         |             |    |           |               |           |                                                                                                              |
|---------|-------------|----|-----------|---------------|-----------|--------------------------------------------------------------------------------------------------------------|
| 7320703 | 0.020921338 | up | 1.368567  | Kcnk6         | 52150     | Mus musculus potassium inwardly-rectifying channel, subfamily K, member 6 (Kcnk6), mRNA.                     |
| 1580528 | 0.04330814  | up | 1.3682516 | Usp18         | 24110     | Mus musculus ubiquitin specific peptidase 18 (Usp18), mRNA.                                                  |
| 2750543 | 0.04330814  | up | 1.3680786 | Gpr18         | 110168    | Mus musculus G protein-coupled receptor 18 (Gpr18), mRNA.                                                    |
| 1690187 | 0.04330814  | up | 1.3653347 | Ly6a          | 110454    | Mus musculus lymphocyte antigen 6 complex, locus A (Ly6a), mRNA.                                             |
| 6660445 | 0.020921338 | up | 1.3649915 | Xylt2         | 217119    | Mus musculus xylosyltransferase II (Xylt2), mRNA.                                                            |
| 70091   | 0.020921338 | up | 1.3648124 | Spg7          | 234847    | Mus musculus spastic paraplegia 7 homolog (human) (Spg7), nuclear gene encoding mitochondrial protein, mRNA. |
| 5090739 | 0.020921338 | up | 1.364804  | Clec16a       | 74374     | Mus musculus C-type lectin domain family 16, member A (Clec16a), mRNA.                                       |
| 2450706 | 0.020921338 | up | 1.3644882 | Gnal1         | 14670     | Mus musculus guanine nucleotide binding protein-like 1 (Gnal1), mRNA.                                        |
| 4540349 | 0.020921338 | up | 1.3642833 | Atp13a1       | 170759    | Mus musculus ATPase type 13A1 (Atp13a1), mRNA.                                                               |
| 5220181 | 0.020921338 | up | 1.363729  | Eya3          | 14050     | Mus musculus eyes absent 3 homolog (Drosophila) (Eya3), transcript variant 2, mRNA.                          |
| 7400195 | 0.020921338 | up | 1.3633993 | A930008G19Rik | 77938     | Mus musculus RIKEN cDNA A930008G19 gene (A930008G19Rik), mRNA.                                               |
| 240035  | 0.020921338 | up | 1.3627353 | Ccar1         |           |                                                                                                              |
| 4850086 | 0.020921338 | up | 1.3625818 | Jak3          | 16453     | Mus musculus Janus kinase 3 (Jak3), mRNA.                                                                    |
| 4900541 | 0.04330814  | up | 1.3623234 | Dcp1a         | 75901     | Mus musculus decapping enzyme (Dcp1a), mRNA.                                                                 |
| 6130167 | 0.020921338 | up | 1.3619378 | Ubqln4        | 94232     | Mus musculus ubiquilin 4 (Ubqln4), mRNA.                                                                     |
| 6370592 | 0.04330814  | up | 1.3614086 | LOC100044087  | 100044087 | PREDICTED: Mus musculus similar to brain protein 44 (LOC100044087), misc RNA.                                |
| 2760202 | 0.020164572 | up | 1.3610574 | Wdr51b        | 382406    | Mus musculus WD repeat domain 51B (Wdr51b), mRNA.                                                            |
| 5270398 | 0.020921338 | up | 1.3602729 | Ifit2         | 15958     | Mus musculus interferon-induced protein with tetratricopeptide repeats 2 (Ifit2), mRNA.                      |
| 4890022 | 0.04330814  | up | 1.3599216 | Ttc3          | 22129     | Mus musculus tetratricopeptide repeat domain 3 (Ttc3), mRNA.                                                 |
| 6840156 | 0.020921338 | up | 1.3592663 | Sreb1         | 20787     | Mus musculus sterol regulatory element binding factor 1 (Sreb1), mRNA.                                       |
| 3400598 | 0.04330814  | up | 1.3587974 | Zfp235        | 56525     | Mus musculus zinc finger protein 235 (Zfp235), mRNA.                                                         |
| 830315  | 0.020921338 | up | 1.3586292 | Ncdn          | 26562     | Mus musculus neurochondrin (Ncdn), mRNA.                                                                     |
| 6330615 | 0.020921338 | up | 1.3585318 | Ddx20         | 53975     | Mus musculus DEAD (Asp-Glu-Ala-Asp) box polypeptide 20 (Ddx20), mRNA.                                        |
| 6020327 | 0.020921338 | up | 1.3580567 | Plekhg5       | 269608    | Mus musculus pleckstrin homology domain containing, family G (with RhoGef domain) member 5 (Plekhg5), mRNA.  |
| 380520  | 0.020921338 | up | 1.3574047 | Aurka         | 20878     | Mus musculus aurora kinase A (Aurka), mRNA.                                                                  |
| 2100598 | 0.04330814  | up | 1.3572401 | Btb1          | 83962     | Mus musculus BTB (POZ) domain containing 1 (Btb1), mRNA.                                                     |
| 6130739 | 0.020921338 | up | 1.3570654 | 9130404D08Rik | 74549     | Mus musculus RIKEN cDNA 9130404D08 gene (9130404D08Rik), mRNA.                                               |
| 4220504 | 0.020921338 | up | 1.3567426 | L3mbtl2       | 214669    | Mus musculus l(3)mbt-like 2 (Drosophila) (L3mbtl2), mRNA.                                                    |
| 7320280 | 0.020921338 | up | 1.3565763 | Zfp60         | 22718     | Mus musculus zinc finger protein 60 (Zfp60), transcript variant 2, mRNA.                                     |
| 5390326 | 0.04330814  | up | 1.3565439 | 2810021J22Rik | 69944     | Mus musculus RIKEN cDNA 2810021J22 gene (2810021J22Rik), mRNA.                                               |
| 5860717 | 0.04330814  | up | 1.3562638 | Jdp2          | 81703     | Mus musculus Jun dimerization protein 2 (Jdp2), mRNA.                                                        |
| 4880148 | 0.04330814  | up | 1.3561101 | Atp9b         | 50771     | Mus musculus ATPase, class II, type 9B (Atp9b), mRNA.                                                        |
| 380670  | 0.020921338 | up | 1.3543986 | AI467606      | 101602    | Mus musculus expressed sequence AI467606 (AI467606), mRNA.                                                   |
| 1340736 | 0.020921338 | up | 1.3539939 | Eif4g1        | 208643    | Mus musculus eukaryotic translation initiation factor 4, gamma 1 (Eif4g1), transcript variant 1, mRNA.       |
| 3870438 | 0.020921338 | up | 1.3537912 | Gtbp6         | 107999    | Mus musculus GTP binding protein 6 (putative) (Gtbp6), mRNA.                                                 |
| 2190047 | 0.020921338 | up | 1.3535205 | Hsp90ab1      | 15516     | Mus musculus heat shock protein 90kDa alpha (cytosolic), class B member 1 (Hsp90ab1), mRNA.                  |
| 610154  | 0.04330814  | up | 1.353289  | Rab3a         | 19339     | Mus musculus RAB3A, member RAS oncogene family (Rab3a), mRNA.                                                |
| 1690521 | 0.020921338 | up | 1.3527083 | Sorcs2        | 81840     | Mus musculus sortilin-related VPS10 domain containing receptor 2 (Sorcs2), mRNA.                             |
| 5700703 | 0.04330814  | up | 1.3522881 | Snrpb         | 20638     | Mus musculus small nuclear ribonucleoprotein B (Snrpb), mRNA.                                                |
| 4810307 | 0.020921338 | up | 1.3509889 | Zfyve16       | 218441    | Mus musculus zinc finger, FYVE domain containing 16 (Zfyve16), mRNA.                                         |
| 670242  | 0.020921338 | up | 1.3501936 | Gpaa1         | 14731     | Mus musculus GPI anchor attachment protein 1 (Gpaa1), mRNA.                                                  |
| 5870372 | 0.020921338 | up | 1.3500829 | Nek3          | 23954     | Mus musculus NIMA (never in mitosis gene a)-related expressed kinase 3 (Nek3), mRNA.                         |
| 6130328 | 0.020921338 | up | 1.3494012 | Plscr1        | 22038     | Mus musculus phospholipid scramblase 1 (Plscr1), mRNA.                                                       |
| 2260373 | 0.04330814  | up | 1.3492954 | Arfgap1       | 228998    | Mus musculus ADP-ribosylation factor GTPase activating protein 1 (Arfgap1), mRNA.                            |
| 3850463 | 0.020921338 | up | 1.3492478 | Traf1         | 22029     | Mus musculus Tnf receptor-associated factor 1 (Traf1), mRNA.                                                 |
| 840484  | 0.020921338 | up | 1.3478737 | 4933421E11Rik | 321000    | Mus musculus RIKEN cDNA 4933421E11 gene (4933421E11Rik), transcript variant 2, mRNA.                         |
| 3140608 | 0.020921338 | up | 1.3465207 | Zbtb24        | 268294    | Mus musculus zinc finger and BTB domain containing 24 (Zbtb24), mRNA.                                        |
| 3140382 | 0.020921338 | up | 1.3463901 | Nr2f6         | 13864     | Mus musculus nuclear receptor subfamily 2, group F, member 6 (Nr2f6), mRNA.                                  |
| 6590653 | 0.020921338 | up | 1.3450866 | Irf7          | 54123     | Mus musculus interferon regulatory factor 7 (Irf7), mRNA.                                                    |
| 7560452 | 0.020921338 | up | 1.344721  | Nck1          | 17973     | Mus musculus non-catalytic region of tyrosine kinase adaptor protein 1 (Nck1), mRNA.                         |
| 1660424 | 0.04330814  | up | 1.3446245 | Psd4          | 215632    | Mus musculus pleckstrin and Sec7 domain containing 4 (Psd4), mRNA.                                           |
| 580465  | 0.04330814  | up | 1.3443977 | LOC100046855  | 100046855 | PREDICTED: Mus musculus similar to BKLF (LOC100046855), mRNA.                                                |
| 7610564 | 0.04330814  | up | 1.3443497 | Aaas          | 223921    | Mus musculus achalasia, adrenocortical insufficiency, alacrimia (Aaas), mRNA.                                |

|         |             |    |           |               |        |                                                                                                               |
|---------|-------------|----|-----------|---------------|--------|---------------------------------------------------------------------------------------------------------------|
| 1690706 | 0.04330814  | up | 1.3436432 | Ehmt2         | 110147 | Mus musculus euchromatic histone lysine N-methyltransferase 2 (Ehmt2), transcript variant short, mRNA.        |
| 2370630 | 0.020921338 | up | 1.3436005 | 2610204M08Rik | 70435  | Mus musculus RIKEN cDNA 2610204M08 gene (2610204M08Rik), mRNA.                                                |
| 1260241 | 0.04330814  | up | 1.3435925 | Pi4ka         | 224020 | Mus musculus phosphatidylinositol 4-kinase, catalytic, alpha polypeptide (Pi4ka), mRNA.                       |
| 6560270 | 0.04330814  | up | 1.3433996 | Slc31a2       |        |                                                                                                               |
| 2900497 | 0.020921338 | up | 1.3429431 | Pik3r2        | 18709  | Mus musculus phosphatidylinositol 3-kinase, regulatory subunit, polypeptide 2 (p85 beta) (Pik3r2), mRNA.      |
| 2060152 | 0.020921338 | up | 1.3428962 | Nedd1         | 17997  | Mus musculus neural precursor cell expressed, developmentally down-regulated gene 1 (Nedd1), mRNA.            |
| 5670687 | 0.020921338 | up | 1.3426657 | Gpr65         | 14744  | Mus musculus G-protein coupled receptor 65 (Gpr65), mRNA.                                                     |
| 670202  | 0.020921338 | up | 1.3424088 | Rad17         | 19356  | Mus musculus RAD17 homolog (S. pombe) (Rad17), transcript variant 2, mRNA.                                    |
| 4490204 | 0.020921338 | up | 1.342363  | Stau1         | 20853  | Mus musculus staufen (RNA binding protein) homolog 1 (Drosophila) (Stau1), mRNA.                              |
| 10259   | 0.020921338 | up | 1.3420231 | Ppp1r16a      | 73062  | Mus musculus protein phosphatase 1, regulatory (inhibitor) subunit 16A (Ppp1r16a), mRNA.                      |
| 2350228 | 0.04330814  | up | 1.3417015 | LOC237408     |        |                                                                                                               |
| 2320369 | 0.020921338 | up | 1.3411881 | C430003P19Rik | 109359 | Mus musculus RIKEN cDNA C430003P19 gene (C430003P19Rik), mRNA.                                                |
| 3370309 | 0.020921338 | up | 1.3411546 | Mobkl2a       | 208228 | Mus musculus MOB1, Mps One Binder kinase activator-like 2A (yeast) (Mobkl2a), mRNA. XM_618785 XM_923737       |
| 5960487 | 0.020921338 | up | 1.3407918 | Rassf2        | 215653 | Mus musculus Ras association (RalGDS/AF-6) domain family member 2 (Rassf2), mRNA.                             |
| 4210022 | 0.020921338 | up | 1.3405554 | BC038822      | 239647 | Mus musculus cDNA sequence BC038822 (BC038822), mRNA.                                                         |
| 3180133 | 0.020921338 | up | 1.3404528 | Ppp2r5d       | 21770  | Mus musculus protein phosphatase 2, regulatory subunit B (B56), delta isoform (Ppp2r5d), mRNA.                |
| 50286   | 0.04330814  | up | 1.3404384 | Dgka          | 13139  | Mus musculus diacylglycerol kinase, alpha (Dgka), mRNA.                                                       |
| 6220037 | 0.020921338 | up | 1.340431  | Sbno2         | 216161 | Mus musculus strawberry notch homolog 2 (Drosophila) (Sbno2), mRNA.                                           |
| 730300  | 0.020921338 | up | 1.3401451 | 2810403A07Rik | 74200  | Mus musculus RIKEN cDNA 2810403A07 gene (2810403A07Rik), mRNA.                                                |
| 1470209 | 0.020921338 | up | 1.3401226 | Snrpb         | 20638  | Mus musculus small nuclear ribonucleoprotein B (Snrpb), mRNA.                                                 |
| 1510241 | 0.020921338 | up | 1.3399217 | BC067068      | 216292 | Mus musculus cDNA sequence BC067068 (BC067068), mRNA.                                                         |
| 4150056 | 0.04330814  | up | 1.3393801 | Ppp4r1        | 70351  | Mus musculus protein phosphatase 4, regulatory subunit 1 (Ppp4r1), mRNA.                                      |
| 2230612 | 0.020921338 | up | 1.3392966 | Tyw1          | 100929 | Mus musculus tRNA-yW synthesizing protein 1 homolog (S. cerevisiae) (Tyw1), transcript variant 1, mRNA.       |
| 1300546 | 0.04330814  | up | 1.3391844 | Rai1          | 19377  | Mus musculus retinoic acid induced 1 (Rai1), transcript variant 1, mRNA.                                      |
| 2970296 | 0.04330814  | up | 1.339038  | Abca2         | 11305  | Mus musculus ATP-binding cassette, sub-family A (ABC1), member 2 (Abca2), mRNA.                               |
| 4070136 | 0.04330814  | up | 1.338998  | Dgkz          | 104418 | Mus musculus diacylglycerol kinase zeta (Dgkz), mRNA.                                                         |
| 940504  | 0.04330814  | up | 1.3388516 | Cd22          | 12483  | Mus musculus CD22 antigen (Cd22), transcript variant 2, mRNA.                                                 |
| 1240730 | 0.04330814  | up | 1.3383169 | Atxn2l        | 233871 | Mus musculus ataxin 2-like (Atxn2l), mRNA.                                                                    |
| 460731  | 0.020921338 | up | 1.3381103 | Adap1         | 231821 | Mus musculus ArfGAP with dual PH domains 1 (Adap1), mRNA.                                                     |
| 6420750 | 0.020921338 | up | 1.3376685 | Sall2         | 50524  | Mus musculus sal-like 2 (Drosophila) (Sall2), mRNA.                                                           |
| 6760274 | 0.020921338 | up | 1.3375233 | Aym1          | 503692 | Mus musculus activator of yeast meiotic promoters 1 (Aym1), mRNA.                                             |
| 1010332 | 0.020921338 | up | 1.3365796 | Znrd1         | 66136  | Mus musculus zinc ribbon domain containing, 1 (Znrd1), mRNA.                                                  |
| 7000386 | 0.04330814  | up | 1.3360168 | Zfp598        | 213753 | Mus musculus zinc finger protein 598 (Zfp598), mRNA.                                                          |
| 7570196 | 0.04330814  | up | 1.3358923 | Trim59        | 66949  | Mus musculus tripartite motif-containing 59 (Trim59), mRNA.                                                   |
| 4890689 | 0.04330814  | up | 1.3354477 | Oas3          | 246727 | Mus musculus 2'-5' oligoadenylate synthetase 3 (Oas3), mRNA.                                                  |
| 1470386 | 0.020921338 | up | 1.3348333 | Asah3l        | 230379 | Mus musculus N-acylsphingosine amidohydrolase 3-like (Asah3l), mRNA.                                          |
| 2190390 | 0.04330814  | up | 1.334765  | Nol1          | 110109 | Mus musculus nucleolar protein 1 (Nol1), mRNA.                                                                |
| 5270731 | 0.04330814  | up | 1.334747  | Trp53bp1      | 27223  | Mus musculus transformation related protein 53 binding protein 1 (Trp53bp1), mRNA.                            |
| 6290253 | 0.04330814  | up | 1.3345759 | Wdr8          |        |                                                                                                               |
| 830215  | 0.04330814  | up | 1.334333  | Sh2b1         | 20399  | Mus musculus SH2B adaptor protein 1 (Sh2b1), transcript variant 2, mRNA.                                      |
| 7560097 | 0.020921338 | up | 1.3336415 | Narg2         | 93697  | Mus musculus NMDA receptor-regulated gene 2 (Narg2), mRNA.                                                    |
| 4060564 | 0.020921338 | up | 1.3325369 | Gba2          | 230101 | Mus musculus glucosidase beta 2 (Gba2), mRNA.                                                                 |
| 7040546 | 0.020921338 | up | 1.3324738 | Gm962         | 381201 | Mus musculus gene model 962, (NCBI) (Gm962), mRNA.                                                            |
| 1110102 | 0.020921338 | up | 1.3317574 | Actn4         | 60595  | Mus musculus actinin alpha 4 (Actn4), mRNA.                                                                   |
| 7510356 | 0.04330814  | up | 1.3317391 | Insig2        | 72999  | Mus musculus insulin induced gene 2 (Insig2), mRNA.                                                           |
| 520086  | 0.020921338 | up | 1.3315182 | Nucb1         | 18220  | Mus musculus nucleobindin 1 (Nucb1), mRNA.                                                                    |
| 610113  | 0.04330814  | up | 1.331409  | Dgcr2         | 13356  | Mus musculus DiGeorge syndrome critical region gene 2 (Dgcr2), mRNA.                                          |
| 1690670 | 0.020921338 | up | 1.3310465 | Mrpl37        | 56280  | Mus musculus mitochondrial ribosomal protein L37 (Mrpl37), nuclear gene encoding mitochondrial protein, mRNA. |
| 5720576 | 0.04330814  | up | 1.3309088 | Gna11         |        |                                                                                                               |
| 5690192 | 0.04330814  | up | 1.3302933 | A630077B13Rik | 215900 | Mus musculus RIKEN cDNA A630077B13 gene (A630077B13Rik), mRNA.                                                |
| 1780719 | 0.020921338 | up | 1.3294913 | Gtse1         | 29870  | Mus musculus G two S phase expressed protein 1 (Gtse1), mRNA.                                                 |
| 3460369 | 0.04330814  | up | 1.3288326 | Klc2          | 16594  | Mus musculus kinesin light chain 2 (Klc2), mRNA.                                                              |
| 510059  | 0.020921338 | up | 1.3284035 | Fryl          | 72313  | Mus musculus furry homolog-like (Drosophila) (Fryl), transcript variant 1, mRNA.                              |
| 3170010 | 0.020921338 | up | 1.3283802 | Lman1         | 70361  | Mus musculus lectin, mannose-binding, 1 (Lman1), mRNA.                                                        |

|         |             |    |           |               |        |                                                                                                                              |
|---------|-------------|----|-----------|---------------|--------|------------------------------------------------------------------------------------------------------------------------------|
| 4830487 | 0.020921338 | up | 1.3282398 | Gab3          | 210710 | Mus musculus growth factor receptor bound protein 2-associated protein 3 (Gab3), mRNA.                                       |
| 3130215 | 0.020921338 | up | 1.3282398 | Kdelc1        | 72050  | Mus musculus KDEL (Lys-Asp-Glu-Leu) containing 1 (Kdelc1), mRNA.                                                             |
| 2970121 | 0.04330814  | up | 1.3280203 | Pear1         | 73182  | Mus musculus platelet endothelial aggregation receptor 1 (Pear1), transcript variant 4, mRNA.                                |
| 4490215 | 0.04330814  | up | 1.3279744 | Fbxo38        | 107035 | Mus musculus F-box protein 38 (Fbxo38), mRNA.                                                                                |
| 110220  | 0.020921338 | up | 1.3273549 | Phlpp         | 98432  | PREDICTED: Mus musculus PH domain and leucine rich repeat protein phosphatase, transcript variant 1 (Phlpp), mRNA.           |
| 1510408 | 0.020921338 | up | 1.3267381 | Sart1         | 20227  | Mus musculus squamous cell carcinoma antigen recognized by T-cells 1 (Sart1), mRNA.                                          |
| 7210440 | 0.020921338 | up | 1.3266927 | Mllt11        | 56772  | Mus musculus myeloid/lymphoid or mixed-lineage leukemia (trithorax homolog, Drosophila); translocated to, 11 (Mllt11), mRNA. |
| 4060240 | 0.020921338 | up | 1.3251052 | Ptpn6         | 15170  | Mus musculus protein tyrosine phosphatase, non-receptor type 6 (Ptpn6), transcript variant 2, mRNA.                          |
| 4540739 | 0.04330814  | up | 1.3250678 | Ccdc125       | 76041  | Mus musculus coiled-coil domain containing 125 (Ccdc125), mRNA.                                                              |
| 290292  | 0.020921338 | up | 1.3246837 | Top3a         | 21975  | Mus musculus topoisomerase (DNA) III alpha (Top3a), mRNA.                                                                    |
| 990438  | 0.04330814  | up | 1.3242828 | Cot11         | 72042  | Mus musculus coactosin-like 1 (Dictyostelium) (Cot11), mRNA.                                                                 |
| 6270022 | 0.04330814  | up | 1.3241591 | Osbp12        | 228983 | Mus musculus oxysterol binding protein-like 2 (Osbp12), mRNA.                                                                |
| 1070309 | 0.020921338 | up | 1.3236421 | Saps1         | 243819 | Mus musculus SAPS domain family, member 1 (Saps1), mRNA.                                                                     |
| 7100326 | 0.020921338 | up | 1.3233663 | Smad5         | 17129  | Mus musculus MAD homolog 5 (Drosophila) (Smad5), mRNA.                                                                       |
| 60056   | 0.020921338 | up | 1.3227082 | Rnf185        | 193670 | Mus musculus ring finger protein 185 (Rnf185), mRNA.                                                                         |
| 2450470 | 0.04330814  | up | 1.3226855 | Txlna         | 109658 | Mus musculus taxilin alpha (Txlna), mRNA.                                                                                    |
| 6450390 | 0.020921338 | up | 1.3226818 | Cd151         |        |                                                                                                                              |
| 730546  | 0.020921338 | up | 1.32262   | Tex9          | 21778  | Mus musculus testis expressed gene 9 (Tex9), mRNA.                                                                           |
| 5490521 | 0.04330814  | up | 1.322247  | Nek9          | 217718 | Mus musculus NIMA (never in mitosis gene a)-related expressed kinase 9 (Nek9), mRNA.                                         |
| 3890202 | 0.020921338 | up | 1.3221074 | Trpc4ap       | 56407  | Mus musculus transient receptor potential cation channel, subfamily C, member 4 associated protein (Trpc4ap), mRNA.          |
| 5340767 | 0.020921338 | up | 1.3218435 | 2210012G02Rik | 66526  | Mus musculus RIKEN cDNA 2210012G02 gene (2210012G02Rik), mRNA.                                                               |
| 1770612 | 0.020921338 | up | 1.3217834 | Mcm2          | 17216  | Mus musculus minichromosome maintenance deficient 2 mitotin (S. cerevisiae) (Mcm2), mRNA.                                    |
| 1050400 | 0.020921338 | up | 1.3217305 | Esp11         | 105988 | Mus musculus extra spindle poles-like 1 (S. cerevisiae) (Esp11), mRNA.                                                       |
| 430333  | 0.020921338 | up | 1.3213768 | Ncapg2        | 76044  | Mus musculus non-SMC condensin II complex, subunit G2 (Ncapg2), mRNA.                                                        |
| 3060347 | 0.020921338 | up | 1.3210435 | Klc2          | 16594  | Mus musculus kinesin light chain 2 (Klc2), mRNA.                                                                             |
| 6940242 | 0.020921338 | up | 1.3202636 | Lrdd          | 57913  | Mus musculus leucine-rich and death domain containing (Lrdd), mRNA.                                                          |
| 4480292 | 0.020921338 | up | 1.3200085 | Rbmx          | 19655  | Mus musculus RNA binding motif protein, X chromosome (Rbmx), mRNA.                                                           |
| 2230068 | 0.020921338 | up | 1.319551  | Gaa           | 14387  | Mus musculus glucosidase, alpha, acid (Gaa), mRNA.                                                                           |
| 6250632 | 0.04330814  | up | 1.318978  | Mbtps1        | 56453  | Mus musculus membrane-bound transcription factor peptidase, site 1 (Mbtps1), mRNA.                                           |
| 6660608 | 0.020921338 | up | 1.3186598 | Ammecr1l      | 225339 | Mus musculus AMME chromosomal region gene 1-like (Ammecr1l), mRNA.                                                           |
| 5560066 | 0.04330814  | up | 1.3182673 | Stat4         | 20849  | Mus musculus signal transducer and activator of transcription 4 (Stat4), mRNA.                                               |
| 4040471 | 0.020921338 | up | 1.3180103 | Skp2          | 27401  | Mus musculus S-phase kinase-associated protein 2 (p45) (Skp2), transcript variant 2, mRNA.                                   |
| 5270131 | 0.04330814  | up | 1.31783   | Atp5sl        | 66349  | Mus musculus ATP5S-like (Atp5sl), mRNA.                                                                                      |
| 3190735 | 0.020921338 | up | 1.3175199 | Rab2a         | 59021  | Mus musculus RAB2A, member RAS oncogene family (Rab2a), mRNA.                                                                |
| 1050008 | 0.020921338 | up | 1.3171324 | Gga1          | 106039 | Mus musculus golgi associated, gamma adaptin ear containing, ARF binding protein 1 (Gga1), mRNA.                             |
| 1770201 | 0.04330814  | up | 1.3167182 | Serinc3       | 26943  | Mus musculus serine incorporator 3 (Serinc3), mRNA.                                                                          |
| 6560730 | 0.04330814  | up | 1.3165057 | Inpp5a        | 212111 | Mus musculus inositol polyphosphate-5-phosphatase A (Inpp5a), mRNA.                                                          |
| 7000475 | 0.04330814  | up | 1.3162963 | Gemin4        | 276919 | Mus musculus gem (nuclear organelle) associated protein 4 (Gemin4), mRNA.                                                    |
| 7380608 | 0.04330814  | up | 1.3162351 | 1600014C10Rik | 72244  | Mus musculus RIKEN cDNA 1600014C10 gene (1600014C10Rik), mRNA.                                                               |
| 6480494 | 0.020921338 | up | 1.316171  | Coro2b        | 235431 | Mus musculus coronin, actin binding protein, 2B (Coro2b), mRNA.                                                              |
| 5890139 | 0.04330814  | up | 1.3158513 | Pdk2          | 18604  | Mus musculus pyruvate dehydrogenase kinase, isoenzyme 2 (Pdk2), mRNA.                                                        |
| 7400086 | 0.020921338 | up | 1.3154987 | Parp2         | 11546  | Mus musculus poly (ADP-ribose) polymerase family, member 2 (Parp2), mRNA.                                                    |
| 1300017 | 0.020921338 | up | 1.3146527 | Sec14l1       | 74136  | Mus musculus SEC14-like 1 (S. cerevisiae) (Sec14l1), mRNA.                                                                   |
| 2760519 | 0.04330814  | up | 1.3144767 | LOC329575     | 329575 | Mus musculus hypothetical LOC329575 (LOC329575), mRNA.                                                                       |
| 4860609 | 0.04330814  | up | 1.313004  | Tmem8         | 60455  | Mus musculus transmembrane protein 8 (five membrane-spanning domains) (Tmem8), mRNA.                                         |
| 5570541 | 0.020921338 | up | 1.3128963 | 3300001P08Rik | 67684  | Mus musculus RIKEN cDNA 3300001P08 gene (3300001P08Rik), mRNA.                                                               |
| 2570577 | 0.020921338 | up | 1.3127137 | Nfatc1        | 18018  | Mus musculus nuclear factor of activated T-cells, cytoplasmic, calcineurin-dependent 1 (Nfatc1), transcript variant 1, mRNA. |
| 4230086 | 0.04330814  | up | 1.3124478 | Slc39a13      | 68427  | Mus musculus solute carrier family 39 (metal ion transporter), member 13 (Slc39a13), mRNA.                                   |
| 4640379 | 0.04330814  | up | 1.3123816 | Gga1          | 106039 | Mus musculus golgi associated, gamma adaptin ear containing, ARF binding protein 1 (Gga1), mRNA.                             |
| 6060189 | 0.020921338 | up | 1.3122331 | Ric8b         | 237422 | Mus musculus resistance to inhibitors of cholinesterase 8 homolog B (C. elegans) (Ric8b), transcript variant 2, mRNA.        |

|         |             |    |           |               |        |                                                                                                                          |
|---------|-------------|----|-----------|---------------|--------|--------------------------------------------------------------------------------------------------------------------------|
| 6130044 | 0.04330814  | up | 1.3119736 | Pear1         | 73182  | Mus musculus platelet endothelial aggregation receptor 1 (Pear1), transcript variant 1, mRNA.                            |
| 2070168 | 0.04330814  | up | 1.3113753 | Aldh16a1      | 69748  | Mus musculus aldehyde dehydrogenase 16 family, member A1 (Aldh16a1), mRNA.                                               |
| 5810170 | 0.04330814  | up | 1.3106368 | Ascc3l1       | 320632 | Mus musculus activating signal cointegrator 1 complex subunit 3-like 1 (Ascc3l1), mRNA.                                  |
| 290196  | 0.020921338 | up | 1.3100225 | Galnt9        | 231605 | Mus musculus UDP-N-acetyl-alpha-D-galactosamine:polypeptide N-acetylgalactosaminyltransferase 9 (Galnt9), mRNA.          |
| 780402  | 0.020921338 | up | 1.3090312 | Zc3h10        | 103284 | Mus musculus zinc finger CCH type containing 10 (Zc3h10), mRNA.                                                          |
| 3780270 | 0.020921338 | up | 1.308625  | BC043301      | 210104 | Mus musculus cDNA sequence BC043301 (BC043301), mRNA.                                                                    |
| 5870450 | 0.020921338 | up | 1.3084137 | Cova1         | 209224 | Mus musculus cytosolic ovarian carcinoma antigen 1 (Cova1), mRNA.                                                        |
| 3520274 | 0.020921338 | up | 1.3080026 | Usp1          | 231915 | Mus musculus ubiquitin specific peptidase like 1 (Usp1), mRNA.                                                           |
| 7160148 | 0.04330814  | up | 1.3077025 | Nono          | 53610  | Mus musculus non-POU-domain-containing, octamer binding protein (Nono), mRNA.                                            |
| 6380192 | 0.020921338 | up | 1.3074452 | Wwp2          | 66894  | Mus musculus WW domain containing E3 ubiquitin protein ligase 2 (Wwp2), mRNA.                                            |
| 430307  | 0.020921338 | up | 1.3071834 | Zfp219        | 69890  | Mus musculus zinc finger protein 219 (Zfp219), mRNA.                                                                     |
| 4640521 | 0.020921338 | up | 1.3069959 | Lnx2          | 140887 | Mus musculus ligand of numb-protein X 2 (Lnx2), mRNA.                                                                    |
| 4670022 | 0.020921338 | up | 1.3069414 | 2810439F02Rik | 72747  | Mus musculus RIKEN cDNA 2810439F02 gene (2810439F02Rik), mRNA.                                                           |
| 3520221 | 0.020921338 | up | 1.3067988 | Lxn           | 17035  | Mus musculus latexin (Lxn), mRNA.                                                                                        |
| 4200019 | 0.020921338 | up | 1.3067069 | Zfp825        | 235956 | Mus musculus zinc finger protein 825 (Zfp825), mRNA.                                                                     |
| 3800475 | 0.04330814  | up | 1.3066053 | Zfp97         | 22759  | Mus musculus zinc finger protein 97 (Zfp97), mRNA. XM_920229 XM_920242 XM_920250 XM_920259 XM_920268 XM_920278 XM_920286 |
| 6420215 | 0.020921338 | up | 1.3062923 | Gsg2          | 14841  | Mus musculus germ cell-specific gene 2 (Gsg2), mRNA.                                                                     |
| 6330736 | 0.04330814  | up | 1.3062356 | Ulk1          | 22241  | Mus musculus Unc-51 like kinase 1 (C. elegans) (Ulk1), mRNA.                                                             |
| 6180463 | 0.020921338 | up | 1.3060753 | Abr           | 109934 | Mus musculus active BCR-related gene (Abr), transcript variant 2, mRNA.                                                  |
| 2630356 | 0.04330814  | up | 1.304596  | Ddx41         | 72935  | Mus musculus DEAD (Asp-Glu-Ala-Asp) box polypeptide 41 (Ddx41), mRNA.                                                    |
| 3170154 | 0.04330814  | up | 1.3042145 | Cenpt         | 320394 | Mus musculus centromere protein T (Cenpt), mRNA.                                                                         |
| 5900487 | 0.020921338 | up | 1.3040979 | Lpar2         | 53978  | Mus musculus lysophosphatidic acid receptor 2 (Lpar2), mRNA.                                                             |
| 150458  | 0.020921338 | up | 1.3038534 | Trp53rk       | 76367  | Mus musculus transformation related protein 53 regulating kinase (Trp53rk), mRNA.                                        |
| 4070678 | 0.04330814  | up | 1.3034847 | 1810035L17Rik | 380773 | Mus musculus RIKEN cDNA 1810035L17 gene (1810035L17Rik), mRNA.                                                           |
| 2970184 | 0.020921338 | up | 1.3032786 | Phf12         | 268448 | Mus musculus PHD finger protein 12 (Phf12), mRNA.                                                                        |
| 3400612 | 0.04330814  | up | 1.3029826 | Sec14l1       |        |                                                                                                                          |
| 4180689 | 0.04330814  | up | 1.3024777 | Pias3         | 229615 | Mus musculus protein inhibitor of activated STAT 3 (Pias3), transcript variant 1, mRNA.                                  |
| 2190612 | 0.020921338 | up | 1.3018894 | Wipi2         | 74781  | Mus musculus WD repeat domain, phosphoinositide interacting 2 (Wipi2), mRNA.                                             |
| 60070   | 0.020921338 | up | 1.3015679 | Gpatch1       | 67471  | Mus musculus G patch domain containing 1 (Gpatch1), mRNA.                                                                |
| 3780192 | 0.04330814  | up | 1.3013839 | Rhof          | 23912  | Mus musculus ras homolog gene family, member f (Rhof), mRNA.                                                             |
| 3610463 | 0.04330814  | up | 1.3013179 | Ccdc66        | 320234 | Mus musculus coiled-coil domain containing 66 (Ccdc66), mRNA.                                                            |
| 1470521 | 0.04330814  | up | 1.3011494 | Sema4f        | 20355  | Mus musculus sema domain, immunoglobulin domain (Ig), TM domain, and short cytoplasmic domain (Sema4f), mRNA.            |
| 3390328 | 0.04330814  | up | 1.3009691 | Slc35c1       | 228368 | Mus musculus solute carrier family 35, member C1 (Slc35c1), transcript variant 2, mRNA.                                  |
| 2710730 | 0.020921338 | up | 1.3009652 | 2410002O22Rik | 66975  | Mus musculus RIKEN cDNA 2410002O22 gene (2410002O22Rik), transcript variant 2, mRNA.                                     |
| 3310653 | 0.04330814  | up | 1.2994522 | Kif3a         | 16568  | Mus musculus kinesin family member 3A (Kif3a), mRNA.                                                                     |
| 1940368 | 0.020164572 | up | 1.2994242 | 2810432D09Rik | 69961  | Mus musculus RIKEN cDNA 2810432D09 gene (2810432D09Rik), mRNA.                                                           |
| 2690240 | 0.020921338 | up | 1.2983782 | Trabd         | 67976  | Mus musculus TraB domain containing (Trabd), mRNA.                                                                       |
| 5360647 | 0.04330814  | up | 1.298307  | Rnasen        | 14000  | Mus musculus ribonuclease III, nuclear (Rnasen), mRNA.                                                                   |
| 3390187 | 0.020921338 | up | 1.2982732 | Ppp2r5d       | 21770  | Mus musculus protein phosphatase 2, regulatory subunit B (B56), delta isoform (Ppp2r5d), mRNA.                           |
| 4010402 | 0.04330814  | up | 1.2978543 | Gimap8        | 243374 | Mus musculus GTPase, IMAP family member 8 (Gimap8), transcript variant 1, mRNA.                                          |
| 6900538 | 0.04330814  | up | 1.2976949 | Trpc4ap       | 56407  | Mus musculus transient receptor potential cation channel, subfamily C, member 4 associated protein (Trpc4ap), mRNA.      |
| 4780653 | 0.04330814  | up | 1.2975532 | Bcl2l2        | 12050  | Mus musculus BCL2-like 2 (Bcl2l2), mRNA.                                                                                 |
| 2360131 | 0.020921338 | up | 1.2974973 | Kdelc1        | 72050  | Mus musculus KDEL (Lys-Asp-Glu-Leu) containing 1 (Kdelc1), mRNA.                                                         |
| 6980047 | 0.020921338 | up | 1.2972623 | Usp7          | 252870 | Mus musculus ubiquitin specific peptidase 7 (Usp7), mRNA.                                                                |
| 990056  | 0.04330814  | up | 1.2971741 | Dyrk1a        | 13548  | Mus musculus dual-specificity tyrosine-(Y)-phosphorylation regulated kinase 1a (Dyrk1a), mRNA.                           |
| 3310139 | 0.020921338 | up | 1.2970583 | Trim28        | 21849  | Mus musculus tripartite motif protein 28 (Trim28), mRNA.                                                                 |
| 2260131 | 0.04330814  | up | 1.2968303 | Dhx57         | 106794 | Mus musculus DEAH (Asp-Glu-Ala-Asp/His) box polypeptide 57 (Dhx57), mRNA.                                                |
| 7570050 | 0.020921338 | up | 1.2959248 | Hdac5         | 15184  | Mus musculus histone deacetylase 5 (Hdac5), transcript variant 1, mRNA.                                                  |
| 3060682 | 0.020921338 | up | 1.2955918 | Shprh         | 268281 | Mus musculus SNF2 histone linker PHD RING helicase (Shprh), transcript variant 1, mRNA.                                  |
| 1450040 | 0.04330814  | up | 1.295557  | Stk32c        | 57740  | Mus musculus serine/threonine kinase 32C (Stk32c), mRNA.                                                                 |
| 450092  | 0.020921338 | up | 1.2954785 | Rilpl1        | 75695  | Mus musculus Rab interacting lysosomal protein-like 1 (Rilpl1), mRNA.                                                    |
| 3360022 | 0.020921338 | up | 1.2954367 | Zkscan14      | 67235  | Mus musculus zinc finger with KRAB and SCAN domains 14 (Zkscan14), mRNA.                                                 |

|         |             |    |           |               |        |                                                                                                                   |
|---------|-------------|----|-----------|---------------|--------|-------------------------------------------------------------------------------------------------------------------|
| 7610202 | 0.020921338 | up | 1.2953966 | Top3b         | 21976  | Mus musculus topoisomerase (DNA) III beta (Top3b), mRNA.                                                          |
| 2070242 | 0.020921338 | up | 1.2952708 | Brip1         | 237911 | Mus musculus BRCA1 interacting protein C-terminal helicase 1 (Brip1), mRNA.                                       |
| 2490427 | 0.020921338 | up | 1.2950095 | Lysmd4        | 75099  | Mus musculus LysM, putative peptidoglycan-binding, domain containing 4 (Lysmd4), mRNA.                            |
| 770482  | 0.020921338 | up | 1.2949648 | Spag7         | 216873 | Mus musculus sperm associated antigen 7 (Spag7), mRNA.                                                            |
| 2710253 | 0.020921338 | up | 1.2945524 | Tdrd3         | 219249 | Mus musculus tudor domain containing 3 (Tdrd3), mRNA.                                                             |
| 10669   | 0.020921338 | up | 1.2944647 | Centg3        |        |                                                                                                                   |
| 2070605 | 0.020921338 | up | 1.2944376 | 2610036D13Rik | 75425  | Mus musculus RIKEN cDNA 2610036D13 gene (2610036D13Rik), mRNA.                                                    |
| 3450091 | 0.04330814  | up | 1.2942194 | Ctsz          | 64138  | Mus musculus cathepsin Z (Ctsz), mRNA.                                                                            |
| 1990445 | 0.020921338 | up | 1.2941304 | Abcf3         | 27406  | Mus musculus ATP-binding cassette, sub-family F (GCN20), member 3 (Abcf3), mRNA.                                  |
| 2320017 | 0.04330814  | up | 1.2940061 | Acrbp         | 54137  | Mus musculus proacrosin binding protein (Acrbp), mRNA.                                                            |
| 6400474 | 0.020921338 | up | 1.2937347 | Ccdc93        | 70829  | Mus musculus coiled-coil domain containing 93 (Ccdc93), transcript variant 1, mRNA.                               |
| 5870154 | 0.020164572 | up | 1.2933041 | Gapdh         | 14433  | Mus musculus glyceraldehyde-3-phosphate dehydrogenase (Gapdh), mRNA.                                              |
| 1940358 | 0.04330814  | up | 1.292785  | Mrpl22        | 216767 | Mus musculus mitochondrial ribosomal protein L22 (Mrpl22), nuclear gene encoding mitochondrial protein, mRNA.     |
| 830072  | 0.020921338 | up | 1.2923622 | Lilrb4        | 14728  | Mus musculus leukocyte immunoglobulin-like receptor, subfamily B, member 4 (Lilrb4), mRNA.                        |
| 5670523 | 0.04330814  | up | 1.2922888 | Zmiz1         | 328365 | Mus musculus zinc finger, MIZ-type containing 1 (Zmiz1), mRNA.                                                    |
| 6900551 | 0.020921338 | up | 1.2921917 | Pla2g4b       | 211429 | Mus musculus phospholipase A2, group IVB (cytosolic) (Pla2g4b), mRNA.                                             |
| 2710703 | 0.04330814  | up | 1.2916083 | E130306D19Rik |        |                                                                                                                   |
| 3800367 | 0.020921338 | up | 1.2914009 | Rmnd5b        | 66089  | Mus musculus required for meiotic nuclear division 5 homolog B ( <i>S. cerevisiae</i> ) (Rmnd5b), mRNA.           |
| 1820725 | 0.020921338 | up | 1.2913163 | Mta3          | 116871 | Mus musculus metastasis associated 3 (Mta3), mRNA.                                                                |
| 3520192 | 0.020921338 | up | 1.291288  | Srpr          | 67398  | Mus musculus signal recognition particle receptor ('docking protein') (Srpr), mRNA.                               |
| 5690241 | 0.020921338 | up | 1.2908446 | Lca5          | 75782  | Mus musculus Leber congenital amaurosis 5 (human) (Lca5), transcript variant 2, mRNA.                             |
| 5720100 | 0.020921338 | up | 1.2907504 | Cd151         | 12476  | Mus musculus CD151 antigen (Cd151), mRNA.                                                                         |
| 6450440 | 0.04330814  | up | 1.2897382 | Nfkbil1       | 18038  | Mus musculus nuclear factor of kappa light polypeptide gene enhancer in B-cells inhibitor-like 1 (Nfkbil1), mRNA. |
| 5910463 | 0.020921338 | up | 1.2895863 | 2510012J08Rik | 70312  | Mus musculus RIKEN cDNA 2510012J08 gene (2510012J08Rik), mRNA.                                                    |
| 1570468 | 0.020921338 | up | 1.2892913 | Zfp790        | 233056 | Mus musculus zinc finger protein 790 (Zfp790), mRNA.                                                              |
| 5570379 | 0.020921338 | up | 1.2891117 | Acad10        | 71985  | Mus musculus acyl-Coenzyme A dehydrogenase family, member 10 (Acad10), mRNA.                                      |
| 6330167 | 0.020921338 | up | 1.2889076 | Nol1          | 110109 | Mus musculus nucleolar protein 1 (Nol1), mRNA.                                                                    |
| 5820593 | 0.020921338 | up | 1.2885218 | Parp1         | 11545  | Mus musculus poly (ADP-ribose) polymerase family, member 1 (Parp1), mRNA.                                         |
| 3390484 | 0.020921338 | up | 1.2883698 | Scly          | 50880  | Mus musculus selenocysteine lyase (Scly), mRNA.                                                                   |
| 6330546 | 0.04330814  | up | 1.2883193 | Irak1         | 16179  | Mus musculus interleukin-1 receptor-associated kinase 1 (Irak1), mRNA.                                            |
| 7570291 | 0.04330814  | up | 1.2883029 | Lsm14a        | 67070  | Mus musculus LSM14 homolog A (SCD6, <i>S. cerevisiae</i> ) (Lsm14a), mRNA.                                        |
| 940674  | 0.020921338 | up | 1.288087  | Psme1         | 19186  | Mus musculus proteasome (prosome, macropain) 28 subunit, alpha (Psme1), mRNA.                                     |
| 6280128 | 0.04330814  | up | 1.2870789 | Rrp12         | 107094 | Mus musculus ribosomal RNA processing 12 homolog ( <i>S. cerevisiae</i> ) (Rrp12), mRNA.                          |
| 7040201 | 0.040833138 | up | 1.2870517 | Thy1          | 21838  | Mus musculus thymus cell antigen 1, theta (Thy1), mRNA.                                                           |
| 3520543 | 0.020921338 | up | 1.286686  | Alg11         | 207958 | Mus musculus asparagine-linked glycosylation 11 homolog (yeast, alpha-1,2-mannosyltransferase) (Alg11), mRNA.     |
| 5290204 | 0.020921338 | up | 1.2866592 | lft140        | 106633 | Mus musculus intraflagellar transport 140 homolog ( <i>Chlamydomonas</i> ) (lft140), mRNA.                        |
| 3870520 | 0.020921338 | up | 1.286549  | 2810452K22Rik | 67236  | Mus musculus RIKEN cDNA 2810452K22 gene (2810452K22Rik), mRNA.                                                    |
| 4120309 | 0.020921338 | up | 1.2860284 | Dus4l         | 71916  | Mus musculus dihydrouridine synthase 4-like ( <i>S. cerevisiae</i> ) (Dus4l), mRNA.                               |
| 2760577 | 0.04330814  | up | 1.2857713 | Rtp4          | 67775  | Mus musculus receptor transporter protein 4 (Rtp4), mRNA.                                                         |
| 5290369 | 0.04330814  | up | 1.2857479 | Metap1        | 75624  | Mus musculus methionyl aminopeptidase 1 (Metap1), mRNA.                                                           |
| 3940044 | 0.020921338 | up | 1.2853417 | Hgs           | 15239  | Mus musculus HGF-regulated tyrosine kinase substrate (Hgs), mRNA.                                                 |
| 2000291 | 0.020921338 | up | 1.2853185 | D030056L22Rik | 225995 | Mus musculus RIKEN cDNA D030056L22 gene (D030056L22Rik), mRNA.                                                    |
| 7380368 | 0.020921338 | up | 1.2852584 | Nab2          | 17937  | Mus musculus Ngfi-A binding protein 2 (Nab2), mRNA.                                                               |
| 4560504 | 0.020921338 | up | 1.2849047 | Mrps7         | 50529  | Mus musculus mitochondrial ribosomal protein S7 (Mrps7), mRNA.                                                    |
| 5260097 | 0.04330814  | up | 1.2835399 | Tmem63a       | 208795 | Mus musculus transmembrane protein 63a (Tmem63a), mRNA.                                                           |
| 4640324 | 0.04330814  | up | 1.2835028 | Tpst2         | 22022  | Mus musculus protein-tyrosine sulfotransferase 2 (Tpst2), mRNA.                                                   |
| 4150538 | 0.04330814  | up | 1.2834307 | Bre           | 107976 | Mus musculus brain and reproductive organ-expressed protein (Bre), transcript variant 4, mRNA.                    |
| 5130487 | 0.04330814  | up | 1.283376  | Rgs12         | 71729  | Mus musculus regulator of G-protein signaling 12 (Rgs12), mRNA.                                                   |
| 5960053 | 0.020921338 | up | 1.2823197 | Emilin1       |        |                                                                                                                   |
| 3060609 | 0.020921338 | up | 1.281638  | Mtfmt         | 69606  | Mus musculus mitochondrial methionyl-tRNA formyltransferase (Mtfmt), mRNA.                                        |
| 1770739 | 0.04330814  | up | 1.2813561 | Tsen54        | 76265  | Mus musculus tRNA splicing endonuclease 54 homolog ( <i>S. cerevisiae</i> ) (Tsen54), mRNA.                       |
| 5720328 | 0.020921338 | up | 1.2813557 | Nrip1         | 268903 | Mus musculus nuclear receptor interacting protein 1 (Nrip1), mRNA.                                                |

|         |             |    |           |               |           |                                                                                                            |
|---------|-------------|----|-----------|---------------|-----------|------------------------------------------------------------------------------------------------------------|
| 5310722 | 0.020921338 | up | 1.2812433 | 1200015F23Rik | 67809     | Mus musculus RIKEN cDNA 1200015F23 gene (1200015F23Rik), mRNA.<br>XM_924991                                |
| 6400309 | 0.020921338 | up | 1.2807584 | Chrnb2        | 11444     | Mus musculus cholinergic receptor, nicotinic, beta polypeptide 2 (neuronal) (Chrnb2), mRNA.                |
| 3890041 | 0.020921338 | up | 1.2806436 | Ddx24         | 27225     | Mus musculus DEAD (Asp-Glu-Ala-Asp) box polypeptide 24 (Ddx24), mRNA.                                      |
| 2320187 | 0.020921338 | up | 1.2805756 | Zfp748        | 212276    | Mus musculus zinc finger protein 748 (Zfp748), transcript variant 1, mRNA.                                 |
| 4230437 | 0.042066425 | up | 1.280212  | Cd48          | 12506     | Mus musculus CD48 antigen (Cd48), mRNA.                                                                    |
| 1940739 | 0.04330814  | up | 1.2802047 | Gmip          | 78816     | Mus musculus Gem-interacting protein (Gmip), mRNA.                                                         |
| 5490181 | 0.020921338 | up | 1.2795157 | 4930547N16Rik | 75317     | Mus musculus RIKEN cDNA 4930547N16 gene (4930547N16Rik), mRNA.                                             |
| 4120768 | 0.020921338 | up | 1.2795084 | Dnaja1        | 15502     | Mus musculus DnaJ (Hsp40) homolog, subfamily A, member 1 (Dnaja1), mRNA.                                   |
| 6840056 | 0.020921338 | up | 1.2789061 | Mink1         | 50932     | Mus musculus misshapen-like kinase 1 (zebrafish) (Mink1), transcript variant 3, mRNA.                      |
| 4640020 | 0.04330814  | up | 1.2780633 | Nploc4        | 217365    | Mus musculus nuclear protein localization 4 homolog ( <i>S. cerevisiae</i> ) (Nploc4), mRNA.               |
| 1780079 | 0.020921338 | up | 1.277608  | Il7r          | 16197     | Mus musculus interleukin 7 receptor (Il7r), mRNA.                                                          |
| 3120500 | 0.020921338 | up | 1.2770457 | Tcf3          | 21415     | Mus musculus transcription factor 3 (Tcf3), transcript variant 1, mRNA.                                    |
| 3520162 | 0.020921338 | up | 1.2764543 | Pmf1          | 67037     | Mus musculus polyamine-modulated factor 1 (Pmf1), mRNA.                                                    |
| 4480519 | 0.020921338 | up | 1.2760735 | Herc4         | 67345     | Mus musculus hect domain and RLD 4 (Herc4), mRNA.                                                          |
| 5260553 | 0.020921338 | up | 1.2758876 | Atf2          | 11909     | Mus musculus activating transcription factor 2 (Atf2), transcript variant 1, mRNA.                         |
| 7330152 | 0.020921338 | up | 1.2757621 | EG432879      | 432879    | Mus musculus predicted gene, EG432879 (EG432879), mRNA.                                                    |
| 2600176 | 0.020921338 | up | 1.27555   | Tubb4         | 22153     | Mus musculus tubulin, beta 4 (Tubb4), mRNA.                                                                |
| 1710286 | 0.020921338 | up | 1.2753057 | B230312118Rik | 233058    | PREDICTED: Mus musculus RIKEN cDNA B230312118 gene, transcript variant 3 (B230312118Rik), mRNA.            |
| 460747  | 0.020921338 | up | 1.2752855 | Fbxo21        | 231670    | Mus musculus F-box protein 21 (Fbxo21), mRNA.                                                              |
| 620682  | 0.020921338 | up | 1.2751992 | Gps1          | 209318    | Mus musculus G protein pathway suppressor 1 (Gps1), mRNA.                                                  |
| 4200504 | 0.020921338 | up | 1.2750143 | Psmc5         | 19184     | Mus musculus protease (prosome, macropain) 26S subunit, ATPase 5 (Psmc5), mRNA.                            |
| 6900332 | 0.020921338 | up | 1.2748729 | Narg1         |           |                                                                                                            |
| 630100  | 0.020921338 | up | 1.2746379 | Defb11        | 246081    | Mus musculus defensin beta 11 (Defb11), mRNA.                                                              |
| 5270681 | 0.020921338 | up | 1.2741134 | Ttll4         | 67534     | Mus musculus tubulin tyrosine ligase-like family, member 4 (Ttll4), mRNA.                                  |
| 5910056 | 0.04330814  | up | 1.2738621 | 1700020O03Rik | 70373     | Mus musculus RIKEN cDNA 1700020O03 gene (1700020O03Rik), mRNA.                                             |
| 5560040 | 0.04330814  | up | 1.273548  | D4Wsu114e     | 28010     | Mus musculus DNA segment, Chr 4, Wayne State University 114, expressed (D4Wsu114e), mRNA.                  |
| 3130021 | 0.020921338 | up | 1.273184  | Mrps25        |           |                                                                                                            |
| 7510424 | 0.020921338 | up | 1.2724966 | Rabep1        | 54189     | Mus musculus rabaptin, RAB GTPase binding effector protein 1 (Rabep1), mRNA.                               |
| 2370373 | 0.020921338 | up | 1.2723639 | Rbm19         | 74111     | Mus musculus RNA binding motif protein 19 (Rbm19), mRNA.                                                   |
| 2710376 | 0.020921338 | up | 1.272256  | Csnk1d        | 104318    | Mus musculus casein kinase 1, delta (Csnk1d), transcript variant 2, mRNA.                                  |
| 2230408 | 0.020921338 | up | 1.2721721 | Dld           | 13382     | Mus musculus dihydrolipoamide dehydrogenase (Dld), mRNA.                                                   |
| 2140192 | 0.04330814  | up | 1.2710764 | LOC100047184  | 100047184 | PREDICTED: Mus musculus similar to proteasome alpha7/C8 subunit (LOC100047184), mRNA.                      |
| 2600370 | 0.04330814  | up | 1.2709726 | D130040H23Rik | 211135    | Mus musculus RIKEN cDNA D130040H23 gene (D130040H23Rik), mRNA.                                             |
| 1990224 | 0.020921338 | up | 1.2704623 | Orc5l         | 26429     | Mus musculus origin recognition complex, subunit 5-like ( <i>S. cerevisiae</i> ) (Orc5l), mRNA.            |
| 4730131 | 0.020921338 | up | 1.2693068 | Phf19         | 74016     | Mus musculus PHD finger protein 19 (Phf19), mRNA.                                                          |
| 1170438 | 0.020921338 | up | 1.2689313 | LOC677205     | 677205    | PREDICTED: Mus musculus similar to DEAD (Asp-Glu-Ala-Asp) box polypeptide 18 (LOC677205), misc RNA.        |
| 4150747 | 0.04330814  | up | 1.2689304 | Sc5d          |           |                                                                                                            |
| 830523  | 0.020921338 | up | 1.2689302 | LOC386486     |           |                                                                                                            |
| 730465  | 0.020921338 | up | 1.2687999 | Ankrd13c      | 433667    | Mus musculus ankyrin repeat domain 13c (Ankrd13c), mRNA.                                                   |
| 3180678 | 0.020921338 | up | 1.2687534 | Smpd4         | 77626     | Mus musculus sphingomyelin phosphodiesterase 4 (Smpd4), mRNA.                                              |
| 6020524 | 0.020921338 | up | 1.2683451 | Oprs1         | 18391     | Mus musculus opioid receptor, sigma 1 (Oprs1), mRNA.                                                       |
| 3140328 | 0.020921338 | up | 1.2679341 | Ptp4a3        | 19245     | Mus musculus protein tyrosine phosphatase 4a3 (Ptp4a3), mRNA.                                              |
| 2810347 | 0.04330814  | up | 1.2676767 | F730014I05Rik | 228866    | Mus musculus RIKEN cDNA F730014I05 gene (F730014I05Rik), mRNA.                                             |
| 3460333 | 0.04330814  | up | 1.2676305 | Golm1         | 105348    | Mus musculus golgi membrane protein 1 (Golm1), transcript variant 1, mRNA.                                 |
| 7320162 | 0.04330814  | up | 1.2676272 | 2310047D13Rik | 116972    | Mus musculus RIKEN cDNA 2310047D13 gene (2310047D13Rik), mRNA.                                             |
| 4570184 | 0.04330814  | up | 1.2675194 | Igf2bp2       | 319765    | Mus musculus insulin-like growth factor 2 mRNA binding protein 2 (Igf2bp2), mRNA.                          |
| 4640670 | 0.020921338 | up | 1.2673308 | Skiv2l2       | 72198     | Mus musculus superkiller viralicidic activity 2-like 2 ( <i>S. cerevisiae</i> ) (Skiv2l2), mRNA.           |
| 6650424 | 0.020921338 | up | 1.267031  | LOC100046690  | 100046690 | PREDICTED: Mus musculus hypothetical protein LOC100046690 (LOC100046690), mRNA.                            |
| 380184  | 0.04330814  | up | 1.2663612 | Serbp1        | 66870     | Mus musculus Serpine1 mRNA binding protein 1 (Serbp1), mRNA.                                               |
| 6620528 | 0.020921338 | up | 1.2659749 | Ccdc97        | 52132     | Mus musculus coiled-coil domain containing 97 (Ccdc97), mRNA.                                              |
| 130768  | 0.020921338 | up | 1.2658916 | 2310047D13Rik |           |                                                                                                            |
| 670288  | 0.04330814  | up | 1.2658521 | Jtb           | 23922     | Mus musculus jumping translocation breakpoint (Jtb), mRNA.                                                 |
| 5340228 | 0.020921338 | up | 1.265768  | Ivd           | 56357     | Mus musculus isovaleryl coenzyme A dehydrogenase (Ivd), nuclear gene encoding mitochondrial protein, mRNA. |

|         |             |    |           |                 |           |                                                                                                                                           |
|---------|-------------|----|-----------|-----------------|-----------|-------------------------------------------------------------------------------------------------------------------------------------------|
| 4480497 | 0.020921338 | up | 1.2652956 | Fam120b         | 67544     | Mus musculus family with sequence similarity 120, member B (Fam120b), mRNA.                                                               |
| 5360008 | 0.020921338 | up | 1.2645727 | Ino80e          | 233875    | Mus musculus NO80 complex subunit E (Ino80e), mRNA.                                                                                       |
| 2030368 | 0.020921338 | up | 1.2641987 | 9130404D08Rik   | 74549     | Mus musculus RIKEN cDNA 9130404D08 gene (9130404D08Rik), mRNA.                                                                            |
| 7400369 | 0.04330814  | up | 1.2640762 | Plagl2          | 54711     | Mus musculus pleiomorphic adenoma gene-like 2 (Plagl2), mRNA.                                                                             |
| 7100154 | 0.04330814  | up | 1.2638826 | Cdk5            | 12568     | Mus musculus cyclin-dependent kinase 5 (Cdk5), mRNA.                                                                                      |
| 1070646 | 0.04330814  | up | 1.2632257 | Ankfy1          | 11736     | Mus musculus ankyrin repeat and FYVE domain containing 1 (Ankfy1), mRNA.                                                                  |
| 50296   | 0.020921338 | up | 1.2628492 | Usp10           | 22224     | Mus musculus ubiquitin specific peptidase 10 (Usp10), mRNA.                                                                               |
| 1090497 | 0.04330814  | up | 1.2627316 | Slc16a3         | 80879     | Mus musculus solute carrier family 16 (monocarboxylic acid transporters), member 3 (Slc16a3), mRNA.                                       |
| 130437  | 0.020921338 | up | 1.2624736 | Mxd3            | 17121     | Mus musculus Max dimerization protein 3 (Mxd3), mRNA.                                                                                     |
| 6510500 | 0.020921338 | up | 1.262236  | Cdca7           | 66953     | Mus musculus cell division cycle associated 7 (Cdca7), mRNA.                                                                              |
| 4640563 | 0.04330814  | up | 1.2612772 | Ythdf2          | 213541    | Mus musculus YTH domain family 2 (Ythdf2), mRNA.                                                                                          |
| 6420630 | 0.04330814  | up | 1.260901  | JSMUSG000000531 | 208595    | Mus musculus predicted gene, ENSMUSG00000053178, nuclear gene encoding mitochondrial protein, mRNA.                                       |
| 1580170 | 0.020921338 | up | 1.2608018 | Prkcq           |           |                                                                                                                                           |
| 4150725 | 0.020921338 | up | 1.2607628 | Ctsz            | 64138     | Mus musculus cathepsin Z (Ctsz), mRNA.                                                                                                    |
| 2350440 | 0.04330814  | up | 1.2604091 | Gpr68           | 238377    | Mus musculus G protein-coupled receptor 68 (Gpr68), mRNA.                                                                                 |
| 1070307 | 0.020921338 | up | 1.2603848 | Selplg          | 20345     | Mus musculus selectin, platelet (p-selectin) ligand (Selplg), mRNA.                                                                       |
| 2680468 | 0.04330814  | up | 1.2600617 | Ss18            | 268996    | Mus musculus synovial sarcoma translocation, Chromosome 18 (Ss18), mRNA.                                                                  |
| 5090053 | 0.020164572 | up | 1.2599353 | Cd63            | 12512     | Mus musculus CD63 antigen (Cd63), transcript variant 2, mRNA.                                                                             |
| 3450010 | 0.020921338 | up | 1.2593238 | Tk1             | 21877     | Mus musculus thymidine kinase 1 (Tk1), mRNA.                                                                                              |
| 5890750 | 0.020921338 | up | 1.25914   | Mbtps1          | 56453     | Mus musculus membrane-bound transcription factor peptidase, site 1 (Mbtps1), mRNA.                                                        |
| 2760608 | 0.04330814  | up | 1.258876  | Cad             | 69719     | Mus musculus carbamoyl-phosphate synthetase 2, aspartate transcarbamylase, and dihydroorotase (Cad), mRNA.                                |
| 4210719 | 0.04330814  | up | 1.258771  | Pptc7           | 320717    | Mus musculus PTC7 protein phosphatase homolog ( <i>S. cerevisiae</i> ) (Pptc7), mRNA.                                                     |
| 6860300 | 0.04330814  | up | 1.2583098 | Slc39a13        | 68427     | Mus musculus solute carrier family 39 (metal ion transporter), member 13 (Slc39a13), mRNA.                                                |
| 1710474 | 0.04330814  | up | 1.258118  | Dgkq            | 110524    | Mus musculus diacylglycerol kinase, theta (Dgkq), mRNA.                                                                                   |
| 2000093 | 0.020921338 | up | 1.2580425 | BC021790        |           |                                                                                                                                           |
| 2480010 | 0.020921338 | up | 1.2578908 | Fastkd1         | 320720    | Mus musculus FAST kinase domains 1 (Fastkd1), mRNA.                                                                                       |
| 5570296 | 0.020921338 | up | 1.2578472 | D10Wsu52e       | 28088     | Mus musculus DNA segment, Chr 10, Wayne State University 52, expressed (D10Wsu52e), mRNA.                                                 |
| 4070189 | 0.04330814  | up | 1.2573366 | Prkcsh          | 19089     | Mus musculus protein kinase C substrate 80K-H (Prkcsh), mRNA.                                                                             |
| 6270600 | 0.04330814  | up | 1.2572601 | Osm             | 18413     | Mus musculus oncostatin M (Osm), mRNA.                                                                                                    |
| 5390632 | 0.020921338 | up | 1.2569956 | Tmie            | 20776     | Mus musculus transmembrane inner ear (Tmie), mRNA.                                                                                        |
| 7100220 | 0.04330814  | up | 1.2567991 | Tada3l          | 101206    | Mus musculus transcriptional adaptor 3 (NGG1 homolog, yeast)-like (Tada3l), mRNA.                                                         |
| 6350086 | 0.04330814  | up | 1.2564971 | Slc6a8          | 102857    | Mus musculus solute carrier family 6 (neurotransmitter transporter, creatine), member 8 (Slc6a8), mRNA.                                   |
| 4220711 | 0.020921338 | up | 1.2563918 | Eif2ak1         |           |                                                                                                                                           |
| 4150242 | 0.020921338 | up | 1.2558864 | Gats            | 80909     | Mus musculus opposite strand transcription unit to Stag3 (Gats), mRNA.                                                                    |
| 5690095 | 0.020921338 | up | 1.2556669 | Tmem19          | 67226     | Mus musculus transmembrane protein 19 (Tmem19), mRNA.                                                                                     |
| 5820619 | 0.04330814  | up | 1.2554231 | Zfp160          | 224585    | Mus musculus zinc finger protein 160 (Zfp160), mRNA.                                                                                      |
| 1170424 | 0.04330814  | up | 1.2552272 | Rab3gap2        | 98732     | PREDICTED: Mus musculus RAB3 GTPase activating protein subunit 2, transcript variant 4 (Rab3gap2), mRNA.                                  |
| 3870102 | 0.020921338 | up | 1.2552146 | Rnf168          | 70238     | Mus musculus ring finger protein 168 (Rnf168), mRNA.                                                                                      |
| 4760291 | 0.04330814  | up | 1.2548282 | Vac14           | 234729    | Mus musculus Vac14 homolog ( <i>S. cerevisiae</i> ) (Vac14), mRNA.                                                                        |
| 5690689 | 0.020921338 | up | 1.2546868 | Dpp9            | 224897    | Mus musculus dipeptidylpeptidase 9 (Dpp9), mRNA.                                                                                          |
| 610369  | 0.020921338 | up | 1.2545974 | Msh2            | 17685     | Mus musculus mutS homolog 2 ( <i>E. coli</i> ) (Msh2), mRNA.                                                                              |
| 5560646 | 0.020921338 | up | 1.254398  | Rrm2            | 20135     | Mus musculus ribonucleotide reductase M2 (Rrm2), mRNA.                                                                                    |
| 1400735 | 0.020921338 | up | 1.2543244 | Apba3           | 57267     | Mus musculus amyloid beta (A4) precursor protein-binding, family A, member 3 (Apba3), mRNA.                                               |
| 5690181 | 0.04330814  | up | 1.2539005 | LOC100048331    | 100048331 | PREDICTED: Mus musculus similar to DnaJ (Hsp40) homolog, subfamily A, member 4 (LOC100048331), misc RNA.                                  |
| 5340398 | 0.04330814  | up | 1.2533928 | Spc24           | 67629     | Mus musculus SPC24, NDC80 kinetochore complex component, homolog ( <i>S. cerevisiae</i> ) (Spc24), mRNA.                                  |
| 6840059 | 0.04330814  | up | 1.2530884 | Tnfsf13b        | 24099     | Mus musculus tumor necrosis factor (ligand) superfamily, member 13b (Tnfsf13b), mRNA.                                                     |
| 6510025 | 0.020921338 | up | 1.252801  | Ndp52           | 76815     | Mus musculus nuclear domain 10 protein 52 (Ndp52), mRNA. XM_989530 XM_989588 XM_992279 XM_992355                                          |
| 1510019 | 0.04330814  | up | 1.2527721 | Hps1            | 192236    | Mus musculus Hermansky-Pudlak syndrome 1 homolog (human) (Hps1), mRNA.                                                                    |
| 2650156 | 0.020921338 | up | 1.252613  | Limk1           | 16885     | Mus musculus LIM-domain containing, protein kinase (Limk1), mRNA.                                                                         |
| 5360689 | 0.020921338 | up | 1.2523613 | Hbp1            | 73389     | Mus musculus high mobility group box transcription factor 1 (Hbp1), transcript variant 1, mRNA.                                           |
| 4490341 | 0.020921338 | up | 1.2523594 | Dcun1d2         | 102323    | Mus musculus DCN1, defective in cullin neddylation 1, domain containing 2 ( <i>S. cerevisiae</i> ) (Dcun1d2), transcript variant 3, mRNA. |
| 6770634 | 0.04330814  | up | 1.2521907 | Ppp1r3f         | 54646     | Mus musculus protein phosphatase 1, regulatory (inhibitor) subunit 3F (Ppp1r3f), mRNA.                                                    |

|         |             |    |           |               |        |                                                                                                                               |
|---------|-------------|----|-----------|---------------|--------|-------------------------------------------------------------------------------------------------------------------------------|
| 6380338 | 0.04330814  | up | 1.2517865 | Atg16l1       | 77040  | Mus musculus autophagy-related 16-like 1 (yeast) (Atg16l1), transcript variant b, mRNA.                                       |
| 2900307 | 0.020921338 | up | 1.2516164 | 5830405N20Rik | 67596  | Mus musculus RIKEN cDNA 5830405N20 gene (5830405N20Rik), mRNA.                                                                |
| 1740059 | 0.04330814  | up | 1.2514001 | Pnpla7        | 241274 | Mus musculus patatin-like phospholipase domain containing 7 (Pnpla7), mRNA.                                                   |
| 1090328 | 0.020921338 | up | 1.2512498 | Suv39h1       | 20937  | Mus musculus suppressor of variegation 3-9 homolog 1 (Drosophila) (Suv39h1), mRNA.                                            |
| 1580368 | 0.020921338 | up | 1.2510291 | Vps45         | 22365  | Mus musculus vacuolar protein sorting 45 (yeast) (Vps45), mRNA.                                                               |
| 4210278 | 0.04330814  | up | 1.2506756 | Zfp771        | 244216 | Mus musculus zinc finger protein 771 (Zfp771), mRNA.                                                                          |
| 4050360 | 0.04330814  | up | 1.2506291 | Atmin         | 234776 | Mus musculus ATM interactor (Atmin), mRNA.                                                                                    |
| 1010397 | 0.020921338 | up | 1.2505132 | Irf4          | 16364  | Mus musculus interferon regulatory factor 4 (Irf4), mRNA.                                                                     |
| 6980170 | 0.020921338 | up | 1.2504879 | Podnl1        | 244550 | Mus musculus podocan-like 1 (Podnl1), mRNA.                                                                                   |
| 5570246 | 0.020921338 | up | 1.2497997 | Pim2          | 18715  | Mus musculus proviral integration site 2 (Pim2), mRNA.                                                                        |
| 4200746 | 0.020921338 | up | 1.2491702 | Setdb1        | 84505  | Mus musculus SET domain, bifurcated 1 (Setdb1), mRNA.                                                                         |
| 5890064 | 0.020921338 | up | 1.2490969 | Rras          | 20130  | Mus musculus Harvey rat sarcoma oncogene, subgroup R (Rras), mRNA.                                                            |
| 5960274 | 0.04330814  | up | 1.248926  | BC062115      | 408062 | Mus musculus cDNA sequence BC062115 (BC062115), mRNA. XM_924416                                                               |
| 4040253 | 0.020921338 | up | 1.2488378 | Zbtb8os       | 67106  | Mus musculus zinc finger and BTB domain containing 8 opposite strand (Zbtb8os), mRNA.                                         |
| 4610239 | 0.04330814  | up | 1.2485988 | 0610007P08Rik | 76251  | Mus musculus RIKEN cDNA 0610007P08 gene (0610007P08Rik), transcript variant 2, mRNA.                                          |
| 1340753 | 0.020921338 | up | 1.2484834 | Zfp623        | 78834  | Mus musculus zinc finger protein 623 (Zfp623), mRNA.                                                                          |
| 2140687 | 0.020921338 | up | 1.247933  | Ywhab         | 54401  | Mus musculus tyrosine 3-monooxygenase/tryptophan 5-monooxygenase activation protein, beta polypeptide (Ywhab), mRNA.          |
| 990543  | 0.020921338 | up | 1.2478276 | B230317C12Rik | 56279  | Mus musculus RIKEN cDNA B230317C12 gene (B230317C12Rik), mRNA.                                                                |
| 2970619 | 0.020921338 | up | 1.247692  | Wdr18         | 216156 | Mus musculus WD repeat domain 18 (Wdr18), mRNA. XM_914259<br>XM_923132 XM_923137 XM_923141 XM_923147                          |
| 4280458 | 0.04330814  | up | 1.247647  | Cops2         | 12848  | Mus musculus COP9 (constitutive photomorphogenic) homolog, subunit 2 (Arabidopsis thaliana) (Cops2), mRNA.                    |
| 6330703 | 0.020921338 | up | 1.2475227 | Ears2         | 67417  | Mus musculus glutamyl-tRNA synthetase 2 (mitochondrial)(putative) (Ears2), nuclear gene encoding mitochondrial protein, mRNA. |
| 5570575 | 0.04330814  | up | 1.2471203 | Coq3          | 230027 | Mus musculus coenzyme Q3 homolog, methyltransferase (yeast) (Coq3), mRNA.                                                     |
| 4290537 | 0.04330814  | up | 1.2465304 | BC003993      | 80744  | Mus musculus cDNA sequence BC003993 (BC003993), mRNA.                                                                         |
| 3610619 | 0.020921338 | up | 1.2460567 | Nt5e          | 23959  | Mus musculus 5' nucleotidase, ecto (Nt5e), mRNA.                                                                              |
| 3370671 | 0.020921338 | up | 1.2458537 | Alg3          |        |                                                                                                                               |
| 730129  | 0.020921338 | up | 1.2457021 | Acot7         | 70025  | Mus musculus acyl-CoA thioesterase 7 (Acot7), mRNA.                                                                           |
| 1170390 | 0.020921338 | up | 1.2439653 | Gnb2          | 14693  | Mus musculus guanine nucleotide binding protein (G protein), beta 2 (Gnb2), mRNA.                                             |
| 6580369 | 0.04330814  | up | 1.2438715 | Csde1         | 229663 | Mus musculus cold shock domain containing E1, RNA binding (Csde1), mRNA.                                                      |
| 1470292 | 0.04330814  | up | 1.2434922 | Pwp2          | 110816 | Mus musculus PWP2 periodic tryptophan protein homolog (yeast) (Pwp2), mRNA.                                                   |
| 4280402 | 0.020921338 | up | 1.2434047 | Ephx1         | 13849  | Mus musculus epoxide hydrolase 1, microsomal (Ephx1), mRNA.                                                                   |
| 5340110 | 0.020921338 | up | 1.2433542 | Tbc1d13       | 70296  | Mus musculus TBC1 domain family, member 13 (Tbc1d13), mRNA.                                                                   |
| 290328  | 0.04330814  | up | 1.2432582 | Phlda3        | 27280  | Mus musculus pleckstrin homology-like domain, family A, member 3 (Phlda3), mRNA.                                              |
| 5820309 | 0.020921338 | up | 1.2429358 | Smg5          | 229512 | Mus musculus Smg-5 homolog, nonsense mediated mRNA decay factor (C. elegans) (Smg5), mRNA.                                    |
| 150397  | 0.020921338 | up | 1.2425833 | Mllt1         | 64144  | Mus musculus myeloid/lymphoid or mixed-lineage leukemia (trithorax homolog, Drosophila); translocated to, 1 (Mllt1), mRNA.    |
| 4540682 | 0.04330814  | up | 1.2425766 | Usp52         | 103135 | Mus musculus ubiquitin specific peptidase 52 (Usp52), mRNA.                                                                   |
| 670204  | 0.020921338 | up | 1.2424145 | Gimap7        | 231932 | Mus musculus GTPase, IMAP family member 7 (Gimap7), mRNA.                                                                     |
| 2340138 | 0.04330814  | up | 1.242367  | Ncstn         | 59287  | Mus musculus nicastrin (Ncstn), mRNA.                                                                                         |
| 2100196 | 0.04330814  | up | 1.2423172 | Fnbp1         | 14269  | Mus musculus formin binding protein 1 (Fnbp1), transcript variant 1, mRNA.                                                    |
| 1450735 | 0.04330814  | up | 1.2420263 | H1fx          | 243529 | Mus musculus H1 histone family, member X (H1fx), mRNA.                                                                        |
| 240682  | 0.020921338 | up | 1.241941  | Ankrd13b      | 268445 | Mus musculus ankyrin repeat domain 13b (Ankrd13b), mRNA.                                                                      |
| 620538  | 0.020921338 | up | 1.2417    | Tmem186       | 66690  | Mus musculus transmembrane protein 186 (Tmem186), mRNA.                                                                       |
| 110010  | 0.04330814  | up | 1.2415379 | P2rx6         | 18440  | Mus musculus purinergic receptor P2X, ligand-gated ion channel, 6 (P2rx6), mRNA.                                              |
| 5090332 | 0.04330814  | up | 1.2411911 | Mrps15        | 66407  | Mus musculus mitochondrial ribosomal protein S15 (Mrps15), nuclear gene encoding mitochondrial protein, mRNA.                 |
| 2710746 | 0.04330814  | up | 1.2411444 | Polg          | 18975  | Mus musculus polymerase (DNA directed), gamma (Polg), mRNA.                                                                   |
| 4900292 | 0.020921338 | up | 1.2402394 | Kcnh2         | 16511  | Mus musculus potassium voltage-gated channel, subfamily H (eag-related), member 2 (Kcnh2), mRNA.                              |
| 1070544 | 0.04330814  | up | 1.240083  | Snx25         | 102141 | Mus musculus sorting nexin 25 (Snx25), mRNA.                                                                                  |
| 1780088 | 0.020921338 | up | 1.239744  | B230317C12Rik | 56279  | Mus musculus RIKEN cDNA B230317C12 gene (B230317C12Rik), mRNA.                                                                |
| 620202  | 0.04330814  | up | 1.2392625 | Smtn          | 29856  | Mus musculus smoothelin (Smtn), mRNA.                                                                                         |
| 6480201 | 0.020921338 | up | 1.2392478 | Mocos         | 68591  | Mus musculus molybdenum cofactor sulfurase (Mocos), mRNA.                                                                     |
| 610717  | 0.04330814  | up | 1.2392064 | Ccnd3         | 12445  | Mus musculus cyclin D3 (Ccnd3), transcript variant 1, mRNA.                                                                   |
| 4200482 | 0.04330814  | up | 1.239053  | Gphn          | 268566 | Mus musculus gephyrin (Gphn), mRNA.                                                                                           |
| 70338   | 0.04330814  | up | 1.238576  | Pdcd1         | 18566  | Mus musculus programmed cell death 1 (Pdcd1), mRNA.                                                                           |
| 7510079 | 0.020921338 | up | 1.2385751 | Ercc8         | 71991  | Mus musculus excision repair-complementing rodent repair deficiency, complementation group 8 (Ercc8), mRNA.                   |



|         |             |    |           |               |        |                                                                                                                                                    |
|---------|-------------|----|-----------|---------------|--------|----------------------------------------------------------------------------------------------------------------------------------------------------|
| 1050092 | 0.04330814  | up | 1.237971  | Serpina3g     | 20715  | Mus musculus serine (or cysteine) peptidase inhibitor, clade A, member 3G (Serpina3g), mRNA.                                                       |
| 4050626 | 0.04330814  | up | 1.2376852 | Tnf           | 21926  | Mus musculus tumor necrosis factor (Tnf), mRNA.                                                                                                    |
| 6180154 | 0.04330814  | up | 1.2373961 | Itk           | 16428  | Mus musculus IL2-inducible T-cell kinase (Itk), mRNA.                                                                                              |
| 4290019 | 0.04330814  | up | 1.2370507 | Rbm12         | 75710  | Mus musculus RNA binding motif protein 12 (Rbm12), transcript variant 2, mRNA.                                                                     |
| 4540048 | 0.04330814  | up | 1.236877  | Zfp646        | 233905 | Mus musculus zinc finger protein 646 (Zfp646), mRNA.                                                                                               |
| 1570075 | 0.04330814  | up | 1.236875  | Dis3l2        | 208718 | Mus musculus DIS3 mitotic control homolog (S. cerevisiae)-like 2 (Dis3l2), mRNA.                                                                   |
| 1110035 | 0.04330814  | up | 1.236221  | Rab3ip        | 216363 | Mus musculus RAB3A interacting protein (Rab3ip), mRNA.                                                                                             |
| 7050523 | 0.04330814  | up | 1.2361326 | Dem1          | 73172  | Mus musculus defects in morphology 1 homolog (S. cerevisiae) (Dem1), mRNA.                                                                         |
| 50592   | 0.04330814  | up | 1.2359903 | Sf3b3         | 101943 | Mus musculus splicing factor 3b, subunit 3 (Sf3b3), mRNA.                                                                                          |
| 430687  | 0.020921338 | up | 1.2359629 | Acad10        | 71985  | Mus musculus acyl-Coenzyme A dehydrogenase family, member 10 (Acad10), mRNA.                                                                       |
| 5360458 | 0.020921338 | up | 1.2359627 | Rrp9          | 27966  | Mus musculus RRP9, small subunit (SSU) processome component, homolog (yeast) (Rrp9), mRNA.                                                         |
| 5900575 | 0.020921338 | up | 1.2357154 | Il6st         | 16195  | Mus musculus interleukin 6 signal transducer (Il6st), mRNA.                                                                                        |
| 270376  | 0.020921338 | up | 1.2356071 | Thap7         |        |                                                                                                                                                    |
| 6370521 | 0.04330814  | up | 1.235314  | Mmp15         | 17388  | Mus musculus matrix metalloproteinase 15 (Mmp15), mRNA. XM_001002221                                                                               |
| 1260040 | 0.04330814  | up | 1.234734  | Trim62        | 67525  | Mus musculus tripartite motif-containing 62 (Trim62), mRNA.                                                                                        |
| 2100753 | 0.020921338 | up | 1.2344505 | Zfp689        | 71131  | Mus musculus zinc finger protein 689 (Zfp689), mRNA.                                                                                               |
| 6900020 | 0.020921338 | up | 1.2342566 | Slc25a22      | 68267  | Mus musculus solute carrier family 25 (mitochondrial carrier, glutamate), member 22 (Slc25a22), nuclear gene encoding mitochondrial protein, mRNA. |
| 6940017 | 0.020921338 | up | 1.2340331 | Mtif2         | 76784  | Mus musculus mitochondrial translational initiation factor 2 (Mtif2), nuclear gene encoding mitochondrial protein, mRNA.                           |
| 3130458 | 0.04330814  | up | 1.2339932 | Tubb3         | 22152  | Mus musculus tubulin, beta 3 (Tubb3), mRNA.                                                                                                        |
| 2450075 | 0.020921338 | up | 1.233973  | Zfp90         |        |                                                                                                                                                    |
| 3440301 | 0.04330814  | up | 1.2339458 | Polm          | 54125  | Mus musculus polymerase (DNA directed), mu (Polm), mRNA.                                                                                           |
| 3610139 | 0.04330814  | up | 1.2321249 | Ddr1          | 12305  | Mus musculus discoidin domain receptor family, member 1 (Ddr1), transcript variant 1, mRNA.                                                        |
| 5550681 | 0.04330814  | up | 1.2321084 | Zxdc          | 80292  | Mus musculus ZXD family zinc finger C (Zxdc), transcript variant 1, mRNA.                                                                          |
| 5050431 | 0.020921338 | up | 1.2319015 | Cd37          | 12493  | Mus musculus CD37 antigen (Cd37), mRNA.                                                                                                            |
| 3140646 | 0.04330814  | up | 1.2318968 | Irf5          | 27056  | Mus musculus interferon regulatory factor 5 (Irf5), mRNA.                                                                                          |
| 2900017 | 0.020921338 | up | 1.2313908 | Dgkg          | 110197 | Mus musculus diacylglycerol kinase, gamma (Dgkg), mRNA.                                                                                            |
| 7550445 | 0.04330814  | up | 1.2311361 | Acbd4         | 67131  | Mus musculus acyl-Coenzyme A binding domain containing 4 (Acbd4), transcript variant 1, mRNA.                                                      |
| 6550392 | 0.04330814  | up | 1.2310605 | Unc119b       | 106840 | Mus musculus unc-119 homolog B (C. elegans) (Unc119b), mRNA.                                                                                       |
| 4250148 | 0.04330814  | up | 1.2310041 | Tmod4         | 50874  | Mus musculus tropomodulin 4 (Tmod4), mRNA.                                                                                                         |
| 1710754 | 0.020921338 | up | 1.2306019 | Ctsc          | 13032  | Mus musculus cathepsin C (Ctsc), mRNA.                                                                                                             |
| 1850504 | 0.020921338 | up | 1.2305259 | Aup1          | 11993  | Mus musculus ancient ubiquitous protein 1 (Aup1), mRNA.                                                                                            |
| 5390603 | 0.020921338 | up | 1.2300735 | Bcl9          | 77578  | Mus musculus B-cell CLL/lymphoma 9 (Bcl9), mRNA.                                                                                                   |
| 7400343 | 0.020921338 | up | 1.2299155 | Cog2          | 76332  | Mus musculus component of oligomeric golgi complex 2 (Cog2), mRNA.                                                                                 |
| 5490670 | 0.04330814  | up | 1.2297422 | 1700023M03Rik |        |                                                                                                                                                    |
| 1230379 | 0.04330814  | up | 1.2295914 | Smarcad1      | 13990  | Mus musculus SWI/SNF-related, matrix-associated actin-dependent regulator of chromatin, subfamily a, containing DEAD/H box 1 (Smarcad1), mRNA.     |
| 2970273 | 0.04330814  | up | 1.2295736 | Klc4          | 74764  | Mus musculus kinesin light chain 4 (Klc4), mRNA.                                                                                                   |
| 2480114 | 0.04330814  | up | 1.2294548 | Abl1          | 11350  | Mus musculus v-abl Abelson murine leukemia oncogene 1 (Abl1), mRNA.                                                                                |
| 520039  | 0.020921338 | up | 1.2293999 | Fln           | 216805 | Mus musculus folliculin (Fln), mRNA.                                                                                                               |
| 2850626 | 0.04330814  | up | 1.2291553 | Marco         |        |                                                                                                                                                    |
| 4760754 | 0.020921338 | up | 1.2289224 | Nutf2         | 68051  | Mus musculus nuclear transport factor 2 (Nutf2), mRNA.                                                                                             |
| 450196  | 0.020921338 | up | 1.2288895 | Mtif3         | 76366  | Mus musculus mitochondrial translational initiation factor 3 (Mtif3), nuclear gene encoding mitochondrial protein, mRNA.                           |
| 4860133 | 0.020921338 | up | 1.228748  | C230096C10Rik | 230866 | Mus musculus RIKEN cDNA C230096C10 gene (C230096C10Rik), transcript variant 1, mRNA.                                                               |
| 7050056 | 0.020921338 | up | 1.2278398 | Crtap         | 56693  | Mus musculus cartilage associated protein (Crtap), mRNA.                                                                                           |
| 3940438 | 0.020921338 | up | 1.2269374 | Exoc8         | 102058 | Mus musculus exocyst complex component 8 (Exoc8), mRNA.                                                                                            |
| 6250390 | 0.020921338 | up | 1.2262179 | Chic1         | 12212  | Mus musculus cysteine-rich hydrophobic domain 1 (Chic1), mRNA.                                                                                     |
| 1770546 | 0.020921338 | up | 1.2261934 | Baz2a         | 116848 | Mus musculus bromodomain adjacent to zinc finger domain, 2A (Baz2a), mRNA.                                                                         |
| 1190719 | 0.04330814  | up | 1.2250007 | Ctso          | 229445 | Mus musculus cathepsin O (Ctso), mRNA.                                                                                                             |
| 4060494 | 0.020921338 | up | 1.2242861 | Gtpbp3        | 70359  | Mus musculus GTP binding protein 3 (Gtpbp3), nuclear gene encoding mitochondrial protein, mRNA.                                                    |
| 6590441 | 0.020921338 | up | 1.2239774 | 1500010J02Rik | 68964  | Mus musculus RIKEN cDNA 1500010J02 gene (1500010J02Rik), transcript variant 1, mRNA.                                                               |
| 3990477 | 0.020921338 | up | 1.2236962 | Tpi1          | 21991  | Mus musculus triosephosphate isomerase 1 (Tpi1), mRNA.                                                                                             |
| 7100128 | 0.04330814  | up | 1.2236694 | Slc22a18      | 18400  | Mus musculus solute carrier family 22 (organic cation transporter), member 18 (Slc22a18), transcript variant 1, mRNA.                              |
| 3060497 | 0.020921338 | up | 1.2235498 | Ctnnb1        | 12387  | Mus musculus catenin (cadherin associated protein), beta 1 (Ctnnb1), mRNA.                                                                         |

|         |             |    |           |               |           |                                                                                                                                   |
|---------|-------------|----|-----------|---------------|-----------|-----------------------------------------------------------------------------------------------------------------------------------|
| 3930196 | 0.020921338 | up | 1.2233217 | Ncapd2        | 68298     | Mus musculus non-SMC condensin I complex, subunit D2 (Ncapd2), mRNA.                                                              |
| 5130767 | 0.020921338 | up | 1.2227483 | Man1c1        | 230815    | Mus musculus mannosidase, alpha, class 1C, member 1 (Man1c1), mRNA.                                                               |
| 1940594 | 0.020921338 | up | 1.2222896 | Ssh3          | 245857    | Mus musculus slingshot homolog 3 (Drosophila) (Ssh3), mRNA.                                                                       |
| 3850703 | 0.04330814  | up | 1.2219595 | Kctd12b       | 207474    | Mus musculus potassium channel tetramerisation domain containing 12b (Kctd12b), mRNA.                                             |
| 2710019 | 0.020921338 | up | 1.2217664 | Mobk12b       | 214944    | Mus musculus MOB1, Mps One Binder kinase activator-like 2B (yeast) (Mobk12b), mRNA.                                               |
| 2680450 | 0.04330814  | up | 1.2208477 | Cdan1         | 68968     | Mus musculus congenital dyserythropoietic anemia, type I (human) (Cdan1), mRNA. XM_925221 XM_985468 XM_985530 XM_985568           |
| 6290356 | 0.020921338 | up | 1.2208192 | Ermp1         | 226090    | Mus musculus endoplasmic reticulum metallopeptidase 1 (Ermp1), mRNA.                                                              |
| 6980273 | 0.04330814  | up | 1.2204258 | Ctdspl        | 69274     | Mus musculus CTD (carboxy-terminal domain, RNA polymerase II, polypeptide A) small phosphatase-like (Ctdspl), mRNA.               |
| 4730639 | 0.020921338 | up | 1.220409  | Aspscr1       | 68938     | Mus musculus alveolar soft part sarcoma chromosome region, candidate 1 (human) (Aspscr1), transcript variant 2, mRNA.             |
| 4670348 | 0.020921338 | up | 1.2203882 | Eif4enif1     | 74203     | Mus musculus eukaryotic translation initiation factor 4E nuclear import factor 1 (Eif4enif1), mRNA.                               |
| 70603   | 0.020921338 | up | 1.2199265 | Alg3          | 208624    | Mus musculus asparagine-linked glycosylation 3 homolog (yeast, alpha-1,3-mannosyltransferase) (Alg3), mRNA.                       |
| 6840300 | 0.020921338 | up | 1.2198533 | Mak10         | 78689     | Mus musculus MAK10 homolog, amino-acid N-acetyltransferase subunit, (S. cerevisiae) (Mak10), mRNA.                                |
| 5820341 | 0.020921338 | up | 1.2187843 | Nucb1         | 18220     | Mus musculus nucleobindin 1 (Nucb1), mRNA.                                                                                        |
| 5720020 | 0.020921338 | up | 1.2184201 | Pde4dip       | 83679     | Mus musculus phosphodiesterase 4D interacting protein (myomegalin) (Pde4dip), transcript variant 2, mRNA.                         |
| 2970452 | 0.020921338 | up | 1.2183515 | Cdc5l         | 71702     | Mus musculus cell division cycle 5-like (S. pombe) (Cdc5l), mRNA.                                                                 |
| 7560195 | 0.04330814  | up | 1.2180294 | Frs2          | 327826    | Mus musculus fibroblast growth factor receptor substrate 2 (Frs2), mRNA.                                                          |
| 4780326 | 0.020921338 | up | 1.2167174 | ORF19         | 68767     | Mus musculus open reading frame 19 (ORF19), transcript variant 1, mRNA.                                                           |
| 780619  | 0.04330814  | up | 1.2160568 | Tirap         | 117149    | Mus musculus toll-interleukin 1 receptor (TIR) domain-containing adaptor protein (Tirap), mRNA.                                   |
| 2690377 | 0.020921338 | up | 1.21586   | Pfdn4         | 109054    | Mus musculus prefoldin 4 (Pfdn4), transcript variant 2, mRNA.                                                                     |
| 6270020 | 0.020921338 | up | 1.2156771 | Mrps25        | 64658     | Mus musculus mitochondrial ribosomal protein S25 (Mrps25), nuclear gene encoding mitochondrial protein, mRNA.                     |
| 7050180 | 0.020921338 | up | 1.2152965 | Sgsm2         | 97761     | Mus musculus small G protein signaling modulator 2 (Sgsm2), mRNA.                                                                 |
| 5290242 | 0.04330814  | up | 1.2152673 | Kremen2       | 73016     | Mus musculus kringle containing transmembrane protein 2 (Kremen2), mRNA.                                                          |
| 6180022 | 0.020921338 | up | 1.2152622 | Wdr33         | 74320     | Mus musculus WD repeat domain 33 (Wdr33), mRNA.                                                                                   |
| 6620209 | 0.020921338 | up | 1.2150869 | Rad52         | 19365     | Mus musculus RAD52 homolog (S. cerevisiae) (Rad52), mRNA.                                                                         |
| 3060349 | 0.04330814  | up | 1.215071  | Ankrd39       | 109346    | Mus musculus ankyrin repeat domain 39 (Ankrd39), mRNA.                                                                            |
| 3400097 | 0.020921338 | up | 1.214891  | Fam169b       | 434197    | Mus musculus family with sequence similarity 169, member B (Fam169b), mRNA.                                                       |
| 7400598 | 0.020921338 | up | 1.2147833 | Sec62         | 69276     | Mus musculus SEC62 homolog (S. cerevisiae) (Sec62), mRNA.                                                                         |
| 1500608 | 0.04330814  | up | 1.2147257 | Atp6v1d       | 73834     | Mus musculus ATPase, H+ transporting, lysosomal V1 subunit D (Atp6v1d), mRNA.                                                     |
| 1110349 | 0.04330814  | up | 1.214719  | A330049M08Rik |           |                                                                                                                                   |
| 1230458 | 0.020921338 | up | 1.214437  | Tbx6          | 21389     | Mus musculus T-box 6 (Tbx6), mRNA.                                                                                                |
| 6580731 | 0.020921338 | up | 1.2139585 | Prmt2         | 15468     | Mus musculus protein arginine N-methyltransferase 2 (Prmt2), transcript variant 2, mRNA.                                          |
| 3840554 | 0.020921338 | up | 1.2133238 | Cnot3         | 232791    | Mus musculus CCR4-NOT transcription complex, subunit 3 (Cnot3), mRNA.                                                             |
| 6290719 | 0.04330814  | up | 1.2130649 | Farsb         | 23874     | Mus musculus phenylalanyl-tRNA synthetase, beta subunit (Farsb), mRNA.                                                            |
| 5870370 | 0.04330814  | up | 1.2126149 | Ctnnb1        | 12387     | Mus musculus catenin (cadherin associated protein), beta 1 (Ctnnb1), mRNA.                                                        |
| 5570088 | 0.04330814  | up | 1.2124363 | Zdhhc6        | 66980     | Mus musculus zinc finger, DHHC domain containing 6 (Zdhhc6), transcript variant 2, mRNA.                                          |
| 7510750 | 0.020921338 | up | 1.2120025 | LOC100046891  | 100046891 | PREDICTED: Mus musculus similar to Smad5 (LOC100046891), misc RNA.                                                                |
| 4890291 | 0.04330814  | up | 1.2117069 | Rbl1          | 19650     | Mus musculus retinoblastoma-like 1 (p107) (Rbl1), mRNA.                                                                           |
| 830221  | 0.020921338 | up | 1.2116436 | Mrpl1         | 94061     | Mus musculus mitochondrial ribosomal protein L1 (Mrpl1), nuclear gene encoding mitochondrial protein, transcript variant 1, mRNA. |
| 1230201 | 0.020921338 | up | 1.2114586 | Creb3l2       | 208647    | Mus musculus cAMP responsive element binding protein 3-like 2 (Creb3l2), mRNA.                                                    |
| 2190347 | 0.04330814  | up | 1.2114482 | D14Ert231e    | 210925    | Mus musculus DNA segment, Chr 14, ERATO Doi 231, expressed (D14Ert231e), mRNA.                                                    |
| 50446   | 0.020921338 | up | 1.2113978 | Gins3         | 78833     | Mus musculus GINS complex subunit 3 (Psf3 homolog) (Gins3), mRNA.                                                                 |
| 1820450 | 0.04330814  | up | 1.211114  | Tcfe3         | 209446    | Mus musculus transcription factor E3 (Tcfe3), mRNA.                                                                               |
| 3870164 | 0.020921338 | up | 1.2109699 | Irgq          | 210146    | Mus musculus immunity-related GTPase family, Q (Irgq), mRNA.                                                                      |
| 870468  | 0.04330814  | up | 1.210752  | Map3k12       | 26404     | Mus musculus mitogen-activated protein kinase kinase kinase 12 (Map3k12), mRNA.                                                   |
| 5820681 | 0.020921338 | up | 1.2107357 | PrkcZ         | 18762     | Mus musculus protein kinase C, zeta (PrkcZ), transcript variant 1, mRNA.                                                          |
| 5050156 | 0.020921338 | up | 1.2104957 | Lrrc24        | 378937    | Mus musculus leucine rich repeat containing 24 (Lrrc24), mRNA.                                                                    |

|         |             |    |           |               |           |                                                                                                                                                              |
|---------|-------------|----|-----------|---------------|-----------|--------------------------------------------------------------------------------------------------------------------------------------------------------------|
| 4900463 | 0.04330814  | up | 1.2102265 | Timm9         | 30056     | Mus musculus translocase of inner mitochondrial membrane 9 homolog (yeast) (Timm9), nuclear gene encoding mitochondrial protein, transcript variant 2, mRNA. |
| 5270762 | 0.020921338 | up | 1.2101194 | 1700052N19Rik | 73419     | Mus musculus RIKEN cDNA 1700052N19 gene (1700052N19Rik), mRNA.<br>XM_974009 XM_982948                                                                        |
| 3130707 | 0.020921338 | up | 1.2100399 | Pdgfb         |           |                                                                                                                                                              |
| 7560730 | 0.020921338 | up | 1.2098892 | Btbd6         | 399566    | Mus musculus BTB (POZ) domain containing 6 (Btbd6), mRNA.                                                                                                    |
| 1710369 | 0.020921338 | up | 1.2093797 | Sep-03        | 24050     | Mus musculus septin 3 (Sept3), mRNA.                                                                                                                         |
| 2970519 | 0.04330814  | up | 1.20924   | Actl6a        | 56456     | Mus musculus actin-like 6A (Actl6a), mRNA.                                                                                                                   |
| 6520739 | 0.04330814  | up | 1.2091954 | Twf2          | 23999     | Mus musculus twinfilin, actin-binding protein, homolog 2 (Drosophila) (Twf2), mRNA.                                                                          |
| 5340056 | 0.020921338 | up | 1.2091522 | St3gal2       | 20444     | Mus musculus ST3 beta-galactoside alpha-2,3-sialyltransferase 2 (St3gal2), transcript variant 2, mRNA.                                                       |
| 6110048 | 0.020921338 | up | 1.2087464 | Rdbp          | 27632     | Mus musculus RD RNA-binding protein (Rdbp), transcript variant 3, mRNA.                                                                                      |
| 4200669 | 0.020921338 | up | 1.2085413 | Grk5          | 14773     | Mus musculus G protein-coupled receptor kinase 5 (Grk5), mRNA.                                                                                               |
| 6580100 | 0.020921338 | up | 1.2084575 | Spg20         |           |                                                                                                                                                              |
| 2370768 | 0.020921338 | up | 1.207575  | Bcl9l         | 80288     | Mus musculus B-cell CLL/lymphoma 9-like (Bcl9l), mRNA.                                                                                                       |
| 4560497 | 0.04330814  | up | 1.2073435 | Dos           | 216164    | Mus musculus downstream of Stk11 (Dos), mRNA.                                                                                                                |
| 6550768 | 0.04330814  | up | 1.2072018 | Tmem107       | 66910     | Mus musculus transmembrane protein 107 (Tmem107), transcript variant 1, mRNA.                                                                                |
| 6770259 | 0.020921338 | up | 1.2067393 | LOC435565     | 435565    | Mus musculus similar to interferon-inducible GTPase (LOC435565), mRNA.                                                                                       |
| 3060482 | 0.020921338 | up | 1.2066945 | Irf9          | 16391     | Mus musculus interferon regulatory factor 9 (Irf9), mRNA.                                                                                                    |
| 4150008 | 0.04330814  | up | 1.2062501 | Igf2r         | 16004     | Mus musculus insulin-like growth factor 2 receptor (Igf2r), mRNA.                                                                                            |
| 10634   | 0.04330814  | up | 1.2061883 | Dyrk1b        | 13549     | Mus musculus dual-specificity tyrosine-(Y)-phosphorylation regulated kinase 1b (Dyrk1b), transcript variant 1, mRNA.                                         |
| 7320670 | 0.04330814  | up | 1.2060624 | Xkr7          | 228787    | Mus musculus X Kell blood group precursor related family member 7 homolog (Xkr7), mRNA.                                                                      |
| 4540523 | 0.04330814  | up | 1.2060158 | Nek3          | 23954     | Mus musculus NIMA (never in mitosis gene a)-related expressed kinase 3 (Nek3), mRNA.                                                                         |
| 6940475 | 0.017248742 | up | 1.2058938 | LOC100042427  | 100042427 | PREDICTED: Mus musculus similar to Glyceraldehyde-3-phosphate dehydrogenase (GAPDH), transcript variant 4 (LOC100042427), mRNA.                              |
| 5310427 | 0.04330814  | up | 1.2058614 | Mta1          | 116870    | Mus musculus metastasis associated 1 (Mta1), mRNA.                                                                                                           |
| 5050669 | 0.020921338 | up | 1.2056662 | Wfs1          | 22393     | Mus musculus Wolfram syndrome 1 homolog (human) (Wfs1), mRNA.                                                                                                |
| 780050  | 0.020921338 | up | 1.205409  | Armcx1        | 78248     | Mus musculus armadillo repeat containing, X-linked 1 (Armcx1), mRNA.                                                                                         |
| 4850605 | 0.04330814  | up | 1.2053927 | Lamb3         | 16780     | Mus musculus laminin, beta 3 (Lamb3), mRNA.                                                                                                                  |
| 3390576 | 0.020921338 | up | 1.2051039 | Centg3        |           |                                                                                                                                                              |
| 3310767 | 0.04330814  | up | 1.2048513 | Cul4b         | 72584     | Mus musculus cullin 4B (Cul4b), mRNA.                                                                                                                        |
| 4830687 | 0.020921338 | up | 1.2048314 | F630043A04Rik | 219114    | Mus musculus RIKEN cDNA F630043A04 gene (F630043A04Rik), mRNA.                                                                                               |
| 670528  | 0.020921338 | up | 1.2046489 | Nr1h2         | 22260     | Mus musculus nuclear receptor subfamily 1, group H, member 2 (Nr1h2), mRNA.                                                                                  |
| 2140403 | 0.020921338 | up | 1.2043788 | C230052112Rik | 101831    | Mus musculus RIKEN cDNA C230052112 gene (C230052112Rik), mRNA.                                                                                               |
| 4070603 | 0.020921338 | up | 1.2040856 | Zfp760        | 240034    | Mus musculus zinc finger protein 760 (Zfp760), mRNA.                                                                                                         |
| 7610338 | 0.020921338 | up | 1.2039807 | Msh6          | 17688     | Mus musculus mutS homolog 6 (E. coli) (Msh6), mRNA.                                                                                                          |
| 2100747 | 0.020921338 | up | 1.203878  | Mical1        | 171580    | Mus musculus microtubule associated monooxygenase, calponin and LIM domain containing 1 (Mical1), mRNA.                                                      |
| 4810494 | 0.020921338 | up | 1.2036648 | Dph2          | 67728     | Mus musculus DPH2 homolog (S. cerevisiae) (Dph2), mRNA.                                                                                                      |
| 6760377 | 0.04330814  | up | 1.2031991 | Terf2         | 21750     | Mus musculus telomeric repeat binding factor 2 (Terf2), mRNA.                                                                                                |
| 840397  | 0.04330814  | up | 1.2030865 | Ppp1r16b      | 228852    | Mus musculus protein phosphatase 1, regulatory (inhibitor) subunit 16B (Ppp1r16b), mRNA.                                                                     |
| 6220484 | 0.020921338 | up | 1.2030476 | Rfxank        | 19727     | Mus musculus regulatory factor X-associated ankyrin-containing protein (Rfxank), transcript variant 2, mRNA.                                                 |
| 510301  | 0.04330814  | up | 1.2029912 | Uck1          | 22245     | Mus musculus uridine-cytidine kinase 1 (Uck1), mRNA.                                                                                                         |
| 4230615 | 0.020921338 | up | 1.2022283 | Pik3ca        | 18706     | Mus musculus phosphatidylinositol 3-kinase, catalytic, alpha polypeptide (Pik3ca), mRNA.                                                                     |
| 6590450 | 0.020921338 | up | 1.202001  | Ppap2c        | 50784     | Mus musculus phosphatidic acid phosphatase type 2c (Ppap2c), mRNA.                                                                                           |
| 6250605 | 0.04330814  | up | 1.2018721 | Tufm          | 233870    | Mus musculus Tu translation elongation factor, mitochondrial (Tufm), nuclear gene encoding mitochondrial protein, mRNA.                                      |
| 5700279 | 0.04330814  | up | 1.2016165 | Dut           | 110074    | Mus musculus deoxyuridine triphosphatase (Dut), nuclear gene encoding mitochondrial protein, mRNA.                                                           |
| 5810538 | 0.020921338 | up | 1.2013376 | Ccdc80        | 67896     | Mus musculus coiled-coil domain containing 80 (Ccdc80), mRNA.                                                                                                |
| 1450095 | 0.04330814  | up | 1.201289  | Icam1         | 15894     | Mus musculus intercellular adhesion molecule 1 (Icam1), mRNA.                                                                                                |
| 5810561 | 0.020921338 | up | 1.2004755 | Cobl          |           |                                                                                                                                                              |
| 5080338 | 0.04330814  | up | 1.2004286 | Bcl2l2        | 12050     | Mus musculus BCL2-like 2 (Bcl2l2), mRNA.                                                                                                                     |
| 2940739 | 0.020921338 | up | 1.2002007 | Oxr1          | 170719    | Mus musculus oxidation resistance 1 (Oxr1), transcript variant 1, mRNA.                                                                                      |
| 670707  | 0.020921338 | up | 1.2000401 | Ttc3          | 22129     | Mus musculus tetratricopeptide repeat domain 3 (Ttc3), mRNA.                                                                                                 |
| 2370370 | 0.04330814  | up | 1.1994591 | Rbx1          | 56438     | Mus musculus ring-box 1 (Rbx1), mRNA.                                                                                                                        |
| 6290411 | 0.020921338 | up | 1.1993483 | Pank1         | 75735     | Mus musculus pantothenate kinase 1 (Pank1), transcript variant 2, mRNA.                                                                                      |
| 3360400 | 0.020921338 | up | 1.1992555 | Chek2         | 50883     | Mus musculus CHK2 checkpoint homolog (S. pombe) (Chek2), mRNA.                                                                                               |
| 650164  | 0.020921338 | up | 1.1987358 | 2310008H09Rik | 66356     | Mus musculus RIKEN cDNA 2310008H09 gene (2310008H09Rik), mRNA.                                                                                               |
| 290296  | 0.04330814  | up | 1.1985751 | 1110057K04Rik | 68832     | Mus musculus RIKEN cDNA 1110057K04 gene (1110057K04Rik), mRNA.                                                                                               |
| 2510184 | 0.020921338 | up | 1.1981627 | BC024868      | 232947    | Mus musculus cDNA sequence BC024868 (BC024868), mRNA.                                                                                                        |
| 1580356 | 0.020921338 | up | 1.1980896 | Foxm1         | 14235     | Mus musculus forkhead box M1 (Foxm1), mRNA.                                                                                                                  |

|         |             |    |           |               |        |                                                                                                                                          |
|---------|-------------|----|-----------|---------------|--------|------------------------------------------------------------------------------------------------------------------------------------------|
| 650411  | 0.020921338 | up | 1.1978568 | Rdh11         | 17252  | Mus musculus retinol dehydrogenase 11 (Rdh11), mRNA.                                                                                     |
| 4050603 | 0.04330814  | up | 1.197624  | Eef1d         | 66656  | Mus musculus eukaryotic translation elongation factor 1 delta (guanine nucleotide exchange protein) (Eef1d), transcript variant 2, mRNA. |
| 2490541 | 0.04330814  | up | 1.19752   | Repin1        | 58887  | Mus musculus replication initiator 1 (Repin1), transcript variant 4, mRNA.                                                               |
| 2970609 | 0.020921338 | up | 1.1975086 | Mtmr11        | 194126 | Mus musculus myotubularin related protein 11 (Mtmr11), mRNA.                                                                             |
| 4760075 | 0.020921338 | up | 1.1974076 | 4432405B04Rik | 67978  | Mus musculus RIKEN cDNA 4432405B04 gene (4432405B04Rik), mRNA.                                                                           |
| 5670458 | 0.04330814  | up | 1.1973995 | Rad50         | 19360  | Mus musculus RAD50 homolog ( <i>S. cerevisiae</i> ) (Rad50), mRNA.                                                                       |
| 940154  | 0.020921338 | up | 1.1972265 | Scn1b         | 20266  | Mus musculus sodium channel, voltage-gated, type I, beta (Scn1b), mRNA.                                                                  |
| 2760131 | 0.020921338 | up | 1.1971122 | 2410042D21Rik | 72425  | Mus musculus RIKEN cDNA 2410042D21 gene (2410042D21Rik), mRNA.                                                                           |
| 6980022 | 0.020921338 | up | 1.1969316 | Cetn4         | 207175 | Mus musculus centrin 4 (Cetn4), mRNA.                                                                                                    |
| 3360139 | 0.020921338 | up | 1.1967143 | Pigc          | 67292  | Mus musculus phosphatidylinositol glycan anchor biosynthesis, class C (Pigc), transcript variant 1, mRNA.                                |
| 6980010 | 0.020921338 | up | 1.1966653 | Parp1         | 11545  | Mus musculus poly (ADP-ribose) polymerase family, member 1 (Parp1), mRNA.                                                                |
| 6560152 | 0.04330814  | up | 1.1966078 | Ndufa5        | 68202  | Mus musculus NADH dehydrogenase (ubiquinone) 1 alpha subcomplex, 5 (Ndufa5), nuclear gene encoding mitochondrial protein, mRNA.          |
| 1430132 | 0.020921338 | up | 1.1963068 | 4831426I19Rik | 212073 | Mus musculus RIKEN cDNA 4831426I19 gene (4831426I19Rik), transcript variant 2, mRNA.                                                     |
| 6220632 | 0.04330814  | up | 1.1961927 | Mtap2         | 17756  | Mus musculus microtubule-associated protein 2 (Mtap2), transcript variant 2, mRNA.                                                       |
| 6040050 | 0.020921338 | up | 1.1960746 | Atg4c         | 242557 | Mus musculus autophagy-related 4C (yeast) (Atg4c), mRNA.                                                                                 |
| 3290209 | 0.04330814  | up | 1.19597   | Col7a1        | 12836  | Mus musculus collagen, type VII, alpha 1 (Col7a1), mRNA.                                                                                 |
| 4560634 | 0.020921338 | up | 1.1957844 | Bmyc          | 107771 | Mus musculus brain expressed myelocytomatosis oncogene (Bmyc), mRNA.                                                                     |
| 6620064 | 0.04330814  | up | 1.1957772 | Habp4         |        |                                                                                                                                          |
| 840692  | 0.020921338 | up | 1.1954528 | Rhbdd3        | 279766 | Mus musculus rhomboid domain containing 3 (Rhbdd3), mRNA.                                                                                |
| 7330343 | 0.020921338 | up | 1.1953311 | Csnk1g2       | 103236 | Mus musculus casein kinase 1, gamma 2 (Csnk1g2), mRNA.                                                                                   |
| 2630619 | 0.04330814  | up | 1.1952797 | Vps33a        | 77573  | Mus musculus vacuolar protein sorting 33A (yeast) (Vps33a), mRNA.                                                                        |
| 3290292 | 0.04330814  | up | 1.1951627 | Mx1           | 17857  | Mus musculus myxovirus (influenza virus) resistance 1 (Mx1), mRNA.                                                                       |
| 150474  | 0.020921338 | up | 1.1948123 | 4933426M11Rik | 217684 | Mus musculus RIKEN cDNA 4933426M11 gene (4933426M11Rik), mRNA.                                                                           |
| 5900017 | 0.020921338 | up | 1.1946946 | Rbm18         | 67889  | Mus musculus RNA binding motif protein 18 (Rbm18), mRNA.                                                                                 |
| 2030452 | 0.020921338 | up | 1.194449  | Txndc11       | 106200 | Mus musculus thioredoxin domain containing 11 (Txndc11), transcript variant 2, mRNA.                                                     |
| 2030259 | 0.020921338 | up | 1.1944488 | Depdc5        | 277854 | Mus musculus DEP domain containing 5 (Depdc5), transcript variant 1, mRNA.                                                               |
| 1090347 | 0.020921338 | up | 1.1944449 | Six5          | 20475  | Mus musculus sine oculis-related homeobox 5 homolog ( <i>Drosophila</i> ) (Six5), mRNA.                                                  |
| 1400110 | 0.020921338 | up | 1.194112  | Mepce         | 231803 | Mus musculus methylphosphate capping enzyme (Mepce), mRNA.                                                                               |
| 3450202 | 0.020921338 | up | 1.1939777 | Ssrp1         | 20833  | Mus musculus structure specific recognition protein 1 (Ssrp1), mRNA.                                                                     |
| 2470239 | 0.04330814  | up | 1.1938808 | Mpp2          | 50997  | Mus musculus membrane protein, palmitoylated 2 (MAGUK p55 subfamily member 2) (Mpp2), mRNA.                                              |
| 4890162 | 0.04330814  | up | 1.193625  | Mfsd10        | 68294  | Mus musculus major facilitator superfamily domain containing 10 (Mfsd10), mRNA.                                                          |
| 3890543 | 0.04330814  | up | 1.1934483 | Ubxn6         | 66530  | Mus musculus UBX domain protein 6 (Ubxn6), mRNA.                                                                                         |
| 6590544 | 0.04330814  | up | 1.1927161 | Steap4        | 117167 | Mus musculus STEAP family member 4 (Steap4), mRNA.                                                                                       |
| 4850241 | 0.04330814  | up | 1.19258   | Zfyve1        | 217695 | Mus musculus zinc finger, FYVE domain containing 1 (Zfyve1), mRNA.                                                                       |
| 2100309 | 0.04330814  | up | 1.1924632 | 9630058J23Rik | 226744 | Mus musculus RIKEN cDNA 9630058J23 gene (9630058J23Rik), mRNA.                                                                           |
| 6480441 | 0.04330814  | up | 1.1922466 | A430005L14Rik | 97159  | Mus musculus RIKEN cDNA A430005L14 gene (A430005L14Rik), mRNA.                                                                           |
| 5270100 | 0.04330814  | up | 1.1922139 | 1200002N14Rik | 71712  | Mus musculus RIKEN cDNA 1200002N14 gene (1200002N14Rik), mRNA.                                                                           |
| 1030386 | 0.04330814  | up | 1.192012  | Acp6          | 66659  | Mus musculus acid phosphatase 6, lysophosphatidic (Acp6), mRNA.                                                                          |
| 4730577 | 0.020921338 | up | 1.1915642 | Hipk2         | 15258  | Mus musculus homeodomain interacting protein kinase 2 (Hipk2), mRNA.                                                                     |
| 7510619 | 0.020921338 | up | 1.1910986 | Lpcat3        | 14792  | Mus musculus lysophosphatidylcholine acyltransferase 3 (Lpcat3), mRNA.                                                                   |
| 2140372 | 0.020921338 | up | 1.191073  | Nin           | 18080  | Mus musculus ninein (Nin), transcript variant 1, mRNA.                                                                                   |
| 4920138 | 0.04330814  | up | 1.1909262 | Slc20a1       | 20515  | Mus musculus solute carrier family 20, member 1 (Slc20a1), mRNA.                                                                         |
| 2060487 | 0.04330814  | up | 1.1908053 | Smek2         | 104570 | Mus musculus SMEK homolog 2, suppressor of mek1 ( <i>Dictyostelium</i> ) (Smek2), mRNA.                                                  |
| 5550332 | 0.04330814  | up | 1.1907363 | Chpf          | 74241  | Mus musculus chondroitin polymerizing factor (Chpf), transcript variant 1, mRNA.                                                         |
| 5820598 | 0.020921338 | up | 1.1907191 | 2610028A01Rik | 72400  | Mus musculus RIKEN cDNA 2610028A01 gene (2610028A01Rik), mRNA.                                                                           |
| 4640468 | 0.04330814  | up | 1.1898748 | St7l          | 229681 | Mus musculus suppression of tumorigenicity 7-like (St7l), mRNA.                                                                          |
| 6060730 | 0.020921338 | up | 1.1896123 | Lars2         | 102436 | Mus musculus leucyl-tRNA synthetase, mitochondrial (Lars2), nuclear gene encoding mitochondrial protein, mRNA.                           |
| 3120603 | 0.020921338 | up | 1.1891853 | Zfp770        | 228491 | Mus musculus zinc finger protein 770 (Zfp770), mRNA.                                                                                     |
| 1570202 | 0.04330814  | up | 1.1888791 | Cmas          | 12764  | Mus musculus cytidine monophospho-N-acetylneuraminic acid synthetase (Cmas), mRNA.                                                       |
| 7210669 | 0.04330814  | up | 1.1887766 | Extl1         | 56219  | Mus musculus exostoses (multiple)-like 1 (Extl1), mRNA.                                                                                  |
| 2060192 | 0.04330814  | up | 1.1886666 | Zfp12         | 231866 | Mus musculus zinc finger protein 12 (Zfp12), mRNA.                                                                                       |
| 5910189 | 0.04330814  | up | 1.1886435 | Gabarapl2     | 93739  | Mus musculus gamma-aminobutyric acid (GABA-A) receptor-associated protein-like 2 (Gabarapl2), mRNA.                                      |

|         |             |    |           |               |           |                                                                                                                                |
|---------|-------------|----|-----------|---------------|-----------|--------------------------------------------------------------------------------------------------------------------------------|
| 5270167 | 0.020921338 | up | 1.1885644 | 6330442E10Rik | 268567    | Mus musculus RIKEN cDNA 6330442E10 gene (6330442E10Rik), mRNA.                                                                 |
| 4610113 | 0.020921338 | up | 1.188548  | Ralgps1       | 241308    | Mus musculus Ral GEF with PH domain and SH3 binding motif 1 (Ralgps1), mRNA.                                                   |
| 4730379 | 0.04330814  | up | 1.1883745 | Tmem8         | 60455     | Mus musculus transmembrane protein 8 (five membrane-spanning domains) (Tmem8), mRNA.                                           |
| 2000037 | 0.04330814  | up | 1.1880413 | 1810009N02Rik | 69099     | Mus musculus RIKEN cDNA 1810009N02 gene (1810009N02Rik), mRNA.                                                                 |
| 50608   | 0.020921338 | up | 1.1876687 | 2210412D01Rik | 70178     | Mus musculus RIKEN cDNA 2210412D01 gene (2210412D01Rik), mRNA.                                                                 |
| 1010324 | 0.04330814  | up | 1.1876144 | LOC100048313  | 100048313 | PREDICTED: Mus musculus similar to ABC transporter, transcript variant 1 (LOC100048313), mRNA.                                 |
| 940291  | 0.04330814  | up | 1.1875337 | Kif2a         | 16563     | Mus musculus kinesin family member 2A (Kif2a), mRNA.                                                                           |
| 4780411 | 0.020921338 | up | 1.1872935 | Rbm15         | 229700    | Mus musculus RNA binding motif protein 15 (Rbm15), mRNA.                                                                       |
| 3840113 | 0.020921338 | up | 1.1872144 | Nlr1          | 270151    | Mus musculus NLR family member X1 (Nlr1), mRNA.                                                                                |
| 1450164 | 0.04330814  | up | 1.1871657 | Ttc23         | 67009     | Mus musculus tetratricopeptide repeat domain 23 (Ttc23), mRNA.                                                                 |
| 4490053 | 0.020921338 | up | 1.1869841 | Cog4          | 102339    | Mus musculus component of oligomeric golgi complex 4 (Cog4), mRNA.                                                             |
| 4480228 | 0.04330814  | up | 1.1863154 | Nomo1         | 211548    | Mus musculus nodal modulator 1 (Nomo1), mRNA.                                                                                  |
| 780324  | 0.04330814  | up | 1.1862823 | Tctn3         | 67590     | Mus musculus tectonic family member 3 (Tctn3), mRNA.                                                                           |
| 7610133 | 0.04330814  | up | 1.1860868 | Mtap6         | 17760     | Mus musculus microtubule-associated protein 6 (Mtap6), transcript variant 3, mRNA.                                             |
| 1090288 | 0.020921338 | up | 1.1860089 | Neo1          |           |                                                                                                                                |
| 3290296 | 0.020921338 | up | 1.1853118 | Top1mt        | 72960     | Mus musculus DNA topoisomerase 1, mitochondrial (Top1mt), mRNA.                                                                |
| 7000403 | 0.020921338 | up | 1.1851655 | Atpbd3        | 233189    | Mus musculus ATP binding domain 3 (Atpbd3), mRNA.                                                                              |
| 6380349 | 0.04330814  | up | 1.1847544 | Palm          | 18483     | Mus musculus paralemmin (Palm), mRNA.                                                                                          |
| 6270482 | 0.04330814  | up | 1.1842172 | 0610025P10Rik | 216860    | Mus musculus RIKEN cDNA 0610025P10 gene (0610025P10Rik), mRNA.                                                                 |
| 6270037 | 0.04330814  | up | 1.1837306 | Susd2         | 71733     | Mus musculus sushi domain containing 2 (Susd2), mRNA.                                                                          |
| 4040441 | 0.04330814  | up | 1.18346   | 5930431H10    |           |                                                                                                                                |
| 2450592 | 0.020921338 | up | 1.1832637 | Zfp566        | 72556     | Mus musculus zinc finger protein 566 (Zfp566), mRNA.                                                                           |
| 6660114 | 0.020921338 | up | 1.1831884 | Spo11         | 26972     | Mus musculus sporulation protein, meiosis-specific, SPO11 homolog ( <i>S. cerevisiae</i> ) (Spo11), mRNA.                      |
| 4480692 | 0.04330814  | up | 1.1830267 | Fancc         | 14088     | Mus musculus Fanconi anemia, complementation group C (Fancc), transcript variant 1, mRNA.                                      |
| 1050619 | 0.042066425 | up | 1.1829503 | Herpud1       | 64209     | Mus musculus homocysteine-inducible, endoplasmic reticulum stress-inducible, ubiquitin-like domain member 1 (Herpud1), mRNA.   |
| 5220132 | 0.020921338 | up | 1.1825796 | Mbtps1        | 56453     | Mus musculus membrane-bound transcription factor peptidase, site 1 (Mbtps1), mRNA.                                             |
| 3290411 | 0.020921338 | up | 1.1825671 | Acox2         | 93732     | Mus musculus acyl-Coenzyme A oxidase 2, branched chain (Acox2), mRNA.                                                          |
| 2850079 | 0.020921338 | up | 1.1825625 | Ubac1         | 98766     | Mus musculus ubiquitin associated domain containing 1 (Ubac1), mRNA.                                                           |
| 1660086 | 0.04330814  | up | 1.1819504 | Purg          | 75029     | Mus musculus purine-rich element binding protein G (Purg), transcript variant 2, mRNA.                                         |
| 2850168 | 0.04330814  | up | 1.1818585 | Zfp771        | 244216    | Mus musculus zinc finger protein 771 (Zfp771), mRNA.                                                                           |
| 3800554 | 0.020921338 | up | 1.1812407 | Mga           |           |                                                                                                                                |
| 780086  | 0.020921338 | up | 1.1811473 | Galnt6        | 207839    | Mus musculus UDP-N-acetyl-alpha-D-galactosamine:polypeptide N-acetylgalactosaminyltransferase 6 (Galnt6), mRNA.                |
| 3850239 | 0.04330814  | up | 1.180848  | Rab35         | 77407     | Mus musculus RAB35, member RAS oncogene family (Rab35), mRNA.                                                                  |
| 2350554 | 0.04330814  | up | 1.1806135 | Rdbp          | 27632     | Mus musculus RD RNA-binding protein (Rdbp), transcript variant 2, mRNA.                                                        |
| 3140408 | 0.04330814  | up | 1.1805245 | Dync1i1       | 13426     | Mus musculus dynein cytoplasmic 1 intermediate chain 1 (Dync1i1), mRNA.                                                        |
| 6270750 | 0.020921338 | up | 1.1802    | Mical1        | 171580    | Mus musculus microtubule associated monooxygenase, calponin and LIM domain containing 1 (Mical1), mRNA.                        |
| 360411  | 0.020921338 | up | 1.1798618 | Sra1          | 24068     | Mus musculus steroid receptor RNA activator 1 (Sra1), mRNA.                                                                    |
| 4890113 | 0.04330814  | up | 1.1798451 | LOC100045567  | 100045567 | PREDICTED: Mus musculus similar to purine nucleoside phosphorylase (LOC100045567), mRNA.                                       |
| 110634  | 0.04330814  | up | 1.1798027 | Kif3c         | 16570     | Mus musculus kinesin family member 3C (Kif3c), mRNA.                                                                           |
| 1230324 | 0.04330814  | up | 1.179645  | 5630401D24Rik | 71449     | Mus musculus RIKEN cDNA 5630401D24 gene (5630401D24Rik), mRNA.                                                                 |
| 2350543 | 0.04330814  | up | 1.1796103 | Psmc3         | 19182     | Mus musculus proteasome (prosome, macropain) 26S subunit, ATPase 3 (Psmc3), mRNA.                                              |
| 2450270 | 0.020921338 | up | 1.17922   | Ckap2l        | 70466     | Mus musculus cytoskeleton associated protein 2-like (Ckap2l), mRNA.                                                            |
| 6420114 | 0.020921338 | up | 1.1791651 | Tnks1bp1      | 228140    | Mus musculus tankyrase 1 binding protein 1 (Tnks1bp1), mRNA.                                                                   |
| 5310376 | 0.020921338 | up | 1.1790104 | Mthfd2        | 17768     | Mus musculus methylenetetrahydrofolate dehydrogenase (NAD+ dependent), methenyltetrahydrofolate cyclohydrolase (Mthfd2), mRNA. |
| 940102  | 0.04330814  | up | 1.1788739 | Pscd3         | 19159     | Mus musculus pleckstrin homology, Sec7 and coiled-coil domains 3 (Pscd3), mRNA.                                                |
| 380523  | 0.04330814  | up | 1.1785455 | VeZF1         | 22344     | Mus musculus vascular endothelial zinc finger 1 (VeZF1), mRNA.                                                                 |
| 6520390 | 0.04330814  | up | 1.1784228 | Zfp61         | 22719     | Mus musculus zinc finger protein 61 (Zfp61), mRNA.                                                                             |
| 4210553 | 0.020921338 | up | 1.1782144 | Ninj1         |           |                                                                                                                                |
| 6250477 | 0.020921338 | up | 1.1778629 | Rora          | 19883     | Mus musculus RAR-related orphan receptor alpha (Rora), mRNA.                                                                   |
| 780215  | 0.020921338 | up | 1.1775893 | Mpv17l        | 93734     | Mus musculus Mpv17 transgene, kidney disease mutant-like (Mpv17l), mRNA.                                                       |
| 5820379 | 0.04330814  | up | 1.1774039 | Recq15        | 170472    | Mus musculus RecQ protein-like 5 (Recq15), mRNA.                                                                               |
| 380739  | 0.020921338 | up | 1.1772867 | Rassf1        | 56289     | Mus musculus Ras association (RalGDS/AF-6) domain family member 1 (Rassf1), mRNA.                                              |
| 6580682 | 0.04330814  | up | 1.1768143 | Foxo1         | 56458     | Mus musculus forkhead box O1 (Foxo1), mRNA.                                                                                    |

|         |             |    |           |                 |           |                                                                                                                             |
|---------|-------------|----|-----------|-----------------|-----------|-----------------------------------------------------------------------------------------------------------------------------|
| 6760605 | 0.020921338 | up | 1.176564  | Ppp1ca          | 19045     | Mus musculus protein phosphatase 1, catalytic subunit, alpha isoform (Ppp1ca), mRNA.                                        |
| 3310017 | 0.04330814  | up | 1.1765584 | Adcy9           | 11515     | Mus musculus adenylate cyclase 9 (Adcy9), mRNA.                                                                             |
| 4880121 | 0.04330814  | up | 1.1764399 | Ino80           | 68142     | Mus musculus INO80 homolog ( <i>S. cerevisiae</i> ) (Ino80), mRNA.                                                          |
| 5960524 | 0.04330814  | up | 1.1763322 | Gas2l1          | 78926     | Mus musculus growth arrest-specific 2 like 1 (Gas2l1), transcript variant beta, mRNA.                                       |
| 6180743 | 0.020921338 | up | 1.1755371 | Lrrc48          | 74665     | Mus musculus leucine rich repeat containing 48 (Lrrc48), mRNA.                                                              |
| 1660541 | 0.020921338 | up | 1.1752639 | Trub1           | 72133     | Mus musculus TruB pseudouridine (psi) synthase homolog 1 ( <i>E. coli</i> ) (Trub1), transcript variant 1, mRNA.            |
| 4560433 | 0.04330814  | up | 1.1750119 | Wbscr22         |           |                                                                                                                             |
| 380482  | 0.04330814  | up | 1.1747581 | MSMUSG000000437 | 677289    | PREDICTED: Mus musculus predicted gene, ENSMUSG00000043795 (ENSMUSG00000043795), mRNA.                                      |
| 5390608 | 0.04330814  | up | 1.1744027 | Gbbp1           | 73274     | Mus musculus GC-rich promoter binding protein 1 (Gbbp1), mRNA.                                                              |
| 6270427 | 0.020921338 | up | 1.1741358 | Gpkow           | 209416    | Mus musculus G patch domain and KOW motifs (Gpkow), mRNA.                                                                   |
| 6250133 | 0.020921338 | up | 1.1741039 | Ccdc91          | 67015     | Mus musculus coiled-coil domain containing 91 (Ccdc91), mRNA.                                                               |
| 630554  | 0.020921338 | up | 1.1740894 | Aof2            | 99982     | Mus musculus amine oxidase (flavin containing) domain 2 (Aof2), mRNA.                                                       |
| 770703  | 0.020921338 | up | 1.174029  | Krtap16-4       | 170654    | Mus musculus keratin associated protein 16-4 (Krtap16-4), mRNA.                                                             |
| 360041  | 0.020921338 | up | 1.1740278 | Ifit2           | 15958     | Mus musculus interferon-induced protein with tetratricopeptide repeats 2 (Ifit2), mRNA.                                     |
| 540519  | 0.020921338 | up | 1.1735611 | Tsn             | 22099     | Mus musculus translin (Tsn), mRNA.                                                                                          |
| 4730088 | 0.04330814  | up | 1.1730243 | Dek             | 110052    | Mus musculus DEK oncogene (DNA binding) (Dek), mRNA.                                                                        |
| 650685  | 0.020921338 | up | 1.1730218 | Zcchc8          | 70650     | Mus musculus zinc finger, CCHC domain containing 8 (Zcchc8), mRNA.                                                          |
| 1820044 | 0.04330814  | up | 1.1728802 | Epm2aip1        | 77781     | Mus musculus EPM2A (laforin) interacting protein 1 (Epm2aip1), mRNA.                                                        |
| 4010554 | 0.04330814  | up | 1.1723973 | LOC100044322    | 100044322 | PREDICTED: Mus musculus similar to UDP-glucose ceramide glucosyltransferase-like 1 (LOC100044322), mRNA.                    |
| 3610435 | 0.020921338 | up | 1.1720914 | 2700097O09Rik   | 72658     | Mus musculus RIKEN cDNA 2700097O09 gene (2700097O09Rik), mRNA.                                                              |
| 7200097 | 0.02940105  | up | 1.171929  | LOC100039571    | 100039571 | PREDICTED: Mus musculus similar to ribosomal protein L23a (LOC100039571), mRNA.                                             |
| 1110192 | 0.020921338 | up | 1.1715949 | Sep-07          | 235072    | Mus musculus septin 7 (Sept7), mRNA.                                                                                        |
| 5690601 | 0.04330814  | up | 1.1715896 | Mad111          | 17120     | Mus musculus mitotic arrest deficient 1-like 1 (Mad111), mRNA.                                                              |
| 6580754 | 0.020921338 | up | 1.1715833 | Rasgrf2         | 19418     | Mus musculus RAS protein-specific guanine nucleotide-releasing factor 2 (Rasgrf2), mRNA.                                    |
| 6110246 | 0.04330814  | up | 1.1715106 | AU022252        | 230696    | Mus musculus expressed sequence AU022252 (AU022252), mRNA.                                                                  |
| 5860767 | 0.04330814  | up | 1.1715035 | Gcs1            | 57377     | Mus musculus glucosidase 1 (Gcs1), mRNA.                                                                                    |
| 1500717 | 0.020921338 | up | 1.1711937 | LOC100048076    | 100048076 | PREDICTED: Mus musculus similar to MAD homolog 4 ( <i>Drosophila</i> ), transcript variant 1 (LOC100048076), mRNA.          |
| 270379  | 0.04330814  | up | 1.1710728 | Mcm6            | 17219     | Mus musculus minichromosome maintenance deficient 6 (MIS5 homolog, <i>S. pombe</i> ) ( <i>S. cerevisiae</i> ) (Mcm6), mRNA. |
| 2100189 | 0.04330814  | up | 1.1710318 | Cnga4           | 233649    | Mus musculus cyclic nucleotide gated channel alpha 4 (Cnga4), mRNA.                                                         |
| 6330048 | 0.020921338 | up | 1.1708047 | 8430410A17Rik   | 232210    | Mus musculus RIKEN cDNA 8430410A17 gene (8430410A17Rik), mRNA.                                                              |
| 1410681 | 0.04330814  | up | 1.1707722 | Smek2           | 104570    | Mus musculus SMEK homolog 2, suppressor of mek1 ( <i>Dictyostelium</i> ) (Smek2), mRNA.                                     |
| 360102  | 0.020921338 | up | 1.1707411 | B4galt3         | 57370     | Mus musculus UDP-Gal:betaGlcNAc beta 1,4-galactosyltransferase, polypeptide 3 (B4galt3), mRNA.                              |
| 3360280 | 0.020921338 | up | 1.1707051 | Zap70           | 22637     | Mus musculus zeta-chain (TCR) associated protein kinase (Zap70), mRNA.                                                      |
| 4120692 | 0.020921338 | up | 1.1706523 | Fahd1           | 68636     | Mus musculus fumarylacetoacetate hydrolase domain containing 1 (Fahd1), nuclear gene encoding mitochondrial protein, mRNA.  |
| 6840435 | 0.020921338 | up | 1.1705519 | Dfna5h          | 54722     | Mus musculus deafness, autosomal dominant 5 homolog (human) (Dfna5h), mRNA.                                                 |
| 7610280 | 0.04330814  | up | 1.170542  | Rundc3b         | 242819    | Mus musculus RUN domain containing 3B (Rundc3b), mRNA.                                                                      |
| 730377  | 0.020921338 | up | 1.1703007 | Kcmf1           |           |                                                                                                                             |
| 1340750 | 0.020921338 | up | 1.1702577 | 2700078K21Rik   |           |                                                                                                                             |
| 4220561 | 0.04330814  | up | 1.170149  | Actr1b          | 226977    | Mus musculus ARP1 actin-related protein 1 homolog B, cetractin beta (yeast) (Actr1b), mRNA.                                 |
| 6580301 | 0.020921338 | up | 1.1700468 | Rab3gap1        | 226407    | Mus musculus RAB3 GTPase activating protein subunit 1 (Rab3gap1), mRNA.                                                     |
| 2360703 | 0.042066425 | up | 1.1698626 | Itga3           | 16400     | Mus musculus integrin alpha 3 (Itga3), mRNA.                                                                                |
| 4880377 | 0.04330814  | up | 1.1698232 | Ifih1           | 71586     | Mus musculus interferon induced with helicase C domain 1 (Ifih1), mRNA.                                                     |
| 2490615 | 0.04330814  | up | 1.1697829 | LOC381066       |           |                                                                                                                             |
| 5270136 | 0.020921338 | up | 1.1697192 | Zbtb3           | 75291     | Mus musculus zinc finger and BTB domain containing 3 (Zbtb3), mRNA.                                                         |
| 6200240 | 0.020921338 | up | 1.1689478 | Abhd6           | 66082     | Mus musculus abhydrolase domain containing 6 (Abhd6), mRNA.                                                                 |
| 6510427 | 0.04330814  | up | 1.1689363 | Zfp523          | 224656    | Mus musculus zinc finger protein 523 (Zfp523), mRNA.                                                                        |
| 1850246 | 0.020921338 | up | 1.1687787 | Luc7l2          | 192196    | Mus musculus LUC7-like 2 ( <i>S. cerevisiae</i> ) (Luc7l2), mRNA.                                                           |
| 5570477 | 0.04330814  | up | 1.1687332 | Mbd4            | 17193     | Mus musculus methyl-CpG binding domain protein 4 (Mbd4), mRNA.                                                              |
| 3870092 | 0.020921338 | up | 1.168395  | Pcyox1l         | 240334    | Mus musculus prenylcysteine oxidase 1 like (Pcyox1l), mRNA.                                                                 |
| 5220373 | 0.020921338 | up | 1.168089  | Inpp5b          | 16330     | Mus musculus inositol polyphosphate-5-phosphatase B (Inpp5b), nuclear gene encoding mitochondrial protein, mRNA.            |
| 6550176 | 0.04330814  | up | 1.1679866 | Gpr35           | 64095     | Mus musculus G protein-coupled receptor 35 (Gpr35), mRNA.                                                                   |
| 6560255 | 0.04330814  | up | 1.1679775 | Tm9sf4          | 99237     | Mus musculus transmembrane 9 superfamily protein member 4 (Tm9sf4), mRNA.                                                   |
| 3870743 | 0.04330814  | up | 1.1671035 | 1810008A18Rik   | 108707    | Mus musculus RIKEN cDNA 1810008A18 gene (1810008A18Rik), mRNA.                                                              |
| 6590189 | 0.020921338 | up | 1.1669674 | 2310002B06Rik   | 53951     | Mus musculus RIKEN cDNA 2310002B06 gene (2310002B06Rik), mRNA.                                                              |

|         |             |    |           |               |           |                                                                                                                                                            |
|---------|-------------|----|-----------|---------------|-----------|------------------------------------------------------------------------------------------------------------------------------------------------------------|
| 270176  | 0.04330814  | up | 1.1669259 | Il2rg         | 16186     | Mus musculus interleukin 2 receptor, gamma chain (Il2rg), mRNA.                                                                                            |
| 3120025 | 0.020921338 | up | 1.1665642 | LOC100040799  | 100040799 | PREDICTED: Mus musculus hypothetical protein LOC100040799 (LOC100040799), mRNA.                                                                            |
| 7150026 | 0.04330814  | up | 1.1665592 | Fam171b       | 241520    | Mus musculus family with sequence similarity 171, member B (Fam171b), mRNA.                                                                                |
| 4810730 | 0.020921338 | up | 1.1664727 | Hspa4l        | 18415     | Mus musculus heat shock protein 4 like (Hspa4l), mRNA.                                                                                                     |
| 940424  | 0.04330814  | up | 1.1663258 | Kcna2         | 16490     | Mus musculus potassium voltage-gated channel, shaker-related subfamily, member 2 (Kcna2), mRNA.                                                            |
| 4070626 | 0.04330814  | up | 1.1662312 | Polb          | 18970     | Mus musculus polymerase (DNA directed), beta (Polb), mRNA.                                                                                                 |
| 5260092 | 0.020921338 | up | 1.1654667 | Gpr162        | 14788     | Mus musculus G protein-coupled receptor 162 (Gpr162), mRNA.                                                                                                |
| 6290373 | 0.020921338 | up | 1.1650975 | Sts           | 20905     | Mus musculus steroid sulfatase (Sts), mRNA.                                                                                                                |
| 610463  | 0.04330814  | up | 1.1650051 | Srxn1         | 76650     | Mus musculus sulfiredoxin 1 homolog (S. cerevisiae) (Srxn1), mRNA.                                                                                         |
| 1170537 | 0.04330814  | up | 1.1649473 | 5730472N09Rik | 108958    | Mus musculus RIKEN cDNA 5730472N09 gene (5730472N09Rik), mRNA.                                                                                             |
| 5130072 | 0.020921338 | up | 1.1647977 | Hivep2        | 15273     | Mus musculus human immunodeficiency virus type I enhancer binding protein 2 (Hivep2), mRNA.                                                                |
| 6130482 | 0.020921338 | up | 1.1647754 | C230078M08Rik | 319749    | Mus musculus RIKEN cDNA C230078M08 gene (C230078M08Rik), mRNA.                                                                                             |
| 5310286 | 0.04330814  | up | 1.1644801 | AI314180      | 230249    | Mus musculus expressed sequence AI314180 (AI314180), mRNA.                                                                                                 |
| 1850468 | 0.020921338 | up | 1.1641103 | Ptptra        | 19262     | Mus musculus protein tyrosine phosphatase, receptor type, A (Ptptra), mRNA.                                                                                |
| 2370047 | 0.04330814  | up | 1.1640399 | Amigo1        | 229715    | Mus musculus adhesion molecule with Ig like domain 1 (Amigo1), mRNA.                                                                                       |
| 1780368 | 0.04330814  | up | 1.1636902 | Phf15         | 76901     | Mus musculus PHD finger protein 15 (Phf15), mRNA.                                                                                                          |
| 3130541 | 0.020921338 | up | 1.1636695 | Ggt1          |           |                                                                                                                                                            |
| 2630427 | 0.020921338 | up | 1.1632357 | BC004701      |           |                                                                                                                                                            |
| 4220209 | 0.04330814  | up | 1.1627945 | BC065397      | 436230    | Mus musculus cDNA sequence BC065397 (BC065397), mRNA.                                                                                                      |
| 7400243 | 0.020921338 | up | 1.1624925 | Rpl27a        | 26451     | Mus musculus ribosomal protein L27a (Rpl27a), mRNA.                                                                                                        |
| 2850075 | 0.04330814  | up | 1.1616706 | Insig2        | 72999     | Mus musculus insulin induced gene 2 (Insig2), mRNA.                                                                                                        |
| 6650215 | 0.04330814  | up | 1.1613978 | Prnpip1       | 140546    | Mus musculus prion protein interacting protein 1 (Prnpip1), mRNA.                                                                                          |
| 2940332 | 0.020921338 | up | 1.1612554 | 2610301B20Rik | 67157     | Mus musculus RIKEN cDNA 2610301B20 gene (2610301B20Rik), mRNA.                                                                                             |
| 4280471 | 0.020921338 | up | 1.1611198 | Tlcd1         | 68385     | Mus musculus TLC domain containing 1 (Tlcd1), mRNA.                                                                                                        |
| 620092  | 0.020921338 | up | 1.1608655 | Hus1          | 15574     | Mus musculus Hus1 homolog (S. pombe) (Hus1), mRNA.                                                                                                         |
| 5670605 | 0.04330814  | up | 1.1608335 | Slc35b4       | 58246     | Mus musculus solute carrier family 35, member B4 (Slc35b4), mRNA.                                                                                          |
| 2140411 | 0.020921338 | up | 1.160828  | Fbxo9         | 71538     | Mus musculus f-box protein 9 (Fbxo9), transcript variant 1, mRNA.                                                                                          |
| 2940075 | 0.020921338 | up | 1.1606919 | Akap10        | 56697     | Mus musculus A kinase (PRKA) anchor protein 10 (Akap10), nuclear gene encoding mitochondrial protein, mRNA.                                                |
| 6450047 | 0.04330814  | up | 1.1601726 | Tipin         | 66131     | Mus musculus timeless interacting protein (Tipin), mRNA.                                                                                                   |
| 130463  | 0.04330814  | up | 1.1597056 | Cacnb2        | 12296     | Mus musculus calcium channel, voltage-dependent, beta 2 subunit (Cacnb2), mRNA.                                                                            |
| 20296   | 0.020921338 | up | 1.1596204 | Lmf1          | 76483     | Mus musculus lipase maturation factor 1 (Lmf1), mRNA.                                                                                                      |
| 6980253 | 0.020921338 | up | 1.1595873 | Slc25a23      | 66972     | Mus musculus solute carrier family 25 (mitochondrial carrier; phosphate carrier), member 23 (Slc25a23), nuclear gene encoding mitochondrial protein, mRNA. |
| 7380735 | 0.04330814  | up | 1.1595287 | Cast          | 12380     | Mus musculus calpastatin (Cast), mRNA.                                                                                                                     |
| 3850064 | 0.04330814  | up | 1.159459  | Tmem106c      | 380967    | Mus musculus transmembrane protein 106C (Tmem106c), mRNA.                                                                                                  |
| 1240192 | 0.020921338 | up | 1.1592487 | Egln2         | 112406    | Mus musculus EGL nine homolog 2 (C. elegans) (Egln2), mRNA.                                                                                                |
| 4640040 | 0.04330814  | up | 1.1589787 | Comm2         | 52245     | Mus musculus COMM domain containing 2 (Comm2), mRNA.                                                                                                       |
| 730286  | 0.020921338 | up | 1.1589239 | Pomgnt1       | 68273     | Mus musculus protein O-linked mannose beta1,2-N-acetylglucosaminyltransferase (Pomgnt1), transcript variant 2, mRNA.                                       |
| 5220088 | 0.04330814  | up | 1.1585107 | Plekha5       | 109135    | Mus musculus pleckstrin homology domain containing, family A member 5 (Plekha5), mRNA.                                                                     |
| 5310209 | 0.020921338 | up | 1.1583192 | 2610021K21Rik | 78767     | Mus musculus RIKEN cDNA 2610021K21 gene (2610021K21Rik), mRNA.                                                                                             |
| 1940577 | 0.020921338 | up | 1.1583023 | Dap3          | 65111     | Mus musculus death associated protein 3 (Dap3), nuclear gene encoding mitochondrial protein, mRNA.                                                         |
| 6510333 | 0.020921338 | up | 1.1574428 | Sfrs1         | 110809    | Mus musculus splicing factor, arginine/serine-rich 1 (ASF/SF2) (Sfrs1), transcript variant 1, mRNA.                                                        |
| 4890524 | 0.020921338 | up | 1.1571227 | LOC100044129  | 100044129 | PREDICTED: Mus musculus similar to Ezh1 protein (LOC100044129), mRNA.                                                                                      |
| 1030204 | 0.04330814  | up | 1.1565684 | Mapt          | 17762     | Mus musculus microtubule-associated protein tau (Mapt), transcript variant 1, mRNA.                                                                        |
| 6450138 | 0.04330814  | up | 1.1565236 | Nrn1l         | 234700    | Mus musculus neuritin 1-like (Nrn1l), mRNA.                                                                                                                |
| 2030477 | 0.04330814  | up | 1.156121  | Taf6l         | 225895    | Mus musculus TAF6-like RNA polymerase II, p300/CBP-associated factor (PCAF)-associated factor (Taf6l), mRNA.                                               |
| 2060100 | 0.020921338 | up | 1.1551397 | Myst4         |           |                                                                                                                                                            |
| 2230376 | 0.020921338 | up | 1.1548895 | Cyp4f16       | 70101     | Mus musculus cytochrome P450, family 4, subfamily f, polypeptide 16 (Cyp4f16), mRNA.                                                                       |
| 4040541 | 0.020921338 | up | 1.1542485 | Ifnz          | 319146    | Mus musculus interferon zeta (Ifnz), mRNA.                                                                                                                 |
| 620121  | 0.020921338 | up | 1.1540744 | lft172        | 67661     | Mus musculus intraflagellar transport 172 homolog (Chlamydomonas) (lft172), mRNA.                                                                          |
| 2370575 | 0.020921338 | up | 1.1539224 | Rock2         | 19878     | Mus musculus Rho-associated coiled-coil containing protein kinase 2 (Rock2), mRNA.                                                                         |
| 6370343 | 0.04330814  | up | 1.153133  | Leng1         | 69757     | Mus musculus leukocyte receptor cluster (LRC) member 1 (Leng1), mRNA.                                                                                      |
| 10392   | 0.020921338 | up | 1.1527632 | Ankmy2        | 217473    | Mus musculus ankyrin repeat and MYND domain containing 2 (Ankmy2), transcript variant 1, mRNA.                                                             |
| 2030253 | 0.04330814  | up | 1.1527227 | Ints9         | 210925    | Mus musculus integrator complex subunit 9 (Ints9), mRNA.                                                                                                   |

|         |             |    |           |               |           |                                                                                                                                |
|---------|-------------|----|-----------|---------------|-----------|--------------------------------------------------------------------------------------------------------------------------------|
| 1440424 | 0.020921338 | up | 1.1523873 | Nanos1        | 332397    | Mus musculus nanos homolog 1 ( <i>Drosophila</i> ) ( <i>Nanos1</i> ), mRNA.                                                    |
| 3170192 | 0.04330814  | up | 1.1523849 | Vegfc         | 22341     | Mus musculus vascular endothelial growth factor C ( <i>Vegfc</i> ), mRNA.                                                      |
| 1190347 | 0.020921338 | up | 1.1523309 | Actn3         | 11474     | Mus musculus actinin alpha 3 ( <i>Actn3</i> ), mRNA.                                                                           |
| 3520524 | 0.020921338 | up | 1.1516848 | Xrcc3         | 74335     | Mus musculus X-ray repair complementing defective repair in Chinese hamster cells 3 ( <i>Xrcc3</i> ), mRNA.                    |
| 4570168 | 0.04330814  | up | 1.151213  | Armcx3        | 71703     | Mus musculus armadillo repeat containing, X-linked 3 ( <i>Armcx3</i> ), mRNA.                                                  |
| 430561  | 0.020921338 | up | 1.1511856 | Bcat1         | 12035     | Mus musculus branched chain aminotransferase 1, cytosolic ( <i>Bcat1</i> ), transcript variant 2, mRNA.                        |
| 5390064 | 0.020921338 | up | 1.1506878 | Lrmp          | 16970     | Mus musculus lymphoid-restricted membrane protein ( <i>Lrmp</i> ), mRNA.                                                       |
| 1990114 | 0.020921338 | up | 1.1505774 | Pcdhb20       | 93891     | Mus musculus protocadherin beta 20 ( <i>Pcdhb20</i> ), mRNA.                                                                   |
| 3830491 | 0.020921338 | up | 1.149941  | Tardbp        | 230908    | Mus musculus TAR DNA binding protein ( <i>Tardbp</i> ), transcript variant 5, mRNA.                                            |
| 2690475 | 0.04330814  | up | 1.1497216 | Rhobtb2       | 246710    | Mus musculus Rho-related BTB domain containing 2 ( <i>Rhobtb2</i> ), mRNA.                                                     |
| 2070474 | 0.020921338 | up | 1.1494195 | Itga5         | 16402     | Mus musculus integrin alpha 5 (fibronectin receptor alpha) ( <i>Itga5</i> ), mRNA.                                             |
| 6450450 | 0.04330814  | up | 1.1491393 | Gfra1         | 14585     | Mus musculus glial cell line derived neurotrophic factor family receptor alpha 1 ( <i>Gfra1</i> ), mRNA.                       |
| 3990079 | 0.04330814  | up | 1.14816   | Fbxw7         | 50754     | Mus musculus F-box and WD-40 domain protein 7 ( <i>Fbxw7</i> ), mRNA.                                                          |
| 3890136 | 0.020921338 | up | 1.1477863 | Ttc8          | 76260     | Mus musculus tetratricopeptide repeat domain 8 ( <i>Ttc8</i> ), transcript variant 1, mRNA.                                    |
| 360403  | 0.020921338 | up | 1.1473802 | Pgs1          | 74451     | Mus musculus phosphatidylglycerophosphate synthase 1 ( <i>Pgs1</i> ), mRNA.                                                    |
| 7380156 | 0.020921338 | up | 1.1471969 | Lad1          | 16763     | Mus musculus ladinin ( <i>Lad1</i> ), mRNA.                                                                                    |
| 6560722 | 0.020921338 | up | 1.1470482 | Qtrt1         | 60507     | Mus musculus queuine tRNA-ribosyltransferase 1 ( <i>Qtrt1</i> ), mRNA.                                                         |
| 3460379 | 0.020921338 | up | 1.1466426 | Arhgef2       | 16800     | Mus musculus rho/rac guanine nucleotide exchange factor (GEF) 2 ( <i>Arhgef2</i> ), mRNA.                                      |
| 3520193 | 0.04330814  | up | 1.146112  | Echdc3        | 67856     | Mus musculus enoyl Coenzyme A hydratase domain containing 3 ( <i>Echdc3</i> ), mRNA.                                           |
| 3710019 | 0.020921338 | up | 1.1454861 | Gpd1          | 14555     | Mus musculus glycerol-3-phosphate dehydrogenase 1 (soluble) ( <i>Gpd1</i> ), mRNA.                                             |
| 940435  | 0.020921338 | up | 1.145365  | Aip           | 11632     | Mus musculus aryl-hydrocarbon receptor-interacting protein ( <i>Aip</i> ), mRNA.                                               |
| 4780521 | 0.04330814  | up | 1.1450526 | Tirap         | 117149    | Mus musculus toll-interleukin 1 receptor (TIR) domain-containing adaptor protein ( <i>Tirap</i> ), mRNA.                       |
| 6550561 | 0.020921338 | up | 1.1446037 | Gemin5        | 216766    | Mus musculus gem (nuclear organelle) associated protein 5 ( <i>Gemin5</i> ), mRNA.                                             |
| 450204  | 0.04330814  | up | 1.1445036 | Gria2         |           |                                                                                                                                |
| 6770138 | 0.020921338 | up | 1.1443691 | Inadl         | 12695     | Mus musculus InaD-like ( <i>Drosophila</i> ) ( <i>Inadl</i> ), transcript variant 1, mRNA.                                     |
| 5420747 | 0.020921338 | up | 1.1442767 | Ltbp4         | 108075    | Mus musculus latent transforming growth factor beta binding protein 4 ( <i>Ltbp4</i> ), mRNA.                                  |
| 770471  | 0.04330814  | up | 1.1442299 | Zdhhc16       | 74168     | Mus musculus zinc finger, DHHC domain containing 16 ( <i>Zdhhc16</i> ), mRNA.                                                  |
| 270358  | 0.020921338 | up | 1.1438502 | Dmkn          | 73712     | Mus musculus dermokine ( <i>Dmkn</i> ), transcript variant 2, mRNA.                                                            |
| 1110255 | 0.020921338 | up | 1.1437778 | Rap2ip        | 51799     | Mus musculus Rap2 interacting protein ( <i>Rap2ip</i> ), mRNA.                                                                 |
| 3890192 | 0.04330814  | up | 1.1434577 | Luc7l         | 66978     | Mus musculus Luc7 homolog ( <i>S. cerevisiae</i> )-like ( <i>Luc7l</i> ), transcript variant 2, mRNA.                          |
| 70471   | 0.020921338 | up | 1.1428705 | Ephb4         | 13846     | Mus musculus Eph receptor B4 ( <i>Ephb4</i> ), mRNA.                                                                           |
| 6650463 | 0.04330814  | up | 1.1428542 | Grin2c        |           |                                                                                                                                |
| 1770168 | 0.04330814  | up | 1.1421896 | Kif4          | 16571     | Mus musculus kinesin family member 4 ( <i>Kif4</i> ), mRNA.                                                                    |
| 540112  | 0.020921338 | up | 1.1419985 | Hsf4          | 26386     | Mus musculus heat shock transcription factor 4 ( <i>Hsf4</i> ), mRNA.                                                          |
| 5080575 | 0.020921338 | up | 1.1413221 | Sct           | 20287     | Mus musculus secretin ( <i>Sct</i> ), mRNA.                                                                                    |
| 1980750 | 0.04330814  | up | 1.1410002 | Tmem184c      | 234463    | Mus musculus transmembrane protein 184C ( <i>Tmem184c</i> ), mRNA.                                                             |
| 130553  | 0.04330814  | up | 1.1409087 | Rcl1          | 59028     | Mus musculus RNA terminal phosphate cyclase-like 1 ( <i>Rcl1</i> ), mRNA.                                                      |
| 5720050 | 0.04330814  | up | 1.1407624 | Smyd2         | 226830    | Mus musculus SET and MYND domain containing 2 ( <i>Smyd2</i> ), mRNA.                                                          |
| 6480279 | 0.04330814  | up | 1.1406596 | Sel12         | 228684    | Mus musculus sel-1 suppressor of lin-12-like 2 ( <i>C. elegans</i> ) ( <i>Sel12</i> ), mRNA.                                   |
| 6110605 | 0.020921338 | up | 1.1403313 | Zfp553        | 233887    | Mus musculus zinc finger protein 553 ( <i>Zfp553</i> ), mRNA.                                                                  |
| 730739  | 0.04330814  | up | 1.1401224 | Cep78         | 208518    | Mus musculus centrosomal protein 78 ( <i>Cep78</i> ), mRNA.                                                                    |
| 2710674 | 0.04330814  | up | 1.1398612 | Zfp11         | 22648     | Mus musculus zinc finger protein 11 ( <i>Zfp11</i> ), mRNA.                                                                    |
| 7570070 | 0.04330814  | up | 1.1398504 | Wbscr22       | 66138     | Mus musculus Williams Beuren syndrome chromosome region 22 ( <i>Wbscr22</i> ), mRNA.                                           |
| 4880446 | 0.04330814  | up | 1.1392905 | Orc5l         | 26429     | Mus musculus origin recognition complex, subunit 5-like ( <i>S. cerevisiae</i> ) ( <i>Orc5l</i> ), mRNA.                       |
| 4220112 | 0.04330814  | up | 1.1391965 | Slc12a9       | 83704     | Mus musculus solute carrier family 12 (potassium/chloride transporters), member 9 ( <i>Slc12a9</i> ), mRNA.                    |
| 6110672 | 0.04330814  | up | 1.138681  | Phf15         | 76901     | Mus musculus PHD finger protein 15 ( <i>Phf15</i> ), mRNA.                                                                     |
| 7560482 | 0.020921338 | up | 1.1386682 | Senp6         |           |                                                                                                                                |
| 2100411 | 0.020921338 | up | 1.1385827 | Slc6a18       | 22598     | Mus musculus solute carrier family 6 (neurotransmitter transporter), member 18 ( <i>Slc6a18</i> ), transcript variant 1, mRNA. |
| 4780064 | 0.04330814  | up | 1.1384044 | LOC100045188  | 100045188 | PREDICTED: Mus musculus similar to ankyrin repeat domain 34 ( <i>LOC100045188</i> ), mRNA.                                     |
| 4540414 | 0.020164572 | up | 1.1372772 | Rps26         | 27370     | Mus musculus ribosomal protein S26 ( <i>Rps26</i> ), mRNA.                                                                     |
| 2900228 | 0.04330814  | up | 1.1372036 | O610009O20Rik | 66839     | Mus musculus RIKEN cDNA O610009O20 gene ( <i>O610009O20Rik</i> ), mRNA.                                                        |
| 6270195 | 0.020921338 | up | 1.1370564 | Zfp418        | 232854    | Mus musculus zinc finger protein 418 ( <i>Zfp418</i> ), mRNA.                                                                  |



|         |             |    |           |               |        |                                                                                                                                     |
|---------|-------------|----|-----------|---------------|--------|-------------------------------------------------------------------------------------------------------------------------------------|
| 430577  | 0.020921338 | up | 1.1364052 | Tle3          | 21887  | Mus musculus transducin-like enhancer of split 3, homolog of Drosophila E(spl) (Tle3), mRNA.                                        |
| 5870685 | 0.04330814  | up | 1.1358552 | Lrrc4         |        |                                                                                                                                     |
| 5910452 | 0.04330814  | up | 1.1349499 | Ctsf          | 56464  | Mus musculus cathepsin F (Ctsf), mRNA.                                                                                              |
| 670719  | 0.020921338 | up | 1.1348262 | Mfap3         | 216760 | Mus musculus microfibrillar-associated protein 3 (Mfap3), transcript variant 2, mRNA.                                               |
| 3780181 | 0.020921338 | up | 1.1343101 | Ttc7          | 225049 | Mus musculus tetratricopeptide repeat domain 7 (Ttc7), mRNA.                                                                        |
| 510373  | 0.020921338 | up | 1.1336818 | Snopc1        | 75627  | Mus musculus small nuclear RNA activating complex, polypeptide 1 (Snopc1), mRNA.                                                    |
| 6900050 | 0.020921338 | up | 1.133632  | Lmx1b         | 16917  | Mus musculus LIM homeobox transcription factor 1 beta (Lmx1b), mRNA.                                                                |
| 1300653 | 0.04330814  | up | 1.1330605 | Mtf1          | 17764  | Mus musculus metal response element binding transcription factor 1 (Mtf1), mRNA.                                                    |
| 1300465 | 0.04330814  | up | 1.1329845 | Nadsyn1       | 78914  | Mus musculus NAD synthetase 1 (Nadsyn1), mRNA.                                                                                      |
| 7560082 | 0.04330814  | up | 1.1329557 | Zdhhc18       | 503610 | Mus musculus zinc finger, DHHC domain containing 18 (Zdhhc18), mRNA.                                                                |
| 3840259 | 0.020921338 | up | 1.1328512 | Kctd12b       | 207474 | Mus musculus potassium channel tetramerisation domain containing 12b (Kctd12b), mRNA.                                               |
| 990632  | 0.020921338 | up | 1.1328288 | Fkrp          | 243853 | Mus musculus fukutin related protein (Fkrp), mRNA.                                                                                  |
| 5560739 | 0.020921338 | up | 1.1326482 | Cpsf3l        | 71957  | Mus musculus cleavage and polyadenylation specific factor 3-like (Cpsf3l), mRNA.                                                    |
| 6280278 | 0.04330814  | up | 1.1322031 | Ldlrad2       | 435811 | Mus musculus low density lipoprotein receptor A domain containing 2 (Ldlrad2), mRNA.                                                |
| 130092  | 0.020921338 | up | 1.1315024 | Nars2         | 244141 | Mus musculus asparaginyl-tRNA synthetase 2 (mitochondrial)(putative) (Nars2), mRNA.                                                 |
| 5960452 | 0.020921338 | up | 1.1314689 | Nde1          | 67203  | Mus musculus nuclear distribution gene E homolog 1 (A nidulans) (Nde1), mRNA.                                                       |
| 2710731 | 0.042066425 | up | 1.1311011 | Eif3f         | 66085  | Mus musculus eukaryotic translation initiation factor 3, subunit F (Eif3f), mRNA.                                                   |
| 2450129 | 0.020921338 | up | 1.1309432 | EG432982      | 432982 | Mus musculus predicted gene, EG432982 (EG432982), mRNA.                                                                             |
| 7210066 | 0.04330814  | up | 1.1302207 | Fbxl18        | 231863 | Mus musculus F-box and leucine-rich repeat protein 18 (Fbxl18), mRNA.                                                               |
| 1110047 | 0.04330814  | up | 1.1293607 | Fam171a1      | 269233 | Mus musculus family with sequence similarity 171, member A1 (Fam171a1), mRNA.                                                       |
| 940538  | 0.04330814  | up | 1.1292095 | Slc7a4        | 224022 | Mus musculus solute carrier family 7 (cationic amino acid transporter, y+ system), member 4 (Slc7a4), mRNA.                         |
| 2100497 | 0.04330814  | up | 1.128978  | LOC621823     | 621823 | PREDICTED: Mus musculus similar to Proteasome activator complex subunit 2 (Proteasome activator 28-beta subunit) (PA28beta) (PA28b) |
| 2510575 | 0.020921338 | up | 1.1287254 | B630005N14Rik | 101148 | Mus musculus RIKEN cDNA B630005N14 gene (B630005N14Rik), mRNA.                                                                      |
| 5090360 | 0.04330814  | up | 1.128137  | Lrrc59        | 98238  | Mus musculus leucine rich repeat containing 59 (Lrrc59), mRNA.                                                                      |
| 1690132 | 0.020921338 | up | 1.1281264 | Hmgb1         | 15289  | Mus musculus high mobility group box 1 (Hmgb1), mRNA.                                                                               |
| 7400181 | 0.04330814  | up | 1.1279169 | Phkb          | 102093 | Mus musculus phosphorylase kinase beta (Phkb), mRNA.                                                                                |
| 1500400 | 0.020921338 | up | 1.1262647 | O610010K06Rik | 71678  | Mus musculus RIKEN cDNA O610010K06 gene (O610010K06Rik), mRNA.                                                                      |
| 2680021 | 0.04330814  | up | 1.1257957 | Zfp606        | 67370  | Mus musculus zinc finger protein 606 (Zfp606), transcript variant 2, mRNA.                                                          |
| 1850326 | 0.020921338 | up | 1.1257176 | Mical1        | 171580 | Mus musculus microtubule associated monooxygenase, calponin and LIM domain containing 1 (Mical1), mRNA.                             |
| 3870639 | 0.020921338 | up | 1.124932  | Defcr6        | 13240  | Mus musculus defensin related cryptdin 6 (Defcr6), mRNA.                                                                            |
| 4860445 | 0.04330814  | up | 1.1248925 | Stard8        | 236920 | Mus musculus START domain containing 8 (Stard8), mRNA.                                                                              |
| 1510152 | 0.020921338 | up | 1.1248691 | 201001120Rik  | 67017  | Mus musculus RIKEN cDNA 201001120 gene (201001120Rik), mRNA.                                                                        |
| 4010133 | 0.020921338 | up | 1.124845  | Cdc42ep4      | 56699  | Mus musculus CDC42 effector protein (Rho GTPase binding) 4 (Cdc42ep4), mRNA.                                                        |
| 870301  | 0.04330814  | up | 1.1244073 | Lias          | 79464  | Mus musculus lipoic acid synthetase (Lias), nuclear gene encoding mitochondrial protein, mRNA.                                      |
| 290685  | 0.020164572 | up | 1.1243476 | Crel2         | 76737  | Mus musculus cysteine-rich with EGF-like domains 2 (Crel2), mRNA.                                                                   |
| 3180445 | 0.04330814  | up | 1.1231718 | Oas1b         | 23961  | Mus musculus 2'-5' oligoadenylate synthetase 1B (Oas1b), transcribed RNA.                                                           |
| 3360671 | 0.04330814  | up | 1.1230465 | Crls1         | 66586  | Mus musculus cardiolipin synthase 1 (Crls1), transcript variant 1, mRNA.                                                            |
| 6520215 | 0.04330814  | up | 1.1216393 | Kif4          | 16571  | Mus musculus kinesin family member 4 (Kif4), mRNA.                                                                                  |
| 3180754 | 0.04330814  | up | 1.12148   | Acdb4         | 67131  | Mus musculus acyl-Coenzyme A binding domain containing 4 (Acdb4), transcript variant 1, mRNA.                                       |
| 6370286 | 0.04330814  | up | 1.1208674 | Tdrd3         | 219249 | Mus musculus tudor domain containing 3 (Tdrd3), mRNA.                                                                               |
| 2100332 | 0.020921338 | up | 1.1208026 | Mto1          | 68291  | Mus musculus mitochondrial translation optimization 1 homolog (S. cerevisiae) (Mto1), mRNA.                                         |
| 5340301 | 0.04330814  | up | 1.1206989 | Rufy3         | 52822  | Mus musculus RUN and FYVE domain containing 3 (Rufy3), mRNA.                                                                        |
| 510564  | 0.02940105  | up | 1.1202683 | Krtcap2       | 66059  | Mus musculus keratinocyte associated protein 2 (Krtcap2), mRNA.                                                                     |
| 4760014 | 0.04330814  | up | 1.1202652 | Yif1a         | 68090  | Mus musculus Yip1 interacting factor homolog A (S. cerevisiae) (Yif1a), mRNA.                                                       |
| 4390414 | 0.020921338 | up | 1.1198605 | Kremen        |        |                                                                                                                                     |
| 2600475 | 0.020921338 | up | 1.1188681 | Tube1         | 71924  | Mus musculus epsilon-tubulin 1 (Tube1), mRNA.                                                                                       |
| 5960605 | 0.020921338 | up | 1.1180357 | Fut11         | 73068  | Mus musculus fucosyltransferase 11 (Fut11), mRNA.                                                                                   |
| 4260022 | 0.04330814  | up | 1.1180284 | Itfg3         | 106581 | Mus musculus integrin alpha FG-GAP repeat containing 3 (Itfg3), mRNA.                                                               |

|         |             |    |           |               |        |                                                                                                                |
|---------|-------------|----|-----------|---------------|--------|----------------------------------------------------------------------------------------------------------------|
| 4040592 | 0.04330814  | up | 1.1177825 | Polr3d        | 67065  | Mus musculus polymerase (RNA) III (DNA directed) polypeptide D (Polr3d), mRNA.                                 |
| 7380066 | 0.020921338 | up | 1.1175896 | Zfp595        | 218314 | Mus musculus zin finger protein 595 (Zfp595), mRNA.                                                            |
| 3840059 | 0.04330814  | up | 1.1173483 | Nfic          |        |                                                                                                                |
| 4570070 | 0.04330814  | up | 1.1150911 | Wif1          | 24117  | Mus musculus Wnt inhibitory factor 1 (Wif1), mRNA.                                                             |
| 650379  | 0.04330814  | up | 1.1150285 | 4732418C07Rik | 230648 | Mus musculus RIKEN cDNA 4732418C07 gene (4732418C07Rik), mRNA.                                                 |
| 6940431 | 0.04330814  | up | 1.1149672 | Pcyox1        |        |                                                                                                                |
| 1190519 | 0.04330814  | up | 1.1143591 | Prkag2        | 108099 | Mus musculus protein kinase, AMP-activated, gamma 2 non-catalytic subunit (Prkag2), mRNA.                      |
| 2480709 | 0.020921338 | up | 1.1143427 | Foxm1         |        |                                                                                                                |
| 1690544 | 0.04330814  | up | 1.1142213 | Ap1g2         | 11766  | Mus musculus adaptor protein complex AP-1, gamma 2 subunit (Ap1g2), mRNA.                                      |
| 1170730 | 0.04330814  | up | 1.1140472 | Ankle2        | 71782  | Mus musculus ankyrin repeat and LEM domain containing 2 (Ankle2), mRNA.                                        |
| 5670129 | 0.04330814  | up | 1.1137081 | Unc45a        | 101869 | Mus musculus unc-45 homolog A (C. elegans) (Unc45a), mRNA.                                                     |
| 4850647 | 0.020921338 | up | 1.1136982 | Cep110        | 26920  | PREDICTED: Mus musculus centrosomal protein 110 (Cep110), mRNA.                                                |
| 5490411 | 0.020921338 | up | 1.1133075 | Pi4k2b        | 67073  | Mus musculus phosphatidylinositol 4-kinase type 2 beta (Pi4k2b), transcript variant 2, mRNA.                   |
| 7050014 | 0.020921338 | up | 1.1131023 | Oasl2         | 23962  | Mus musculus 2'-5' oligoadenylate synthetase-like 2 (Oasl2), mRNA.                                             |
| 5390743 | 0.020921338 | up | 1.1128339 | Rps3a         | 20091  | Mus musculus ribosomal protein S3a (Rps3a), mRNA.                                                              |
| 6660079 | 0.04330814  | up | 1.1124634 | Slc25a38      | 208638 | Mus musculus solute carrier family 25, member 38 (Slc25a38), mRNA.                                             |
| 7150544 | 0.020921338 | up | 1.1123639 | Sirt6         | 50721  | Mus musculus sirtuin 6 (silent mating type information regulation 2, homolog) 6 (S. cerevisiae) (Sirt6), mRNA. |
| 7100129 | 0.04330814  | up | 1.112319  | Tubb5         | 22154  | Mus musculus tubulin, beta 5 (Tubb5), mRNA.                                                                    |
| 360379  | 0.04330814  | up | 1.1120222 | Arid1a        | 93760  | Mus musculus AT rich interactive domain 1A (SWI-like) (Arid1a), mRNA.                                          |
| 4120224 | 0.04330814  | up | 1.1119748 | Rps4x         | 20102  | Mus musculus ribosomal protein S4, X-linked (Rps4x), mRNA.                                                     |
| 3360202 | 0.04330814  | up | 1.111805  | Rps6kb1       | 72508  | Mus musculus ribosomal protein S6 kinase, polypeptide 1 (Rps6kb1), mRNA.                                       |
| 4280072 | 0.020921338 | up | 1.111193  | Arl6ip1       | 54208  | Mus musculus ADP-ribosylation factor-like 6 interacting protein 1 (Arl6ip1), mRNA.                             |
| 6370674 | 0.04330814  | up | 1.1111491 | Myst1         | 67773  | Mus musculus MYST histone acetyltransferase 1 (Myst1), mRNA.                                                   |
| 4490019 | 0.04330814  | up | 1.109686  | LOC235497     |        |                                                                                                                |
| 6330195 | 0.04330814  | up | 1.1091516 | Camk2n1       | 66259  | Mus musculus calcium/calmodulin-dependent protein kinase II inhibitor 1 (Camk2n1), mRNA.                       |
| 4070397 | 0.04330814  | up | 1.1083446 | Zfp187        | 432731 | Mus musculus zinc finger protein 187 (Zfp187), mRNA.                                                           |
| 360544  | 0.020921338 | up | 1.108144  | 0610012D14Rik | 68352  | Mus musculus RIKEN cDNA 0610012D14 gene (0610012D14Rik), mRNA.                                                 |
| 1260546 | 0.020921338 | up | 1.1078594 | Rpsud1        | 106707 | Mus musculus RNA pseudouridylation synthase domain containing 1 (Rpsud1), mRNA.                                |
| 6060088 | 0.04330814  | up | 1.1074625 | Wdr5          | 140858 | Mus musculus WD repeat domain 5 (Wdr5), mRNA.                                                                  |
| 6450133 | 0.04330814  | up | 1.1073802 | Ece1          | 230857 | Mus musculus endothelin converting enzyme 1 (Ece1), mRNA.                                                      |
| 840240  | 0.020921338 | up | 1.1073424 | Acsf3         | 257633 | Mus musculus acyl-CoA synthetase family member 3 (Acsf3), mRNA.                                                |
| 4900703 | 0.04330814  | up | 1.1066304 | Rpl19         | 19921  | Mus musculus ribosomal protein L19 (Rpl19), mRNA.                                                              |
| 5310521 | 0.04330814  | up | 1.1065977 | B3gnt3        | 72297  | Mus musculus UDP-GlcNAc:betaGal beta-1,3-N-acetylglucosaminyltransferase 3 (B3gnt3), mRNA.                     |
| 2690358 | 0.04330814  | up | 1.1050248 | Rprd1b        | 70470  | Mus musculus regulation of nuclear pre-mRNA domain containing 1B (Rprd1b), mRNA.                               |
| 4610546 | 0.04330814  | up | 1.1047037 | Cacnb1        |        |                                                                                                                |
| 620390  | 0.020921338 | up | 1.104593  | Tspan14       | 52588  | Mus musculus tetraspanin 14 (Tspan14), mRNA.                                                                   |
| 1740630 | 0.020921338 | up | 1.104403  | AB182283      | 192950 | Mus musculus cDNA sequence AB182283 (AB182283), mRNA.                                                          |
| 6130523 | 0.04330814  | up | 1.1038859 | Aldh3a2       | 11671  | Mus musculus aldehyde dehydrogenase family 3, subfamily A2 (Aldh3a2), mRNA.                                    |
| 1500193 | 0.04330814  | up | 1.1036689 | Mnt           | 17428  | Mus musculus max binding protein (Mnt), mRNA.                                                                  |
| 540427  | 0.04330814  | up | 1.1035529 | Tulp3         | 22158  | Mus musculus tubby-like protein 3 (Tulp3), mRNA.                                                               |
| 6840598 | 0.020921338 | up | 1.1032909 | Setd6         | 66083  | Mus musculus SET domain containing 6 (Setd6), mRNA.                                                            |
| 7650307 | 0.04330814  | up | 1.1024886 | Mre11a        | 17535  | Mus musculus meiotic recombination 11 homolog A (S. cerevisiae) (Mre11a), mRNA.                                |
| 110301  | 0.04330814  | up | 1.1012274 | Chst14        | 72136  | Mus musculus carbohydrate (N-acetylgalactosamine 4-O) sulfotransferase 14 (Chst14), mRNA.                      |
| 6330278 | 0.04330814  | up | 1.1008759 | Drg2          | 13495  | Mus musculus developmentally regulated GTP binding protein 2 (Drg2), mRNA.                                     |
| 6550551 | 0.04330814  | up | 1.1004359 | Cntln         | 338349 | Mus musculus centlein, centrosomal protein (Cntln), transcript variant 2, mRNA.                                |
| 3610440 | 0.020921338 | up | 1.098807  | Psap          | 19156  | Mus musculus prosaposin (Psap), mRNA.                                                                          |
| 4060504 | 0.020921338 | up | 1.0986971 | Rpl36a        | 19982  | Mus musculus ribosomal protein L36a (Rpl36a), mRNA.                                                            |
| 5270753 | 0.020921338 | up | 1.0985175 | 0610037D15Rik | 68394  | Mus musculus RIKEN cDNA 0610037D15 gene (0610037D15Rik), mRNA.                                                 |
| 2630240 | 0.04330814  | up | 1.0983332 | She           | 214547 | Mus musculus src homology 2 domain-containing transforming protein E (She), mRNA.                              |
| 5420438 | 0.020921338 | up | 1.0976695 | Fastk         | 66587  | Mus musculus Fas-activated serine/threonine kinase (Fastk), mRNA.<br>XM_982432 XM_982470 XM_982509             |
| 1990348 | 0.04330814  | up | 1.0973504 | 2600014M03Rik |        |                                                                                                                |
| 2900021 | 0.04330814  | up | 1.097338  | Morn2         | 378462 | Mus musculus MORN repeat containing 2 (Morn2), mRNA.                                                           |
| 3830338 | 0.020921338 | up | 1.0968682 | Tcp11l2       | 216198 | Mus musculus t-complex 11 (mouse) like 2 (Tcp11l2), mRNA.                                                      |
| 4010047 | 0.04330814  | up | 1.096206  | Creb3l2       | 208647 | Mus musculus cAMP responsive element binding protein 3-like 2 (Creb3l2), mRNA.                                 |
| 4880544 | 0.04330814  | up | 1.0942789 | Isg20l1       | 68048  | Mus musculus interferon stimulated exonuclease gene 20-like 1 (Isg20l1), mRNA.                                 |

|         |             |      |            |               |           |                                                                                                             |
|---------|-------------|------|------------|---------------|-----------|-------------------------------------------------------------------------------------------------------------|
| 130086  | 0.04330814  | up   | 1.0937412  | Tlr4          | 21898     | Mus musculus toll-like receptor 4 (Tlr4), mRNA.                                                             |
| 5810647 | 0.04330814  | up   | 1.0921803  | Lrrc1         | 214345    | Mus musculus leucine rich repeat containing 1 (Lrrc1), mRNA.                                                |
| 2030377 | 0.020921338 | up   | 1.0917326  | Mtmt14        | 97287     | Mus musculus myotubularin related protein 14 (Mtmt14), mRNA.                                                |
| 290433  | 0.020164572 | up   | 1.0911831  | LOC100048445  | 100048445 | PREDICTED: Mus musculus similar to fau (LOC100048445), mRNA.                                                |
| 1240068 | 0.04330814  | up   | 1.090265   | Fcf1          | 73736     | Mus musculus FCF1 small subunit (SSU) processome component homolog (S. cerevisiae) (Fcf1), mRNA.            |
| 4590079 | 0.04330814  | up   | 1.0869045  | Gm711         |           |                                                                                                             |
| 6040114 | 0.04330814  | up   | 1.0863163  | Man2a2        | 140481    | Mus musculus mannosidase 2, alpha 2 (Man2a2), mRNA.                                                         |
| 7000133 | 0.020921338 | up   | 1.085095   | Ap1g1         | 11765     | Mus musculus adaptor protein complex AP-1, gamma 1 subunit (Ap1g1), mRNA.                                   |
| 4920551 | 0.04330814  | up   | 1.0847623  | Zdhhc16       | 74168     | Mus musculus zinc finger, DHHC domain containing 16 (Zdhhc16), mRNA.                                        |
| 540128  | 0.04330814  | up   | 1.0843459  | Rufy1         | 216724    | Mus musculus RUN and FYVE domain containing 1 (Rufy1), mRNA.                                                |
| 5130022 | 0.04330814  | up   | 1.0830549  | Olf973        | 258606    | Mus musculus olfactory receptor 973 (Olf973), mRNA.                                                         |
| 6510309 | 0.020921338 | up   | 1.0810901  | Dnmt3b        | 13436     | Mus musculus DNA methyltransferase 3B (Dnmt3b), transcript variant 4, mRNA.                                 |
| 4120681 | 0.04330814  | up   | 1.0801982  | Srp68         | 217337    | Mus musculus signal recognition particle 68 (Srp68), mRNA.                                                  |
| 2650288 | 0.020921338 | up   | 1.0780848  | lft122        | 81896     | Mus musculus intraflagellar transport 122 homolog (Chlamydomonas) (lft122), mRNA.                           |
| 6180088 | 0.04330814  | up   | 1.0780243  | Psm6          | 66413     | Mus musculus proteasome (prosome, macropain) 26S subunit, non-ATPase, 6 (Psm6), mRNA.                       |
| 7550092 | 0.020921338 | up   | 1.0716524  | Zfp78         | 330463    | Mus musculus zinc finger protein 78 (Zfp78), transcript variant 1, mRNA.                                    |
| 7320575 | 0.04330814  | up   | 1.0697856  | Stard6        | 170461    | Mus musculus STAR-related lipid transfer (START) domain containing 6 (Stard6), mRNA.                        |
| 4640333 | 0.04330814  | up   | 1.0681053  | Tusc4         | 56032     | Mus musculus tumor suppressor candidate 4 (Tusc4), mRNA.                                                    |
| 4040047 | 0.04330814  | up   | 1.0671747  | Cysl2         | 70086     | Mus musculus cysteinyl leukotriene receptor 2 (Cysl2), mRNA.                                                |
| 4230132 | 0.020921338 | up   | 1.0661011  | D930036B08Rik |           |                                                                                                             |
| 6520619 | 0.02940105  | up   | 1.0627916  | LOC100047998  | 100047998 | PREDICTED: Mus musculus similar to ribosomal protein L37a (LOC100047998), mRNA.                             |
| 10753   | 0.04330814  | up   | 1.0600218  | Ehd3          | 57440     | Mus musculus EH-domain containing 3 (Ehd3), mRNA.                                                           |
| 4230093 | 0.020921338 | up   | 1.0592748  | lars          | 105148    | Mus musculus isoleucine-tRNA synthetase (lars), mRNA.                                                       |
| 2100142 | 0.019418657 | up   | 1.0536568  | Rpl35         | 66489     | Mus musculus ribosomal protein L35 (Rpl35), mRNA.                                                           |
| 6330564 | 0.04330814  | down | -1.0524882 | Cfh           | 12628     | Mus musculus complement component factor h (Cfh), mRNA.                                                     |
| 630114  | 0.020921338 | down | -1.057255  | Adra1a        | 11549     | Mus musculus adrenergic receptor, alpha 1a (Adra1a), mRNA.                                                  |
| 1410309 | 0.020921338 | down | -1.0658296 | Pkn2          | 109333    | Mus musculus protein kinase N2 (Pkn2), mRNA.                                                                |
| 4250609 | 0.04330814  | down | -1.0680918 | Megf9         | 230316    | Mus musculus multiple EGF-like-domains 9 (Megf9), mRNA.                                                     |
| 4070671 | 0.04330814  | down | -1.0708187 | Mterfd3       | 74238     | Mus musculus MTERF domain containing 3 (Mterfd3), mRNA.                                                     |
| 6350128 | 0.04330814  | down | -1.0727158 | Rps12         | 20042     | Mus musculus ribosomal protein S12 (Rps12), mRNA.                                                           |
| 6220451 | 0.04330814  | down | -1.0746565 | Xrn2          | 24128     | Mus musculus 5'-3' exoribonuclease 2 (Xrn2), mRNA.                                                          |
| 2510504 | 0.04330814  | down | -1.076274  | Tle4          | 21888     | Mus musculus transducin-like enhancer of split 4, homolog of Drosophila E(spl) (Tle4), mRNA.                |
| 3420543 | 0.04330814  | down | -1.077738  | Rpl6          | 19988     | Mus musculus ribosomal protein L6 (Rpl6), mRNA.                                                             |
| 1440017 | 0.04330814  | down | -1.0787102 | Jmjd4         | 194952    | Mus musculus jumonji domain containing 4 (Jmjd4), mRNA.                                                     |
| 3370167 | 0.020921338 | down | -1.0791829 | Snapp3        | 77634     | Mus musculus small nuclear RNA activating complex, polypeptide 3 (Snapp3), mRNA.                            |
| 2340112 | 0.04330814  | down | -1.0794853 | BC040758      | 268663    | Mus musculus cDNA sequence BC040758 (BC040758), mRNA.                                                       |
| 6270192 | 0.04330814  | down | -1.0810573 | Gm484         | 243967    | Mus musculus gene model 484, (NCBI) (Gm484), mRNA.                                                          |
| 5690066 | 0.04330814  | down | -1.0819837 | Lias          | 79464     | Mus musculus lipoic acid synthetase (Lias), nuclear gene encoding mitochondrial protein, mRNA.              |
| 450369  | 0.020921338 | down | -1.0820946 | 2610042L04Rik | 545015    | Mus musculus RIKEN cDNA 2610042L04 gene (2610042L04Rik), mRNA.                                              |
| 6180528 | 0.04330814  | down | -1.0821465 | Ctnna2        | 12386     | Mus musculus catenin (cadherin associated protein), alpha 2 (Ctnna2), transcript variant 2, mRNA.           |
| 6200669 | 0.04330814  | down | -1.082522  | Hoxd11        | 15431     | Mus musculus homeo box D11 (Hoxd11), mRNA.                                                                  |
| 5260408 | 0.020921338 | down | -1.0826257 | Mettl7b       | 71664     | Mus musculus methyltransferase like 7B (Mettl7b), mRNA.                                                     |
| 6840180 | 0.04330814  | down | -1.0833154 | S100a10       | 20194     | Mus musculus S100 calcium binding protein A10 (calpactin) (S100a10), mRNA.                                  |
| 5670243 | 0.04330814  | down | -1.0845221 | Rnaseh1       | 19819     | Mus musculus ribonuclease H1 (Rnaseh1), mRNA.                                                               |
| 6590086 | 0.020921338 | down | -1.0856324 | Txn12         | 30926     | Mus musculus thioredoxin-like 2 (Txn12), mRNA.                                                              |
| 6450020 | 0.04330814  | down | -1.0856658 | Dmn           | 233335    | Mus musculus desmuslin (Dmn), transcript variant 1, mRNA.                                                   |
| 360142  | 0.020921338 | down | -1.0868522 | Zbtb32        | 58206     | Mus musculus zinc finger and BTB domain containing 32 (Zbtb32), mRNA.                                       |
| 6550470 | 0.020921338 | down | -1.087154  | Arhgap24      | 231532    | Mus musculus Rho GTPase activating protein 24 (Arhgap24), transcript variant 1, mRNA.                       |
| 3310736 | 0.04330814  | down | -1.0877839 | Zfp385c       | 278304    | Mus musculus zinc finger protein 385C (Zfp385c), mRNA.                                                      |
| 5870300 | 0.04330814  | down | -1.0882006 | Jarid1b       | 75605     | Mus musculus jumonji, AT rich interactive domain 1B (Rbp2 like) (Jarid1b), mRNA.                            |
| 510746  | 0.04330814  | down | -1.088621  | Stam          | 20844     | Mus musculus signal transducing adaptor molecule (SH3 domain and ITAM motif) 1 (Stam), mRNA.                |
| 6280224 | 0.020921338 | down | -1.089655  | Ccdc11        | 74453     | Mus musculus coiled-coil domain containing 11 (Ccdc11), mRNA. XM_924500                                     |
| 1190673 | 0.020921338 | down | -1.0903374 | Hspa9         | 15526     | Mus musculus heat shock protein 9 (Hspa9), mRNA.                                                            |
| 1400187 | 0.04330814  | down | -1.0917562 | Glt8d1        | 76485     | Mus musculus glycosyltransferase 8 domain containing 1 (Glt8d1), mRNA.                                      |
| 6590575 | 0.04330814  | down | -1.0946536 | Aass          | 30956     | Mus musculus amino adipate-semialdehyde synthase (Aass), nuclear gene encoding mitochondrial protein, mRNA. |

|         |             |      |            |               |           |                                                                                             |
|---------|-------------|------|------------|---------------|-----------|---------------------------------------------------------------------------------------------|
| 2120465 | 0.04330814  | down | -1.0950326 | Efcab9        | 69306     | Mus musculus EF-hand calcium binding domain 9 (Efcab9), mRNA.                               |
| 4590458 | 0.04330814  | down | -1.0952363 | Clecsf9       |           |                                                                                             |
| 4830750 | 0.020921338 | down | -1.0956321 | Txn1          | 22166     | Mus musculus thioredoxin 1 (Txn1), mRNA.                                                    |
| 6280243 | 0.020921338 | down | -1.0956404 | lppk          | 75678     | Mus musculus inositol 1,3,4,5,6-pentakisphosphate 2-kinase (lppk), mRNA.                    |
| 2690008 | 0.020921338 | down | -1.0959672 | Fpgs          | 14287     | Mus musculus folylpolyglutamyl synthetase (Fpgs), mRNA.                                     |
| 2190278 | 0.020921338 | down | -1.0967125 | Scoc          | 56367     | Mus musculus short coiled-coil protein (Scoc), transcript variant 1, mRNA.                  |
| 4040053 | 0.020921338 | down | -1.0972207 | Rab11fip2     | 74998     | Mus musculus RAB11 family interacting protein 2 (class I) (Rab11fip2), mRNA.                |
| 2900110 | 0.04330814  | down | -1.0975543 | 1300018J18Rik | 223776    | Mus musculus RIKEN cDNA 1300018J18 gene (1300018J18Rik), mRNA.                              |
| 5560326 | 0.04330814  | down | -1.0980487 | Ccdc43        | 52715     | Mus musculus coiled-coil domain containing 43 (Ccdc43), mRNA.                               |
| 6220615 | 0.020921338 | down | -1.0983335 | 1500041J02Rik |           |                                                                                             |
| 1110100 | 0.04330814  | down | -1.1010214 | Dpy19l3       | 233115    | Mus musculus dpy-19-like 3 (C. elegans) (Dpy19l3), mRNA.                                    |
| 4060142 | 0.04330814  | down | -1.1011094 | Reep6         | 70335     | Mus musculus rekeron accessory protein 6 (Reep6), mRNA.                                     |
| 3170221 | 0.04330814  | down | -1.1013696 | 3830406C13Rik | 218734    | Mus musculus RIKEN cDNA 3830406C13 gene (3830406C13Rik), transcript variant 2, mRNA.        |
| 6480292 | 0.04330814  | down | -1.10174   | Cenpq         | 83815     | Mus musculus centromere protein Q (Cenpq), mRNA.                                            |
| 830278  | 0.020921338 | down | -1.1019529 | Ppp1r12c      | 232807    | Mus musculus protein phosphatase 1, regulatory (inhibitor) subunit 12C (Ppp1r12c), mRNA.    |
| 5270138 | 0.04330814  | down | -1.1032913 | Herc4         | 67345     | Mus musculus hect domain and RLD 4 (Herc4), mRNA.                                           |
| 4860224 | 0.04330814  | down | -1.1045728 | Sod2          |           |                                                                                             |
| 4290369 | 0.04330814  | down | -1.1047968 | Cdgap         | 12549     | Mus musculus CDC42 GTPase-activating protein (Cdgap), mRNA.                                 |
| 5670075 | 0.020921338 | down | -1.1049176 | BC013529      | 215751    | Mus musculus cDNA sequence BC013529 (BC013529), mRNA.                                       |
| 6590347 | 0.020921338 | down | -1.1049236 | Mapk9         | 26420     | Mus musculus mitogen-activated protein kinase 9 (Mapk9), transcript variant 2, mRNA.        |
| 6040468 | 0.04330814  | down | -1.1056266 | Scyl2         | 213326    | Mus musculus SCY1-like 2 (S. cerevisiae) (Scyl2), mRNA.                                     |
| 5700768 | 0.04330814  | down | -1.1056311 | Kat5          | 81601     | Mus musculus K(lysine) acetyltransferase 5 (Kat5), mRNA.                                    |
| 5820553 | 0.04330814  | down | -1.1056371 | Arl1          | 104303    | Mus musculus ADP-ribosylation factor-like 1 (Arl1), mRNA.                                   |
| 3310471 | 0.020921338 | down | -1.1058149 | Bcl2l14       | 66813     | Mus musculus BCL2-like 14 (apoptosis facilitator) (Bcl2l14), mRNA.                          |
| 3460441 | 0.04330814  | down | -1.1073117 | Olf1r1113     | 404327    | Mus musculus olfactory receptor 1113 (Olf1r1113), mRNA.                                     |
| 3520020 | 0.04330814  | down | -1.1074808 | LOC100046608  | 100046608 | PREDICTED: Mus musculus similar to Bcl2-like protein (LOC100046608), mRNA.                  |
| 4540075 | 0.020921338 | down | -1.1078175 | D5Wsu178e     | 28042     | Mus musculus DNA segment, Chr 5, Wayne State University 178, expressed (D5Wsu178e), mRNA.   |
| 240438  | 0.020921338 | down | -1.10793   | Krt8          | 16691     | Mus musculus keratin 8 (Krt8), mRNA.                                                        |
| 1260341 | 0.04330814  | down | -1.1083964 | Wdr45l        | 66840     | Mus musculus Wdr45 like (Wdr45l), mRNA.                                                     |
| 2600324 | 0.020921338 | down | -1.108552  | LOC100047368  | 100047368 | PREDICTED: Mus musculus similar to coiled-coil domain containing 63 (LOC100047368), mRNA.   |
| 1820414 | 0.04330814  | down | -1.1089895 | Tpd52         | 21985     | Mus musculus tumor protein D52 (Tpd52), transcript variant 3, mRNA.                         |
| 4810279 | 0.04330814  | down | -1.109305  | Rnf215        | 71673     | Mus musculus ring finger protein 215 (Rnf215), mRNA.                                        |
| 7200601 | 0.04330814  | down | -1.1101019 | Relt          | 320100    | Mus musculus RELT tumor necrosis factor receptor (Relt), mRNA.                              |
| 7200240 | 0.04330814  | down | -1.1108555 | Sap30         | 60406     | Mus musculus sin3 associated polypeptide (Sap30), mRNA.                                     |
| 2690437 | 0.020921338 | down | -1.1113259 | Fbxl12        | 30843     | Mus musculus F-box and leucine-rich repeat protein 12 (Fbxl12), transcript variant 1, mRNA. |
| 6520113 | 0.04330814  | down | -1.1113353 | Snx14         | 244962    | Mus musculus sorting nexin 14 (Snx14), mRNA.                                                |
| 3520113 | 0.04330814  | down | -1.1113912 | Rrm2b         | 382985    | Mus musculus ribonucleotide reductase M2 B (TP53 inducible) (Rrm2b), mRNA.                  |
| 1500670 | 0.020921338 | down | -1.1116667 | 1700037C18Rik | 73261     | Mus musculus RIKEN cDNA 1700037C18 gene (1700037C18Rik), mRNA.                              |
| 5720356 | 0.04330814  | down | -1.112205  | Trfr2         | 50765     | Mus musculus transferrin receptor 2 (Trfr2), mRNA.                                          |
| 6900170 | 0.020921338 | down | -1.1123009 | Fbxl10        | 30841     | Mus musculus F-box and leucine-rich repeat protein 10 (Fbxl10), transcript variant 1, mRNA. |
| 4880475 | 0.020921338 | down | -1.1124686 | Tdp1          | 104884    | Mus musculus tyrosyl-DNA phosphodiesterase 1 (Tdp1), mRNA.                                  |
| 4290377 | 0.04330814  | down | -1.1124879 | Efcab2        | 68226     | Mus musculus EF-hand calcium binding domain 2 (Efcab2), mRNA.                               |
| 6380022 | 0.020921338 | down | -1.1127739 | 2310033E01Rik | 641361    | Mus musculus RIKEN cDNA 2310033E01 gene (2310033E01Rik), mRNA.                              |
| 20707   | 0.020921338 | down | -1.1132824 | H2-M10.1      | 14985     | Mus musculus histocompatibility 2, M region locus 10.1 (H2-M10.1), mRNA.                    |
| 4150739 | 0.04330814  | down | -1.1136777 | Cdc42ep3      | 260409    | Mus musculus CDC42 effector protein (Rho GTPase binding) 3 (Cdc42ep3), mRNA.                |
| 6200537 | 0.020921338 | down | -1.1138191 | Klhdc1        | 271005    | Mus musculus kelch domain containing 1 (Klhdc1), mRNA.                                      |
| 1440647 | 0.020921338 | down | -1.1141009 | Cnr1          | 12801     | Mus musculus cannabinoid receptor 1 (brain) (Cnr1), mRNA.                                   |
| 2810544 | 0.04330814  | down | -1.11445   | Spna1         | 20739     | Mus musculus spectrin alpha 1 (Spna1), mRNA.                                                |
| 3170259 | 0.04330814  | down | -1.1146057 | Lrrc40        | 67144     | Mus musculus leucine rich repeat containing 40 (Lrrc40), mRNA.                              |
| 1050097 | 0.04330814  | down | -1.1147319 | Ran           | 19384     | Mus musculus RAN, member RAS oncogene family (Ran), mRNA.                                   |
| 7150608 | 0.020921338 | down | -1.1157781 | Atad1         | 67979     | Mus musculus ATPase family, AAA domain containing 1 (Atad1), mRNA.                          |
| 2000292 | 0.04330814  | down | -1.1158363 | Ptpn12        | 19248     | Mus musculus protein tyrosine phosphatase, non-receptor type 12 (Ptpn12), mRNA.             |
| 2070427 | 0.020921338 | down | -1.1160375 | Cdc42bbp      | 217866    | Mus musculus CDC42 binding protein kinase beta (Cdc42bbp), mRNA.                            |
| 7510707 | 0.020921338 | down | -1.1163887 | Zfp617        |           |                                                                                             |
| 3710647 | 0.04330814  | down | -1.1164161 | Pdzk1ip1      | 67182     | Mus musculus PDZK1 interacting protein 1 (Pdzk1ip1), mRNA.                                  |
| 3890609 | 0.020921338 | down | -1.1167632 | Lpin1         | 14245     | Mus musculus lipin 1 (Lpin1), transcript variant 1, mRNA.                                   |
| 3370736 | 0.04330814  | down | -1.1177993 | 2900092C05Rik | 73090     | Mus musculus RIKEN cDNA 2900092C05 gene (2900092C05Rik), mRNA.                              |
| 2710047 | 0.04330814  | down | -1.1184235 | Jmjd2a        | 230674    | Mus musculus jumonji domain containing 2A (Jmjd2a), mRNA.                                   |
| 6900017 | 0.020921338 | down | -1.1185892 | Bzw1          |           |                                                                                             |
| 6270112 | 0.04330814  | down | -1.1194566 | Frrs1         | 20321     | Mus musculus ferric-chelate reductase 1 (Frrs1), mRNA.                                      |

|         |             |      |            |               |        |                                                                                                                        |
|---------|-------------|------|------------|---------------|--------|------------------------------------------------------------------------------------------------------------------------|
| 7330767 | 0.020921338 | down | -1.1194652 | Prrx1         | 18933  | Mus musculus paired related homeobox 1 (Prrx1), transcript variant 2, mRNA.                                            |
| 4290176 | 0.04330814  | down | -1.1201408 | Neu4          | 241159 | Mus musculus sialidase 4 (Neu4), mRNA.                                                                                 |
| 4070681 | 0.020921338 | down | -1.1202519 | Ahrr          | 11624  | Mus musculus aryl-hydrocarbon receptor repressor (Ahrr), mRNA.                                                         |
| 4290035 | 0.04330814  | down | -1.1216195 | Trem3         | 58218  | Mus musculus triggering receptor expressed on myeloid cells 3 (Trem3), mRNA.                                           |
| 3800327 | 0.020921338 | down | -1.1218091 | Rps6kl1       | 238323 | Mus musculus ribosomal protein S6 kinase-like 1 (Rps6kl1), mRNA.                                                       |
| 50709   | 0.020921338 | down | -1.1222175 | Kcne1         | 16509  | Mus musculus potassium voltage-gated channel, Isk-related subfamily, member 1 (Kcne1), mRNA.                           |
| 3520220 | 0.020921338 | down | -1.1222787 | Gcnt1         | 14537  | Mus musculus glucosaminyl (N-acetyl) transferase 1, core 2 (Gcnt1), mRNA.                                              |
| 5720382 | 0.04330814  | down | -1.1226277 | Kcnq2         | 16536  | Mus musculus potassium voltage-gated channel, subfamily Q, member 2 (Kcnq2), transcript variant 9, mRNA.               |
| 6020288 | 0.04330814  | down | -1.1232108 | Fbxo9         | 71538  | Mus musculus f-box protein 9 (Fbxo9), transcript variant 1, mRNA.                                                      |
| 7210091 | 0.020921338 | down | -1.1232594 | Stoml1        | 69106  | Mus musculus stomatin-like 1 (Stoml1), mRNA.                                                                           |
| 3440592 | 0.04330814  | down | -1.1236321 | Sirt5         | 68346  | Mus musculus sirtuin 5 (silent mating type information regulation 2 homolog) 5 ( <i>S. cerevisiae</i> ) (Sirt5), mRNA. |
| 5290561 | 0.02940105  | down | -1.1239572 | Prr13         | 66151  | Mus musculus proline rich 13 (Prr13), mRNA.                                                                            |
| 5670615 | 0.04330814  | down | -1.1242588 | Tardbp        | 230908 | Mus musculus TAR DNA binding protein (Tardbp), transcript variant 1, mRNA.                                             |
| 20180   | 0.04330814  | down | -1.1245362 | Mtrf1         | 211253 | Mus musculus mitochondrial translational release factor 1 (Mtrf1), nuclear gene encoding mitochondrial protein, mRNA.  |
| 6560279 | 0.04330814  | down | -1.1247199 | Vps37a        | 52348  | Mus musculus vacuolar protein sorting 37A (yeast) (Vps37a), mRNA.                                                      |
| 6100392 | 0.020921338 | down | -1.1253266 | Tmem53        | 68777  | Mus musculus transmembrane protein 53 (Tmem53), mRNA.                                                                  |
| 4860204 | 0.020921338 | down | -1.1253697 | Olf1331       | 258159 | Mus musculus olfactory receptor 1331 (Olf1331), mRNA.                                                                  |
| 3170292 | 0.020921338 | down | -1.1256908 | Rap1b         | 215449 | Mus musculus RAS related protein 1b (Rap1b), mRNA.                                                                     |
| 6040364 | 0.020921338 | down | -1.1258197 | Hbegf         | 15200  | Mus musculus heparin-binding EGF-like growth factor (Hbegf), mRNA.                                                     |
| 270450  | 0.04330814  | down | -1.1258789 | 2010106G01Rik | 66552  | Mus musculus RIKEN cDNA 2010106G01 gene (2010106G01Rik), mRNA.                                                         |
| 4480326 | 0.04330814  | down | -1.1259098 | Urod          | 22275  | Mus musculus uroporphyrinogen decarboxylase (Urod), mRNA.                                                              |
| 4290465 | 0.04330814  | down | -1.1262966 | Selp          | 20344  | Mus musculus selectin, platelet (Selp), mRNA.                                                                          |
| 5050575 | 0.04330814  | down | -1.1263554 | Tfb2m         | 15278  | Mus musculus transcription factor B2, mitochondrial (Tfb2m), mRNA.                                                     |
| 3870040 | 0.020921338 | down | -1.1268169 | Homer1        | 26556  | Mus musculus homer homolog 1 ( <i>Drosophila</i> ) (Homer1), transcript variant d, mRNA.                               |
| 4780370 | 0.04330814  | down | -1.1271757 | BC027231      | 212547 | Mus musculus cDNA sequence BC027231 (BC027231), mRNA.                                                                  |
| 2230452 | 0.04330814  | down | -1.1273758 | 1810074P20Rik | 67490  | Mus musculus RIKEN cDNA 1810074P20 gene (1810074P20Rik), mRNA.                                                         |
| 6840209 | 0.04330814  | down | -1.127419  | Lamb2         | 16779  | Mus musculus laminin, beta 2 (Lamb2), mRNA.                                                                            |
| 7150369 | 0.020921338 | down | -1.1276037 | Arl2bp        | 107566 | Mus musculus ADP-ribosylation factor-like 2 binding protein (Arl2bp), transcript variant 2, mRNA.                      |
| 2030041 | 0.020921338 | down | -1.1277616 | Ranbp6        | 240614 | Mus musculus RAN binding protein 6 (Ranbp6), mRNA.                                                                     |
| 1010341 | 0.04330814  | down | -1.1279434 | Ankrd25       | 235041 | Mus musculus ankyrin repeat domain 25 (Ankrd25), mRNA.                                                                 |
| 6620181 | 0.020921338 | down | -1.1279441 | Kcnp2         | 80906  | Mus musculus Kv channel-interacting protein 2 (Kcnp2), transcript variant c, mRNA.                                     |
| 4010673 | 0.04330814  | down | -1.1283643 | Nqo1          | 18104  | Mus musculus NAD(P)H dehydrogenase, quinone 1 (Nqo1), mRNA.                                                            |
| 1660088 | 0.04330814  | down | -1.1284428 | Tmem169       | 271711 | Mus musculus transmembrane protein 169 (Tmem169), mRNA.                                                                |
| 1780332 | 0.020921338 | down | -1.1286798 | Adck1         | 72113  | Mus musculus aarF domain containing kinase 1 (Adck1), mRNA.                                                            |
| 4250577 | 0.020921338 | down | -1.1287616 | Helb          | 117599 | Mus musculus helicase (DNA) B (Helb), mRNA.                                                                            |
| 5090315 | 0.020921338 | down | -1.1288012 | Rwdd3         | 73170  | Mus musculus RWD domain containing 3 (Rwdd3), mRNA.                                                                    |
| 380070  | 0.020921338 | down | -1.1291807 | 4933417E01Rik | 74463  | PREDICTED: Mus musculus RIKEN cDNA 4933417E01 gene (4933417E01Rik), mRNA.                                              |
| 5310672 | 0.020921338 | down | -1.1295232 | Fxyd5         | 18301  | Mus musculus FXD domain-containing ion transport regulator 5 (Fxyd5), mRNA.                                            |
| 4390273 | 0.04330814  | down | -1.1299938 | Bcl2l12       | 75736  | Mus musculus BCL2-like 12 (proline rich) (Bcl2l12), mRNA.                                                              |
| 5080259 | 0.020921338 | down | -1.1301525 | Zranb2        | 53861  | Mus musculus zinc finger, RAN-binding domain containing 2 (Zranb2), mRNA.                                              |
| 4180411 | 0.04330814  | down | -1.1301538 | lft140        | 106633 | Mus musculus intraflagellar transport 140 homolog ( <i>Chlamydomonas</i> ) (lft140), mRNA.                             |
| 5290215 | 0.04330814  | down | -1.1306386 | Ikzf5         | 67143  | Mus musculus IKAROS family zinc finger 5 (Ikzf5), mRNA.                                                                |
| 4860735 | 0.020921338 | down | -1.1307269 | D10Wsu102e    | 28109  | Mus musculus DNA segment, Chr 10, Wayne State University 102, expressed (D10Wsu102e), mRNA.                            |
| 1570070 | 0.020921338 | down | -1.1310105 | Lsm6          | 78651  | Mus musculus LSM6 homolog, U6 small nuclear RNA associated ( <i>S. cerevisiae</i> ) (Lsm6), mRNA. XM_990335            |
| 2600377 | 0.020921338 | down | -1.1316888 | Ebi2          |        |                                                                                                                        |
| 5390193 | 0.04330814  | down | -1.1317941 | Cd59b         | 333883 | Mus musculus CD59b antigen (Cd59b), mRNA.                                                                              |
| 4150463 | 0.04330814  | down | -1.132153  | Mrpl33        | 66845  | Mus musculus mitochondrial ribosomal protein L33 (Mrpl33), nuclear gene encoding mitochondrial protein, mRNA.          |
| 4730538 | 0.020921338 | down | -1.1326708 | Rpp21         | 67676  | Mus musculus ribonuclease P 21 subunit (human) (Rpp21), mRNA.                                                          |
| 4280022 | 0.020921338 | down | -1.1327924 | Ccbl2         | 229905 | Mus musculus cysteine conjugate-beta lyase 2 (Ccbl2), mRNA.                                                            |
| 460327  | 0.020921338 | down | -1.1339364 | Slc2a3        | 20527  | Mus musculus solute carrier family 2 (facilitated glucose transporter), member 3 (Slc2a3), mRNA.                       |
| 4230722 | 0.04330814  | down | -1.1345223 | Nup50         | 18141  | Mus musculus nucleoporin 50 (Nup50), mRNA.                                                                             |
| 1580161 | 0.04330814  | down | -1.1347843 | Dnajc10       | 66861  | Mus musculus DnaJ (Hsp40) homolog, subfamily C, member 10 (Dnajc10), mRNA.                                             |
| 50376   | 0.04330814  | down | -1.1350461 | Mcph1         | 244329 | Mus musculus microcephaly, primary autosomal recessive 1 (Mcph1), mRNA.                                                |
| 4590100 | 0.04330814  | down | -1.1355238 | Trim40        | 195359 | Mus musculus tripartite motif-containing 40 (Trim40), mRNA.                                                            |
| 7330497 | 0.020921338 | down | -1.1361309 | Srp19         | 66384  | Mus musculus signal recognition particle 19 (Srp19), mRNA.                                                             |

|         |             |      |            |               |           |                                                                                                                                                               |
|---------|-------------|------|------------|---------------|-----------|---------------------------------------------------------------------------------------------------------------------------------------------------------------|
| 1510612 | 0.020921338 | down | -1.136148  | Oas1c         | 114643    | Mus musculus 2'-5' oligoadenylate synthetase 1C (Oas1c), mRNA.                                                                                                |
| 1240300 | 0.04330814  | down | -1.1362449 | Map2k6        | 26399     | Mus musculus mitogen-activated protein kinase kinase 6 (Map2k6), mRNA.                                                                                        |
| 20768   | 0.04330814  | down | -1.1365384 | Ati3          | 109168    | Mus musculus atlastin GTPase 3 (Ati3), mRNA.                                                                                                                  |
| 7040431 | 0.04330814  | down | -1.1366647 | Olf1r168      | 258354    | Mus musculus olfactory receptor 168 (Olf1r168), mRNA.                                                                                                         |
| 6650767 | 0.020921338 | down | -1.1367708 | Tiparp        | 99929     | Mus musculus TCDD-inducible poly(ADP-ribose) polymerase (Tiparp), mRNA.                                                                                       |
| 7200333 | 0.04330814  | down | -1.1368991 | Gusb          | 110006    | Mus musculus glucuronidase, beta (Gusb), mRNA.                                                                                                                |
| 5260561 | 0.020921338 | down | -1.1369283 | Dnajc30       | 66114     | Mus musculus DnaJ (Hsp40) homolog, subfamily C, member 30 (Dnajc30), mRNA.                                                                                    |
| 7400471 | 0.04330814  | down | -1.1371547 | Pla2g4e       | 329502    | Mus musculus phospholipase A2, group IVE (Pla2g4e), mRNA.                                                                                                     |
| 5090440 | 0.020921338 | down | -1.1374521 | Prdx6         | 11758     | Mus musculus peroxiredoxin 6 (Prdx6), mRNA.                                                                                                                   |
| 6480114 | 0.04330814  | down | -1.1374567 | Cnot2         | 72068     | Mus musculus CCR4-NOT transcription complex, subunit 2 (Cnot2), transcript variant 4, mRNA.                                                                   |
| 5090241 | 0.04330814  | down | -1.1374958 | Shmt2         | 108037    | Mus musculus serine hydroxymethyltransferase 2 (mitochondrial) (Shmt2), nuclear gene encoding mitochondrial protein, mRNA.                                    |
| 1410142 | 0.04330814  | down | -1.1378258 | BC038156      | 270135    | Mus musculus cDNA sequence BC038156 (BC038156), mRNA.                                                                                                         |
| 650458  | 0.04330814  | down | -1.1379778 | Pvr           | 52118     | Mus musculus poliovirus receptor (Pvr), mRNA.                                                                                                                 |
| 2230161 | 0.04330814  | down | -1.1390196 | Comm1d1       | 17846     | Mus musculus COMM domain containing 1 (Comm1d1), mRNA.                                                                                                        |
| 730373  | 0.020921338 | down | -1.1390759 | Cnksr2        | 245684    | Mus musculus connector enhancer of kinase suppressor of Ras 2 (Cnksr2), mRNA.                                                                                 |
| 3940026 | 0.020921338 | down | -1.1390942 | Cln4-2        |           |                                                                                                                                                               |
| 1940400 | 0.04330814  | down | -1.1391779 | Ddx59         | 67997     | Mus musculus DEAD (Asp-Glu-Ala-Asp) box polypeptide 59 (Ddx59), transcript variant 2, mRNA.                                                                   |
| 5340121 | 0.020921338 | down | -1.1393056 | LOC100048622  | 100048622 | PREDICTED: Mus musculus similar to EF-hand Ca <sup>2+</sup> binding protein p22 (LOC100048622), mRNA.                                                         |
| 6020187 | 0.020921338 | down | -1.1395459 | Piwil2        | 57746     | Mus musculus piwi-like homolog 2 (Drosophila) (Piwil2), mRNA.                                                                                                 |
| 5260019 | 0.04330814  | down | -1.140226  | Sel1l         | 20338     | Mus musculus sel-1 suppressor of lin-12-like (C. elegans) (Sel1l), transcript variant 1, mRNA.                                                                |
| 2140639 | 0.020921338 | down | -1.1403325 | Ctse          | 13034     | Mus musculus cathepsin E (Ctse), mRNA.                                                                                                                        |
| 4590538 | 0.04330814  | down | -1.1404699 | Uty           | 22290     | Mus musculus ubiquitously transcribed tetratricopeptide repeat gene, Y chromosome (Uty), mRNA.                                                                |
| 1780681 | 0.04330814  | down | -1.1405537 | Azi2          | 27215     | Mus musculus 5-azacytidine induced gene 2 (Azi2), transcript variant 2, mRNA.                                                                                 |
| 5560537 | 0.04330814  | down | -1.1407771 | Sfrs11        | 69207     | Mus musculus splicing factor, arginine/serine-rich 11 (Sfrs11), transcript variant 3, mRNA.                                                                   |
| 4210762 | 0.04330814  | down | -1.1413541 | Casp4         | 12363     | Mus musculus caspase 4, apoptosis-related cysteine peptidase (Casp4), mRNA.                                                                                   |
| 4900279 | 0.04330814  | down | -1.1414021 | Cmya1         | 22437     | PREDICTED: Mus musculus cardiomyopathy associated 1, transcript variant 2 (Cmya1), mRNA.                                                                      |
| 7650246 | 0.020921338 | down | -1.1414058 | Add3          | 27360     | Mus musculus adducin 3 (gamma) (Add3), mRNA.                                                                                                                  |
| 6420368 | 0.020921338 | down | -1.141809  | Gpld1         | 14756     | Mus musculus glycosylphosphatidylinositol specific phospholipase D1 (Gpld1), mRNA.                                                                            |
| 5690491 | 0.04330814  | down | -1.1418779 | Gabpa         | 14390     | Mus musculus GA repeat binding protein, alpha (Gabpa), mRNA.                                                                                                  |
| 4590537 | 0.020921338 | down | -1.1419017 | Syt12         | 83671     | Mus musculus synaptotagmin-like 2 (Syt12), transcript variant 1, mRNA.                                                                                        |
| 7150349 | 0.020921338 | down | -1.1420687 | 2310079N02Rik | 66566     | Mus musculus RIKEN cDNA 2310079N02 gene (2310079N02Rik), mRNA.                                                                                                |
| 1770601 | 0.04330814  | down | -1.142653  | Morf4l1       | 21761     | Mus musculus mortality factor 4 like 1 (Morf4l1), transcript variant 1, mRNA.                                                                                 |
| 2760274 | 0.04330814  | down | -1.1429238 | Epsti1        | 108670    | Mus musculus epithelial stromal interaction 1 (breast) (Epsti1), transcript variant a, mRNA.                                                                  |
| 1850273 | 0.020921338 | down | -1.1432021 | Znhit6        | 229937    | Mus musculus zinc finger, HIT type 6 (Znhit6), mRNA.                                                                                                          |
| 6330369 | 0.04330814  | down | -1.1435397 | Pak1ip1       | 68083     | Mus musculus PAK1 interacting protein 1 (Pak1ip1), mRNA.                                                                                                      |
| 4640356 | 0.04330814  | down | -1.143684  | Acsl4         | 50790     | Mus musculus acyl-CoA synthetase long-chain family member 4 (Acsl4), transcript variant 2, mRNA.                                                              |
| 2600609 | 0.020921338 | down | -1.144188  | 5830433M19Rik | 67770     | Mus musculus RIKEN cDNA 5830433M19 gene (5830433M19Rik), mRNA.                                                                                                |
| 6180753 | 0.020921338 | down | -1.1444181 | Lym2          | 108755    | Mus musculus LYR motif containing 2 (Lym2), mRNA.                                                                                                             |
| 830445  | 0.020921338 | down | -1.1447054 | Slc6a13       | 14412     | Mus musculus solute carrier family 6 (neurotransmitter transporter, GABA), member 13 (Slc6a13), mRNA.                                                         |
| 1110538 | 0.04330814  | down | -1.1448989 | Prei4         | 74182     | Mus musculus preimplantation protein 4 (Prei4), transcript variant 4, mRNA.                                                                                   |
| 1410537 | 0.04330814  | down | -1.1449171 | Prkar1b       | 19085     | Mus musculus protein kinase, cAMP dependent regulatory, type I beta (Prkar1b), mRNA.                                                                          |
| 4010201 | 0.04330814  | down | -1.1449336 | Slc25a15      | 18408     | Mus musculus solute carrier family 25 (mitochondrial carrier ornithine transporter), member 15 (Slc25a15), nuclear gene encoding mitochondrial protein, mRNA. |
| 4760301 | 0.020921338 | down | -1.1451235 | Afmid         | 71562     | Mus musculus arylformamidase (Afmid), mRNA.                                                                                                                   |
| 1850672 | 0.04330814  | down | -1.145264  | V1ra2         | 22297     | Mus musculus vomeronasal 1 receptor, A2 (V1ra2), mRNA.                                                                                                        |
| 4280021 | 0.020921338 | down | -1.1453341 | Spin          |           |                                                                                                                                                               |
| 4220086 | 0.020921338 | down | -1.1453406 | LOC100047028  | 100047028 | PREDICTED: Mus musculus similar to heterochromatin protein 1 beta (LOC100047028), mRNA.                                                                       |
| 2690524 | 0.020921338 | down | -1.1454769 | Lrrc39        | 109245    | Mus musculus leucine rich repeat containing 39 (Lrrc39), transcript variant 2, mRNA.                                                                          |
| 240736  | 0.04330814  | down | -1.1456933 | Rps6ka3       | 110651    | Mus musculus ribosomal protein S6 kinase polypeptide 3 (Rps6ka3), mRNA.                                                                                       |

|         |             |      |            |               |        |                                                                                                                    |
|---------|-------------|------|------------|---------------|--------|--------------------------------------------------------------------------------------------------------------------|
| 1400377 | 0.020921338 | down | -1.1463593 | Sypl          | 19027  | Mus musculus synaptophysin-like protein (Sypl), transcript variant 2, mRNA.                                        |
| 4050619 | 0.020921338 | down | -1.1463672 | Stat5a        | 20850  | Mus musculus signal transducer and activator of transcription 5A (Stat5a), mRNA.                                   |
| 4900242 | 0.020921338 | down | -1.1464382 | Comp          | 12845  | Mus musculus cartilage oligomeric matrix protein (Comp), mRNA.                                                     |
| 5890040 | 0.020921338 | down | -1.1467143 | Afmid         | 71562  | Mus musculus arylformamidase (Afmid), mRNA.                                                                        |
| 730520  | 0.020921338 | down | -1.1469772 | Nif3l1        | 65102  | Mus musculus Ngg1 interacting factor 3-like 1 ( <i>S. pombe</i> ) (Nif3l1), mRNA.                                  |
| 6220487 | 0.04330814  | down | -1.147204  | Zc3h14        | 75553  | Mus musculus zinc finger CCCH type containing 14 (Zc3h14), transcript variant 1, mRNA.                             |
| 5310112 | 0.04330814  | down | -1.1472932 | Vav3          | 57257  | Mus musculus vav 3 oncogene (Vav3), transcript variant 1, mRNA.                                                    |
| 990487  | 0.020921338 | down | -1.147894  | Tbx3          | 21386  | Mus musculus T-box 3 (Tbx3), transcript variant 1, mRNA.                                                           |
| 4810445 | 0.04330814  | down | -1.1478951 | Clock         | 12753  | Mus musculus circadian locomotor output cycles kaput (Clock), mRNA.                                                |
| 7400301 | 0.04330814  | down | -1.1485255 | Ttyh2         | 117160 | Mus musculus tweety homolog 2 ( <i>Drosophila</i> ) (Ttyh2), mRNA.                                                 |
| 7570433 | 0.020921338 | down | -1.1485853 | V1rj3         | 252909 | Mus musculus vomeronasal 1 receptor, J3 (V1rj3), mRNA.                                                             |
| 4260292 | 0.04330814  | down | -1.1485919 | Mr1           |        |                                                                                                                    |
| 4250364 | 0.020921338 | down | -1.1486527 | Dus3l         | 224907 | Mus musculus dihydrouridine synthase 3-like ( <i>S. cerevisiae</i> ) (Dus3l), mRNA.                                |
| 6560424 | 0.04330814  | down | -1.148717  | 1110018J18Rik | 66129  | Mus musculus RIKEN cDNA 1110018J18 gene (1110018J18Rik), mRNA.                                                     |
| 4280224 | 0.020921338 | down | -1.1487467 | Ramp3         | 56089  | Mus musculus receptor (calcitonin) activity modifying protein 3 (Ramp3), mRNA.                                     |
| 6220672 | 0.04330814  | down | -1.1488978 | Ktn1          | 16709  | Mus musculus kinectin 1 (Ktn1), mRNA.                                                                              |
| 3840253 | 0.020921338 | down | -1.1489882 | Ccdc85b       | 240514 | Mus musculus coiled-coil domain containing 85B (Ccdc85b), mRNA.                                                    |
| 240494  | 0.04330814  | down | -1.1498634 | Olf464        | 258407 | Mus musculus olfactory receptor 464 (Olf464), mRNA.                                                                |
| 4540369 | 0.04330814  | down | -1.1500789 | Hdac9         | 79221  | Mus musculus histone deacetylase 9 (Hdac9), mRNA.                                                                  |
| 1230468 | 0.04330814  | down | -1.150127  | Ube3a         | 22215  | Mus musculus ubiquitin protein ligase E3A (Ube3a), transcript variant 3, mRNA.                                     |
| 1010487 | 0.020921338 | down | -1.1502372 | Rsrc1         | 66880  | Mus musculus arginine/serine-rich coiled-coil 1 (Rsrc1), mRNA.                                                     |
| 4810551 | 0.04330814  | down | -1.1502762 | Atg10         | 66795  | Mus musculus autophagy-related 10 (yeast) (Atg10), mRNA.                                                           |
| 60398   | 0.020921338 | down | -1.1503767 | Rffl          | 67338  | Mus musculus ring finger and FYVE like domain containing protein (Rffl), transcript variant 1, mRNA.               |
| 2350019 | 0.04330814  | down | -1.1504211 | Fhl2          | 14200  | Mus musculus four and a half LIM domains 2 (Fhl2), mRNA.                                                           |
| 10102   | 0.020921338 | down | -1.1504737 | Galc          | 14420  | Mus musculus galactosylceramidase (Galc), mRNA.                                                                    |
| 5310682 | 0.020921338 | down | -1.1508931 | Ddef2         | 211914 | Mus musculus development and differentiation enhancing factor 2 (Ddef2), mRNA.                                     |
| 3390373 | 0.020921338 | down | -1.1512262 | Jarid1c       | 20591  | Mus musculus jumonji, AT rich interactive domain 1C (Rbp2 like) (Jarid1c), mRNA.                                   |
| 6560441 | 0.020921338 | down | -1.1516691 | Dync1li1      | 235661 | Mus musculus dynein cytoplasmic 1 light intermediate chain 1 (Dync1li1), mRNA.                                     |
| 5260082 | 0.04330814  | down | -1.152343  | Gpr180        | 58245  | Mus musculus G protein-coupled receptor 180 (Gpr180), mRNA.                                                        |
| 2070170 | 0.020921338 | down | -1.1523861 | Zfand2b       | 68818  | Mus musculus zinc finger, AN1 type domain 2B (Zfand2b), mRNA.                                                      |
| 4860431 | 0.020921338 | down | -1.1527439 | D6Wsu116e     | 28006  | Mus musculus DNA segment, Chr 6, Wayne State University 116, expressed (D6Wsu116e), mRNA.                          |
| 4890270 | 0.04330814  | down | -1.153651  | Wdr1          | 22388  | Mus musculus WD repeat domain 1 (Wdr1), mRNA.                                                                      |
| 2350139 | 0.04330814  | down | -1.1536883 | Denr          | 68184  | Mus musculus density-regulated protein (Denr), mRNA.                                                               |
| 3390646 | 0.04330814  | down | -1.1537367 | Olf66         | 18367  | Mus musculus olfactory receptor 66 (Olf66), mRNA.                                                                  |
| 1850349 | 0.020921338 | down | -1.1538234 | Zmpste24      | 230709 | Mus musculus zinc metallopeptidase, STE24 homolog ( <i>S. cerevisiae</i> ) (Zmpste24), mRNA.                       |
| 2750673 | 0.04330814  | down | -1.1539234 | Tmem183a      | 57439  | Mus musculus transmembrane protein 183A (Tmem183a), transcript variant 2, mRNA.                                    |
| 4210092 | 0.020921338 | down | -1.1541563 | Stx6          | 58244  | Mus musculus syntaxin 6 (Stx6), mRNA.                                                                              |
| 5670767 | 0.04330814  | down | -1.1541932 | F430201B04Rik | 621239 | Mus musculus RIKEN cDNA F430201B04 gene (F430201B04Rik), mRNA.                                                     |
| 2060471 | 0.020921338 | down | -1.1542192 | Ifrg15        | 64164  | Mus musculus interferon alpha responsive gene (Ifrg15), mRNA.                                                      |
| 4760369 | 0.04330814  | down | -1.1543558 | 4930544G11Rik | 67653  | Mus musculus RIKEN cDNA 4930544G11 gene (4930544G11Rik), non-coding RNA.                                           |
| 5870672 | 0.020921338 | down | -1.1545484 | Ankrd27       | 245886 | Mus musculus ankyrin repeat domain 27 (VPS9 domain) (Ankrd27), transcript variant 1, mRNA.                         |
| 7380528 | 0.020921338 | down | -1.1548151 | Ptger3        |        |                                                                                                                    |
| 6590333 | 0.020921338 | down | -1.1550554 | Eif2s2        | 67204  | Mus musculus eukaryotic translation initiation factor 2, subunit 2 (beta) (Eif2s2), mRNA.                          |
| 1050709 | 0.020921338 | down | -1.1552031 | Ankle2        | 71782  | Mus musculus ankyrin repeat and LEM domain containing 2 (Ankle2), mRNA.                                            |
| 2340717 | 0.020921338 | down | -1.1552459 | App1          | 72993  | Mus musculus adaptor protein, phosphotyrosine interaction, PH domain and leucine zipper containing 1 (App1), mRNA. |
| 7320064 | 0.020921338 | down | -1.15551   | Gstz1         | 14874  | Mus musculus glutathione transferase zeta 1 (maleylacetoacetate isomerase) (Gstz1), mRNA.                          |
| 4540424 | 0.04330814  | down | -1.1556578 | Nudcd2        | 52653  | Mus musculus NudC domain containing 2 (Nudcd2), mRNA.                                                              |
| 6060451 | 0.020921338 | down | -1.1559616 | Ube2d2        | 56550  | Mus musculus ubiquitin-conjugating enzyme E2D 2 (Ube2d2), mRNA.                                                    |
| 1850338 | 0.020921338 | down | -1.1567179 | Cacnb4        | 12298  | Mus musculus calcium channel, voltage-dependent, beta 4 subunit (Cacnb4), transcript variant 2, mRNA.              |
| 1190706 | 0.04330814  | down | -1.1574064 | Rab27b        | 80718  | Mus musculus RAB27b, member RAS oncogene family (Rab27b), transcript variant 1, mRNA.                              |
| 1450358 | 0.020921338 | down | -1.1582327 | Sf3b4         | 107701 | Mus musculus splicing factor 3b, subunit 4 (Sf3b4), mRNA.                                                          |
| 7040114 | 0.04330814  | down | -1.1587925 | Gpr45         | 93690  | Mus musculus G protein-coupled receptor 45 (Gpr45), mRNA.                                                          |
| 1740692 | 0.04330814  | down | -1.1592692 | Fasl          | 14103  | Mus musculus Fas ligand (TNF superfamily, member 6) (Fasl), mRNA.                                                  |
| 2600008 | 0.020921338 | down | -1.1592878 | Rnf111        | 93836  | Mus musculus ring finger 111 (Rnf111), mRNA.                                                                       |

|         |             |      |            |               |           |                                                                                                       |
|---------|-------------|------|------------|---------------|-----------|-------------------------------------------------------------------------------------------------------|
| 1710161 | 0.020921338 | down | -1.1595374 | Klhdc10       | 76788     | Mus musculus kelch domain containing 10 (Klhdc10), mRNA.                                              |
| 1170072 | 0.04330814  | down | -1.1595454 | Spint2        | 20733     | Mus musculus serine protease inhibitor, Kunitz type 2 (Spint2), transcript variant 1, mRNA.           |
| 1740441 | 0.020921338 | down | -1.1598518 | Ncoa4         | 27057     | Mus musculus nuclear receptor coactivator 4 (Ncoa4), transcript variant 2, mRNA.                      |
| 1980056 | 0.04330814  | down | -1.1599432 | Nkx2-5        | 18091     | Mus musculus NK2 transcription factor related, locus 5 (Drosophila) (Nkx2-5), mRNA.                   |
| 7150086 | 0.04330814  | down | -1.1599813 | Aptx          | 66408     | Mus musculus aprataxin (Aptx), transcript variant 1, mRNA.                                            |
| 4570278 | 0.020921338 | down | -1.1600155 | Krt15         | 16665     | Mus musculus keratin 15 (Krt15), mRNA.                                                                |
| 2000156 | 0.04330814  | down | -1.1602746 | AU014645      | 433702    | Mus musculus expressed sequence AU014645 (AU014645), mRNA.                                            |
| 4920730 | 0.04330814  | down | -1.1606464 | Nsun5         | 100609    | Mus musculus NOL1/NOP2/Sun domain family, member 5 (Nsun5), mRNA.                                     |
| 3360431 | 0.020921338 | down | -1.160844  | Lhfp          | 108927    | Mus musculus lipoma HMGIC fusion partner (Lhfp), mRNA.                                                |
| 2030487 | 0.04330814  | down | -1.161405  | AI747699      | 381236    | Mus musculus expressed sequence AI747699 (AI747699), mRNA.                                            |
| 2070593 | 0.020921338 | down | -1.1618465 | Krt10         | 16661     | Mus musculus keratin 10 (Krt10), mRNA.                                                                |
| 5560576 | 0.04330814  | down | -1.1625881 | 1190002N15Rik | 68861     | Mus musculus RIKEN cDNA 1190002N15 gene (1190002N15Rik), mRNA.                                        |
| 4780278 | 0.020921338 | down | -1.1634856 | Ing5          | 66262     | Mus musculus inhibitor of growth family, member 5 (Ing5), mRNA.                                       |
| 2900338 | 0.020921338 | down | -1.1635128 | Stc2          | 20856     | Mus musculus stanniocalcin 2 (Stc2), mRNA.                                                            |
| 6290369 | 0.04330814  | down | -1.1638801 | Tor1a         | 30931     | Mus musculus torsin family 1, member A (torsin A) (Tor1a), mRNA.                                      |
| 5130176 | 0.020921338 | down | -1.1639246 | Pou3f1        | 18991     | Mus musculus POU domain, class 3, transcription factor 1 (Pou3f1), mRNA.                              |
| 6250192 | 0.04330814  | down | -1.1642786 | Agxt2l2       | 72947     | Mus musculus alanine-glyoxylate aminotransferase 2-like 2 (Agxt2l2), mRNA.                            |
| 5690609 | 0.020921338 | down | -1.1643419 | Rnf144a       | 108089    | Mus musculus ring finger protein 144A (Rnf144a), transcript variant 2, mRNA.                          |
| 1850687 | 0.020921338 | down | -1.1652566 | LOC100047837  | 100047837 | PREDICTED: Mus musculus similar to Myocyte enhancer factor 2A (LOC100047837), mRNA.                   |
| 5290379 | 0.020921338 | down | -1.1663721 | Atp11c        | 320940    | Mus musculus ATPase, class VI, type 11C (Atp11c), transcript variant 1, mRNA.                         |
| 990066  | 0.04330814  | down | -1.1664456 | Sars          | 20226     | Mus musculus seryl-aminoacyl-tRNA synthetase (Sars), mRNA.                                            |
| 4390364 | 0.04330814  | down | -1.1665429 | Smc3          | 13006     | Mus musculus structural maintenance of chromosomes 3 (Smc3), mRNA.                                    |
| 2360291 | 0.04330814  | down | -1.1665659 | Zbtb33        | 56805     | Mus musculus zinc finger and BTB domain containing 33 (Zbtb33), transcript variant 2, mRNA.           |
| 2760520 | 0.020921338 | down | -1.1665837 | Gzmd          | 14941     | Mus musculus granzyme D (Gzmd), mRNA.                                                                 |
| 3190274 | 0.020921338 | down | -1.1667141 | Nup50         | 18141     | Mus musculus nucleoporin 50 (Nup50), mRNA.                                                            |
| 7320202 | 0.04330814  | down | -1.1670434 | Ptgir         | 19222     | Mus musculus prostaglandin I receptor (IP) (Ptgir), mRNA.                                             |
| 6250059 | 0.04330814  | down | -1.1670716 | Hnrnpul1      | 232989    | Mus musculus heterogeneous nuclear ribonucleoprotein U-like 1 (Hnrnpul1), transcript variant 2, mRNA. |
| 6480242 | 0.04330814  | down | -1.1672003 | Tmem209       | 72649     | Mus musculus transmembrane protein 209 (Tmem209), mRNA.                                               |
| 4810672 | 0.04330814  | down | -1.1674551 | Spire1        |           |                                                                                                       |
| 6550446 | 0.020921338 | down | -1.167473  | Rab5a         | 271457    | Mus musculus RAB5A, member RAS oncogene family (Rab5a), mRNA.                                         |
| 3890273 | 0.04330814  | down | -1.1676837 | Popdc2        | 64082     | Mus musculus popeye domain containing 2 (Popdc2), transcript variant 2, mRNA.                         |
| 7040133 | 0.04330814  | down | -1.1678712 | Avpi1         | 69534     | Mus musculus arginine vasopressin-induced 1 (Avpi1), mRNA.                                            |
| 5310091 | 0.020921338 | down | -1.1686652 | Add3          | 27360     | Mus musculus adducin 3 (gamma) (Add3), mRNA.                                                          |
| 5810661 | 0.020921338 | down | -1.1692045 | Ube1c         | 22200     | Mus musculus ubiquitin-activating enzyme E1C (Ube1c), mRNA.                                           |
| 3420746 | 0.04330814  | down | -1.1694306 | Osbp19        | 100273    | Mus musculus oxysterol binding protein-like 9 (Osbp19), transcript variant 2, mRNA.                   |
| 6200762 | 0.04330814  | down | -1.1694762 | Slc5a6        | 330064    | Mus musculus solute carrier family 5 (sodium-dependent vitamin transporter), member 6 (Slc5a6), mRNA. |
| 3400474 | 0.04330814  | down | -1.1696838 | Map2k6        | 26399     | Mus musculus mitogen-activated protein kinase kinase 6 (Map2k6), mRNA.                                |
| 3440204 | 0.020921338 | down | -1.1696849 | A130038H09Rik | 381091    | Mus musculus RIKEN cDNA A130038H09 gene (A130038H09Rik), mRNA.                                        |
| 2630189 | 0.04330814  | down | -1.1699761 | Net1          | 56349     | Mus musculus neuroepithelial cell transforming gene 1 (Net1), transcript variant 2, mRNA.             |
| 3780040 | 0.020921338 | down | -1.1699923 | Taf9b         | 407786    | Mus musculus TAF9B RNA polymerase II, TATA box binding protein (TBP)-associated factor (Taf9b), mRNA. |
| 7000601 | 0.020921338 | down | -1.1701764 | Il1rap        | 16180     | Mus musculus interleukin 1 receptor accessory protein (Il1rap), transcript variant 1, mRNA.           |
| 7200463 | 0.020921338 | down | -1.1703087 | 553060119Rik  |           |                                                                                                       |
| 6660743 | 0.04330814  | down | -1.1703591 | BC052055      | 328643    | Mus musculus cDNA sequence BC052055 (BC052055), mRNA.                                                 |
| 3440246 | 0.04330814  | down | -1.1705334 | Fam118a       | 73225     | Mus musculus family with sequence similarity 118, member A (Fam118a), transcript variant 2, mRNA.     |
| 2480347 | 0.020921338 | down | -1.1707987 | Cxxc1         | 74322     | Mus musculus CXXC finger 1 (PHD domain) (Cxxc1), mRNA.                                                |
| 4670056 | 0.020921338 | down | -1.1713426 | Hexb          | 15212     | Mus musculus hexosaminidase B (Hexb), mRNA.                                                           |
| 7560576 | 0.04330814  | down | -1.171406  | Dnajc8        | 68598     | Mus musculus DnaJ (Hsp40) homolog, subfamily C, member 8 (Dnajc8), mRNA.                              |
| 3930392 | 0.020921338 | down | -1.1714752 | Oxnad1        | 218885    | Mus musculus oxidoreductase NAD-binding domain containing 1 (Oxnad1), mRNA.                           |
| 1940736 | 0.04330814  | down | -1.1716417 | Ptprr         | 19279     | Mus musculus protein tyrosine phosphatase, receptor type, R (Ptprr), mRNA.                            |
| 450524  | 0.020921338 | down | -1.1718065 | Rabgap1l      | 29809     | Mus musculus RAB GTPase activating protein 1-like (Rabgap1l), transcript variant 1, mRNA.             |
| 2140328 | 0.04330814  | down | -1.1719587 | Rad51l3       | 19364     | Mus musculus RAD51-like 3 (S. cerevisiae) (Rad51l3), mRNA.                                            |



|         |             |      |            |               |        |                                                                                                                                             |
|---------|-------------|------|------------|---------------|--------|---------------------------------------------------------------------------------------------------------------------------------------------|
| 4210273 | 0.020921338 | down | -1.1720237 | Arpp21        | 74100  | Mus musculus cyclic AMP-regulated phosphoprotein, 21 (Arpp21), transcript variant 1, mRNA.                                                  |
| 1030259 | 0.04330814  | down | -1.1726658 | Chfr          | 231600 | Mus musculus checkpoint with forkhead and ring finger domains (Chfr), mRNA.                                                                 |
| 150180  | 0.04330814  | down | -1.172728  | Gnb1l         | 13972  | Mus musculus guanine nucleotide binding protein (G protein), beta polypeptide 1-like (Gnb1l), transcript variant 2, mRNA.                   |
| 6860056 | 0.04330814  | down | -1.1739061 | Atp5j         | 11957  | Mus musculus ATP synthase, H+ transporting, mitochondrial F0 complex, subunit F (Atp5j), nuclear gene encoding mitochondrial protein, mRNA. |
| 6960056 | 0.020921338 | down | -1.1742499 | Vps33b        | 233405 | Mus musculus vacuolar protein sorting 33B (yeast) (Vps33b), mRNA.                                                                           |
| 1410324 | 0.04330814  | down | -1.1744254 | Tor1a         | 30931  | Mus musculus torsin family 1, member A (torsin A) (Tor1a), mRNA.                                                                            |
| 20047   | 0.020921338 | down | -1.1752944 | Mbd3l2        | 234988 | Mus musculus methyl-CpG binding domain protein 3-like 2 (Mbd3l2), mRNA.                                                                     |
| 3940592 | 0.020921338 | down | -1.1753432 | Tmem132d      | 243274 | Mus musculus transmembrane protein 132D (Tmem132d), mRNA.                                                                                   |
| 5960037 | 0.020921338 | down | -1.1756537 | Cycc          | 13063  | Mus musculus cytochrome c, somatic (Cycc), mRNA.                                                                                            |
| 1710577 | 0.04330814  | down | -1.1757965 | Guca1a        | 14913  | Mus musculus guanylate cyclase activator 1a (retina) (Guca1a), mRNA.                                                                        |
| 730594  | 0.020921338 | down | -1.1762474 | Krr1          | 52705  | Mus musculus KRR1, small subunit (SSU) processome component, homolog (yeast) (Krr1), mRNA.                                                  |
| 2190093 | 0.04330814  | down | -1.1762494 | Sft2d2        | 108735 | Mus musculus SFT2 domain containing 2 (Sft2d2), mRNA.                                                                                       |
| 4880736 | 0.020921338 | down | -1.1762768 | C8b           | 110382 | Mus musculus complement component 8, beta polypeptide (C8b), mRNA.                                                                          |
| 5090379 | 0.020921338 | down | -1.1764083 | Alg10b        | 380959 | Mus musculus asparagine-linked glycosylation 10 homolog B (yeast, alpha-1,2-glucosyltransferase) (Alg10b), mRNA. XM_922905                  |
| 6100672 | 0.020921338 | down | -1.1766506 | 2810030E01Rik | 72668  | Mus musculus RIKEN cDNA 2810030E01 gene (2810030E01Rik), mRNA.                                                                              |
| 540762  | 0.020921338 | down | -1.1767544 | Xpa           | 22590  | Mus musculus xeroderma pigmentosum, complementation group A (Xpa), mRNA.                                                                    |
| 870022  | 0.020921338 | down | -1.1772199 | Zfp330        | 30932  | Mus musculus zinc finger protein 330 (Zfp330), mRNA.                                                                                        |
| 650626  | 0.04330814  | down | -1.177251  | Rwdd3         | 73170  | Mus musculus RWD domain containing 3 (Rwdd3), mRNA.                                                                                         |
| 4810180 | 0.020921338 | down | -1.1773243 | Ccdc59        | 52713  | Mus musculus coiled-coil domain containing 59 (Ccdc59), mRNA.                                                                               |
| 4200270 | 0.020921338 | down | -1.1774926 | Zfx           | 22764  | Mus musculus zinc finger protein X-linked (Zfx), transcript variant 1, mRNA.                                                                |
| 2750369 | 0.020921338 | down | -1.177746  | Ppp2cz        |        |                                                                                                                                             |
| 1580369 | 0.04330814  | down | -1.1777945 | Gpr1          | 241070 | Mus musculus G protein-coupled receptor 1 (Gpr1), mRNA.                                                                                     |
| 6110079 | 0.04330814  | down | -1.177807  | Prpf38a       | 230596 | Mus musculus PRP38 pre-mRNA processing factor 38 (yeast) domain containing A (Prpf38a), mRNA.                                               |
| 2570129 | 0.04330814  | down | -1.1778463 | 2310047C04Rik | 224170 | Mus musculus RIKEN cDNA 2310047C04 gene (2310047C04Rik), mRNA.                                                                              |
| 6620360 | 0.04330814  | down | -1.1784718 | 6330500D04Rik | 193385 | Mus musculus RIKEN cDNA 6330500D04 gene (6330500D04Rik), transcript variant 2, mRNA.                                                        |
| 5290634 | 0.020921338 | down | -1.1791788 | Lnpep         | 240028 | Mus musculus leucyl/cystinyl aminopeptidase (Lnpep), mRNA.                                                                                  |
| 6450471 | 0.020921338 | down | -1.1795365 | Itgae         | 16407  | Mus musculus integrin, alpha E, epithelial-associated (Itgae), transcript variant 2, mRNA.                                                  |
| 4830370 | 0.020921338 | down | -1.1795378 | Gm71          | 207965 | Mus musculus gene model 71, (NCBI) (Gm71), mRNA.                                                                                            |
| 6450021 | 0.020921338 | down | -1.1796068 | Elmo1         | 140580 | Mus musculus engulfment and cell motility 1, ced-12 homolog (C. elegans) (Elmo1), transcript variant 1, mRNA.                               |
| 1850047 | 0.04330814  | down | -1.180057  | Nfu1          | 56748  | Mus musculus NFU1 iron-sulfur cluster scaffold homolog (S. cerevisiae) (Nfu1), mRNA.                                                        |
| 1990026 | 0.020921338 | down | -1.1801032 | Arl9          | 384185 | Mus musculus ADP-ribosylation factor-like 9 (Arl9), mRNA.                                                                                   |
| 5270156 | 0.020921338 | down | -1.1805308 | Thbs3         | 21827  | Mus musculus thrombospondin 3 (Thbs3), mRNA.                                                                                                |
| 830463  | 0.020921338 | down | -1.1813241 | Klh9          | 242521 | Mus musculus kelch-like 9 (Drosophila) (Klh9), mRNA.                                                                                        |
| 6940653 | 0.020921338 | down | -1.1814586 | C030048B08Rik | 269623 | Mus musculus RIKEN cDNA C030048B08 gene (C030048B08Rik), mRNA.                                                                              |
| 5900445 | 0.04330814  | down | -1.1819084 | Siah1a        | 20437  | Mus musculus seven in absentia 1A (Siah1a), mRNA.                                                                                           |
| 3400592 | 0.020921338 | down | -1.1819874 | Tsr2          | 69499  | Mus musculus TSR2, 20S rRNA accumulation, homolog (S. cerevisiae) (Tsr2), mRNA.                                                             |
| 5870482 | 0.04330814  | down | -1.1820836 | Toe1          | 68276  | Mus musculus target of EGR1, member 1 (nuclear) (Toe1), mRNA.                                                                               |
| 6510519 | 0.020921338 | down | -1.1821687 | Clec1a        | 243653 | Mus musculus C-type lectin domain family 1, member a (Clec1a), mRNA.                                                                        |
| 3440431 | 0.020921338 | down | -1.1822728 | U2af2         | 22185  | Mus musculus U2 small nuclear ribonucleoprotein auxiliary factor (U2AF) 2 (U2af2), mRNA.                                                    |
| 7050112 | 0.04330814  | down | -1.182394  | Rnf138        | 56515  | Mus musculus ring finger protein 138 (Rnf138), transcript variant 2, mRNA.                                                                  |
| 4180458 | 0.04330814  | down | -1.182402  | Etfa          | 110842 | Mus musculus electron transferring flavoprotein, alpha polypeptide (Etfa), nuclear gene encoding mitochondrial protein, mRNA.               |
| 1260102 | 0.020921338 | down | -1.1824766 | Frat1         | 14296  | Mus musculus frequently rearranged in advanced T-cell lymphomas (Frat1), mRNA.                                                              |
| 2360475 | 0.020921338 | down | -1.1838671 | Papd1         | 67440  | Mus musculus PAP associated domain containing 1 (Papd1), mRNA.                                                                              |
| 5290438 | 0.04330814  | down | -1.1839387 | Ela1          | 109901 | Mus musculus elastase 1, pancreatic (Ela1), mRNA.                                                                                           |
| 5810747 | 0.04330814  | down | -1.1842151 | Atp2c1        | 235574 | Mus musculus ATPase, Ca++-sequestering (Atp2c1), mRNA. XM_920852                                                                            |
| 7610692 | 0.020921338 | down | -1.1853019 | Prpf18        | 67229  | Mus musculus PRP18 pre-mRNA processing factor 18 homolog (yeast) (Prpf18), mRNA.                                                            |
| 2120279 | 0.04330814  | down | -1.1853467 | Tmem167b      | 67495  | Mus musculus transmembrane protein 167B (Tmem167b), mRNA.                                                                                   |
| 6290328 | 0.020921338 | down | -1.1854336 | Nos3          | 18127  | Mus musculus nitric oxide synthase 3, endothelial cell (Nos3), mRNA.                                                                        |
| 5420224 | 0.04330814  | down | -1.1855481 | Tfdp1         |        |                                                                                                                                             |
| 2810273 | 0.020921338 | down | -1.1856359 | Tspan17       | 74257  | Mus musculus tetraspanin 17 (Tspan17), mRNA.                                                                                                |
| 6510709 | 0.020921338 | down | -1.1858573 | Olf1437       | 258117 | Mus musculus olfactory receptor 1437 (Olf1437), mRNA.                                                                                       |
| 4780609 | 0.020921338 | down | -1.1861625 | Zfp238        | 30928  | Mus musculus zinc finger protein 238 (Zfp238), transcript variant 1, mRNA.                                                                  |

|         |             |      |            |               |           |                                                                                                                         |
|---------|-------------|------|------------|---------------|-----------|-------------------------------------------------------------------------------------------------------------------------|
| 4590193 | 0.020921338 | down | -1.1861778 | Tcte3         | 21647     | Mus musculus t-complex-associated testis expressed 3 (Tcte3), transcript variant 1, mRNA.                               |
| 6840608 | 0.020921338 | down | -1.1866678 | Mdm1          | 17245     | Mus musculus transformed mouse 3T3 cell double minute 1 (Mdm1), transcript variant 2, mRNA.                             |
| 160731  | 0.020921338 | down | -1.186749  | Mier1         | 71148     | Mus musculus mesoderm induction early response 1 homolog (Xenopus laevis (Mier1), transcript variant 1, mRNA.           |
| 4260747 | 0.04330814  | down | -1.1869261 | Uba1          | 22201     | Mus musculus ubiquitin-like modifier activating enzyme 1 (Uba1), mRNA.                                                  |
| 5390754 | 0.020921338 | down | -1.1874503 | Pik3cd        | 18707     | Mus musculus phosphatidylinositol 3-kinase catalytic delta polypeptide (Pik3cd), transcript variant 1, mRNA.            |
| 6290100 | 0.020921338 | down | -1.1879344 | Acsl4         |           |                                                                                                                         |
| 3830563 | 0.020921338 | down | -1.1879821 | Thap1         | 73754     | Mus musculus THAP domain containing, apoptosis associated protein 1 (Thap1), mRNA.                                      |
| 2070687 | 0.04330814  | down | -1.1879977 | Dhps          | 330817    | Mus musculus deoxyhypusine synthase (Dhps), mRNA.                                                                       |
| 10369   | 0.020921338 | down | -1.1881535 | 5830484A20Rik |           |                                                                                                                         |
| 2850594 | 0.04330814  | down | -1.1882565 | Gtf2b         | 229906    | Mus musculus general transcription factor IIB (Gtf2b), mRNA.                                                            |
| 7210615 | 0.020921338 | down | -1.1886878 | Hacl1         | 56794     | Mus musculus 2-hydroxyacyl-CoA lyase 1 (Hacl1), mRNA.                                                                   |
| 2030215 | 0.04330814  | down | -1.1889942 | Capzb         | 12345     | Mus musculus capping protein (actin filament) muscle Z-line, beta (Capzb), transcript variant 1, mRNA.                  |
| 5720593 | 0.020921338 | down | -1.1893182 | Afmid         | 71562     | Mus musculus arylformamidase (Afmid), mRNA.                                                                             |
| 7400017 | 0.04330814  | down | -1.1894449 | 6330577E15Rik |           |                                                                                                                         |
| 7380519 | 0.020921338 | down | -1.1895671 | Tmem88        | 67020     | Mus musculus transmembrane protein 88 (Tmem88), mRNA.                                                                   |
| 4250048 | 0.020921338 | down | -1.1896151 | Rfwd3         | 234736    | Mus musculus ring finger and WD repeat domain 3 (Rfwd3), mRNA.                                                          |
| 7050370 | 0.020921338 | down | -1.1902659 | Uck2          | 80914     | Mus musculus uridine-cytidine kinase 2 (Uck2), mRNA.                                                                    |
| 4180201 | 0.04330814  | down | -1.1903853 | 2410127L17Rik | 67383     | Mus musculus RIKEN cDNA 2410127L17 gene (2410127L17Rik), mRNA.                                                          |
| 2260528 | 0.020921338 | down | -1.1904508 | Ttyh2         |           |                                                                                                                         |
| 360343  | 0.020921338 | down | -1.1907349 | Agxt2l2       | 72947     | Mus musculus alanine-glyoxylate aminotransferase 2-like 2 (Agxt2l2), mRNA.                                              |
| 1070274 | 0.020921338 | down | -1.1912212 | St3gal4       | 20443     | Mus musculus ST3 beta-galactoside alpha-2,3-sialyltransferase 4 (St3gal4), mRNA.                                        |
| 1260414 | 0.020921338 | down | -1.1912504 | Lrriq2        |           |                                                                                                                         |
| 6560593 | 0.04330814  | down | -1.1913527 | 1500003O03Rik |           |                                                                                                                         |
| 630463  | 0.020921338 | down | -1.1913804 | Sgip1         | 73094     | Mus musculus SH3-domain GRB2-like (endophilin) interacting protein 1 (Sgip1), mRNA.                                     |
| 6270634 | 0.020921338 | down | -1.1914381 | 9830002I17Rik |           |                                                                                                                         |
| 4540594 | 0.020921338 | down | -1.1920699 | Rai12         | 54351     | Mus musculus retinoic acid induced 12 (Rai12), mRNA.                                                                    |
| 7570554 | 0.020921338 | down | -1.1932796 | Riok1         | 71340     | Mus musculus RIO kinase 1 (yeast) (Riok1), mRNA.                                                                        |
| 7380717 | 0.020921338 | down | -1.1934866 | N6amt1        | 67768     | Mus musculus N-6 adenine-specific DNA methyltransferase 1 (putative) (N6amt1), mRNA.                                    |
| 5290601 | 0.020921338 | down | -1.1940525 | Tgfa          | 21802     | Mus musculus transforming growth factor alpha (Tgfa), mRNA.                                                             |
| 5910112 | 0.020921338 | down | -1.1940668 | Usp22         | 216825    | Mus musculus ubiquitin specific peptidase 22 (Usp22), mRNA.                                                             |
| 6370025 | 0.020921338 | down | -1.1943595 | Slc35b3       | 108652    | Mus musculus solute carrier family 35, member B3 (Slc35b3), mRNA.                                                       |
| 450521  | 0.020921338 | down | -1.1945018 | Eif2b5        | 224045    | Mus musculus eukaryotic translation initiation factor 2B, subunit 5 epsilon (Eif2b5), mRNA.                             |
| 2940521 | 0.04330814  | down | -1.1946133 | LOC100046959  | 100046959 | PREDICTED: Mus musculus similar to zinc finger protein 533 (LOC100046959), mRNA.                                        |
| 3450768 | 0.04330814  | down | -1.1947834 | Ankrd54       | 223690    | Mus musculus ankyrin repeat domain 54 (Ankrd54), mRNA.                                                                  |
| 7570403 | 0.04330814  | down | -1.1948055 | E430028B21Rik | 211948    | Mus musculus RIKEN cDNA E430028B21 gene (E430028B21Rik), mRNA.                                                          |
| 1090605 | 0.020921338 | down | -1.1948482 | Tsyp13        | 241732    | Mus musculus TSPY-like 3 (Tsyp13), mRNA.                                                                                |
| 6980612 | 0.020921338 | down | -1.1950241 | Lrrc1         | 214345    | Mus musculus leucine rich repeat containing 1 (Lrrc1), mRNA.                                                            |
| 4220296 | 0.020921338 | down | -1.1951958 | LOC100048480  | 100048480 | PREDICTED: Mus musculus similar to ubiquinol-cytochrome c reductase binding protein (LOC100048480), mRNA.               |
| 2480450 | 0.04330814  | down | -1.1953183 | Bclp2         | 229687    | PREDICTED: Mus musculus chitinase like protein 2 (Bclp2), mRNA.                                                         |
| 2470070 | 0.04330814  | down | -1.1954017 | Klf16         | 118445    | Mus musculus Kruppel-like factor 16 (Klf16), mRNA.                                                                      |
| 3190239 | 0.020921338 | down | -1.1958361 | Nup155        | 170762    | Mus musculus nucleoporin 155 (Nup155), mRNA.                                                                            |
| 4250343 | 0.020164572 | down | -1.1959919 | 1110059E24Rik | 66206     | Mus musculus RIKEN cDNA 1110059E24 gene (1110059E24Rik), mRNA.                                                          |
| 5860154 | 0.04330814  | down | -1.1959949 | Lst1          |           |                                                                                                                         |
| 2230195 | 0.020921338 | down | -1.1961359 | Myb           | 17863     | Mus musculus myeloblastosis oncogene (Myb), mRNA.                                                                       |
| 1820195 | 0.04330814  | down | -1.1966249 | Zfand2b       | 68818     | Mus musculus zinc finger, AN1 type domain 2B (Zfand2b), mRNA.                                                           |
| 1430711 | 0.020921338 | down | -1.196875  | Rnf14         | 56736     | Mus musculus ring finger protein 14 (Rnf14), mRNA.                                                                      |
| 5090450 | 0.04330814  | down | -1.1974785 | Cdc42se1      | 57912     | Mus musculus CDC42 small effector 1 (Cdc42se1), transcript variant 1, mRNA.                                             |
| 3870750 | 0.04330814  | down | -1.1974908 | Rdh1          | 107605    | Mus musculus retinol dehydrogenase 1 (all trans) (Rdh1), mRNA.                                                          |
| 360673  | 0.04330814  | down | -1.198435  | Mcat          | 223722    | Mus musculus malonyl CoA:ACP acyltransferase (mitochondrial) (Mcat), nuclear gene encoding mitochondrial protein, mRNA. |
| 4540487 | 0.020921338 | down | -1.1984875 | Snx26         | 233071    | Mus musculus sorting nexin 26 (Snx26), mRNA.                                                                            |
| 1030753 | 0.04330814  | down | -1.1991473 | C78339        | 97863     | Mus musculus expressed sequence C78339 (C78339), mRNA.                                                                  |
| 6330561 | 0.020921338 | down | -1.1993911 | Lamp2         | 16784     | Mus musculus lysosomal-associated membrane protein 2 (Lamp2), transcript variant 1, mRNA.                               |
| 6400333 | 0.020921338 | down | -1.1995548 | Acox1         | 74121     | Mus musculus acyl-Coenzyme A oxidase-like (Acox1), mRNA.                                                                |
| 130064  | 0.020164572 | down | -1.1995995 | Nup54         | 269113    | Mus musculus nucleoporin 54 (Nup54), mRNA.                                                                              |
| 840291  | 0.020921338 | down | -1.2012208 | Lsm12         | 268490    | Mus musculus LSM12 homolog (S. cerevisiae) (Lsm12), mRNA.                                                               |
| 6250072 | 0.04330814  | down | -1.2016551 | Prmt7         | 214572    | Mus musculus protein arginine N-methyltransferase 7 (Prmt7), mRNA.                                                      |
| 20112   | 0.020921338 | down | -1.20193   | Mak10         | 78689     | Mus musculus MAK10 homolog, amino-acid N-acetyltransferase subunit, (S. cerevisiae) (Mak10), mRNA.                      |

|         |             |      |            |               |           |                                                                                                                                                               |
|---------|-------------|------|------------|---------------|-----------|---------------------------------------------------------------------------------------------------------------------------------------------------------------|
| 1070204 | 0.04330814  | down | -1.2019346 | Ldlr          | 16835     | Mus musculus low density lipoprotein receptor (Ldlr), mRNA. XM_979210 XM_979251                                                                               |
| 3850187 | 0.020921338 | down | -1.2021524 | 2210418O10Rik | 76958     | Mus musculus RIKEN cDNA 2210418O10 gene (2210418O10Rik), transcript variant 1, mRNA.                                                                          |
| 1660669 | 0.04330814  | down | -1.2021854 | Fxn           | 14297     | Mus musculus frataxin (Fxn), mRNA.                                                                                                                            |
| 2370301 | 0.020921338 | down | -1.2023643 | Kbtbd2        | 210973    | Mus musculus kelch repeat and BTB (POZ) domain containing 2 (Kbtbd2), mRNA.                                                                                   |
| 4060576 | 0.04330814  | down | -1.2033044 | 6330409N04Rik | 66674     | Mus musculus RIKEN cDNA 6330409N04 gene (6330409N04Rik), mRNA.                                                                                                |
| 6200528 | 0.04330814  | down | -1.2034494 | Rnaseh1       | 19819     | Mus musculus ribonuclease H1 (Rnaseh1), mRNA.                                                                                                                 |
| 4230224 | 0.04330814  | down | -1.2034916 | Trabd         | 67976     | Mus musculus TraB domain containing (Trabd), mRNA.                                                                                                            |
| 6510176 | 0.04330814  | down | -1.2037067 | Uhrf1bp1l     | 75089     | Mus musculus UHRF1 (ICBP90) binding protein 1-like (Uhrf1bp1l), mRNA.                                                                                         |
| 2940487 | 0.020921338 | down | -1.2038162 | Ppm2c         | 381511    | Mus musculus protein phosphatase 2C, magnesium dependent, catalytic subunit (Ppm2c), nuclear gene encoding mitochondrial protein, transcript variant 1, mRNA. |
| 4560626 | 0.04330814  | down | -1.2040446 | Glo1          | 109801    | Mus musculus glyoxalase 1 (Glo1), mRNA.                                                                                                                       |
| 6100687 | 0.04330814  | down | -1.2040764 | Arhgap20      | 244867    | Mus musculus Rho GTPase activating protein 20 (Arhgap20), mRNA.                                                                                               |
| 3290239 | 0.04330814  | down | -1.2042152 | Plvap         | 84094     | Mus musculus plasmalemma vesicle associated protein (Plvap), mRNA.                                                                                            |
| 2570747 | 0.04330814  | down | -1.2042216 | Ube2k         | 53323     | Mus musculus ubiquitin-conjugating enzyme E2K (UBC1 homolog, yeast) (Ube2k), mRNA.                                                                            |
| 5670364 | 0.04330814  | down | -1.2044548 | Ndufb11       | 104130    | Mus musculus NADH dehydrogenase (ubiquinone) 1 beta subcomplex, 11 (Ndufb11), mRNA.                                                                           |
| 5560370 | 0.020921338 | down | -1.2047315 | 2810022L02Rik | 67198     | Mus musculus RIKEN cDNA 2810022L02 gene (2810022L02Rik), mRNA.                                                                                                |
| 3130687 | 0.020921338 | down | -1.2049122 | Tdpoz1        | 207213    | Mus musculus TD and POZ domain containing 1 (Tdpoz1), mRNA.                                                                                                   |
| 1070170 | 0.04330814  | down | -1.2049252 | 0610007P22Rik | 68327     | Mus musculus RIKEN cDNA 0610007P22 gene (0610007P22Rik), mRNA.                                                                                                |
| 6550408 | 0.04330814  | down | -1.20512   | Ing4          | 28019     | Mus musculus inhibitor of growth family, member 4 (Ing4), mRNA.                                                                                               |
| 4590577 | 0.04330814  | down | -1.2056034 | Krtap8-2      | 16704     | Mus musculus keratin associated protein 8-2 (Krtap8-2), mRNA.                                                                                                 |
| 2370279 | 0.020921338 | down | -1.2057897 | Phca          | 66190     | Mus musculus phytoceramidase, alkaline (Phca), mRNA.                                                                                                          |
| 160291  | 0.020921338 | down | -1.2058331 | Bbs9          | 319845    | Mus musculus Bardet-Biedl syndrome 9 (Bbs9), mRNA.                                                                                                            |
| 150128  | 0.020921338 | down | -1.2068076 | Hip2          |           |                                                                                                                                                               |
| 1580240 | 0.020921338 | down | -1.2068759 | Nlk           | 18099     | Mus musculus nemo like kinase (Nlk), mRNA.                                                                                                                    |
| 5860022 | 0.020921338 | down | -1.2075659 | Fbxo27        | 233040    | Mus musculus F-box protein 27 (Fbxo27), mRNA.                                                                                                                 |
| 4850521 | 0.020921338 | down | -1.2075719 | Adh1          | 11522     | Mus musculus alcohol dehydrogenase 1 (class I) (Adh1), mRNA.                                                                                                  |
| 6550689 | 0.04330814  | down | -1.2075896 | Atp6ap1       | 54411     | Mus musculus ATPase, H+ transporting, lysosomal accessory protein 1 (Atp6ap1), mRNA.                                                                          |
| 6960170 | 0.020921338 | down | -1.2078172 | C330023M02Rik | 231713    | Mus musculus RIKEN cDNA C330023M02 gene (C330023M02Rik), mRNA.                                                                                                |
| 780338  | 0.04330814  | down | -1.2080712 | Mar-06        | 223455    | Mus musculus membrane-associated ring finger (C3HC4) 6 (March6), mRNA.                                                                                        |
| 1300528 | 0.020921338 | down | -1.208112  | Cno           | 117197    | Mus musculus cappuccino (Cno), mRNA.                                                                                                                          |
| 5560711 | 0.04330814  | down | -1.2081647 | Slc46a3       | 71706     | Mus musculus solute carrier family 46, member 3 (Slc46a3), mRNA.                                                                                              |
| 4060017 | 0.04330814  | down | -1.2082638 | Cdc73         | 214498    | Mus musculus cell division cycle 73, Paf1/RNA polymerase II complex component, homolog ( <i>S. cerevisiae</i> ) (Cdc73), mRNA.                                |
| 4120703 | 0.04330814  | down | -1.2087474 | Vcl           | 22330     | Mus musculus vinculin (Vcl), mRNA.                                                                                                                            |
| 3420546 | 0.020921338 | down | -1.209449  | Anapc11       | 66156     | Mus musculus anaphase promoting complex subunit 11 (Anapc11), transcript variant 1, mRNA.                                                                     |
| 5290754 | 0.020921338 | down | -1.2095883 | Crbn          | 58799     | Mus musculus cereblon (Crbn), transcript variant 1, mRNA.                                                                                                     |
| 6480037 | 0.020921338 | down | -1.2096283 | Rhot2         | 214952    | Mus musculus ras homolog gene family, member T2 (Rhot2), nuclear gene encoding mitochondrial protein, mRNA.                                                   |
| 7050538 | 0.04330814  | down | -1.2097064 | Ccl9          | 20308     | Mus musculus chemokine (C-C motif) ligand 9 (Ccl9), mRNA.                                                                                                     |
| 4060154 | 0.020921338 | down | -1.2097282 | Calu          | 12321     | Mus musculus calumenin (Calu), transcript variant 1, mRNA.                                                                                                    |
| 1070594 | 0.020921338 | down | -1.2099575 | Wdr37         | 207615    | Mus musculus WD repeat domain 37 (Wdr37), transcript variant 3, mRNA.                                                                                         |
| 7610730 | 0.020921338 | down | -1.2103204 | Dctn6         | 22428     | Mus musculus dynactin 6 (Dctn6), mRNA.                                                                                                                        |
| 3940639 | 0.04330814  | down | -1.2103832 | Glipr2        | 384009    | Mus musculus GLI pathogenesis-related 2 (Glipr2), mRNA.                                                                                                       |
| 540491  | 0.04330814  | down | -1.2105885 | Suz12         | 52615     | Mus musculus suppressor of zeste 12 homolog ( <i>Drosophila</i> ) (Suz12), mRNA.                                                                              |
| 3290753 | 0.020921338 | down | -1.2109406 | 5730494N06Rik | 70612     | Mus musculus RIKEN cDNA 5730494N06 gene (5730494N06Rik), mRNA.                                                                                                |
| 5420259 | 0.04330814  | down | -1.2111001 | Tfpt          | 69714     | Mus musculus TCF3 (E2A) fusion partner (Tfpt), mRNA.                                                                                                          |
| 5720156 | 0.020921338 | down | -1.211356  | Rnf12         | 19820     | Mus musculus ring finger protein 12 (Rnf12), mRNA.                                                                                                            |
| 1500066 | 0.04330814  | down | -1.2123516 | Evx1          | 14028     | Mus musculus even skipped homeotic gene 1 homolog (Evx1), mRNA.                                                                                               |
| 1780678 | 0.04330814  | down | -1.2129654 | Slc9a8        | 77031     | Mus musculus solute carrier family 9 (sodium/hydrogen exchanger), member 8 (Slc9a8), transcript variant 1, mRNA.                                              |
| 1400168 | 0.04330814  | down | -1.2131373 | LOC100046608  | 100046608 | PREDICTED: Mus musculus similar to Bcl2-like protein (LOC100046608), mRNA.                                                                                    |
| 3460070 | 0.04330814  | down | -1.2131523 | Riok1         | 71340     | Mus musculus RIO kinase 1 (yeast) (Riok1), mRNA.                                                                                                              |
| 6940053 | 0.04330814  | down | -1.2133216 | Pias2         | 17344     | Mus musculus protein inhibitor of activated STAT 2 (Pias2), mRNA. XM_990276 XM_990305 XM_990333                                                               |
| 1030440 | 0.020921338 | down | -1.2133799 | Rnf8          | 58230     | Mus musculus ring finger protein 8 (Rnf8), mRNA.                                                                                                              |
| 2650564 | 0.04330814  | down | -1.2140337 | Prmt6         | 99890     | Mus musculus protein arginine N-methyltransferase 6 (Prmt6), mRNA.                                                                                            |
| 3940504 | 0.020921338 | down | -1.214566  | 1810055E12Rik | 67894     | Mus musculus RIKEN cDNA 1810055E12 gene (1810055E12Rik), mRNA.                                                                                                |
| 4230452 | 0.020921338 | down | -1.2147393 | Glipr2        | 384009    | Mus musculus GLI pathogenesis-related 2 (Glipr2), mRNA.                                                                                                       |
| 1450463 | 0.020921338 | down | -1.2150277 | Rab28         | 100972    | Mus musculus RAB28, member RAS oncogene family (Rab28), mRNA.                                                                                                 |
| 7320240 | 0.020921338 | down | -1.2154444 | Kcnrg         | 328424    | Mus musculus potassium channel regulator (Kcnrg), transcript variant 2, mRNA.                                                                                 |

|         |             |      |            |               |        |                                                                                                                           |
|---------|-------------|------|------------|---------------|--------|---------------------------------------------------------------------------------------------------------------------------|
| 130154  | 0.020921338 | down | -1.21557   | Nudc          | 18221  | Mus musculus nuclear distribution gene C homolog ( <i>Aspergillus</i> ) ( <i>Nudc</i> ), mRNA.                            |
| 20477   | 0.020921338 | down | -1.2156843 | Tyw1          | 100929 | Mus musculus tRNA-yW synthesizing protein 1 homolog ( <i>S. cerevisiae</i> ) ( <i>Tyw1</i> ), transcript variant 1, mRNA. |
| 2030286 | 0.020921338 | down | -1.2157346 | Erlin2        | 244373 | Mus musculus ER lipid raft associated 2 ( <i>Erlin2</i> ), mRNA.                                                          |
| 4210288 | 0.04330814  | down | -1.2158409 | Stard4        | 170459 | Mus musculus StAR-related lipid transfer (START) domain containing 4 ( <i>Stard4</i> ), mRNA.                             |
| 2570086 | 0.04330814  | down | -1.2161783 | Clcnkb        | 56365  | Mus musculus chloride channel Kb ( <i>Clcnkb</i> ), mRNA.                                                                 |
| 4180301 | 0.04330814  | down | -1.2164444 | Mpdu1         | 24070  | Mus musculus mannose-P-dolichol utilization defect 1 ( <i>Mpdu1</i> ), mRNA.                                              |
| 3440411 | 0.04330814  | down | -1.2164916 | Them4         | 75778  | Mus musculus thioesterase superfamily member 4 ( <i>Them4</i> ), mRNA.                                                    |
| 1980392 | 0.02940105  | down | -1.2171068 | Galnt1        | 14423  | Mus musculus UDP-N-acetyl-alpha-D-galactosamine:polypeptide N-acetylgalactosaminyltransferase 1 ( <i>Galnt1</i> ), mRNA.  |
| 6580563 | 0.04330814  | down | -1.2171787 | Pex19         | 19298  | Mus musculus peroxisome biogenesis factor 19 ( <i>Pex19</i> ), mRNA.                                                      |
| 1690500 | 0.04330814  | down | -1.217495  | Zfp238        | 30928  | Mus musculus zinc finger protein 238 ( <i>Zfp238</i> ), transcript variant 2, mRNA.                                       |
| 6400253 | 0.04330814  | down | -1.2180507 | Cox18         | 231430 | Mus musculus COX18 cytochrome c oxidase assembly homolog ( <i>S. cerevisiae</i> ) ( <i>Cox18</i> ), mRNA.                 |
| 6620598 | 0.020921338 | down | -1.2183    | Ppm1a         | 19042  | Mus musculus protein phosphatase 1A, magnesium dependent, alpha isoform ( <i>Ppm1a</i> ), mRNA.                           |
| 2810221 | 0.020921338 | down | -1.2183582 | Cdk5rap1      | 66971  | Mus musculus CDK5 regulatory subunit associated protein 1 ( <i>Cdk5rap1</i> ), mRNA.                                      |
| 1440750 | 0.04330814  | down | -1.2185174 | Psm�4         | 19185  | Mus musculus proteasome (prosome, macropain) 26S subunit, non-ATPase, 4 ( <i>Psm�4</i> ), mRNA.                           |
| 6550743 | 0.020921338 | down | -1.2186527 | Arfgap2       | 77038  | Mus musculus ADP-ribosylation factor GTPase activating protein 2 ( <i>Arfgap2</i> ), mRNA.                                |
| 7100592 | 0.020921338 | down | -1.218743  | Crk           | 12928  | Mus musculus v-crk sarcoma virus CT10 oncogene homolog (avian) ( <i>Crk</i> ), mRNA.                                      |
| 6200692 | 0.020921338 | down | -1.2190446 | Id1           | 15901  | Mus musculus inhibitor of DNA binding 1 ( <i>Id1</i> ), mRNA.                                                             |
| 1240678 | 0.020921338 | down | -1.2195512 | Abcd4         | 19300  | Mus musculus ATP-binding cassette, sub-family D (ALD), member 4 ( <i>Abcd4</i> ), mRNA.                                   |
| 5420520 | 0.020921338 | down | -1.2200779 | Psm�8         | 57296  | Mus musculus proteasome (prosome, macropain) 26S subunit, non-ATPase, 8 ( <i>Psm�8</i> ), mRNA. XM_001002011              |
| 1300280 | 0.020921338 | down | -1.2205373 | Lass2         | 76893  | Mus musculus LAG1 homolog, ceramide synthase 2 ( <i>Lass2</i> ), mRNA.                                                    |
| 1510349 | 0.020921338 | down | -1.2209722 | Ch25h         | 12642  | Mus musculus cholesterol 25-hydroxylase ( <i>Ch25h</i> ), mRNA.                                                           |
| 6660392 | 0.020921338 | down | -1.2209982 | Prei3         |        |                                                                                                                           |
| 2060543 | 0.04330814  | down | -1.221008  | Cd79b         | 15985  | Mus musculus CD79B antigen ( <i>Cd79b</i> ), mRNA.                                                                        |
| 4540403 | 0.04330814  | down | -1.221072  | Il15ra        | 16169  | Mus musculus interleukin 15 receptor, alpha chain ( <i>Il15ra</i> ), transcript variant 2, mRNA.                          |
| 6520639 | 0.04330814  | down | -1.2211305 | Trim23        | 81003  | Mus musculus tripartite motif protein 23 ( <i>Trim23</i> ), mRNA.                                                         |
| 3170450 | 0.04330814  | down | -1.2224013 | Ireb2         | 64602  | Mus musculus iron responsive element binding protein 2 ( <i>Ireb2</i> ), mRNA.                                            |
| 4760682 | 0.020921338 | down | -1.222597  | Lrriq2        |        |                                                                                                                           |
| 2340743 | 0.04330814  | down | -1.2227215 | 2010321M09Rik | 69882  | Mus musculus RIKEN cDNA 2010321M09 gene (2010321M09Rik), transcript variant 2, mRNA.                                      |
| 4540050 | 0.020921338 | down | -1.223287  | Sfxn3         | 94280  | Mus musculus sideroflexin 3 ( <i>Sfxn3</i> ), mRNA.                                                                       |
| 50689   | 0.04330814  | down | -1.2235062 | Bcl7b         | 12054  | Mus musculus B-cell CLL/lymphoma 7B ( <i>Bcl7b</i> ), mRNA.                                                               |
| 290358  | 0.04330814  | down | -1.2242199 | Gcnt1         | 14537  | Mus musculus glucosaminyl (N-acetyl) transferase 1, core 2 ( <i>Gcnt1</i> ), mRNA.                                        |
| 3940286 | 0.04330814  | down | -1.2242353 | Adam23        | 23792  | Mus musculus a disintegrin and metallopeptidase domain 23 ( <i>Adam23</i> ), mRNA.                                        |
| 1450682 | 0.04330814  | down | -1.2243387 | Galnt1        | 14423  | Mus musculus UDP-N-acetyl-alpha-D-galactosamine:polypeptide N-acetylgalactosaminyltransferase 1 ( <i>Galnt1</i> ), mRNA.  |
| 6370553 | 0.04330814  | down | -1.2244036 | Lat2          | 56743  | Mus musculus linker for activation of T cells family, member 2 ( <i>Lat2</i> ), transcript variant 2, mRNA.               |
| 3310731 | 0.04330814  | down | -1.2246644 | Minpp1        | 17330  | Mus musculus multiple inositol polyphosphate histidine phosphatase 1 ( <i>Minpp1</i> ), mRNA.                             |
| 6110343 | 0.04330814  | down | -1.2247367 | Acin1         | 56215  | Mus musculus apoptotic chromatin condensation inducer 1 ( <i>Acin1</i> ), transcript variant 1, mRNA.                     |
| 2320253 | 0.04330814  | down | -1.2247653 | LOC329575     | 329575 | Mus musculus hypothetical LOC329575 (LOC329575), mRNA.                                                                    |
| 2340519 | 0.04330814  | down | -1.2247819 | Sep-06        | 56526  | Mus musculus septin 6 ( <i>Sept6</i> ), mRNA.                                                                             |
| 7550463 | 0.020921338 | down | -1.2251879 | Slc25a30      | 67554  | Mus musculus solute carrier family 25, member 30 ( <i>Slc25a30</i> ), mRNA.                                               |
| 4060605 | 0.020921338 | down | -1.2256297 | Senp7         | 66315  | Mus musculus SUMO1/sentrin specific peptidase 7 ( <i>Senp7</i> ), transcript variant 3, mRNA.                             |
| 6370114 | 0.020921338 | down | -1.225687  | Nup1          | 71844  | Mus musculus nucleoporin like 1 ( <i>Nup1</i> ), mRNA.                                                                    |
| 6130288 | 0.020921338 | down | -1.2261168 | Mcm4          | 17217  | Mus musculus minichromosome maintenance deficient 4 homolog ( <i>S. cerevisiae</i> ) ( <i>Mcm4</i> ), mRNA.               |
| 4060672 | 0.020921338 | down | -1.2264837 | Theg          | 21830  | Mus musculus testicular haploid expressed gene ( <i>Theg</i> ), transcript variant 2, mRNA.                               |
| 2490333 | 0.020921338 | down | -1.2266339 | Edem2         | 108687 | Mus musculus ER degradation enhancer, mannosidase alpha-like 2 ( <i>Edem2</i> ), mRNA.                                    |
| 3400609 | 0.04330814  | down | -1.2269238 | Lcmt1         | 30949  | Mus musculus leucine carboxyl methyltransferase 1 ( <i>Lcmt1</i> ), mRNA.                                                 |
| 6220403 | 0.020921338 | down | -1.2269802 | Fam110a       | 73847  | Mus musculus family with sequence similarity 110, member A ( <i>Fam110a</i> ), transcript variant 1, mRNA.                |
| 4540193 | 0.04330814  | down | -1.2280453 | Vkorc1l1      | 69568  | Mus musculus vitamin K epoxide reductase complex, subunit 1-like 1 ( <i>Vkorc1l1</i> ), transcript variant 1, mRNA.       |

|         |             |      |            |               |        |                                                                                                                                    |
|---------|-------------|------|------------|---------------|--------|------------------------------------------------------------------------------------------------------------------------------------|
| 4810041 | 0.020921338 | down | -1.2281199 | Eif4e3        | 66892  | Mus musculus eukaryotic translation initiation factor 4E member 3 (Eif4e3), mRNA.                                                  |
| 5490719 | 0.04330814  | down | -1.2282487 | Dcxr          | 67880  | Mus musculus dicarbonyl L-xylulose reductase (Dcxr), mRNA.                                                                         |
| 3180411 | 0.020921338 | down | -1.2283692 | Txndc9        | 98258  | Mus musculus thioredoxin domain containing 9 (Txndc9), mRNA.                                                                       |
| 3610192 | 0.020921338 | down | -1.2296594 | Calu          | 12321  | Mus musculus calumenin (Calu), transcript variant 1, mRNA.                                                                         |
| 1300327 | 0.04330814  | down | -1.230119  | Capzb         | 12345  | Mus musculus capping protein (actin filament) muscle Z-line, beta (Capzb), transcript variant 1, mRNA.                             |
| 610594  | 0.04330814  | down | -1.2301542 | Sesn3         | 75747  | Mus musculus sestrin 3 (Sesn3), mRNA.                                                                                              |
| 3420538 | 0.04330814  | down | -1.2304015 | Degs1         | 13244  | Mus musculus degenerative spermatocyte homolog 1 (Drosophila) (Degs1), mRNA.                                                       |
| 5260240 | 0.04330814  | down | -1.2305034 | Eif2s2        | 67204  | Mus musculus eukaryotic translation initiation factor 2, subunit 2 (beta) (Eif2s2), mRNA.                                          |
| 1450601 | 0.020921338 | down | -1.2312986 | Ndrp2         | 29811  | Mus musculus N-myc downstream regulated gene 2 (Ndrp2), mRNA.                                                                      |
| 990382  | 0.020921338 | down | -1.231417  | Zfp191        | 59057  | Mus musculus zinc finger protein 191 (Zfp191), mRNA.                                                                               |
| 5900543 | 0.020921338 | down | -1.2316844 | Acn9          | 71238  | Mus musculus ACN9 homolog (S. cerevisiae) (Acn9), mRNA.                                                                            |
| 4210300 | 0.04330814  | down | -1.2318512 | Leng9         | 243813 | Mus musculus leukocyte receptor cluster (LRC) member 9 (Leng9), mRNA.                                                              |
| 4060136 | 0.04330814  | down | -1.2322166 | Pmaip1        | 58801  | Mus musculus phorbol-12-myristate-13-acetate-induced protein 1 (Pmaip1), mRNA.                                                     |
| 1430470 | 0.020921338 | down | -1.2322245 | Dusp8         | 18218  | Mus musculus dual specificity phosphatase 8 (Dusp8), mRNA.                                                                         |
| 4850546 | 0.04330814  | down | -1.2325575 | Kat5          | 81601  | Mus musculus K(llysine) acetyltransferase 5 (Kat5), mRNA.                                                                          |
| 5570358 | 0.04330814  | down | -1.2330434 | Bcl2          | 12043  | Mus musculus B-cell leukemia/lymphoma 2 (Bcl2), transcript variant 2, mRNA.                                                        |
| 2810139 | 0.020921338 | down | -1.2330596 | Deadc1        | 66757  | Mus musculus deaminase domain containing 1 (Deadc1), mRNA.                                                                         |
| 3370246 | 0.020921338 | down | -1.2333308 | Tmem110       | 69179  | Mus musculus transmembrane protein 110 (Tmem110), mRNA.                                                                            |
| 2940433 | 0.020921338 | down | -1.2336516 | Il17ra        | 16172  | Mus musculus interleukin 17 receptor A (Il17ra), mRNA.                                                                             |
| 4590180 | 0.020921338 | down | -1.234233  | Zfp238        | 30928  | Mus musculus zinc finger protein 238 (Zfp238), transcript variant 2, mRNA.                                                         |
| 1410358 | 0.04330814  | down | -1.2343758 | Pop7          | 74097  | Mus musculus processing of precursor 7, ribonuclease P family, (S. cerevisiae) (Pop7), mRNA.                                       |
| 4490678 | 0.020921338 | down | -1.2354097 | Nme7          | 171567 | Mus musculus non-metastatic cells 7, protein expressed in (nucleoside-diphosphate kinase) (Nme7), transcript variant 1, mRNA.      |
| 1170156 | 0.020921338 | down | -1.2356246 | Nrg4          | 83961  | Mus musculus neuregulin 4 (Nrg4), mRNA.                                                                                            |
| 20201   | 0.020921338 | down | -1.2362736 | Akap7         | 432442 | Mus musculus A kinase (PRKA) anchor protein 7 (Akap7), mRNA.                                                                       |
| 3120470 | 0.020921338 | down | -1.2363337 | Cmc1          | 67899  | Mus musculus COX assembly mitochondrial protein homolog (S. cerevisiae) (Cmc1), nuclear gene encoding mitochondrial protein, mRNA. |
| 6560458 | 0.04330814  | down | -1.2363766 | 1110018J18Rik | 66129  | Mus musculus RIKEN cDNA 1110018J18 gene (1110018J18Rik), mRNA.                                                                     |
| 150730  | 0.04330814  | down | -1.2365732 | Ing4          | 28019  | Mus musculus inhibitor of growth family, member 4 (Ing4), mRNA.                                                                    |
| 7330019 | 0.020921338 | down | -1.236717  | Loh12cr1      | 67774  | Mus musculus loss of heterozygosity, 12, chromosomal region 1 homolog (human) (Loh12cr1), mRNA.                                    |
| 670113  | 0.04330814  | down | -1.2370657 | Hdh2          | 76987  | Mus musculus haloacid dehalogenase-like hydrolase domain containing 2 (Hdh2), transcript variant 1, mRNA.                          |
| 1570020 | 0.04330814  | down | -1.237479  | Vps29         | 56433  | Mus musculus vacuolar protein sorting 29 (S. pombe) (Vps29), mRNA.                                                                 |
| 2370193 | 0.020921338 | down | -1.2374976 | Apaf1         | 11783  | Mus musculus apoptotic peptidase activating factor 1 (Apaf1), transcript variant 1, mRNA.                                          |
| 5700017 | 0.020921338 | down | -1.2378144 | Itgae         | 16407  | Mus musculus integrin alpha E, epithelial-associated (Itgae), transcript variant 2, mRNA.                                          |
| 5340053 | 0.020921338 | down | -1.2382402 | Flt3l         | 14256  | Mus musculus FMS-like tyrosine kinase 3 ligand (Flt3l), mRNA.                                                                      |
| 6370541 | 0.04330814  | down | -1.2384796 | Kras          | 16653  | Mus musculus v-Ki-ras2 Kirsten rat sarcoma viral oncogene homolog (Kras), mRNA.                                                    |
| 2970324 | 0.04330814  | down | -1.2384868 | Hdc           | 15186  | Mus musculus histidine decarboxylase (Hdc), mRNA.                                                                                  |
| 7510431 | 0.020921338 | down | -1.2385843 | Agrp          | 11604  | Mus musculus agouti related protein (Agrp), mRNA.                                                                                  |
| 2810482 | 0.04330814  | down | -1.239421  | Tktl1         | 83553  | Mus musculus transketolase-like 1 (Tktl1), mRNA.                                                                                   |
| 7570647 | 0.020921338 | down | -1.2402995 | Nos3          | 18127  | Mus musculus nitric oxide synthase 3, endothelial cell (Nos3), mRNA.                                                               |
| 2680630 | 0.04330814  | down | -1.240314  | Mrpl18        | 67681  | Mus musculus mitochondrial ribosomal protein L18 (Mrpl18), nuclear gene encoding mitochondrial protein, mRNA.                      |
| 2750286 | 0.04330814  | down | -1.2403407 | Gnpda1        | 26384  | Mus musculus glucosamine-6-phosphate deaminase 1 (Gnpda1), mRNA.                                                                   |
| 2100671 | 0.020921338 | down | -1.2403824 | Klrb1f        | 232408 | Mus musculus killer cell lectin-like receptor subfamily B member 1F (Klrb1f), mRNA.                                                |
| 4780373 | 0.04330814  | down | -1.2405547 | Rnf4          | 19822  | Mus musculus ring finger protein 4 (Rnf4), mRNA.                                                                                   |
| 290019  | 0.020921338 | down | -1.2416162 | Rbm18         | 67889  | Mus musculus RNA binding motif protein 18 (Rbm18), mRNA.                                                                           |
| 6040292 | 0.020921338 | down | -1.2417423 | Tsc22d1       | 21807  | Mus musculus TSC22 domain family, member 1 (Tsc22d1), transcript variant 2, mRNA.                                                  |
| 2070612 | 0.020921338 | down | -1.2419182 | Jazf1         | 231986 | Mus musculus JAZF zinc finger 1 (Jazf1), mRNA.                                                                                     |
| 6450685 | 0.020921338 | down | -1.2419553 | Arid4b        | 94246  | Mus musculus AT rich interactive domain 4B (RBP1-like) (Arid4b), transcript variant 2, mRNA.                                       |
| 1690035 | 0.04330814  | down | -1.2422355 | Ramp2         | 54409  | Mus musculus receptor (calcitonin) activity modifying protein 2 (Ramp2), mRNA.                                                     |
| 4880411 | 0.020921338 | down | -1.2433335 | Gorasp2       | 70231  | Mus musculus golgi reassembly stacking protein 2 (Gorasp2), mRNA.                                                                  |
| 6040647 | 0.04330814  | down | -1.2436693 | Birc2         | 11797  | Mus musculus baculoviral IAP repeat-containing 2 (Birc2), mRNA.                                                                    |
| 150767  | 0.020921338 | down | -1.2443341 | Cdc37l1       | 67072  | Mus musculus cell division cycle 37 homolog (S. cerevisiae)-like 1 (Cdc37l1), mRNA.                                                |
| 4390347 | 0.020921338 | down | -1.2445402 | Tmed9         | 67511  | Mus musculus transmembrane emp24 protein transport domain containing 9 (Tmed9), mRNA.                                              |

|         |             |      |            |               |        |                                                                                                                                 |
|---------|-------------|------|------------|---------------|--------|---------------------------------------------------------------------------------------------------------------------------------|
| 610689  | 0.04330814  | down | -1.2452639 | Ccdc5         | 225745 | Mus musculus coiled-coil domain containing 5 (Ccdc5), mRNA.                                                                     |
| 5050138 | 0.04330814  | down | -1.2454598 | Klhdc9        | 68874  | Mus musculus kelch domain containing 9 (Klhdc9), mRNA.                                                                          |
| 7050671 | 0.020921338 | down | -1.2458231 | Mppe1         | 225651 | Mus musculus metallophosphoesterase 1 (Mppe1), mRNA. XM_001001219                                                               |
| 2510201 | 0.020921338 | down | -1.2462276 | Smarcd2       | 83796  | Mus musculus SWI/SNF related, matrix associated, actin dependent regulator of chromatin, subfamily d, member 2 (Smarcd2), mRNA. |
| 4830129 | 0.020921338 | down | -1.2468195 | Srebf2        | 20788  | Mus musculus sterol regulatory element binding factor 2 (Srebf2), mRNA.                                                         |
| 4150685 | 0.020921338 | down | -1.2470099 | Syncrip       | 56403  | Mus musculus synaptotagmin binding, cytoplasmic RNA interacting protein (Syncrip), transcript variant 1, mRNA.                  |
| 6100451 | 0.04330814  | down | -1.2479005 | Clcn3         | 12725  | Mus musculus chloride channel 3 (Clcn3), transcript variant a, mRNA.                                                            |
| 3460296 | 0.04330814  | down | -1.2480842 | Anxa2         | 12306  | Mus musculus annexin A2 (Anxa2), mRNA.                                                                                          |
| 2000497 | 0.04330814  | down | -1.2483764 | Elf2          | 69257  | Mus musculus E74-like factor 2 (Elf2), mRNA.                                                                                    |
| 4540626 | 0.020921338 | down | -1.2483963 | Tmem38b       | 52076  | Mus musculus transmembrane protein 38B (Tmem38b), mRNA.                                                                         |
| 4260477 | 0.020921338 | down | -1.2484101 | Rexo2         | 104444 | Mus musculus REX2, RNA exonuclease 2 homolog ( <i>S. cerevisiae</i> ) (Rexo2), mRNA.                                            |
| 830450  | 0.020921338 | down | -1.2486681 | Arl4a         | 11861  | Mus musculus ADP-ribosylation factor-like 4A (Arl4a), transcript variant 1, mRNA.                                               |
| 2450110 | 0.020921338 | down | -1.2492381 | 4833439L19Rik | 97820  | Mus musculus RIKEN cDNA 4833439L19 gene (4833439L19Rik), mRNA.                                                                  |
| 2000204 | 0.020921338 | down | -1.2498424 | Trem14        | 224840 | Mus musculus triggering receptor expressed on myeloid cells-like 4 (Trem14), transcript variant 2, mRNA.                        |
| 6550168 | 0.020921338 | down | -1.2498507 | Sec23ip       | 207352 | Mus musculus Sec23 interacting protein (Sec23ip), mRNA.                                                                         |
| 3840743 | 0.020921338 | down | -1.2498657 | Arfgap2       | 77038  | Mus musculus ADP-ribosylation factor GTPase activating protein 2 (Arfgap2), mRNA.                                               |
| 6370307 | 0.04330814  | down | -1.2499465 | Psmc5         | 19184  | Mus musculus protease (prosome, macropain) 26S subunit, ATPase 5 (Psmc5), mRNA.                                                 |
| 7330278 | 0.020921338 | down | -1.2504103 | Lgals1        |        |                                                                                                                                 |
| 4010091 | 0.020164572 | down | -1.2510446 | Snapin        | 20615  | Mus musculus SNAP-associated protein (Snapin), mRNA.                                                                            |
| 50500   | 0.04330814  | down | -1.2511241 | Prmt7         | 214572 | Mus musculus protein arginine N-methyltransferase 7 (Prmt7), mRNA.                                                              |
| 1470014 | 0.020921338 | down | -1.251206  | Acad8         | 66948  | Mus musculus acyl-Coenzyme A dehydrogenase family, member 8 (Acad8), mRNA.                                                      |
| 2340095 | 0.04330814  | down | -1.251521  | 9030221M09Rik |        |                                                                                                                                 |
| 3360132 | 0.020164572 | down | -1.2517432 | Syf2          | 68592  | Mus musculus SYF2 homolog, RNA splicing factor ( <i>S. cerevisiae</i> ) (Syf2), mRNA.                                           |
| 1190047 | 0.020921338 | down | -1.2520357 | Hist1h3e      | 319151 | Mus musculus histone cluster 1, H3e (Hist1h3e), mRNA.                                                                           |
| 2350630 | 0.020921338 | down | -1.2520925 | D3Ertd751e    | 73852  | Mus musculus DNA segment, Chr 3, ERATO Doi 751, expressed (D3Ertd751e), mRNA.                                                   |
| 1110301 | 0.04330814  | down | -1.2522393 | St3gal5       | 20454  | Mus musculus ST3 beta-galactoside alpha-2,3-sialyltransferase 5 (St3gal5), transcript variant 2, mRNA.                          |
| 6650142 | 0.020921338 | down | -1.252311  | Il15ra        | 16169  | Mus musculus interleukin 15 receptor, alpha chain (Il15ra), transcript variant 2, mRNA.                                         |
| 1030739 | 0.020921338 | down | -1.2523385 | Pecam1        | 18613  | Mus musculus platelet/endothelial cell adhesion molecule 1 (Pecam1), transcript variant 1, mRNA.                                |
| 1430170 | 0.020921338 | down | -1.2526152 | 2310001A20Rik | 71881  | Mus musculus RIKEN cDNA 2310001A20 gene (2310001A20Rik), mRNA.                                                                  |
| 3130661 | 0.020921338 | down | -1.2528018 | Fgfbp3        | 72514  | Mus musculus fibroblast growth factor binding protein 3 (Fgfbp3), mRNA.                                                         |
| 7100519 | 0.04330814  | down | -1.2540562 | Clk4          | 12750  | Mus musculus CDC like kinase 4 (Clk4), mRNA.                                                                                    |
| 7050026 | 0.04330814  | down | -1.2544929 | Eif4a3        | 192170 | Mus musculus eukaryotic translation initiation factor 4A, isoform 3 (Eif4a3), mRNA.                                             |
| 2970025 | 0.04330814  | down | -1.2551669 | Sesn1         | 140742 | Mus musculus sestrin 1 (Sesn1), mRNA.                                                                                           |
| 6450056 | 0.04330814  | down | -1.2562817 | Sqle          | 20775  | Mus musculus squalene epoxidase (Sqle), mRNA.                                                                                   |
| 6770681 | 0.020921338 | down | -1.2563112 | Med8          | 80509  | Mus musculus mediator of RNA polymerase II transcription, subunit 8 homolog (yeast) (Med8), transcript variant 1, mRNA.         |
| 5340474 | 0.020921338 | down | -1.2567778 | Evi2b         | 216984 | Mus musculus ecotropic viral integration site 2b (Evi2b), transcript variant 2, mRNA.                                           |
| 4890382 | 0.020921338 | down | -1.2568125 | Hist1h3d      | 319149 | Mus musculus histone cluster 1, H3d (Hist1h3d), mRNA.                                                                           |
| 6580113 | 0.020921338 | down | -1.2570223 | Enpp1         | 18605  | Mus musculus ectonucleotide pyrophosphatase/phosphodiesterase 1 (Enpp1), mRNA.                                                  |
| 6520154 | 0.04330814  | down | -1.2570466 | BC027231      | 212547 | Mus musculus cDNA sequence BC027231 (BC027231), mRNA.                                                                           |
| 6130598 | 0.020921338 | down | -1.2572746 | D3Ertd300e    | 56790  | Mus musculus DNA segment, Chr 3, ERATO Doi 300, expressed (D3Ertd300e), mRNA.                                                   |
| 5260739 | 0.04330814  | down | -1.2573258 | Ppp1r15b      |        |                                                                                                                                 |
| 7560113 | 0.04330814  | down | -1.2578524 | Imp4          | 27993  | Mus musculus IMP4, U3 small nucleolar ribonucleoprotein, homolog (yeast) (Imp4), mRNA.                                          |
| 3360544 | 0.04330814  | down | -1.2578591 | 2210012G02Rik | 66526  | Mus musculus RIKEN cDNA 2210012G02 gene (2210012G02Rik), mRNA.                                                                  |
| 1780278 | 0.020921338 | down | -1.2586578 | Zfp92         | 22754  | Mus musculus zinc finger protein 92 (Zfp92), mRNA.                                                                              |
| 3060082 | 0.04330814  | down | -1.2586796 | Psmd2         | 21762  | Mus musculus proteasome (prosome, macropain) 26S subunit, non-ATPase, 2 (Psmd2), mRNA.                                          |
| 1980072 | 0.020921338 | down | -1.258898  | Sec23a        | 20334  | Mus musculus SEC23A ( <i>S. cerevisiae</i> ) (Sec23a), mRNA.                                                                    |
| 2630021 | 0.020921338 | down | -1.2590995 | Efha1         | 68514  | Mus musculus EF hand domain family A1 (Efha1), mRNA.                                                                            |
| 460039  | 0.020921338 | down | -1.2592388 | F8a           | 14070  | Mus musculus factor 8-associated gene A (F8a), mRNA.                                                                            |
| 5820392 | 0.020921338 | down | -1.2596464 | Cfi1          | 12631  | Mus musculus cofilin 1, non-muscle (Cfi1), mRNA.                                                                                |
| 5810762 | 0.04330814  | down | -1.2599806 | Eif4e2        | 26987  | Mus musculus eukaryotic translation initiation factor 4E member 2 (Eif4e2), transcript variant 2, mRNA.                         |
| 870433  | 0.020921338 | down | -1.2604887 | Nt5c2         | 76952  | Mus musculus 5'-nucleotidase, cytosolic II (Nt5c2), mRNA.                                                                       |
| 5910309 | 0.020164572 | down | -1.2605816 | Rab10         | 19325  | Mus musculus RAB10, member RAS oncogene family (Rab10), mRNA.                                                                   |

|         |             |      |            |               |           |                                                                                                                                |
|---------|-------------|------|------------|---------------|-----------|--------------------------------------------------------------------------------------------------------------------------------|
| 1450138 | 0.020921338 | down | -1.2612728 | Ndufb7        | 66916     | Mus musculus NADH dehydrogenase (ubiquinone) 1 beta subcomplex, 7 (Ndufb7), nuclear gene encoding mitochondrial protein, mRNA. |
| 1580719 | 0.04330814  | down | -1.2613727 | Mapk1         | 26413     | Mus musculus mitogen-activated protein kinase 1 (Mapk1), transcript variant 1, mRNA.                                           |
| 160184  | 0.020921338 | down | -1.261431  | Pdzd11        | 72621     | Mus musculus PDZ domain containing 11 (Pdzd11), mRNA.                                                                          |
| 780243  | 0.020921338 | down | -1.2618501 | Cryz11        | 66609     | Mus musculus crystallin, zeta (quinone reductase)-like 1 (Cryz11), mRNA.                                                       |
| 4780671 | 0.020921338 | down | -1.2621552 | Tdg           | 21665     | Mus musculus thymine DNA glycosylase (Tdg), transcript variant 1, mRNA.                                                        |
| 6590139 | 0.020921338 | down | -1.2624888 | 170004717Rik1 | 73385     | Mus musculus RIKEN cDNA 170004717 gene 1 (170004717Rik1), mRNA.                                                                |
| 2850338 | 0.020921338 | down | -1.2625799 | Efha1         | 68514     | Mus musculus EF hand domain family A1 (Efha1), mRNA.                                                                           |
| 130670  | 0.04330814  | down | -1.2627943 | Stx18         | 71116     | Mus musculus syntaxin 18 (Stx18), mRNA.                                                                                        |
| 3400170 | 0.020921338 | down | -1.2629396 | Nup37         | 69736     | Mus musculus nucleoporin 37 (Nup37), mRNA.                                                                                     |
| 5900468 | 0.04330814  | down | -1.2632585 | Traf6         | 22034     | Mus musculus Tnf receptor-associated factor 6 (Traf6), mRNA.                                                                   |
| 430215  | 0.020921338 | down | -1.2635782 | Asah1         | 11886     | Mus musculus N-acylsphingosine amidohydrolase 1 (Asah1), mRNA.                                                                 |
| 5870064 | 0.04330814  | down | -1.2637595 | Usp38         | 74841     | Mus musculus ubiquitin specific peptidase 38 (Usp38), mRNA.                                                                    |
| 6180040 | 0.020921338 | down | -1.263897  | Ctsa          | 19025     | Mus musculus cathepsin A (Ctsa), transcript variant 1, mRNA.                                                                   |
| 4670431 | 0.020921338 | down | -1.2640077 | Usp46         | 69727     | Mus musculus ubiquitin specific peptidase 46 (Usp46), mRNA.                                                                    |
| 150315  | 0.04330814  | down | -1.2640667 | 2410127L17Rik | 67383     | Mus musculus RIKEN cDNA 2410127L17 gene (2410127L17Rik), mRNA.                                                                 |
| 620110  | 0.020921338 | down | -1.2642747 | Tfrc          | 22042     | Mus musculus transferrin receptor (Tfrc), mRNA.                                                                                |
| 1430035 | 0.04330814  | down | -1.2645216 | Ralgps1       | 241308    | Mus musculus Ral GEF with PH domain and SH3 binding motif 1 (Ralgps1), mRNA.                                                   |
| 730367  | 0.04330814  | down | -1.2650936 | 2410003P15Rik | 56046     | Mus musculus RIKEN cDNA 2410003P15 gene (2410003P15Rik), mRNA.                                                                 |
| 1450431 | 0.04330814  | down | -1.2652892 | Cdk10         | 234854    | Mus musculus cyclin-dependent kinase (CDC2-like) 10 (Cdk10), transcript variant 2, mRNA.                                       |
| 3870349 | 0.020921338 | down | -1.2655118 | Pex3          | 56535     | Mus musculus peroxisomal biogenesis factor 3 (Pex3), mRNA.                                                                     |
| 3420372 | 0.020921338 | down | -1.2658978 | Tgoln1        | 22134     | Mus musculus trans-golgi network protein (Tgoln1), mRNA.                                                                       |
| 5720278 | 0.020921338 | down | -1.2659358 | Vdac3         | 22335     | Mus musculus voltage-dependent anion channel 3 (Vdac3), mRNA.                                                                  |
| 6060278 | 0.020921338 | down | -1.2662067 | Dmtf1         | 23857     | Mus musculus cyclin D binding myb-like transcription factor 1 (Dmtf1), mRNA.                                                   |
| 2360064 | 0.04330814  | down | -1.2663888 | Pum2          | 80913     | Mus musculus pumilio 2 (Drosophila) (Pum2), mRNA. XM_919820 XM_919830 XM_919843 XM_919849                                      |
| 6860390 | 0.020921338 | down | -1.2670925 | Prnpip1       | 140546    | Mus musculus prion protein interacting protein 1 (Prnpip1), mRNA.                                                              |
| 1580445 | 0.020921338 | down | -1.267522  | Mycl1         | 16918     | Mus musculus v-myc myelocytomatosis viral oncogene homolog 1, lung carcinoma derived (avian) (Mycl1), mRNA.                    |
| 4730672 | 0.020921338 | down | -1.2677929 | Car5b         | 56078     | Mus musculus carbonic anhydrase 5b, mitochondrial (Car5b), nuclear gene encoding mitochondrial protein, mRNA.                  |
| 1090221 | 0.04330814  | down | -1.267982  | Lsm6          | 78651     | Mus musculus LSM6 homolog, U6 small nuclear RNA associated (S. cerevisiae) (Lsm6), mRNA. XM_990335                             |
| 6380711 | 0.020921338 | down | -1.2685899 | H3f3a         | 15078     | Mus musculus H3 histone, family 3A (H3f3a), mRNA.                                                                              |
| 380707  | 0.020921338 | down | -1.269228  | Zfp295        | 114565    | Mus musculus zinc finger protein 295 (Zfp295), transcript variant 3, mRNA.                                                     |
| 160519  | 0.020921338 | down | -1.2711165 | Tmem65        | 74868     | Mus musculus transmembrane protein 65 (Tmem65), mRNA.                                                                          |
| 4540373 | 0.04330814  | down | -1.2723109 | Umps          | 22247     | Mus musculus uridine monophosphate synthetase (Umps), mRNA.                                                                    |
| 7100484 | 0.020921338 | down | -1.2727491 | Glcci1        | 170772    | Mus musculus glucocorticoid induced transcript 1 (Glcci1), transcript variant 1, mRNA.                                         |
| 1440133 | 0.04330814  | down | -1.2728783 | BC020002      | 252875    | Mus musculus cDNA sequence BC020002 (BC020002), mRNA.                                                                          |
| 2850523 | 0.020921338 | down | -1.2729162 | Serf1         | 20365     | Mus musculus small EDRK-rich factor 1 (Serf1), mRNA.                                                                           |
| 3310487 | 0.020921338 | down | -1.2729465 | Dapp1         | 26377     | Mus musculus dual adaptor for phosphotyrosine and 3-phosphoinositides 1 (Dapp1), mRNA.                                         |
| 6420088 | 0.020921338 | down | -1.2733874 | 3110001A13Rik | 66540     | Mus musculus RIKEN cDNA 3110001A13 gene (3110001A13Rik), mRNA.                                                                 |
| 4040224 | 0.020921338 | down | -1.2735705 | Usp3          | 235441    | Mus musculus ubiquitin specific peptidase 3 (Usp3), mRNA.                                                                      |
| 5220333 | 0.020921338 | down | -1.2739749 | Lrba          | 80877     | Mus musculus LPS-responsive beige-like anchor (Lrba), transcript variant 3, mRNA.                                              |
| 580682  | 0.020921338 | down | -1.2745928 | Ifngr2        | 15980     | Mus musculus interferon gamma receptor 2 (Ifngr2), mRNA.                                                                       |
| 1300750 | 0.020921338 | down | -1.2752824 | Arl8b         | 67166     | Mus musculus ADP-ribosylation factor-like 8B (Arl8b), mRNA.                                                                    |
| 1710044 | 0.020921338 | down | -1.2760435 | Sfrs2         | 20382     | Mus musculus splicing factor, arginine/serine-rich 2 (SC-35) (Sfrs2), mRNA.                                                    |
| 840437  | 0.04330814  | down | -1.2760543 | As3mt         | 57344     | Mus musculus arsenic (+3 oxidation state) methyltransferase (As3mt), mRNA.                                                     |
| 3890398 | 0.04330814  | down | -1.2762195 | Rpl24         | 68193     | Mus musculus ribosomal protein L24 (Rpl24), mRNA.                                                                              |
| 1990333 | 0.04330814  | down | -1.2762212 | Hdhhd2        | 76987     | Mus musculus haloacid dehalogenase-like hydrolase domain containing 2 (Hdhhd2), transcript variant 3, mRNA.                    |
| 3450370 | 0.04330814  | down | -1.2764851 | Tuft1         | 22156     | Mus musculus tuftelin 1 (Tuft1), mRNA.                                                                                         |
| 780427  | 0.04330814  | down | -1.2773124 | Egln1         | 112405    | Mus musculus EGL nine homolog 1 (C. elegans) (Egln1), mRNA.                                                                    |
| 2810382 | 0.020921338 | down | -1.2777631 | Ap4m1         | 11781     | Mus musculus adaptor-related protein complex AP-4, mu 1 (Ap4m1), mRNA.                                                         |
| 6760088 | 0.04330814  | down | -1.2778772 | Ifngr2        | 15980     | Mus musculus interferon gamma receptor 2 (Ifngr2), mRNA.                                                                       |
| 4610193 | 0.020921338 | down | -1.2779108 | LOC100046393  | 100046393 | PREDICTED: Mus musculus similar to Protein phosphatase 2, regulatory subunit B (B56), alpha (LOC100046393), mRNA.              |
| 1090468 | 0.04330814  | down | -1.278106  | Gipc1         | 67903     | Mus musculus GIPC PDZ domain containing family, member 1 (Gipc1), mRNA.                                                        |
| 5260288 | 0.04330814  | down | -1.278181  | Rpl38         | 67671     | Mus musculus ribosomal protein L38 (Rpl38), transcript variant 1, mRNA.                                                        |
| 5860348 | 0.04330814  | down | -1.2784173 | Fah           | 14085     | Mus musculus fumarylacetoacetate hydrolase (Fah), mRNA.                                                                        |

|         |             |      |            |               |           |                                                                                                                                                              |
|---------|-------------|------|------------|---------------|-----------|--------------------------------------------------------------------------------------------------------------------------------------------------------------|
| 6450192 | 0.04330814  | down | -1.2793785 | BC011248      | 224823    | Mus musculus cDNA sequence BC011248 (BC011248), mRNA.                                                                                                        |
| 1230736 | 0.04330814  | down | -1.2796668 | 1810009A15Rik | 66276     | Mus musculus RIKEN cDNA 1810009A15 gene (1810009A15Rik), mRNA.                                                                                               |
| 4010082 | 0.020921338 | down | -1.2800142 | Ctgf          | 14219     | Mus musculus connective tissue growth factor (Ctgf), mRNA.                                                                                                   |
| 4480546 | 0.020921338 | down | -1.2803663 | Bzw2          | 66912     | Mus musculus basic leucine zipper and W2 domains 2 (Bzw2), mRNA.                                                                                             |
| 450431  | 0.04330814  | down | -1.2809187 | 1110049B09Rik | 68764     | Mus musculus RIKEN cDNA 1110049B09 gene (1110049B09Rik), mRNA.                                                                                               |
| 1820451 | 0.020921338 | down | -1.281005  | 1810030N24Rik | 66291     | Mus musculus RIKEN cDNA 1810030N24 gene (1810030N24Rik), mRNA.                                                                                               |
| 1300202 | 0.04330814  | down | -1.2815125 | Eprs          | 107508    | Mus musculus glutamyl-prolyl-tRNA synthetase (Eprs), mRNA.                                                                                                   |
| 3130390 | 0.020921338 | down | -1.2816155 | Zmpste24      | 230709    | Mus musculus zinc metallopeptidase, STE24 homolog ( <i>S. cerevisiae</i> ) (Zmpste24), mRNA.                                                                 |
| 6560576 | 0.04330814  | down | -1.2818505 | Slc25a11      | 67863     | Mus musculus solute carrier family 25 (mitochondrial carrier oxoglutarate carrier), member 11 (Slc25a11), nuclear gene encoding mitochondrial protein, mRNA. |
| 2190537 | 0.020921338 | down | -1.2818911 | Haghl         | 68977     | Mus musculus hydroxyacylglutathione hydrolase-like (Haghl), mRNA.                                                                                            |
| 620280  | 0.04330814  | down | -1.2821022 | Sgk3          | 170755    | Mus musculus serum/glucocorticoid regulated kinase 3 (Sgk3), transcript variant 2, mRNA.                                                                     |
| 1660079 | 0.04330814  | down | -1.2827502 | Matk          | 17179     | Mus musculus megakaryocyte-associated tyrosine kinase (Matk), mRNA.                                                                                          |
| 4540131 | 0.020921338 | down | -1.2829124 | Dhx15         | 13204     | Mus musculus DEAH (Asp-Glu-Ala-His) box polypeptide 15 (Dhx15), transcript variant 1, mRNA.                                                                  |
| 2340349 | 0.04330814  | down | -1.2838991 | Aldh2         | 11669     | Mus musculus aldehyde dehydrogenase 2, mitochondrial (Aldh2), nuclear gene encoding mitochondrial protein, mRNA.                                             |
| 6400017 | 0.04330814  | down | -1.2839504 | Hist1h2bc     | 68024     | Mus musculus histone cluster 1, H2bc (Hist1h2bc), mRNA.                                                                                                      |
| 5820672 | 0.020921338 | down | -1.2844294 | Tcp1          | 21454     | Mus musculus t-complex protein 1 (Tcp1), mRNA.                                                                                                               |
| 2350433 | 0.020921338 | down | -1.2847921 | Chfr          | 231600    | Mus musculus checkpoint with forkhead and ring finger domains (Chfr), mRNA.                                                                                  |
| 5220653 | 0.04330814  | down | -1.2853217 | Grap2         | 17444     | Mus musculus GRB2-related adaptor protein 2 (Grap2), mRNA.                                                                                                   |
| 1170554 | 0.020921338 | down | -1.2854981 | Prkx          | 19108     | Mus musculus protein kinase, X-linked (Prkx), mRNA.                                                                                                          |
| 1440019 | 0.04330814  | down | -1.2856225 | Cd59a         | 12509     | Mus musculus CD59a antigen (Cd59a), mRNA.                                                                                                                    |
| 1260605 | 0.04330814  | down | -1.2856698 | Hist1h2bn     | 319187    | Mus musculus histone cluster 1, H2bn (Hist1h2bn), mRNA.                                                                                                      |
| 2470753 | 0.04330814  | down | -1.2867054 | Amigo2        | 105827    | Mus musculus adhesion molecule with Ig like domain 2 (Amigo2), mRNA.                                                                                         |
| 5860358 | 0.04330814  | down | -1.2867377 | Vegfa         | 22339     | Mus musculus vascular endothelial growth factor A (Vegfa), transcript variant 2, mRNA.                                                                       |
| 5310446 | 0.020921338 | down | -1.2870826 | Trdmt1        | 13434     | Mus musculus tRNA aspartic acid methyltransferase 1 (Trdmt1), mRNA.                                                                                          |
| 2850148 | 0.04330814  | down | -1.2874435 | Arl5c         | 217151    | Mus musculus ADP-ribosylation factor-like 5C (Arl5c), mRNA.                                                                                                  |
| 2490019 | 0.04330814  | down | -1.2879493 | Gstt2         | 14872     | Mus musculus glutathione S-transferase, theta 2 (Gstt2), mRNA.                                                                                               |
| 460753  | 0.020921338 | down | -1.2888085 | Nus1          | 52014     | Mus musculus nuclear undecaprenyl pyrophosphate synthase 1 homolog ( <i>S. cerevisiae</i> ) (Nus1), mRNA.                                                    |
| 50681   | 0.020164572 | down | -1.2891948 | Bnip1         | 224630    | Mus musculus BCL2/adenovirus E1B interacting protein 1 (Bnip1), mRNA.                                                                                        |
| 5720482 | 0.020921338 | down | -1.2895366 | Lta           | 16992     | Mus musculus lymphotoxin A (Lta), mRNA.                                                                                                                      |
| 2100333 | 0.020921338 | down | -1.2902094 | Lrrc57        | 66606     | Mus musculus leucine rich repeat containing 57 (Lrrc57), mRNA.                                                                                               |
| 540156  | 0.020921338 | down | -1.2902974 | Chmp2a        | 68953     | Mus musculus chromatin modifying protein 2A (Chmp2a), mRNA.                                                                                                  |
| 6840671 | 0.020921338 | down | -1.2904235 | Pex7          | 18634     | Mus musculus peroxisome biogenesis factor 7 (Pex7), mRNA.                                                                                                    |
| 6620132 | 0.04330814  | down | -1.2908204 | Herpud2       | 80517     | Mus musculus HERPUD family member 2 (Herpud2), mRNA.                                                                                                         |
| 2900041 | 0.020921338 | down | -1.2910478 | Slc25a36      | 192287    | Mus musculus solute carrier family 25, member 36 (Slc25a36), mRNA.                                                                                           |
| 4290075 | 0.020921338 | down | -1.2911376 | Elf3          | 13710     | Mus musculus E74-like factor 3 (Elf3), mRNA.                                                                                                                 |
| 130369  | 0.020921338 | down | -1.2913193 | Nt5m          | 103850    | Mus musculus 5',3'-nucleotidase, mitochondrial (Nt5m), nuclear gene encoding mitochondrial protein, mRNA.                                                    |
| 1470647 | 0.04330814  | down | -1.2917738 | Pisd          | 320951    | Mus musculus phosphatidylserine decarboxylase (Pisd), mRNA.                                                                                                  |
| 7210288 | 0.04330814  | down | -1.2922342 | 4933424B01Rik | 71177     | Mus musculus RIKEN cDNA 4933424B01 gene (4933424B01Rik), mRNA.                                                                                               |
| 6650242 | 0.020921338 | down | -1.2925811 | Smu1          | 74255     | Mus musculus smu-1 suppressor of mec-8 and unc-52 homolog ( <i>C. elegans</i> ) (Smu1), mRNA.                                                                |
| 6520288 | 0.020921338 | down | -1.2937517 | Nqo2          | 18105     | Mus musculus NAD(P)H dehydrogenase, quinone 2 (Nqo2), mRNA.                                                                                                  |
| 5810482 | 0.020921338 | down | -1.2943717 | Amdhd2        | 245847    | Mus musculus amidohydrolase domain containing 2 (Amdhd2), mRNA.                                                                                              |
| 3390435 | 0.04330814  | down | -1.294729  | Slc35e1       | 270066    | Mus musculus solute carrier family 35, member E1 (Slc35e1), mRNA.                                                                                            |
| 4780673 | 0.020921338 | down | -1.2948956 | Slc30a1       | 22782     | Mus musculus solute carrier family 30 (zinc transporter), member 1 (Slc30a1), mRNA.                                                                          |
| 5390039 | 0.04330814  | down | -1.2954375 | Hrsp12        | 15473     | Mus musculus heat-responsive protein 12 (Hrsp12), mRNA.                                                                                                      |
| 870280  | 0.020921338 | down | -1.2956066 | Afmid         | 71562     | Mus musculus arylformamidase (Afmid), mRNA.                                                                                                                  |
| 5360148 | 0.04330814  | down | -1.2958375 | Mar-07        | 57438     | Mus musculus membrane-associated ring finger (C3HC4) 7 (March7), mRNA.                                                                                       |
| 3780747 | 0.020921338 | down | -1.2959088 | Slc28a2       | 269346    | Mus musculus solute carrier family 28 (sodium-coupled nucleoside transporter), member 2 (Slc28a2), mRNA.                                                     |
| 3870273 | 0.04330814  | down | -1.2970594 | Mobk1b        |           |                                                                                                                                                              |
| 5960475 | 0.020921338 | down | -1.2972267 | Klhl21        | 242785    | Mus musculus kelch-like 21 ( <i>Drosophila</i> ) (Klhl21), mRNA.                                                                                             |
| 3440270 | 0.020921338 | down | -1.2980002 | Slc3a2        | 17254     | Mus musculus solute carrier family 3 (activators of dibasic and neutral amino acid transport), member 2 (Slc3a2), mRNA.                                      |
| 3840376 | 0.04330814  | down | -1.2981012 | LOC100042179  | 100042179 | PREDICTED: Mus musculus similar to mitochondria-associated granulocyte macrophage CSF signaling molecule (LOC100042179), mRNA.                               |
| 2450601 | 0.04330814  | down | -1.2986555 | Rapgef4       | 56508     | Mus musculus Rap guanine nucleotide exchange factor (GEF) 4 (Rapgef4), mRNA.                                                                                 |
| 5550465 | 0.020921338 | down | -1.2994629 | Rasip1        | 69903     | Mus musculus Ras interacting protein 1 (Rasip1), mRNA.                                                                                                       |
| 3290332 | 0.020921338 | down | -1.299591  | LOC100047052  | 100047052 | PREDICTED: Mus musculus similar to Aptx protein (LOC100047052), mRNA.                                                                                        |



|         |             |      |            |               |           |                                                                                                                      |  |
|---------|-------------|------|------------|---------------|-----------|----------------------------------------------------------------------------------------------------------------------|--|
| 6110474 | 0.020921338 | down | -1.2997582 | 2510010F15Rik |           |                                                                                                                      |  |
| 4250372 | 0.04330814  | down | -1.2999959 | Ppp2r5c       | 26931     | Mus musculus protein phosphatase 2, regulatory subunit B (B56), gamma isoform (Ppp2r5c), transcript variant 3, mRNA. |  |
| 3140209 | 0.020921338 | down | -1.3004028 | Cxcl10        | 15945     | Mus musculus chemokine (C-X-C motif) ligand 10 (Cxcl10), mRNA.                                                       |  |
| 1010463 | 0.020921338 | down | -1.3006887 | Lyrm1         | 73919     | Mus musculus Lyr motif containing 1 (Lyrm1), mRNA.                                                                   |  |
| 6040427 | 0.042066425 | down | -1.3007869 | Lsm4          | 50783     | Mus musculus LSM4 homolog, U6 small nuclear RNA associated (S. cerevisiae) (Lsm4), mRNA.                             |  |
| 5220482 | 0.020921338 | down | -1.3016657 | Traf6         | 22034     | Mus musculus Tnf receptor-associated factor 6 (Traf6), mRNA.                                                         |  |
| 110747  | 0.020921338 | down | -1.3017122 | Vamp3         | 22319     | Mus musculus vesicle-associated membrane protein 3 (Vamp3), mRNA.                                                    |  |
| 7050221 | 0.020921338 | down | -1.3018755 | Cops4         | 26891     | Mus musculus COP9 (constitutive photomorphogenic) homolog, subunit 4 (Arabidopsis thaliana) (Cops4), mRNA.           |  |
| 1570239 | 0.020921338 | down | -1.3024144 | Elmo1         | 140580    | Mus musculus engulfment and cell motility 1, ced-12 homolog (C. elegans) (Elmo1), transcript variant 1, mRNA.        |  |
| 1990482 | 0.04330814  | down | -1.3026149 | LOC100044294  | 100044294 | PREDICTED: Mus musculus hypothetical protein LOC100044294 (LOC100044294), mRNA.                                      |  |
| 1470068 | 0.04330814  | down | -1.3026813 | Pstk          | 214580    | Mus musculus phosphoserine-tRNA kinase (Pstk), mRNA.                                                                 |  |
| 3890670 | 0.020921338 | down | -1.3027159 | Itgb1         | 16412     | Mus musculus integrin beta 1 (fibronectin receptor beta) (Itgb1), mRNA.                                              |  |
| 2340709 | 0.04330814  | down | -1.3027996 | Ndufc2        | 68197     | Mus musculus NADH dehydrogenase (ubiquinone) 1, subcomplex unknown, 2 (Ndufc2), mRNA.                                |  |
| 6960612 | 0.04330814  | down | -1.3030455 | Ube2i         | 22196     | Mus musculus ubiquitin-conjugating enzyme E2i (Ube2i), mRNA.                                                         |  |
| 1190504 | 0.020921338 | down | -1.3031569 | Ube2d3        | 66105     | Mus musculus ubiquitin-conjugating enzyme E2D 3 (UBC4/5 homolog, yeast) (Ube2d3), mRNA.                              |  |
| 6980129 | 0.020921338 | down | -1.3032886 | Nol5a         | 67134     | Mus musculus nucleolar protein 5A (Nol5a), mRNA.                                                                     |  |
| 2750719 | 0.020164572 | down | -1.3036137 | Smn1          | 20595     | Mus musculus survival motor neuron 1 (Smn1), mRNA.                                                                   |  |
| 20037   | 0.020921338 | down | -1.303903  | Arl6ip4       | 65105     | Mus musculus ADP-ribosylation factor-like 6 interacting protein 4 (Arl6ip4), mRNA.                                   |  |
| 7200187 | 0.020921338 | down | -1.303975  | LOC333331     | 333331    | PREDICTED: Mus musculus similar to medium-chain acyl-CoA dehydrogenase (LOC333331), misc RNA.                        |  |
| 7000603 | 0.020921338 | down | -1.3040918 | Tsyp11        | 22110     | Mus musculus testis-specific protein, Y-encoded-like 1 (Tsyp11), mRNA.                                               |  |
| 6840458 | 0.020921338 | down | -1.3041042 | Csde1         | 229663    | Mus musculus cold shock domain containing E1, RNA binding (Csde1), mRNA.                                             |  |
| 2510689 | 0.020921338 | down | -1.3045411 | Dhrs4         | 28200     | Mus musculus dehydrogenase/reductase (SDR family) member 4 (Dhrs4), transcript variant 1, mRNA.                      |  |
| 6020246 | 0.020921338 | down | -1.3045537 | Pim2          | 18715     | Mus musculus proviral integration site 2 (Pim2), transcript variant 1, mRNA.                                         |  |
| 5900025 | 0.020921338 | down | -1.3046693 | Rngtt         | 24018     | Mus musculus RNA guanylyltransferase and 5'-phosphatase (Rngtt), mRNA.                                               |  |
| 1450433 | 0.020921338 | down | -1.3046769 | Fbxo8         | 50753     | Mus musculus F-box protein 8 (Fbxo8), mRNA.                                                                          |  |
| 3190474 | 0.020921338 | down | -1.3065363 | Dpysl2        |           |                                                                                                                      |  |
| 3450170 | 0.04330814  | down | -1.3082807 | Ccdc28b       | 66264     | Mus musculus coiled coil domain containing 28B (Ccdc28b), mRNA.                                                      |  |
| 5690402 | 0.020921338 | down | -1.3084073 | Vapb          | 56491     | Mus musculus vesicle-associated membrane protein, associated protein B and C (Vapb), mRNA.                           |  |
| 1030703 | 0.04330814  | down | -1.3084127 | Sar1a         | 20224     | Mus musculus SAR1 gene homolog A (S. cerevisiae) (Sar1a), mRNA.                                                      |  |
| 4200703 | 0.020921338 | down | -1.3093073 | Dph3          | 105638    | Mus musculus DPH3 homolog (KTI11, S. cerevisiae) (Dph3), transcript variant 2, mRNA.                                 |  |
| 4200129 | 0.020921338 | down | -1.3093642 | Commd8        | 27784     | Mus musculus COMM domain containing 8 (Commd8), mRNA.                                                                |  |
| 3370349 | 0.04330814  | down | -1.3096347 | Rp23-297j14.5 | 100041400 | Mus musculus similar to oxidative stress responsive 1 (Rp23-297j14.5), mRNA.                                         |  |
| 540753  | 0.020921338 | down | -1.3099173 | Trib2         |           |                                                                                                                      |  |
| 6840164 | 0.020921338 | down | -1.310191  | Bpnt1         | 23827     | Mus musculus bisphosphate 3'-nucleotidase 1 (Bpnt1), mRNA.                                                           |  |
| 5560072 | 0.020921338 | down | -1.3105422 | Lcmt1         | 30949     | Mus musculus leucine carboxyl methyltransferase 1 (Lcmt1), mRNA.                                                     |  |
| 4260333 | 0.04330814  | down | -1.3106822 | Ndfip1        | 65113     | Mus musculus Nedd4 family interacting protein 1 (Ndfip1), mRNA.                                                      |  |
| 840255  | 0.04330814  | down | -1.3121973 | Mrps10        | 64657     | Mus musculus mitochondrial ribosomal protein S10 (Mrps10), nuclear gene encoding mitochondrial protein, mRNA.        |  |
| 1740577 | 0.020921338 | down | -1.3125826 | Snx14         | 244962    | Mus musculus sorting nexin 14 (Snx14), mRNA.                                                                         |  |
| 6020037 | 0.020921338 | down | -1.3126539 | Man1a         | 17155     | Mus musculus mannosidase 1, alpha (Man1a), mRNA.                                                                     |  |
| 580554  | 0.020921338 | down | -1.3126608 | Sf1           | 22668     | Mus musculus splicing factor 1 (Sf1), mRNA. XM_979946 XM_979979                                                      |  |
| 1580209 | 0.020921338 | down | -1.3127047 | C130032J12Rik | 218975    | Mus musculus RIKEN cDNA C130032J12 gene (C130032J12Rik), mRNA.                                                       |  |
| 6960563 | 0.04330814  | down | -1.313032  | BC085271      | 434632    | Mus musculus cDNA sequence BC085271 (BC085271), mRNA.                                                                |  |
| 1230347 | 0.020164572 | down | -1.3134279 | Fadd          | 14082     | Mus musculus Fas (TNFRSF6)-associated via death domain (Fadd), mRNA.                                                 |  |
| 3610253 | 0.042066425 | down | -1.3139662 | Cluap1        | 76779     | Mus musculus clusterin associated protein 1 (Cluap1), mRNA.                                                          |  |
| 4290044 | 0.020921338 | down | -1.314127  | Papd4         | 100715    | Mus musculus PAP associated domain containing 4 (Papd4), mRNA.                                                       |  |
| 6650672 | 0.020921338 | down | -1.3145171 | Pole3         | 59001     | Mus musculus polymerase (DNA directed), epsilon 3 (p17 subunit) (Pole3), mRNA.                                       |  |
| 2060072 | 0.04330814  | down | -1.3145568 | Sra1          | 24068     | Mus musculus steroid receptor RNA activator 1 (Sra1), mRNA.                                                          |  |
| 2120280 | 0.020921338 | down | -1.3145695 | Hnrph1        |           |                                                                                                                      |  |
| 4200347 | 0.020921338 | down | -1.314674  | Gosr2         | 56494     | Mus musculus golgi SNAP receptor complex member 2 (Gosr2), mRNA.                                                     |  |
| 610671  | 0.020921338 | down | -1.3147311 | Ampd1         | 229665    | Mus musculus adenosine monophosphate deaminase 1 (isoform M) (Ampd1), mRNA. XM_921992                                |  |
| 4050524 | 0.020921338 | down | -1.3162414 | Rnf138        | 56515     | Mus musculus ring finger protein 138 (Rnf138), transcript variant 2, mRNA.                                           |  |
| 4920291 | 0.04330814  | down | -1.3162831 | Mrpl48        | 52443     | Mus musculus mitochondrial ribosomal protein L48 (Mrpl48), nuclear gene encoding mitochondrial protein, mRNA.        |  |
| 2230070 | 0.020921338 | down | -1.3172789 | Tmem108       | 81907     | Mus musculus transmembrane protein 108 (Tmem108), mRNA.                                                              |  |

|         |             |      |            |               |           |                                                                                                                                                                     |
|---------|-------------|------|------------|---------------|-----------|---------------------------------------------------------------------------------------------------------------------------------------------------------------------|
| 1980672 | 0.020921338 | down | -1.3175217 | P2ry10        | 78826     | Mus musculus purinergic receptor P2Y, G-protein coupled 10 (P2ry10), mRNA.                                                                                          |
| 3400259 | 0.04330814  | down | -1.3178103 | Dusp4         | 319520    | Mus musculus dual specificity phosphatase 4 (Dusp4), mRNA.                                                                                                          |
| 6020487 | 0.04330814  | down | -1.3188789 | LOC100044439  | 100044439 | PREDICTED: Mus musculus similar to cytochrome P450 CYP4F18 (LOC100044439), mRNA.                                                                                    |
| 520608  | 0.04330814  | down | -1.319652  | Ctsa          | 19025     | Mus musculus cathepsin A (Ctsa), transcript variant 2, mRNA.                                                                                                        |
| 1710309 | 0.020921338 | down | -1.3200803 | Ufsp2         | 192169    | Mus musculus UFM1-specific peptidase 2 (Ufsp2), mRNA.                                                                                                               |
| 1990639 | 0.04330814  | down | -1.3202716 | Apaf1         | 11783     | Mus musculus apoptotic peptidase activating factor 1 (Apaf1), transcript variant 1, mRNA.                                                                           |
| 4880091 | 0.020921338 | down | -1.3218774 | Ddb2          | 107986    | Mus musculus damage specific DNA binding protein 2 (Ddb2), mRNA.                                                                                                    |
| 990593  | 0.020921338 | down | -1.3219941 | Galnt1        | 14423     | Mus musculus UDP-N-acetyl-alpha-D-galactosamine:polypeptide N-acetylgalactosaminyltransferase 1 (Galnt1), mRNA.                                                     |
| 5310343 | 0.020921338 | down | -1.3219955 | Insig1        | 231070    | Mus musculus insulin induced gene 1 (Insig1), mRNA.                                                                                                                 |
| 1980632 | 0.020921338 | down | -1.3222826 | Ube2s         |           |                                                                                                                                                                     |
| 5290121 | 0.020921338 | down | -1.3224746 | Cnot7         | 18983     | Mus musculus CCR4-NOT transcription complex, subunit 7 (Cnot7), mRNA.                                                                                               |
| 3610424 | 0.020921338 | down | -1.3234192 | Bcap31        | 27061     | Mus musculus B-cell receptor-associated protein 31 (Bcap31), mRNA.                                                                                                  |
| 3190193 | 0.04330814  | down | -1.323563  | Hddc2         | 69692     | Mus musculus HD domain containing 2 (Hddc2), mRNA.                                                                                                                  |
| 4640092 | 0.020921338 | down | -1.3238559 | Denr          | 68184     | Mus musculus density-regulated protein (Denr), mRNA.                                                                                                                |
| 5570068 | 0.020921338 | down | -1.3239379 | Atp6ap2       | 70495     | Mus musculus ATPase, H <sup>+</sup> transporting, lysosomal accessory protein 2 (Atp6ap2), mRNA.                                                                    |
| 6110577 | 0.04330814  | down | -1.3240345 | 1110003E01Rik | 68552     | Mus musculus RIKEN cDNA 1110003E01 gene (1110003E01Rik), mRNA.                                                                                                      |
| 5870184 | 0.020921338 | down | -1.3255014 | Rab6          | 19346     | Mus musculus RAB6, member RAS oncogene family (Rab6), mRNA.                                                                                                         |
| 20722   | 0.020921338 | down | -1.325776  | Pdcl          | 67466     | Mus musculus phosducin-like (Pdcl), mRNA.                                                                                                                           |
| 2480719 | 0.04330814  | down | -1.3264731 | Flot1         | 14251     | Mus musculus flotillin 1 (Flot1), mRNA.                                                                                                                             |
| 1340326 | 0.04330814  | down | -1.3270471 | Rala          | 56044     | Mus musculus v-ral simian leukemia viral oncogene homolog A (ras related) (Rala), mRNA.                                                                             |
| 290110  | 0.04330814  | down | -1.3270586 | Pfkp          | 56421     | Mus musculus phosphofructokinase, platelet (Pfkp), mRNA.                                                                                                            |
| 1400685 | 0.020921338 | down | -1.3281046 | BC008163      | 230789    | Mus musculus cDNA sequence BC008163 (BC008163), mRNA.                                                                                                               |
| 5050711 | 0.04330814  | down | -1.3282025 | 2900073G15Rik |           |                                                                                                                                                                     |
| 1070482 | 0.04330814  | down | -1.328297  | Mrpl48        | 52443     | Mus musculus mitochondrial ribosomal protein L48 (Mrpl48), transcript variant 1, mRNA.                                                                              |
| 6110348 | 0.020921338 | down | -1.3283951 | Ttc19         | 72795     | Mus musculus tetratricopeptide repeat domain 19 (Ttc19), transcript variant 2, mRNA.                                                                                |
| 5960343 | 0.020921338 | down | -1.3286953 | H1f0          | 14958     | Mus musculus H1 histone family, member 0 (H1f0), mRNA.                                                                                                              |
| 3800274 | 0.04330814  | down | -1.3298752 | Skil          | 20482     | Mus musculus SKI-like (Skil), transcript variant 2, mRNA.                                                                                                           |
| 2230563 | 0.020921338 | down | -1.3298802 | Polr3k        | 67005     | Mus musculus polymerase (RNA) III (DNA directed) polypeptide K (Polr3k), mRNA.                                                                                      |
| 2680521 | 0.020921338 | down | -1.3301582 | Cnot2         | 72068     | Mus musculus CCR4-NOT transcription complex, subunit 2 (Cnot2), transcript variant 1, mRNA.                                                                         |
| 5260397 | 0.020921338 | down | -1.3307694 | Gpbp11        | 77110     | Mus musculus GC-rich promoter binding protein 1-like 1 (Gpbp11), mRNA.                                                                                              |
| 4060682 | 0.020921338 | down | -1.3311813 | Crry          |           |                                                                                                                                                                     |
| 60390   | 0.020921338 | down | -1.3312075 | Gsdmcd1       | 69146     | Mus musculus gasdermin domain containing 1 (Gsdmcd1), mRNA.                                                                                                         |
| 450253  | 0.04330814  | down | -1.3312783 | Mrpl9         | 78523     | Mus musculus mitochondrial ribosomal protein L9 (Mrpl9), nuclear gene encoding mitochondrial protein, mRNA.                                                         |
| 1770577 | 0.020921338 | down | -1.3313211 | Mtmt14        | 97287     | Mus musculus myotubularin related protein 14 (Mtmt14), mRNA.                                                                                                        |
| 4200100 | 0.04330814  | down | -1.3321707 | Dusp1         | 19252     | Mus musculus dual specificity phosphatase 1 (Dusp1), mRNA.                                                                                                          |
| 5420142 | 0.020921338 | down | -1.3323947 | Churc1        | 211151    | Mus musculus churchill domain containing 1 (Churc1), mRNA. XM_989232                                                                                                |
| 1770242 | 0.020921338 | down | -1.3324028 | Zfand2b       | 68818     | Mus musculus zinc finger, AN1 type domain 2B (Zfand2b), mRNA.                                                                                                       |
| 5090523 | 0.020921338 | down | -1.3324366 | Ino80c        | 225280    | Mus musculus INO80 complex subunit C (Ino80c), mRNA.                                                                                                                |
| 5960243 | 0.020921338 | down | -1.3324691 | Tank          | 21353     | Mus musculus TRAF family member-associated NF-kappa B activator (Tank), mRNA.                                                                                       |
| 3310243 | 0.020921338 | down | -1.3331927 | Mdm2          | 17246     | Mus musculus transformed mouse 3T3 cell double minute 2 (Mdm2), mRNA.                                                                                               |
| 780184  | 0.04330814  | down | -1.3333982 | Synj2bp       | 24071     | Mus musculus synaptojanin 2 binding protein (Synj2bp), mRNA.                                                                                                        |
| 6130577 | 0.04330814  | down | -1.334373  | 1110038F14Rik | 117171    | Mus musculus RIKEN cDNA 1110038F14 gene (1110038F14Rik), mRNA.                                                                                                      |
| 3190242 | 0.04330814  | down | -1.3347287 | Slc25a16      | 73132     | Mus musculus solute carrier family 25 (mitochondrial carrier, Graves disease autoantigen), member 16 (Slc25a16), nuclear gene encoding mitochondrial protein, mRNA. |
| 6280630 | 0.020921338 | down | -1.3349699 | 2410018C17Rik | 74504     | Mus musculus RIKEN cDNA 2410018C17 gene (2410018C17Rik), mRNA.                                                                                                      |
| 1190092 | 0.020921338 | down | -1.3349754 | Ate1          | 11907     | Mus musculus arginyltransferase 1 (Ate1), transcript variant 3, mRNA.                                                                                               |
| 430240  | 0.020921338 | down | -1.3353816 | 2010305A19Rik | 69893     | Mus musculus RIKEN cDNA 2010305A19 gene (2010305A19Rik), mRNA.                                                                                                      |
| 1010050 | 0.020921338 | down | -1.3355032 | Lmo4          | 16911     | Mus musculus LIM domain only 4 (Lmo4), mRNA.                                                                                                                        |
| 1660253 | 0.020921338 | down | -1.3361437 | Ifrd1         | 15982     | Mus musculus interferon-related developmental regulator 1 (Ifrd1), mRNA.                                                                                            |
| 1050072 | 0.020921338 | down | -1.3363516 | Lmna          | 16905     | Mus musculus lamin A (Lmna), transcript variant 2, mRNA.                                                                                                            |
| 1090440 | 0.020921338 | down | -1.337126  | Xrn2          | 24128     | Mus musculus 5'-3' exoribonuclease 2 (Xrn2), mRNA.                                                                                                                  |
| 5420451 | 0.04330814  | down | -1.3378235 | Hist1h2bh     | 319182    | Mus musculus histone cluster 1, H2bh (Hist1h2bh), mRNA.                                                                                                             |
| 2370129 | 0.04330814  | down | -1.3378953 | Donson        | 60364     | Mus musculus downstream neighbor of SON (Donson), mRNA.                                                                                                             |
| 450600  | 0.04330814  | down | -1.3380173 | Fam109a       | 231717    | Mus musculus family with sequence similarity 109, member A (Fam109a), mRNA.                                                                                         |
| 670195  | 0.020921338 | down | -1.3381424 | LOC667609     | 667609    | PREDICTED: Mus musculus similar to mitochondrial ribosomal protein S5 (LOC667609), misc RNA.                                                                        |

|         |             |      |            |               |        |                                                                                                                                                                |
|---------|-------------|------|------------|---------------|--------|----------------------------------------------------------------------------------------------------------------------------------------------------------------|
| 6840634 | 0.020921338 | down | -1.3381574 | Cib2          | 56506  | Mus musculus calcium and integrin binding family member 2 (Cib2), mRNA.                                                                                        |
| 650168  | 0.020921338 | down | -1.3385386 | Ivns1abp      | 117198 | Mus musculus influenza virus NS1A binding protein (Ivns1abp), transcript variant 1, mRNA.                                                                      |
| 5810068 | 0.04330814  | down | -1.3388553 | Cops7b        | 26895  | Mus musculus COP9 (constitutive photomorphogenic) homolog, subunit 7b (Arabidopsis thaliana) (Cops7b), mRNA.                                                   |
| 6520356 | 0.020921338 | down | -1.3391066 | Igf2bp3       | 140488 | Mus musculus insulin-like growth factor 2 mRNA binding protein 3 (Igf2bp3), mRNA.                                                                              |
| 1780524 | 0.020164572 | down | -1.3392237 | Tfrc          | 22042  | Mus musculus transferrin receptor (Tfrc), mRNA.                                                                                                                |
| 4920487 | 0.04330814  | down | -1.3397408 | Ckb           | 12709  | Mus musculus creatine kinase, brain (Ckb), mRNA.                                                                                                               |
| 2140743 | 0.04330814  | down | -1.3409972 | Wdr70         | 545085 | PREDICTED: Mus musculus WD repeat domain 70, transcript variant 3 (Wdr70), mRNA.                                                                               |
| 5130253 | 0.04330814  | down | -1.3412598 | Rab1          | 19324  | Mus musculus RAB1, member RAS oncogene family (Rab1), mRNA.                                                                                                    |
| 460349  | 0.020921338 | down | -1.3413575 | Coq6          | 217707 | Mus musculus coenzyme Q6 homolog (yeast) (Coq6), mRNA.                                                                                                         |
| 540088  | 0.020921338 | down | -1.3426851 | Sp140         | 434484 | Mus musculus Sp140 nuclear body protein (Sp140), mRNA.                                                                                                         |
| 5690021 | 0.020921338 | down | -1.3427033 | Capn1         | 12333  | Mus musculus calpain 1 (Capn1), mRNA.                                                                                                                          |
| 1580435 | 0.04330814  | down | -1.3427415 | Psm10         | 53380  | Mus musculus proteasome (prosome, macropain) 26S subunit, non-ATPase, 10 (Psm10), mRNA.                                                                        |
| 2120195 | 0.04330814  | down | -1.3430277 | St5           | 76954  | Mus musculus suppression of tumorigenicity 5 (St5), transcript variant 2, mRNA.                                                                                |
| 6270131 | 0.020921338 | down | -1.343365  | Pqlc1         | 66943  | Mus musculus PQ loop repeat containing 1 (Pqlc1), mRNA.                                                                                                        |
| 3390546 | 0.020921338 | down | -1.3438562 | Hnrnp1        | 59013  | Mus musculus heterogeneous nuclear ribonucleoprotein H1 (Hnrnp1), mRNA.                                                                                        |
| 7380706 | 0.020921338 | down | -1.3439658 | Tubb2b        | 73710  | Mus musculus tubulin, beta 2b (Tubb2b), mRNA.                                                                                                                  |
| 4150259 | 0.020164572 | down | -1.3441259 | 4930403C10Rik | 73813  | Mus musculus RIKEN cDNA 4930403C10 gene (4930403C10Rik), mRNA.                                                                                                 |
| 5900433 | 0.020921338 | down | -1.3444446 | Ccnd3         | 12445  | Mus musculus cyclin D3 (Ccnd3), transcript variant 3, mRNA.                                                                                                    |
| 1340360 | 0.020921338 | down | -1.3445997 | Dedd          | 21945  | Mus musculus death effector domain-containing (Dedd), mRNA.                                                                                                    |
| 540553  | 0.04330814  | down | -1.3448496 | Ttc5          | 219022 | Mus musculus tetratricopeptide repeat domain 5 (Ttc5), transcript variant 1, mRNA.                                                                             |
| 2340598 | 0.04330814  | down | -1.3451402 | 2310039H08Rik | 67101  | Mus musculus RIKEN cDNA 2310039H08 gene (2310039H08Rik), mRNA.                                                                                                 |
| 1410278 | 0.020921338 | down | -1.3455144 | Mrps31        | 57312  | Mus musculus mitochondrial ribosomal protein S31 (Mrps31), nuclear gene encoding mitochondrial protein, mRNA.                                                  |
| 2600278 | 0.020921338 | down | -1.3456676 | Cutc          | 66388  | Mus musculus cutC copper transporter homolog (E.coli) (Cutc), mRNA.                                                                                            |
| 3800228 | 0.020921338 | down | -1.3462328 | Tmem23        |        |                                                                                                                                                                |
| 1570725 | 0.020921338 | down | -1.3466223 | Dscr1l2       | 53902  | Mus musculus Down syndrome critical region gene 1-like 2 (Dscr1l2), mRNA.                                                                                      |
| 5420368 | 0.020921338 | down | -1.3467374 | Bmi1          | 12151  | Mus musculus Bmi1 polycomb ring finger oncogene (Bmi1), mRNA.                                                                                                  |
| 6660343 | 0.04330814  | down | -1.34748   | 1700040I03Rik | 73327  | Mus musculus RIKEN cDNA 1700040I03 gene (1700040I03Rik), mRNA.<br>XM_923066 XM_978905 XM_981332 XM_981367 XM_981402 XM_990015 XM_991725                        |
| 4590470 | 0.020921338 | down | -1.3475951 | Ppp3cc        | 19057  | Mus musculus protein phosphatase 3, catalytic subunit, gamma isoform (Ppp3cc), mRNA.                                                                           |
| 3460477 | 0.020921338 | down | -1.3476508 | 2010106G01Rik | 66552  | Mus musculus RIKEN cDNA 2010106G01 gene (2010106G01Rik), mRNA.                                                                                                 |
| 2510390 | 0.020921338 | down | -1.3477693 | ldh2          | 269951 | Mus musculus isocitrate dehydrogenase 2 (NADP+), mitochondrial (ldh2), nuclear gene encoding mitochondrial protein, mRNA.                                      |
| 3190653 | 0.020921338 | down | -1.3477814 | Syt11         | 229521 | Mus musculus synaptotagmin XI (Syt11), mRNA.                                                                                                                   |
| 5220142 | 0.020921338 | down | -1.3480746 | D3Ucla1       | 28146  | Mus musculus DNA segment, Chr 3, University of California at Los Angeles 1 (D3Ucla1), mRNA.                                                                    |
| 5270743 | 0.020921338 | down | -1.3483698 | Kctd12        | 239217 | Mus musculus potassium channel tetramerisation domain containing 12 (Kctd12), mRNA.                                                                            |
| 130039  | 0.020921338 | down | -1.3504649 | Emd           | 13726  | Mus musculus emerlin (Emd), mRNA.                                                                                                                              |
| 7570315 | 0.020921338 | down | -1.3506451 | Agpat4        | 68262  | Mus musculus 1-acylglycerol-3-phosphate O-acyltransferase 4 (lysophosphatidic acid acyltransferase, delta) (Agpat4), mRNA.                                     |
| 4120689 | 0.020921338 | down | -1.3506684 | Edem1         | 192193 | Mus musculus ER degradation enhancer, mannosidase alpha-like 1 (Edem1), mRNA.                                                                                  |
| 2940543 | 0.020921338 | down | -1.3506798 | Cdk10         | 234854 | Mus musculus cyclin-dependent kinase (CDC2-like) 10 (Cdk10), transcript variant 2, mRNA.                                                                       |
| 2070564 | 0.020921338 | down | -1.3508326 | 0610037L13Rik | 74098  | Mus musculus RIKEN cDNA 0610037L13 gene (0610037L13Rik), mRNA.                                                                                                 |
| 6280070 | 0.020921338 | down | -1.3523809 | Gtf2f2        | 68705  | Mus musculus general transcription factor IIF, polypeptide 2 (Gtf2f2), mRNA.                                                                                   |
| 6420209 | 0.020921338 | down | -1.3524375 | Capn3         | 12335  | Mus musculus calpain 3 (Capn3), mRNA.                                                                                                                          |
| 3890300 | 0.04330814  | down | -1.3526534 | Rab7          | 19349  | Mus musculus RAB7, member RAS oncogene family (Rab7), mRNA.                                                                                                    |
| 1090279 | 0.020921338 | down | -1.3531528 | Rab6          | 19346  | Mus musculus RAB6, member RAS oncogene family (Rab6), mRNA.                                                                                                    |
| 70196   | 0.04330814  | down | -1.3531963 | Dpp8          | 74388  | Mus musculus dipeptidylpeptidase 8 (Dpp8), mRNA.                                                                                                               |
| 270187  | 0.020921338 | down | -1.3552572 | Nqo2          | 18105  | Mus musculus NAD(P)H dehydrogenase, quinone 2 (Nqo2), mRNA.                                                                                                    |
| 4670474 | 0.04330814  | down | -1.3554788 | Vamp8         | 22320  | Mus musculus vesicle-associated membrane protein 8 (Vamp8), mRNA.                                                                                              |
| 5820356 | 0.04330814  | down | -1.355673  | Slc25a19      | 67283  | Mus musculus solute carrier family 25 (mitochondrial thiamine pyrophosphate carrier), member 19 (Slc25a19), nuclear gene encoding mitochondrial protein, mRNA. |
| 6180445 | 0.04330814  | down | -1.3561137 | Hrsp12        | 15473  | Mus musculus heat-responsive protein 12 (Hrsp12), mRNA.                                                                                                        |
| 3120427 | 0.020921338 | down | -1.3562461 | Slc16a6       | 104681 | Mus musculus solute carrier family 16 (monocarboxylic acid transporters), member 6 (Slc16a6), transcript variant 2, mRNA.                                      |
| 1050253 | 0.020921338 | down | -1.356782  | Ppp2r3c       | 59032  | Mus musculus protein phosphatase 2, regulatory subunit B', gamma (Ppp2r3c), mRNA.                                                                              |
| 6040634 | 0.04330814  | down | -1.3567835 | Hist1h2bj     | 319183 | Mus musculus histone cluster 1, H2bj (Hist1h2bj), mRNA.                                                                                                        |

|         |             |      |            |               |        |                                                                                                                       |
|---------|-------------|------|------------|---------------|--------|-----------------------------------------------------------------------------------------------------------------------|
| 5050228 | 0.020921338 | down | -1.357143  | Pitpna        | 18738  | Mus musculus phosphatidylinositol transfer protein, alpha (Pitpna), mRNA.                                             |
| 2490598 | 0.020921338 | down | -1.3572022 | Ier3ip1       | 66191  | Mus musculus immediate early response 3 interacting protein 1 (Ier3ip1), mRNA.                                        |
| 3390066 | 0.04330814  | down | -1.3573047 | Mtch1         | 56462  | Mus musculus mitochondrial carrier homolog 1 (C. elegans) (Mtch1), nuclear gene encoding mitochondrial protein, mRNA. |
| 4610468 | 0.020921338 | down | -1.357354  | Cyb5r4        | 266690 | Mus musculus cytochrome b5 reductase 4 (Cyb5r4), mRNA.                                                                |
| 7650639 | 0.04330814  | down | -1.3578057 | 4833439L19Rik | 97820  | Mus musculus RIKEN cDNA 4833439L19 gene (4833439L19Rik), mRNA.                                                        |
| 7330739 | 0.020921338 | down | -1.3578366 | Hist2h3c1     | 15077  | Mus musculus histone cluster 2, H3c1 (Hist2h3c1), transcript variant 1, mRNA.                                         |
| 1440746 | 0.04330814  | down | -1.3583211 | Asl           |        |                                                                                                                       |
| 3400181 | 0.020921338 | down | -1.360145  | Snrp70        | 20637  | Mus musculus U1 small nuclear ribonucleoprotein polypeptide A (Snrp70), mRNA.                                         |
| 3390605 | 0.04330814  | down | -1.3602499 | Cyhr1         | 54151  | Mus musculus cysteine and histidine rich 1 (Cyhr1), transcript variant 2, mRNA.                                       |
| 6900377 | 0.020921338 | down | -1.3604927 | Yme1l1        | 27377  | Mus musculus YME1-like 1 (S. cerevisiae) (Yme1l1), nuclear gene encoding mitochondrial protein, mRNA.                 |
| 6560053 | 0.020921338 | down | -1.3607992 | Aatf          | 56321  | Mus musculus apoptosis antagonizing transcription factor (Aatf), mRNA.                                                |
| 4260754 | 0.020921338 | down | -1.3614688 | Mtx1          | 17827  | Mus musculus metaxin 1 (Mtx1), mRNA.                                                                                  |
| 580484  | 0.04330814  | down | -1.3616776 | Uros          | 22276  | Mus musculus uroporphyrinogen III synthase (Uros), mRNA.                                                              |
| 610440  | 0.04330814  | down | -1.3620665 | Atp6v1c1      | 66335  | Mus musculus ATPase, H+ transporting, lysosomal V1 subunit C1 (Atp6v1c1), mRNA.                                       |
| 3360475 | 0.020921338 | down | -1.3622646 | 1110057K04Rik | 68832  | Mus musculus RIKEN cDNA 1110057K04 gene (1110057K04Rik), mRNA.                                                        |
| 2070040 | 0.020921338 | down | -1.3622843 | Cep57         | 74360  | Mus musculus centrosomal protein 57 (Cep57), mRNA.                                                                    |
| 6940014 | 0.020921338 | down | -1.3623495 | Tmem147       | 69804  | Mus musculus transmembrane protein 147 (Tmem147), mRNA.                                                               |
| 1340706 | 0.020921338 | down | -1.3626271 | Gnl3l         | 237107 | Mus musculus guanine nucleotide binding protein-like 3 (nucleolar)-like (Gnl3l), mRNA.                                |
| 5550019 | 0.04330814  | down | -1.3634101 | Rps6          | 20104  | Mus musculus ribosomal protein S6 (Rps6), mRNA.                                                                       |
| 3870593 | 0.020921338 | down | -1.3639104 | Gpr108        | 78308  | Mus musculus G protein-coupled receptor 108 (Gpr108), mRNA.                                                           |
| 5960333 | 0.020921338 | down | -1.3639235 | Ube2f         | 67921  | Mus musculus ubiquitin-conjugating enzyme E2F (putative) (Ube2f), mRNA.                                               |
| 6110292 | 0.04330814  | down | -1.3640207 | Nt5c3l        | 68106  | Mus musculus 5'-nucleotidase, cytosolic III-like (Nt5c3l), mRNA.                                                      |
| 3390156 | 0.04330814  | down | -1.3640953 | Dscr3         | 13185  | Mus musculus Down syndrome critical region gene 3 (Dscr3), mRNA.                                                      |
| 650561  | 0.04330814  | down | -1.3645793 | Tubb2b        | 73710  | Mus musculus tubulin, beta 2b (Tubb2b), mRNA.                                                                         |
| 1230577 | 0.04330814  | down | -1.3651484 | lpmk          | 69718  | Mus musculus inositol polyphosphate multikinase (lpmk), mRNA.                                                         |
| 3170131 | 0.04330814  | down | -1.3653905 | 2810410P22Rik |        |                                                                                                                       |
| 6370739 | 0.020921338 | down | -1.3659724 | Cybasc3       | 225912 | Mus musculus cytochrome b, ascorbate dependent 3 (Cybasc3), mRNA.                                                     |
| 1470132 | 0.020921338 | down | -1.3664659 | Fbxl5         | 242960 | Mus musculus F-box and leucine-rich repeat protein 5 (Fbxl5), mRNA.                                                   |
| 2680577 | 0.020921338 | down | -1.3667412 | M6pr          |        |                                                                                                                       |
| 4880056 | 0.020921338 | down | -1.3684881 | Rapsn         | 19400  | Mus musculus receptor-associated protein of the synapse (Rapsn), mRNA.                                                |
| 2850494 | 0.04330814  | down | -1.3686932 | Snx12         | 55988  | Mus musculus sorting nexin 12 (Snx12), mRNA.                                                                          |
| 4220239 | 0.020921338 | down | -1.3689682 | Coq10b        | 67876  | Mus musculus coenzyme Q10 homolog B (S. cerevisiae) (Coq10b), transcript variant 1, mRNA.                             |
| 3060440 | 0.020921338 | down | -1.3691045 | Surf1         | 20930  | Mus musculus surfet gene 1 (Surf1), mRNA.                                                                             |
| 4260017 | 0.04330814  | down | -1.3691074 | Rpl7a         | 27176  | Mus musculus ribosomal protein L7a (Rpl7a), mRNA.                                                                     |
| 4830768 | 0.020921338 | down | -1.3698963 | Amd2          | 11703  | Mus musculus S-adenosylmethionine decarboxylase 2 (Amd2), mRNA.                                                       |
| 870048  | 0.020921338 | down | -1.3704948 | Yrdc          | 230734 | Mus musculus yrdC domain containing (E.coli) (Yrdc), mRNA.                                                            |
| 6860347 | 0.04330814  | down | -1.370814  | Hist1h4f      | 319157 | Mus musculus histone cluster 1, H4f (Hist1h4f), mRNA.                                                                 |
| 5290577 | 0.04330814  | down | -1.371183  | Rps27a        | 78294  | Mus musculus ribosomal protein S27a (Rps27a), transcript variant 2, mRNA.                                             |
| 7150356 | 0.020921338 | down | -1.3714947 | Hist2h2aa1    |        |                                                                                                                       |
| 1510433 | 0.04330814  | down | -1.3717334 | Ino80c        | 225280 | Mus musculus INO80 complex subunit C (Ino80c), mRNA.                                                                  |
| 2760093 | 0.04330814  | down | -1.3719358 | H13           | 14950  | Mus musculus histocompatibility 13 (H13), mRNA.                                                                       |
| 610202  | 0.020921338 | down | -1.3723018 | Ppp1cb        | 19046  | Mus musculus protein phosphatase 1, catalytic subunit, beta isoform (Ppp1cb), mRNA.                                   |
| 4920553 | 0.020921338 | down | -1.3726394 | Sgk3          | 170755 | Mus musculus serum/glucocorticoid regulated kinase 3 (Sgk3), transcript variant 2, mRNA.                              |
| 780242  | 0.020921338 | down | -1.3728276 | Eif4e2        | 26987  | Mus musculus eukaryotic translation initiation factor 4E member 2 (Eif4e2), transcript variant 3, mRNA.               |
| 3120079 | 0.04330814  | down | -1.3728764 | Alg12         | 223774 | Mus musculus asparagine-linked glycosylation 12 homolog (yeast, alpha-1,6-mannosyltransferase) (Alg12), mRNA.         |
| 1050300 | 0.020921338 | down | -1.3731871 | Rgs2          |        |                                                                                                                       |
| 2470392 | 0.020921338 | down | -1.3733492 | Rel           | 19696  | Mus musculus reticuloendotheliosis oncogene (Rel), mRNA.                                                              |
| 7560538 | 0.04330814  | down | -1.3736529 | Slc14a1       | 108052 | Mus musculus solute carrier family 14 (urea transporter), member 1 (Slc14a1), mRNA.                                   |
| 2940209 | 0.020921338 | down | -1.3736819 | Ube2e3        | 22193  | Mus musculus ubiquitin-conjugating enzyme E2E 3, UBC4/5 homolog (yeast) (Ube2e3), mRNA.                               |
| 1240279 | 0.020921338 | down | -1.374191  | Tm2d2         | 69742  | Mus musculus TM2 domain containing 2 (Tm2d2), mRNA.                                                                   |
| 7610411 | 0.04330814  | down | -1.3743246 | Frag1         | 233575 | Mus musculus FGF receptor activating protein 1 (Frag1), mRNA.                                                         |
| 5050753 | 0.04330814  | down | -1.3746636 | Il20rb        | 213208 | Mus musculus interleukin 20 receptor beta (Il20rb), transcript variant 2, mRNA. XM_906440 XM_919838 XM_919854         |
| 2810088 | 0.04330814  | down | -1.3751667 | D15Mgi27      | 106073 | Mus musculus DNA Segment, Chr 15, Mouse Genome Informatics 27 (D15Mgi27), mRNA.                                       |

|         |             |      |            |               |           |                                                                                                                             |
|---------|-------------|------|------------|---------------|-----------|-----------------------------------------------------------------------------------------------------------------------------|
| 6270601 | 0.020921338 | down | -1.3756797 | Slc35a3       | 229782    | Mus musculus solute carrier family 35 (UDP-N-acetylglucosamine (UDP-GlcNAc) transporter), member 3 (Slc35a3), mRNA.         |
| 1780367 | 0.04330814  | down | -1.376727  | Traf6         | 22034     | Mus musculus Tnf receptor-associated factor 6 (Traf6), mRNA.                                                                |
| 4590326 | 0.04330814  | down | -1.3769257 | Tssc1         | 380752    | Mus musculus tumor suppressing subtransferable candidate 1 (Tssc1), mRNA.                                                   |
| 4070300 | 0.04330814  | down | -1.3773432 | Tmem134       | 66990     | Mus musculus transmembrane protein 134 (Tmem134), transcript variant 1, mRNA.                                               |
| 1990546 | 0.04330814  | down | -1.378376  | Faim3         | 69169     | Mus musculus Fas apoptotic inhibitory molecule 3 (Faim3), mRNA.                                                             |
| 3390021 | 0.020921338 | down | -1.3789438 | Sdcbp         | 53378     | Mus musculus syndecan binding protein (Sdcbp), transcript variant 1, mRNA.                                                  |
| 2810328 | 0.020921338 | down | -1.3794624 | 2210009G21Rik | 74243     | Mus musculus RIKEN cDNA 2210009G21 gene (2210009G21Rik), transcript variant 3, mRNA.                                        |
| 2970196 | 0.04330814  | down | -1.3797444 | Tmed4         | 103694    | Mus musculus transmembrane emp24 protein transport domain containing 4 (Tmed4), mRNA.                                       |
| 2900474 | 0.020921338 | down | -1.3806214 | Lta           | 16992     | Mus musculus lymphotoxin A (Lta), mRNA.                                                                                     |
| 5050220 | 0.020921338 | down | -1.3808774 | Tnfrsf26      | 244237    | Mus musculus tumor necrosis factor receptor superfamily, member 26 (Tnfrsf26), mRNA.                                        |
| 1430139 | 0.04330814  | down | -1.3814871 | Asl           |           |                                                                                                                             |
| 4540468 | 0.020921338 | down | -1.3820163 | Ywhae         | 22627     | Mus musculus tyrosine 3-monooxygenase/tryptophan 5-monooxygenase activation protein, epsilon polypeptide (Ywhae), mRNA.     |
| 150709  | 0.020921338 | down | -1.3824145 | Ak2           | 11637     | Mus musculus adenylate kinase 2 (Ak2), transcript variant 2, mRNA.                                                          |
| 1190088 | 0.04330814  | down | -1.3835793 | Irf1          | 16362     | Mus musculus interferon regulatory factor 1 (Irf1), mRNA.                                                                   |
| 1580411 | 0.020921338 | down | -1.3837138 | Epc1          | 13831     | Mus musculus enhancer of polycomb homolog 1 (Drosophila) (Epc1), transcript variant 2, mRNA.                                |
| 6520133 | 0.020921338 | down | -1.3843402 | Irf9          | 16391     | Mus musculus interferon regulatory factor 9 (Irf9), mRNA.                                                                   |
| 6660240 | 0.04330814  | down | -1.3847785 | Tkt           | 21881     | Mus musculus transketolase (Tkt), mRNA.                                                                                     |
| 1240646 | 0.04330814  | down | -1.3848509 | Ccr5          | 12774     | Mus musculus chemokine (C-C motif) receptor 5 (Ccr5), mRNA.                                                                 |
| 4830477 | 0.020921338 | down | -1.385329  | Arl5a         | 75423     | Mus musculus ADP-ribosylation factor-like 5A (Arl5a), mRNA.                                                                 |
| 6420324 | 0.020921338 | down | -1.3857781 | Idh3g         | 15929     | Mus musculus isocitrate dehydrogenase 3 (NAD+), gamma (Idh3g), nuclear gene encoding mitochondrial protein, mRNA.           |
| 4210653 | 0.04330814  | down | -1.3863071 | Pdzd11        | 72621     | Mus musculus PDZ domain containing 11 (Pdzd11), mRNA.                                                                       |
| 7510670 | 0.020921338 | down | -1.3868731 | Commd10       | 69456     | Mus musculus COMM domain containing 10 (Commd10), mRNA.                                                                     |
| 20358   | 0.04330814  | down | -1.3876045 | Tapbp         |           |                                                                                                                             |
| 4810468 | 0.020921338 | down | -1.3877577 | Flot2         | 14252     | Mus musculus flotillin 2 (Flot2), transcript variant 2, mRNA.                                                               |
| 2710541 | 0.020921338 | down | -1.3884326 | Rcl1          | 59028     | Mus musculus RNA terminal phosphate cyclase-like 1 (Rcl1), mRNA.                                                            |
| 4390022 | 0.04330814  | down | -1.3894517 | Lrrc28        | 67867     | Mus musculus leucine rich repeat containing 28 (Lrrc28), mRNA.                                                              |
| 1410730 | 0.04330814  | down | -1.3897305 | 9430023L20Rik | 68118     | Mus musculus RIKEN cDNA 9430023L20 gene (9430023L20Rik), mRNA.                                                              |
| 7210326 | 0.020921338 | down | -1.3899546 | Slc16a6       | 104681    | Mus musculus solute carrier family 16 (monocarboxylic acid transporters), member 6 (Slc16a6), transcript variant 2, mRNA.   |
| 5260278 | 0.020921338 | down | -1.3901063 | Ets1          |           |                                                                                                                             |
| 3890538 | 0.020921338 | down | -1.391145  | Arl2bp        | 107566    | Mus musculus ADP-ribosylation factor-like 2 binding protein (Arl2bp), transcript variant 1, mRNA.                           |
| 1090438 | 0.04330814  | down | -1.3919559 | Atf3          | 11910     | Mus musculus activating transcription factor 3 (Atf3), mRNA.                                                                |
| 1170484 | 0.020921338 | down | -1.3920066 | Cry           |           |                                                                                                                             |
| 4810228 | 0.04330814  | down | -1.3923172 | Fam20a        | 208659    | Mus musculus family with sequence similarity 20, member A (Fam20a), mRNA.                                                   |
| 1570288 | 0.020921338 | down | -1.3926508 | Dapl1         | 76747     | Mus musculus death associated protein-like 1 (Dapl1), mRNA.                                                                 |
| 6940494 | 0.020921338 | down | -1.3938407 | 2810410P22Rik |           |                                                                                                                             |
| 5080193 | 0.020921338 | down | -1.3941455 | 9130011J15Rik | 66818     | Mus musculus RIKEN cDNA 9130011J15 gene (9130011J15Rik), mRNA.<br>XM_919242                                                 |
| 6450050 | 0.020921338 | down | -1.3942327 | Fadd          | 14082     | Mus musculus Fas (TNFRSF6)-associated via death domain (Fadd), mRNA.                                                        |
| 3360445 | 0.020921338 | down | -1.3948878 | M6prbp1       | 66905     | Mus musculus mannose-6-phosphate receptor binding protein 1 (M6prbp1), mRNA.                                                |
| 3140102 | 0.020921338 | down | -1.3953043 | Paox          | 212503    | Mus musculus polyamine oxidase (exo-N4-amino) (Paox), mRNA.                                                                 |
| 2030315 | 0.04330814  | down | -1.3955106 | Mrps34        | 79044     | Mus musculus mitochondrial ribosomal protein S34 (Mrps34), nuclear gene encoding mitochondrial protein, mRNA.               |
| 240546  | 0.020921338 | down | -1.3956399 | LOC100045439  | 100045439 | PREDICTED: Mus musculus similar to testis-specific adriamycin sensitivity protein (LOC100045439), mRNA.                     |
| 150148  | 0.04330814  | down | -1.3961133 | Hist1h2bf     | 319180    | Mus musculus histone cluster 1, H2bf (Hist1h2bf), mRNA.                                                                     |
| 270754  | 0.020921338 | down | -1.3983265 | Pnpo          | 103711    | Mus musculus pyridoxine 5'-phosphate oxidase (Pnpo), mRNA.                                                                  |
| 5870133 | 0.020921338 | down | -1.3986521 | 2610204K14Rik | 67148     | Mus musculus RIKEN cDNA 2610204K14 gene (2610204K14Rik), mRNA.                                                              |
| 6900491 | 0.04330814  | down | -1.3986646 | Klh9          | 242521    | Mus musculus kelch-like 9 (Drosophila) (Klh9), mRNA.                                                                        |
| 4880376 | 0.04330814  | down | -1.3994042 | 2410091C18Rik | 73694     | Mus musculus RIKEN cDNA 2410091C18 gene (2410091C18Rik), transcript variant 1, mRNA.                                        |
| 3170433 | 0.020921338 | down | -1.4000397 | Stap1         | 56792     | Mus musculus signal transducing adaptor family member 1 (Stap1), mRNA.                                                      |
| 7160343 | 0.04330814  | down | -1.4000847 | Gnas          | 14683     | Mus musculus GNAS (guanine nucleotide binding protein, alpha stimulating) complex locus (Gnas), transcript variant 8, mRNA. |
| 770014  | 0.04330814  | down | -1.4005737 | Atp6v0d1      | 11972     | Mus musculus ATPase, H+ transporting, lysosomal V0 subunit D1 (Atp6v0d1), mRNA.                                             |
| 7320139 | 0.020921338 | down | -1.4007313 | ift80         | 68259     | Mus musculus intraflagellar transport 80 homolog (Chlamydomonas) (ift80), mRNA.                                             |
| 5860064 | 0.020921338 | down | -1.4011916 | Zc3hc1        | 232679    | Mus musculus zinc finger, C3HC type 1 (Zc3hc1), mRNA.                                                                       |

|         |             |      |            |               |           |                                                                                                                                                               |
|---------|-------------|------|------------|---------------|-----------|---------------------------------------------------------------------------------------------------------------------------------------------------------------|
| 1510091 | 0.04330814  | down | -1.401738  | Pla2g12a      | 66350     | Mus musculus phospholipase A2, group XIIA (Pla2g12a), transcript variant 1, mRNA.                                                                             |
| 3450364 | 0.020921338 | down | -1.4040875 | Plekhf2       | 71801     | Mus musculus pleckstrin homology domain containing, family F (with FYVE domain) member 2 (Plekhf2), mRNA.                                                     |
| 6520220 | 0.04330814  | down | -1.4047989 | Csnk1d        | 104318    | Mus musculus casein kinase 1, delta (Csnk1d), transcript variant 2, mRNA.                                                                                     |
| 240338  | 0.04330814  | down | -1.4053774 | Psm5          | 66998     | Mus musculus proteasome (prosome, macropain) 26S subunit, non-ATPase, 5 (Psm5), mRNA.                                                                         |
| 5490142 | 0.020921338 | down | -1.4058056 | Ica1          | 15893     | Mus musculus islet cell autoantigen 1 (Ica1), mRNA.                                                                                                           |
| 5130367 | 0.020921338 | down | -1.4059775 | Pmaip1        | 58801     | Mus musculus phorbol-12-myristate-13-acetate-induced protein 1 (Pmaip1), mRNA.                                                                                |
| 3440187 | 0.020921338 | down | -1.4062334 | Pdhb          | 68263     | Mus musculus pyruvate dehydrogenase (lipoamide) beta (Pdhb), mRNA.                                                                                            |
| 4040274 | 0.04330814  | down | -1.4065487 | Pdia4         | 12304     | Mus musculus protein disulfide isomerase associated 4 (Pdia4), mRNA.                                                                                          |
| 130121  | 0.020921338 | down | -1.4068927 | Asah1         | 11886     | Mus musculus N-acylsphingosine amidohydrolase 1 (Asah1), mRNA.                                                                                                |
| 6250541 | 0.04330814  | down | -1.4074868 | Hist1h4i      | 319158    | Mus musculus histone cluster 1, H4i (Hist1h4i), mRNA.                                                                                                         |
| 5910300 | 0.020921338 | down | -1.4081486 | Fbxo4         | 106052    | Mus musculus F-box protein 4 (Fbxo4), mRNA.                                                                                                                   |
| 3440685 | 0.020921338 | down | -1.410119  | Spata6        | 67946     | Mus musculus spermatogenesis associated 6 (Spata6), mRNA.                                                                                                     |
| 4200162 | 0.020921338 | down | -1.4108971 | Rbx1          | 56438     | Mus musculus ring-box 1 (Rbx1), mRNA.                                                                                                                         |
| 7610392 | 0.020921338 | down | -1.4108979 | Acot7         | 70025     | Mus musculus acyl-CoA thioesterase 7 (Acot7), mRNA.                                                                                                           |
| 6480026 | 0.04330814  | down | -1.4117277 | Galnt1        | 14423     | Mus musculus UDP-N-acetyl-alpha-D-galactosamine:polypeptide N-acetylgalactosaminyltransferase 1 (Galnt1), mRNA.                                               |
| 60133   | 0.020921338 | down | -1.412037  | Khdrbs1       | 20218     | Mus musculus KH domain containing, RNA binding, signal transduction associated 1 (Khdrbs1), mRNA.                                                             |
| 2480280 | 0.04330814  | down | -1.4121072 | Cpsf6         | 432508    | Mus musculus cleavage and polyadenylation specific factor 6 (Cpsf6), mRNA.                                                                                    |
| 2970035 | 0.042066425 | down | -1.4124349 | 1700034H14Rik | 67105     | Mus musculus RIKEN cDNA 1700034H14 gene (1700034H14Rik), mRNA.                                                                                                |
| 4760471 | 0.04330814  | down | -1.4136553 | Khdrbs1       | 20218     | Mus musculus KH domain containing, RNA binding, signal transduction associated 1 (Khdrbs1), mRNA.                                                             |
| 7160167 | 0.020921338 | down | -1.4140624 | Emp1          | 13730     | Mus musculus epithelial membrane protein 1 (Emp1), mRNA.                                                                                                      |
| 5340630 | 0.020921338 | down | -1.4153326 | Ets1          | 23871     | Mus musculus E26 avian leukemia oncogene 1, 5' domain (Ets1), transcript variant 2, mRNA.                                                                     |
| 1050762 | 0.020921338 | down | -1.4159192 | Napa          | 108124    | Mus musculus N-ethylmaleimide sensitive fusion protein attachment protein alpha (Napa), mRNA.                                                                 |
| 1570379 | 0.020921338 | down | -1.4162275 | Prmt5         | 27374     | Mus musculus protein arginine N-methyltransferase 5 (Prmt5), mRNA.                                                                                            |
| 540634  | 0.020921338 | down | -1.4172071 | Setd3         | 52690     | Mus musculus SET domain containing 3 (Setd3), mRNA.                                                                                                           |
| 3290343 | 0.020921338 | down | -1.4176878 | Mrps11        | 67994     | Mus musculus mitochondrial ribosomal protein S11 (Mrps11), mRNA.                                                                                              |
| 6020593 | 0.020921338 | down | -1.4184494 | Atp6ap2       | 70495     | Mus musculus ATPase, H <sup>+</sup> transporting, lysosomal accessory protein 2 (Atp6ap2), mRNA.                                                              |
| 4890100 | 0.020921338 | down | -1.4215394 | LOC100047674  | 100047674 | PREDICTED: Mus musculus similar to solute carrier family 35 (UDP-glucuronic acid/UDP-N-acetylgalactosamine dual transporter), member D1 (LOC100047674), mRNA. |
| 5050451 | 0.020921338 | down | -1.4221252 | H2-D4         | 14967     | Mus musculus histocompatibility 2, D region locus 4 (H2-D4), mRNA.                                                                                            |
| 6200121 | 0.020921338 | down | -1.4221786 | Dars          | 226414    | Mus musculus aspartyl-tRNA synthetase (Dars), mRNA.                                                                                                           |
| 5910601 | 0.020921338 | down | -1.4225235 | Gorasp2       | 70231     | Mus musculus golgi reassembly stacking protein 2 (Gorasp2), mRNA.                                                                                             |
| 5390382 | 0.04330814  | down | -1.4225535 | Tprgl         | 67808     | Mus musculus transformation related protein 63 regulated like (Tprgl), mRNA.                                                                                  |
| 3130301 | 0.020921338 | down | -1.4232844 | Rbm45         | 241490    | Mus musculus RNA binding motif protein 45 (Rbm45), mRNA.                                                                                                      |
| 1780324 | 0.020921338 | down | -1.4241095 | Ccr5          | 12774     | Mus musculus chemokine (C-C motif) receptor 5 (Ccr5), mRNA.                                                                                                   |
| 2450059 | 0.04330814  | down | -1.4241285 | Prdx3         |           |                                                                                                                                                               |
| 7380047 | 0.020921338 | down | -1.4245645 | Heca          | 380629    | Mus musculus headcase homolog (Drosophila) (Heca), mRNA.                                                                                                      |
| 6060497 | 0.04330814  | down | -1.425449  | Dap3          | 65111     | Mus musculus death associated protein 3 (Dap3), nuclear gene encoding mitochondrial protein, mRNA.                                                            |
| 6590377 | 0.020921338 | down | -1.4261566 | Tceb1         | 67923     | Mus musculus transcription elongation factor B (SIII), polypeptide 1 (Tceb1), mRNA.                                                                           |
| 1170474 | 0.020921338 | down | -1.4261887 | Fbxo33        | 70611     | Mus musculus F-box protein 33 (Fbxo33), mRNA.                                                                                                                 |
| 3310161 | 0.020921338 | down | -1.4270712 | Decr2         |           |                                                                                                                                                               |
| 5690327 | 0.04330814  | down | -1.4280318 | Tmem49        | 75909     | Mus musculus transmembrane protein 49 (Tmem49), mRNA.                                                                                                         |
| 6940451 | 0.020921338 | down | -1.4293723 | Myadm         | 50918     | Mus musculus myeloid-associated differentiation marker (Myadm), mRNA.                                                                                         |
| 7560328 | 0.04330814  | down | -1.4304217 | Tssc1         | 380752    | Mus musculus tumor suppressing subtransferable candidate 1 (Tssc1), mRNA.                                                                                     |
| 6480092 | 0.04330814  | down | -1.4306353 | Exosc4        | 109075    | Mus musculus exosome component 4 (Exosc4), mRNA.                                                                                                              |
| 4200615 | 0.04330814  | down | -1.4309359 | Banf1         | 23825     | Mus musculus barrier to autointegration factor 1 (Banf1), transcript variant 1, mRNA.                                                                         |
| 6900196 | 0.04330814  | down | -1.4314274 | Abi1          | 11308     | Mus musculus abl-interactor 1 (Abi1), transcript variant 5, mRNA.                                                                                             |
| 6590008 | 0.020921338 | down | -1.4318987 | Rps4y2        | 66184     | Mus musculus ribosomal protein S4, Y-linked 2 (Rps4y2), non-coding RNA.                                                                                       |
| 4850682 | 0.020921338 | down | -1.4319913 | Tgif1         | 21815     | Mus musculus TGFB-induced factor homeobox 1 (Tgif1), mRNA.                                                                                                    |
| 620431  | 0.020921338 | down | -1.4322772 | Drg1          | 13494     | Mus musculus developmentally regulated GTP binding protein 1 (Drg1), mRNA.                                                                                    |
| 6350044 | 0.020921338 | down | -1.4329718 | Slc2a1        | 20525     | Mus musculus solute carrier family 2 (facilitated glucose transporter), member 1 (Slc2a1), mRNA.                                                              |
| 50279   | 0.020921338 | down | -1.4336342 | Hbs1l         | 56422     | Mus musculus Hbs1-like (S. cerevisiae) (Hbs1l), transcript variant 2, mRNA.                                                                                   |

|         |             |      |            |               |           |                                                                                                                                   |
|---------|-------------|------|------------|---------------|-----------|-----------------------------------------------------------------------------------------------------------------------------------|
| 2490370 | 0.020921338 | down | -1.4337709 | Asb3          | 65257     | Mus musculus ankyrin repeat and SOCS box-containing 3 (Asb3), mRNA.                                                               |
| 7400008 | 0.04330814  | down | -1.4348916 | Pde6d         | 18582     | Mus musculus phosphodiesterase 6D, cGMP-specific, rod, delta (Pde6d), mRNA.                                                       |
| 1190707 | 0.020921338 | down | -1.435197  | Itgb3bp       | 67733     | Mus musculus integrin beta 3 binding protein (beta3-endonexin) (Itgb3bp), mRNA.                                                   |
| 2340382 | 0.020921338 | down | -1.4352931 | Htatip2       | 53415     | Mus musculus HIV-1 tat interactive protein 2, homolog (human) (Htatip2), mRNA.                                                    |
| 380433  | 0.04330814  | down | -1.4358904 | Golt1b        | 66964     | Mus musculus golgi transport 1 homolog B ( <i>S. cerevisiae</i> ) (Golt1b), mRNA.                                                 |
| 1940072 | 0.020921338 | down | -1.4362032 | Pde4a         | 18577     | Mus musculus phosphodiesterase 4A, cAMP specific (Pde4a), transcript variant 5, mRNA.                                             |
| 3780382 | 0.020921338 | down | -1.4365551 | Smad5         | 17129     | Mus musculus MAD homolog 5 ( <i>Drosophila</i> ) (Smad5), mRNA.                                                                   |
| 2120397 | 0.020921338 | down | -1.4368395 | Ccr5          | 12774     | Mus musculus chemokine (C-C motif) receptor 5 (Ccr5), mRNA.                                                                       |
| 5820603 | 0.020921338 | down | -1.4370714 | Nsdhl         | 18194     | Mus musculus NAD(P) dependent steroid dehydrogenase-like (Nsdhl), mRNA.                                                           |
| 4890327 | 0.020921338 | down | -1.437601  | Arl2bp        | 107566    | Mus musculus ADP-ribosylation factor-like 2 binding protein (Arl2bp), transcript variant 1, mRNA.                                 |
| 2680014 | 0.020921338 | down | -1.4387361 | Tollip        | 54473     | Mus musculus toll interacting protein (Tollip), mRNA.                                                                             |
| 2750128 | 0.020921338 | down | -1.4392022 | H2-Q8         | 15019     | Mus musculus histocompatibility 2, Q region locus 8 (H2-Q8), mRNA.                                                                |
| 4900725 | 0.020921338 | down | -1.440413  | BC005537      | 79555     | Mus musculus cDNA sequence BC005537 (BC005537), mRNA.                                                                             |
| 7380280 | 0.04330814  | down | -1.4418294 | Ttc33         | 67515     | Mus musculus tetratricopeptide repeat domain 33 (Ttc33), mRNA.                                                                    |
| 2940370 | 0.020921338 | down | -1.442178  | Surf2         | 20931     | Mus musculus surfet gene 2 (Surf2), mRNA.                                                                                         |
| 6580735 | 0.020921338 | down | -1.4422026 | Gtpbp1        | 14904     | Mus musculus GTP binding protein 1 (Gtpbp1), mRNA.                                                                                |
| 1240072 | 0.04330814  | down | -1.4424481 | Psme2         | 19188     | Mus musculus proteasome (prosome, macropain) 28 subunit, beta (Psme2), transcript variant 1, mRNA.                                |
| 1660039 | 0.04330814  | down | -1.4426416 | Slc14a1       | 108052    | Mus musculus solute carrier family 14 (urea transporter), member 1 (Slc14a1), mRNA.                                               |
| 2350189 | 0.020921338 | down | -1.4432144 | Nhp2l1        | 20826     | Mus musculus NHP2 non-histone chromosome protein 2-like 1 ( <i>S. cerevisiae</i> ) (Nhp2l1), mRNA.                                |
| 430368  | 0.020921338 | down | -1.4441231 | 4732496O08Rik | 242736    | Mus musculus RIKEN cDNA 4732496O08 gene (4732496O08Rik), mRNA.                                                                    |
| 5050056 | 0.04330814  | down | -1.4442501 | Eef1b2        | 55949     | Mus musculus eukaryotic translation elongation factor 1 beta 2 (Eef1b2), mRNA.                                                    |
| 5390639 | 0.04330814  | down | -1.4444947 | Cxcl2         | 20310     | Mus musculus chemokine (C-X-C motif) ligand 2 (Cxcl2), mRNA.                                                                      |
| 7380068 | 0.020921338 | down | -1.4446542 | Elovl1        | 54325     | Mus musculus elongation of very long chain fatty acids (FEN1/Elo2, SUR4/Elo3, yeast)-like 1 (Elovl1), transcript variant 3, mRNA. |
| 4560538 | 0.020921338 | down | -1.445594  | Lgsn          | 14661     | Mus musculus lengsin, lens protein with glutamine synthetase domain (Lgsn), mRNA.                                                 |
| 10438   | 0.020921338 | down | -1.4457601 | Rb1           | 19645     | Mus musculus retinoblastoma 1 (Rb1), mRNA.                                                                                        |
| 4070142 | 0.04330814  | down | -1.4462261 | Gadd45g       | 23882     | Mus musculus growth arrest and DNA-damage-inducible 45 gamma (Gadd45g), mRNA.                                                     |
| 3180750 | 0.020921338 | down | -1.446878  | Dbp           | 13170     | Mus musculus D site albumin promoter binding protein (Dbp), mRNA.                                                                 |
| 4570451 | 0.04330814  | down | -1.4479908 | Cdkn1c        | 12577     | Mus musculus cyclin-dependent kinase inhibitor 1C (P57) (Cdkn1c), mRNA.                                                           |
| 5870561 | 0.04330814  | down | -1.4510363 | Slc25a45      | 107375    | Mus musculus solute carrier family 25, member 45 (Slc25a45), mRNA.                                                                |
| 4900220 | 0.020921338 | down | -1.4510694 | B930041F14Rik | 230991    | Mus musculus RIKEN cDNA B930041F14 gene (B930041F14Rik), mRNA.                                                                    |
| 6130131 | 0.020921338 | down | -1.4519656 | H13           | 14950     | Mus musculus histocompatibility 13 (H13), mRNA.                                                                                   |
| 4260398 | 0.020921338 | down | -1.4520328 | Zbtb22        | 81630     | Mus musculus zinc finger and BTB domain containing 22 (Zbtb22), mRNA.                                                             |
| 380279  | 0.020921338 | down | -1.4523132 | Gdi2          | 14569     | Mus musculus guanosine diphosphate (GDP) dissociation inhibitor 2 (Gdi2), mRNA.                                                   |
| 1090064 | 0.020921338 | down | -1.4532398 | Cd55          | 13136     | Mus musculus CD55 antigen (Cd55), mRNA.                                                                                           |
| 1980561 | 0.020921338 | down | -1.4538314 | H3f3b         | 15081     | Mus musculus H3 histone, family 3B (H3f3b), mRNA.                                                                                 |
| 4200132 | 0.020921338 | down | -1.4549924 | Uck1          | 22245     | Mus musculus uridine-cytidine kinase 1 (Uck1), mRNA.                                                                              |
| 2710152 | 0.020921338 | down | -1.4558748 | Htatip2       | 53415     | Mus musculus HIV-1 tat interactive protein 2, homolog (human) (Htatip2), mRNA.                                                    |
| 4670228 | 0.020921338 | down | -1.4565867 | Gpnmb         | 93695     | Mus musculus glycoprotein (transmembrane) nmb (Gpnmb), mRNA.                                                                      |
| 2340288 | 0.020921338 | down | -1.456643  | Rnf138        | 56515     | Mus musculus ring finger protein 138 (Rnf138), transcript variant 2, mRNA.                                                        |
| 6520538 | 0.020921338 | down | -1.4566623 | Pmm2          |           |                                                                                                                                   |
| 2450753 | 0.020921338 | down | -1.458581  | Cd84          | 12523     | Mus musculus CD84 antigen (Cd84), mRNA.                                                                                           |
| 4850685 | 0.04330814  | down | -1.4587051 | Gmids         | 218138    | Mus musculus GDP-mannose 4, 6-dehydratase (Gmids), mRNA.                                                                          |
| 2230647 | 0.04330814  | down | -1.4602897 | Snrpa         |           |                                                                                                                                   |
| 7380296 | 0.04330814  | down | -1.4605767 | 2310022B05Rik | 69551     | Mus musculus RIKEN cDNA 2310022B05 gene (2310022B05Rik), mRNA.                                                                    |
| 3420754 | 0.020921338 | down | -1.4619001 | Il1b          |           |                                                                                                                                   |
| 290497  | 0.020921338 | down | -1.4625258 | Becn1         | 56208     | Mus musculus beclin 1 (coiled-coil, myosin-like BCL2-interacting protein) (Becn1), mRNA.                                          |
| 160370  | 0.020921338 | down | -1.4635795 | Mrpl3         | 94062     | Mus musculus mitochondrial ribosomal protein L3 (Mrpl3), nuclear gene encoding mitochondrial protein, mRNA.                       |
| 6660500 | 0.020921338 | down | -1.4644278 | Tbrg4         | 21379     | Mus musculus transforming growth factor beta regulated gene 4 (Tbrg4), mRNA.                                                      |
| 1980703 | 0.020921338 | down | -1.464799  | Snx2          |           |                                                                                                                                   |
| 610278  | 0.020921338 | down | -1.4656732 | Rpo2tc1       |           |                                                                                                                                   |
| 4640348 | 0.04330814  | down | -1.4673241 | EG630499      | 630499    | Mus musculus predicted gene, EG630499 (EG630499), mRNA.                                                                           |
| 2510519 | 0.020921338 | down | -1.468203  | LOC100046918  | 100046918 | PREDICTED: Mus musculus similar to Electron transferring flavoprotein, alpha polypeptide (LOC100046918), mRNA.                    |

|         |             |      |            |               |           |                                                                                                                                         |
|---------|-------------|------|------------|---------------|-----------|-----------------------------------------------------------------------------------------------------------------------------------------|
| 5080326 | 0.020921338 | down | -1.4685342 | S100a6        | 20200     | Mus musculus S100 calcium binding protein A6 (calcyclin) (S100a6), mRNA.                                                                |
| 6580427 | 0.020921338 | down | -1.4687827 | LOC100047012  | 100047012 | PREDICTED: Mus musculus similar to ubiquitin-conjugating enzyme UbcM2 (LOC100047012), mRNA.                                             |
| 6180431 | 0.020921338 | down | -1.4697467 | Fam108b       | 226016    | Mus musculus family with sequence similarity 108, member B (Fam108b), mRNA.                                                             |
| 4050609 | 0.020921338 | down | -1.4704887 | Vti1a         | 53611     | Mus musculus vesicle transport through interaction with t-SNAREs homolog 1A (yeast) (Vti1a), mRNA.                                      |
| 3400564 | 0.020921338 | down | -1.4705038 | Bex2          | 12069     | Mus musculus brain expressed X-linked 2 (Bex2), mRNA.                                                                                   |
| 5820646 | 0.020921338 | down | -1.4709091 | Ptp4a2        |           |                                                                                                                                         |
| 7650152 | 0.020921338 | down | -1.4714829 | Gpr146        |           |                                                                                                                                         |
| 1010296 | 0.020921338 | down | -1.4719995 | Tubb2b        | 73710     | Mus musculus tubulin, beta 2b (Tubb2b), mRNA.                                                                                           |
| 360091  | 0.020921338 | down | -1.4721873 | Mif4gd        | 69674     | Mus musculus MIF4G domain containing (Mif4gd), mRNA.                                                                                    |
| 6510307 | 0.04330814  | down | -1.4739115 | Stk19         | 54402     | Mus musculus serine/threonine kinase 19 (Stk19), mRNA.                                                                                  |
| 1110113 | 0.020921338 | down | -1.4739463 | Atp6v1g1      | 66290     | Mus musculus ATPase, H+ transporting, lysosomal V1 subunit G1 (Atp6v1g1), mRNA.                                                         |
| 1400519 | 0.020921338 | down | -1.4741585 | Mak16         | 67920     | Mus musculus MAK16 homolog (S. cerevisiae) (Mak16), mRNA.                                                                               |
| 6270092 | 0.020921338 | down | -1.4750516 | Rps15a        | 267019    | Mus musculus ribosomal protein S15a (Rps15a), mRNA.                                                                                     |
| 2760544 | 0.04330814  | down | -1.4769877 | Tspo          | 12257     | Mus musculus translocator protein (Tspo), mRNA.                                                                                         |
| 2810746 | 0.020921338 | down | -1.4783276 | Gbas          | 14467     | Mus musculus glioblastoma amplified sequence (Gbas), mRNA.                                                                              |
| 650373  | 0.020921338 | down | -1.4793512 | Banf1         | 23825     | Mus musculus barrier to autointegration factor 1 (Banf1), transcript variant 1, mRNA.                                                   |
| 4850543 | 0.020921338 | down | -1.4826332 | Sumo3         | 20610     | Mus musculus SMT3 suppressor of mif two 3 homolog 3 (yeast) (Sumo3), mRNA.                                                              |
| 3610768 | 0.020921338 | down | -1.4835283 | Naglu         | 27419     | Mus musculus alpha-N-acetylglucosaminidase (Sanfilippo disease IIIB) (Naglu), mRNA.                                                     |
| 5560288 | 0.020921338 | down | -1.4839917 | Ctla4         | 12477     | Mus musculus cytotoxic T-lymphocyte-associated protein 4 (Ctla4), mRNA.                                                                 |
| 6860600 | 0.04330814  | down | -1.4847392 | Gbp2          | 14469     | Mus musculus guanylate binding protein 2 (Gbp2), mRNA.                                                                                  |
| 6330377 | 0.020921338 | down | -1.4850955 | Gadd45g       | 23882     | Mus musculus growth arrest and DNA-damage-inducible 45 gamma (Gadd45g), mRNA.                                                           |
| 110280  | 0.020921338 | down | -1.4864929 | Polr2d        | 69241     | Mus musculus polymerase (RNA) II (DNA directed) polypeptide D (Polr2d), transcript variant 1, mRNA.                                     |
| 4920369 | 0.020921338 | down | -1.4871473 | Insig1        | 231070    | Mus musculus insulin induced gene 1 (Insig1), mRNA.                                                                                     |
| 2320403 | 0.020921338 | down | -1.4872578 | Gch1          | 14528     | Mus musculus GTP cyclohydrolase 1 (Gch1), mRNA.                                                                                         |
| 5420735 | 0.020921338 | down | -1.4874417 | Tnfrsf13b     | 57916     | Mus musculus tumor necrosis factor receptor superfamily, member 13b (Tnfrsf13b), mRNA.                                                  |
| 7560110 | 0.020921338 | down | -1.4876516 | Snx2          |           |                                                                                                                                         |
| 430605  | 0.020921338 | down | -1.4881622 | Ythdf2        | 213541    | Mus musculus YTH domain family 2 (Ythdf2), mRNA.                                                                                        |
| 7400400 | 0.020921338 | down | -1.4890476 | LOC100041103  | 100041103 | PREDICTED: Mus musculus hypothetical protein LOC100041103 (LOC100041103), mRNA.                                                         |
| 620541  | 0.020921338 | down | -1.4895899 | Rab5a         | 271457    | Mus musculus RAB5A, member RAS oncogene family (Rab5a), mRNA.                                                                           |
| 7560047 | 0.020921338 | down | -1.4919235 | Phgdh         | 236539    | Mus musculus 3-phosphoglycerate dehydrogenase (Phgdh), mRNA.                                                                            |
| 6280296 | 0.04330814  | down | -1.4920828 | Thg1l         | 66628     | Mus musculus tRNA-histidine guanylyltransferase 1-like (S. cerevisiae) (Thg1l), mRNA.                                                   |
| 3120133 | 0.04330814  | down | -1.4923041 | 0610006i08Rik | 66836     | Mus musculus RIKEN cDNA 0610006i08 gene (0610006i08Rik), mRNA.                                                                          |
| 1430600 | 0.020921338 | down | -1.492491  | Acot2         | 171210    | Mus musculus acyl-CoA thioesterase 2 (Acot2), nuclear gene encoding mitochondrial protein, mRNA.                                        |
| 3170546 | 0.020921338 | down | -1.4944863 | Ppp1cc        | 19047     | Mus musculus protein phosphatase 1, catalytic subunit, gamma isoform (Ppp1cc), mRNA.                                                    |
| 2510561 | 0.020921338 | down | -1.4947637 | Myl4          | 17896     | Mus musculus myosin, light polypeptide 4 (Myl4), mRNA.                                                                                  |
| 290168  | 0.020921338 | down | -1.4947836 | Sqle          | 20775     | Mus musculus squalene epoxidase (Sqle), mRNA.                                                                                           |
| 3610487 | 0.020921338 | down | -1.4952549 | Dusp4         | 319520    | Mus musculus dual specificity phosphatase 4 (Dusp4), mRNA.                                                                              |
| 110181  | 0.020921338 | down | -1.495742  | 1200003C05Rik | 104771    | Mus musculus RIKEN cDNA 1200003C05 gene (1200003C05Rik), mRNA.                                                                          |
| 4120669 | 0.020921338 | down | -1.4966984 | LOC100046320  | 100046320 | PREDICTED: Mus musculus similar to Matrin 3 (LOC100046320), misc RNA.                                                                   |
| 4570368 | 0.04330814  | down | -1.4968346 | Errfi1        | 74155     | Mus musculus ERBB receptor feedback inhibitor 1 (Errfi1), mRNA.                                                                         |
| 1820674 | 0.020921338 | down | -1.4969264 | Gpr108        | 78308     | Mus musculus G protein-coupled receptor 108 (Gpr108), mRNA.                                                                             |
| 5360390 | 0.020921338 | down | -1.4983842 | Wdr45l        | 66840     | Mus musculus Wdr45 like (Wdr45l), mRNA.                                                                                                 |
| 7150541 | 0.020921338 | down | -1.4985514 | Arl4a         | 11861     | Mus musculus ADP-ribosylation factor-like 4A (Arl4a), transcript variant 1, mRNA.                                                       |
| 3850458 | 0.020921338 | down | -1.4995857 | Taf9          | 108143    | Mus musculus TAF9 RNA polymerase II, TATA box binding protein (TBP)-associated factor (Taf9), transcript variant 1, mRNA.               |
| 610273  | 0.020921338 | down | -1.5007527 | Obfc2a        | 109019    | Mus musculus oligonucleotide/oligosaccharide-binding fold containing 2A (Obfc2a), mRNA.                                                 |
| 1070224 | 0.020921338 | down | -1.5013912 | Emp3          | 13732     | Mus musculus epithelial membrane protein 3 (Emp3), mRNA.                                                                                |
| 2190554 | 0.04330814  | down | -1.5015001 | Nrf1          | 18181     | Mus musculus nuclear respiratory factor 1 (Nrf1), mRNA.                                                                                 |
| 3610100 | 0.020921338 | down | -1.5019418 | Mylc2b        | 67938     | Mus musculus myosin light chain, regulatory B (Mylc2b), mRNA.                                                                           |
| 5960358 | 0.020921338 | down | -1.5026392 | Prkrir        | 72981     | Mus musculus protein-kinase, interferon-inducible double stranded RNA dependent inhibitor, repressor of (P58 repressor) (Prkrir), mRNA. |
| 3940468 | 0.020921338 | down | -1.5030781 | 0910001A06Rik | 223601    | Mus musculus RIKEN cDNA 0910001A06 gene (0910001A06Rik), mRNA.                                                                          |
| 1030048 | 0.020921338 | down | -1.5034801 | Akr1c12       | 622402    | Mus musculus aldo-keto reductase family 1, member C12 (Akr1c12), mRNA.                                                                  |
| 430746  | 0.020921338 | down | -1.5036002 | Sit1          | 54390     | Mus musculus suppression inducing transmembrane adaptor 1 (Sit1), mRNA.                                                                 |
| 3370332 | 0.020921338 | down | -1.5037665 | Hes6          | 55927     | Mus musculus hairy and enhancer of split 6 (Drosophila) (Hes6), mRNA.                                                                   |



|         |             |      |            |               |        |                                                                                                                                              |
|---------|-------------|------|------------|---------------|--------|----------------------------------------------------------------------------------------------------------------------------------------------|
| 3840240 | 0.04330814  | down | -1.5040385 | Hagl          |        |                                                                                                                                              |
| 870379  | 0.020921338 | down | -1.5056868 | Rnf167        | 70510  | Mus musculus ring finger protein 167 (Rnf167), mRNA.                                                                                         |
| 2750598 | 0.04330814  | down | -1.5059618 | Rab24         | 19336  | Mus musculus RAB24, member RAS oncogene family (Rab24), mRNA.                                                                                |
| 4670544 | 0.04330814  | down | -1.5065094 | Tspo          | 12257  | Mus musculus translocator protein (Tspo), mRNA.                                                                                              |
| 5290639 | 0.020921338 | down | -1.5065522 | Fem1c         | 240263 | Mus musculus fem-1 homolog c (C.elegans) (Fem1c), mRNA.                                                                                      |
| 7650524 | 0.020921338 | down | -1.5068823 | Nsmce2        | 68501  | Mus musculus non-SMC element 2 homolog (MMS21, <i>S. cerevisiae</i> ) (Nsmce2), mRNA.                                                        |
| 6200360 | 0.04330814  | down | -1.5072879 | Tmed4         | 103694 | Mus musculus transmembrane emp24 protein transport domain containing 4 (Tmed4), mRNA.                                                        |
| 5690431 | 0.04330814  | down | -1.5092794 | LOC547323     | 547323 | Mus musculus similar to RIKEN cDNA A430107P09 gene (LOC547323), mRNA.                                                                        |
| 6020301 | 0.04330814  | down | -1.5093126 | Gyg           | 27357  | Mus musculus glycogenin (Gyg), mRNA.                                                                                                         |
| 770328  | 0.04330814  | down | -1.5110381 | Faah          | 14073  | Mus musculus fatty acid amide hydrolase (Faah), mRNA.                                                                                        |
| 6420411 | 0.020921338 | down | -1.512331  | Clns1a        | 12729  | Mus musculus chloride channel, nucleotide-sensitive, 1A (Clns1a), mRNA.                                                                      |
| 1570537 | 0.020921338 | down | -1.5123808 | Cd86          | 12524  | Mus musculus CD86 antigen (Cd86), mRNA.                                                                                                      |
| 3890332 | 0.020921338 | down | -1.5140082 | Gadd45a       | 13197  | Mus musculus growth arrest and DNA-damage-inducible 45 alpha (Gadd45a), mRNA.                                                                |
| 3840753 | 0.04330814  | down | -1.5142987 | Polr2d        | 69241  | Mus musculus polymerase (RNA) II (DNA directed) polypeptide D (Polr2d), transcript variant 1, mRNA.                                          |
| 1690678 | 0.04330814  | down | -1.5158004 | 0610007C21Rik | 381629 | Mus musculus RIKEN cDNA 0610007C21 gene (0610007C21Rik), transcript variant 1, mRNA.                                                         |
| 4290273 | 0.04330814  | down | -1.5162624 | Ampd1         | 229665 | Mus musculus adenosine monophosphate deaminase 1 (isoform M) (Ampd1), mRNA. XM_921992                                                        |
| 1230592 | 0.020921338 | down | -1.5163534 | Mobk13        | 19070  | Mus musculus MOB1, Mps One Binder kinase activator-like 3 (yeast) (Mobk13), mRNA.                                                            |
| 4850681 | 0.04330814  | down | -1.5172206 | 2810002N01Rik | 68020  | Mus musculus RIKEN cDNA 2810002N01 gene (2810002N01Rik), mRNA.                                                                               |
| 6100021 | 0.020921338 | down | -1.5177723 | Mylc2b        | 67938  | Mus musculus myosin light chain, regulatory B (Mylc2b), mRNA.                                                                                |
| 290048  | 0.020921338 | down | -1.5188249 | C730025P13Rik | 227615 | Mus musculus RIKEN cDNA C730025P13 gene (C730025P13Rik), mRNA.                                                                               |
| 540020  | 0.020921338 | down | -1.5193579 | Cyp51         | 13121  | Mus musculus cytochrome P450, family 51 (Cyp51), mRNA.                                                                                       |
| 160491  | 0.020921338 | down | -1.5195879 | Ptp4a2        | 19244  | Mus musculus protein tyrosine phosphatase 4a2 (Ptp4a2), mRNA.                                                                                |
| 5290086 | 0.020921338 | down | -1.5207857 | Naca          | 17938  | Mus musculus nascent polypeptide-associated complex alpha polypeptide (Naca), mRNA.                                                          |
| 4200731 | 0.020921338 | down | -1.5210047 | Golga7        | 57437  | Mus musculus golgi autoantigen, golgin subfamily a, 7 (Golga7), transcript variant 2, mRNA.                                                  |
| 5720646 | 0.020921338 | down | -1.5228951 | S100a4        | 20198  | Mus musculus S100 calcium binding protein A4 (S100a4), mRNA.                                                                                 |
| 6520484 | 0.020921338 | down | -1.523115  | Eif4g2        |        |                                                                                                                                              |
| 5910349 | 0.020921338 | down | -1.5243818 | Decr2         |        |                                                                                                                                              |
| 110059  | 0.020921338 | down | -1.5245504 | Cep57         | 74360  | Mus musculus centrosomal protein 57 (Cep57), mRNA.                                                                                           |
| 4230402 | 0.020921338 | down | -1.5274925 | Ltb4r1        | 16995  | Mus musculus leukotriene B4 receptor 1 (Ltb4r1), mRNA.                                                                                       |
| 1980048 | 0.020921338 | down | -1.5281972 | Gimap5        | 317757 | Mus musculus GTPase, IMAP family member 5 (Gimap5), mRNA.                                                                                    |
| 6450646 | 0.04330814  | down | -1.5283128 | Ilvbl         | 216136 | Mus musculus ilvB (bacterial acetolactate synthase)-like (Ilvbl), mRNA.                                                                      |
| 5080435 | 0.020921338 | down | -1.5293632 | Igfbp4        |        |                                                                                                                                              |
| 1110025 | 0.020164572 | down | -1.5306407 | Ppp1ca        | 19045  | Mus musculus protein phosphatase 1, catalytic subunit, alpha isoform (Ppp1ca), mRNA.                                                         |
| 2850133 | 0.04330814  | down | -1.5318395 | Msn           | 17698  | Mus musculus moesin (Msn), mRNA.                                                                                                             |
| 4200296 | 0.020921338 | down | -1.5327293 | Fem1c         | 240263 | Mus musculus fem-1 homolog c (C.elegans) (Fem1c), mRNA.                                                                                      |
| 6280477 | 0.04330814  | down | -1.532987  | Ifng          | 15978  | Mus musculus interferon gamma (Ifng), mRNA.                                                                                                  |
| 540338  | 0.04330814  | down | -1.5353385 | Dctn3         | 53598  | Mus musculus dynactin 3 (Dctn3), mRNA.                                                                                                       |
| 7510154 | 0.04330814  | down | -1.5358397 | Ets2          | 23872  | Mus musculus E26 avian leukemia oncogene 2, 3' domain (Ets2), mRNA.                                                                          |
| 6400382 | 0.020921338 | down | -1.5381416 | Armc8         | 74125  | Mus musculus armadillo repeat containing 8 (Armc8), mRNA.                                                                                    |
| 6580685 | 0.020921338 | down | -1.5381678 | Ppp1cb        |        |                                                                                                                                              |
| 1770669 | 0.04330814  | down | -1.5396427 | Tssc1         | 380752 | Mus musculus tumor suppressing subtransferable candidate 1 (Tssc1), mRNA.                                                                    |
| 2510026 | 0.020921338 | down | -1.5396945 | Rnf167        | 70510  | Mus musculus ring finger protein 167 (Rnf167), mRNA.                                                                                         |
| 1690201 | 0.020921338 | down | -1.541218  | Padi1         | 18599  | Mus musculus peptidyl arginine deiminase, type I (Padi1), mRNA.                                                                              |
| 520598  | 0.04330814  | down | -1.5439954 | 5730437N04Rik | 70544  | Mus musculus RIKEN cDNA 5730437N04 gene (5730437N04Rik), mRNA.                                                                               |
| 670196  | 0.020921338 | down | -1.5448968 | Gmppa         | 69080  | Mus musculus GDP-mannose pyrophosphorylase A (Gmppa), mRNA.                                                                                  |
| 3420762 | 0.020921338 | down | -1.5465271 | Tmed4         | 103694 | Mus musculus transmembrane emp24 protein transport domain containing 4 (Tmed4), mRNA.                                                        |
| 5490187 | 0.020921338 | down | -1.5471634 | Srgn          | 19073  | Mus musculus serglycin (Srgn), mRNA.                                                                                                         |
| 2510593 | 0.04330814  | down | -1.5473058 | Txnl4a        | 27366  | Mus musculus thioredoxin-like 4A (Txnl4a), transcript variant 2, mRNA.                                                                       |
| 4830632 | 0.04330814  | down | -1.5480926 | Polr1d        | 20018  | Mus musculus polymerase (RNA) I polypeptide D (Polr1d), transcript variant 1, mRNA.                                                          |
| 2810243 | 0.020921338 | down | -1.5481114 | Cdkn1b        | 12576  | Mus musculus cyclin-dependent kinase inhibitor 1B (Cdkn1b), mRNA.                                                                            |
| 3870685 | 0.04330814  | down | -1.5508337 | Capzb         | 12345  | Mus musculus capping protein (actin filament) muscle Z-line, beta (Capzb), transcript variant 1, mRNA.                                       |
| 4120753 | 0.020921338 | down | -1.5516269 | Lmna          | 16905  | Mus musculus lamin A (Lmna), transcript variant 2, mRNA.                                                                                     |
| 6650411 | 0.020921338 | down | -1.5523722 | Cd226         | 225825 | Mus musculus CD226 antigen (Cd226), transcript variant 2, mRNA.                                                                              |
| 2760064 | 0.020921338 | down | -1.5540498 | Raly          | 19383  | Mus musculus hnRNP-associated with lethal yellow (Raly), mRNA.                                                                               |
| 5720139 | 0.020921338 | down | -1.5546325 | Ati2          | 56298  | Mus musculus atlastin GTPase 2 (Ati2), transcript variant 1, mRNA.                                                                           |
| 5820561 | 0.020921338 | down | -1.5561783 | Fvt1          | 70750  | Mus musculus follicular lymphoma variant translocation 1 (Fvt1), mRNA.                                                                       |
| 1090577 | 0.042066425 | down | -1.5592685 | Mtch2         | 56428  | XM_921793 XM_985103<br>Mus musculus mitochondrial carrier homolog 2 (C. elegans) (Mtch2), nuclear gene encoding mitochondrial protein, mRNA. |

|         |             |      |            |               |           |                                                                                                            |
|---------|-------------|------|------------|---------------|-----------|------------------------------------------------------------------------------------------------------------|
| 4390551 | 0.04330814  | down | -1.5649233 | Polr2d        | 69241     | Mus musculus polymerase (RNA) II (DNA directed) polypeptide D (Polr2d), transcript variant 1, mRNA.        |
| 2350564 | 0.020921338 | down | -1.564968  | Sumo3         |           |                                                                                                            |
| 3830309 | 0.020921338 | down | -1.5655707 | EG433923      | 433923    | Mus musculus predicted gene, EG433923 (EG433923), mRNA.                                                    |
| 7150376 | 0.020921338 | down | -1.5704309 | Fgfr1op2      | 67529     | Mus musculus FGFR1 oncogene partner 2 (Fgfr1op2), mRNA.                                                    |
| 4810471 | 0.020921338 | down | -1.5705953 | Stk19         | 54402     | Mus musculus serine/threonine kinase 19 (Stk19), mRNA.                                                     |
| 4900053 | 0.04330814  | down | -1.5725168 | Ier5l         | 72500     | Mus musculus immediate early response 5-like (Ier5l), mRNA.                                                |
| 1050059 | 0.04330814  | down | -1.5747819 | Mnat1         |           |                                                                                                            |
| 1070097 | 0.020921338 | down | -1.5760581 | Hsd17b7       | 15490     | Mus musculus hydroxysteroid (17-beta) dehydrogenase 7 (Hsd17b7), mRNA.                                     |
| 3140047 | 0.04330814  | down | -1.5763437 | Glb1          | 12091     | Mus musculus galactosidase, beta 1 (Glb1), mRNA.                                                           |
| 5290279 | 0.020921338 | down | -1.5764096 | Hmgb2         | 97165     | Mus musculus high mobility group box 2 (Hmgb2), mRNA.                                                      |
| 5820438 | 0.020921338 | down | -1.5787129 | Cd226         | 225825    | Mus musculus CD226 antigen (Cd226), transcript variant 1, mRNA.                                            |
| 3610719 | 0.020921338 | down | -1.5799983 | Uck1          | 22245     | Mus musculus uridine-cytidine kinase 1 (Uck1), mRNA.                                                       |
| 4250452 | 0.020921338 | down | -1.5814232 | LOC100046136  | 100046136 | PREDICTED: Mus musculus hypothetical protein LOC100046136 (LOC100046136), mRNA.                            |
| 5700632 | 0.04330814  | down | -1.5823574 | Trat1         | 77647     | Mus musculus T cell receptor associated transmembrane adaptor 1 (Trat1), mRNA.                             |
| 380102  | 0.020921338 | down | -1.5824202 | Ahnak         | 66395     | Mus musculus AHNAK nucleoprotein (desmoyokin) (Ahnak), transcript variant 3, mRNA.                         |
| 990338  | 0.020921338 | down | -1.5825747 | Nsdhl         | 18194     | Mus musculus NAD(P) dependent steroid dehydrogenase-like (Nsdhl), mRNA.                                    |
| 7040670 | 0.020921338 | down | -1.5869906 | Nipsnap3a     | 66536     | Mus musculus nipsnap homolog 3A (C. elegans) (Nipsnap3a), mRNA.                                            |
| 3360471 | 0.020921338 | down | -1.5883149 | Capza1        | 12340     | Mus musculus capping protein (actin filament) muscle Z-line, alpha 1 (Capza1), mRNA.                       |
| 5670291 | 0.020921338 | down | -1.5936902 | Naca          | 17938     | Mus musculus nascent polypeptide-associated complex alpha polypeptide (Naca), mRNA.                        |
| 6330368 | 0.020921338 | down | -1.5938426 | Mnat1         | 17420     | Mus musculus menage a trois 1 (Mnat1), mRNA.                                                               |
| 1050379 | 0.020921338 | down | -1.5950642 | Ube2j2        | 140499    | Mus musculus ubiquitin-conjugating enzyme E2, J2 homolog (yeast) (Ube2j2), transcript variant 3, mRNA.     |
| 4070762 | 0.020921338 | down | -1.5975385 | Cdkn2c        | 12580     | Mus musculus cyclin-dependent kinase inhibitor 2C (p18, inhibits CDK4) (Cdkn2c), mRNA.                     |
| 5860039 | 0.04330814  | down | -1.5982696 | Pim1          | 18712     | Mus musculus proviral integration site 1 (Pim1), mRNA.                                                     |
| 2060364 | 0.020921338 | down | -1.5984194 | Tmprss13      | 214531    | Mus musculus transmembrane protease, serine 13 (Tmprss13), mRNA.                                           |
| 7510358 | 0.020921338 | down | -1.6042236 | Rasgrp1       | 19419     | Mus musculus RAS guanyl releasing protein 1 (Rasgrp1), mRNA.                                               |
| 670538  | 0.04330814  | down | -1.6066616 | Dtymk         | 21915     | Mus musculus deoxythymidylate kinase (Dtymk), mRNA.                                                        |
| 1170482 | 0.020921338 | down | -1.6083655 | Rab1b         | 76308     | Mus musculus RAB1B, member RAS oncogene family (Rab1b), mRNA.                                              |
| 1300220 | 0.020921338 | down | -1.608408  | Tmprss13      | 214531    | Mus musculus transmembrane protease, serine 13 (Tmprss13), mRNA.                                           |
| 2030358 | 0.020921338 | down | -1.6086972 | LOC100047353  | 100047353 | PREDICTED: Mus musculus similar to myocardial vascular inhibition factor (LOC100047353), mRNA.             |
| 1050273 | 0.020921338 | down | -1.6097795 | Srp54         | 24067     | Mus musculus signal recognition particle 54 (Srp54), mRNA.                                                 |
| 4060291 | 0.020921338 | down | -1.6107317 | Ctps2         | 55936     | Mus musculus cytidine 5'-triphosphate synthase 2 (Ctps2), mRNA.                                            |
| 1400170 | 0.04330814  | down | -1.6125367 | Zfand2a       | 100494    | Mus musculus zinc finger, AN1-type domain 2A (Zfand2a), mRNA.                                              |
| 3170414 | 0.020921338 | down | -1.6140707 | Slc14a1       |           |                                                                                                            |
| 630725  | 0.04330814  | down | -1.6142786 | Tmem66        | 67887     | Mus musculus transmembrane protein 66 (Tmem66), mRNA.                                                      |
| 3360241 | 0.020921338 | down | -1.6180601 | 2310016C08Rik | 69573     | Mus musculus RIKEN cDNA 2310016C08 gene (2310016C08Rik), mRNA.                                             |
| 7200050 | 0.020921338 | down | -1.6204718 | Hes6          | 55927     | Mus musculus hairy and enhancer of split 6 (Drosophila) (Hes6), mRNA.                                      |
| 270367  | 0.020921338 | down | -1.6206795 | EG667977      | 667977    | Mus musculus predicted gene, EG667977 (EG667977), mRNA.                                                    |
| 2750091 | 0.020921338 | down | -1.6213658 | Adss          | 11566     | Mus musculus adenylosuccinate synthetase, non muscle (Adss), mRNA.                                         |
| 670161  | 0.020921338 | down | -1.6214513 | Sep-15        | 93684     | Mus musculus selenoprotein (Sep15), mRNA.                                                                  |
| 6520075 | 0.04330814  | down | -1.625779  | Ier3          | 15937     | Mus musculus immediate early response 3 (Ier3), mRNA.                                                      |
| 6480044 | 0.020921338 | down | -1.6265202 | Arl4c         | 320982    | Mus musculus ADP-ribosylation factor-like 4C (Arl4c), mRNA.                                                |
| 6580717 | 0.04330814  | down | -1.6266776 | Nt5c3l        | 68106     | Mus musculus 5'-nucleotidase, cytosolic III-like (Nt5c3l), mRNA.                                           |
| 3390739 | 0.020921338 | down | -1.6329564 | Edem2         | 108687    | Mus musculus ER degradation enhancer, mannosidase alpha-like 2 (Edem2), mRNA.                              |
| 3840519 | 0.020921338 | down | -1.6347127 | 0610037L13Rik |           |                                                                                                            |
| 3370273 | 0.04330814  | down | -1.6392429 | Chchd2        | 14004     | Mus musculus coiled-coil-helix-coiled-coil-helix domain containing 2 (Chchd2), mRNA.                       |
| 6590445 | 0.020921338 | down | -1.6465031 | Rbbp7         | 245688    | Mus musculus retinoblastoma binding protein 7 (Rbbp7), mRNA.                                               |
| 1990451 | 0.04330814  | down | -1.6468207 | Atp5f1        | 11950     | Mus musculus ATP synthase, H+ transporting, mitochondrial F0 complex, subunit b, isoform 1 (Atp5f1), mRNA. |
| 3310240 | 0.020921338 | down | -1.6469083 | EG665378      | 665378    | Mus musculus predicted gene, EG665378 (EG665378), mRNA.                                                    |
| 2190022 | 0.020921338 | down | -1.6516862 | A130090K04Rik | 320495    | Mus musculus RIKEN cDNA A130090K04 gene (A130090K04Rik), mRNA.                                             |
| 4210390 | 0.04330814  | down | -1.6577278 | 6330500D04Rik | 193385    | Mus musculus RIKEN cDNA 6330500D04 gene (6330500D04Rik), transcript variant 3, mRNA.                       |
| 5270279 | 0.020921338 | down | -1.6583862 | Alox5ap       | 11690     | Mus musculus arachidonate 5-lipoxygenase activating protein (Alox5ap), mRNA.                               |
| 5860138 | 0.020921338 | down | -1.658443  | Zfp386        | 56220     | Mus musculus zinc finger protein 386 (Kruppel-like) (Zfp386), transcript variant 2, mRNA.                  |
| 4250255 | 0.020921338 | down | -1.6616138 | Tug1          | 544752    | Mus musculus taurine upregulated gene 1 (Tug1), non-coding RNA.                                            |
| 670711  | 0.020921338 | down | -1.6629633 | Rbbp7         | 245688    | Mus musculus retinoblastoma binding protein 7 (Rbbp7), mRNA.                                               |
| 4290133 | 0.020921338 | down | -1.6642431 | Limd2         | 67803     | Mus musculus LIM domain containing 2 (Limd2), mRNA.                                                        |
| 2750326 | 0.020921338 | down | -1.6661727 | Egln3         | 112407    | Mus musculus EGL nine homolog 3 (C. elegans) (Egln3), mRNA.                                                |
| 2650653 | 0.020921338 | down | -1.6692872 | Nsdhl         | 18194     | Mus musculus NAD(P) dependent steroid dehydrogenase-like (Nsdhl), mRNA.                                    |
| 4860379 | 0.04330814  | down | -1.6713606 | Dusp2         | 13537     | Mus musculus dual specificity phosphatase 2 (Dusp2), mRNA.                                                 |

|         |             |      |            |               |           |                                                                                                                                                            |
|---------|-------------|------|------------|---------------|-----------|------------------------------------------------------------------------------------------------------------------------------------------------------------|
| 1240414 | 0.020921338 | down | -1.6769105 | Suclg1        | 56451     | Mus musculus succinate-CoA ligase, GDP-forming, alpha subunit (Suclg1), mRNA.                                                                              |
| 4210138 | 0.020921338 | down | -1.6779953 | Tes           | 21753     | Mus musculus testis derived transcript (Tes), transcript variant 1, mRNA.                                                                                  |
| 5550176 | 0.04330814  | down | -1.6783304 | Gm129         | 229599    | Mus musculus gene model 129, (NCBI) (Gm129), mRNA. XM_907670 XM_920513 XM_920520 XM_920527 XM_920533                                                       |
| 1570148 | 0.020921338 | down | -1.6785358 | 2610524H06Rik | 330173    | Mus musculus RIKEN cDNA 2610524H06 gene (2610524H06Rik), mRNA.                                                                                             |
| 510474  | 0.04330814  | down | -1.6787353 | Lgals3        | 16854     | Mus musculus lectin, galactose binding, soluble 3 (Lgals3), mRNA.                                                                                          |
| 6940521 | 0.020921338 | down | -1.6794391 | LOC100040592  | 100040592 | PREDICTED: Mus musculus similar to Hmgcs1 protein, transcript variant 1 (LOC100040592), mRNA.                                                              |
| 2750446 | 0.04330814  | down | -1.6816483 | Apip          | 56369     | Mus musculus APAF1 interacting protein (Apip), mRNA.                                                                                                       |
| 3780239 | 0.020921338 | down | -1.6841202 | Adk           | 11534     | Mus musculus adenosine kinase (Adk), mRNA.                                                                                                                 |
| 2650598 | 0.020921338 | down | -1.6845483 | Rbbp7         | 245688    | Mus musculus retinoblastoma binding protein 7 (Rbbp7), mRNA.                                                                                               |
| 6650196 | 0.020921338 | down | -1.6856637 | Ing3          | 71777     | Mus musculus inhibitor of growth family, member 3 (Ing3), mRNA.                                                                                            |
| 3290491 | 0.020921338 | down | -1.6906164 | Klf6          | 23849     | Mus musculus Kruppel-like factor 6 (Klf6), mRNA.                                                                                                           |
| 3370377 | 0.04330814  | down | -1.6918553 | Gadd45b       | 17873     | Mus musculus growth arrest and DNA-damage-inducible 45 beta (Gadd45b), mRNA.                                                                               |
| 870131  | 0.020921338 | down | -1.6929083 | Mar-07        | 57438     | Mus musculus membrane-associated ring finger (C3HC4) 7 (March7), mRNA.                                                                                     |
| 240594  | 0.020921338 | down | -1.6933451 | Tex264        | 21767     | Mus musculus testis expressed gene 264 (Tex264), transcript variant 1, mRNA.                                                                               |
| 2060435 | 0.020921338 | down | -1.7025989 | Sfrs5         | 20384     | Mus musculus splicing factor, arginine/serine-rich 5 (SRp40, HRS) (Sfrs5), transcript variant 2, mRNA.                                                     |
| 3310639 | 0.04330814  | down | -1.7038931 | Poldip2       | 67811     | Mus musculus polymerase (DNA-directed), delta interacting protein 2 (Poldip2), mRNA.                                                                       |
| 780348  | 0.020921338 | down | -1.7049872 | Grb7          | 14786     | Mus musculus growth factor receptor bound protein 7 (Grb7), mRNA.                                                                                          |
| 1660075 | 0.020921338 | down | -1.7054727 | BC003885      |           |                                                                                                                                                            |
| 870167  | 0.020921338 | down | -1.708463  | Rab7          | 19349     | Mus musculus RAB7, member RAS oncogene family (Rab7), mRNA.                                                                                                |
| 380324  | 0.020921338 | down | -1.7151586 | Drbp1         |           |                                                                                                                                                            |
| 2360164 | 0.020921338 | down | -1.7157449 | Hnrpa1        | 15382     | Mus musculus heterogeneous nuclear ribonucleoprotein A1 (Hnrpa1), transcript variant 2, mRNA.                                                              |
| 6980576 | 0.020921338 | down | -1.7183322 | Cirbp         | 12696     | Mus musculus cold inducible RNA binding protein (Cirbp), mRNA.                                                                                             |
| 3990397 | 0.04330814  | down | -1.719795  | Nipsnap1      | 18082     | Mus musculus 4-nitrophenylphosphatase domain and non-neuronal SNAP25-like protein homolog 1 (C. elegans) (Nipsnap1), mRNA.                                 |
| 2370754 | 0.020921338 | down | -1.7211057 | Pqlc3         | 217430    | Mus musculus PQ loop repeat containing (Pqlc3), mRNA.                                                                                                      |
| 60601   | 0.020921338 | down | -1.7226737 | 2900024C23Rik | 67266     | Mus musculus RIKEN cDNA 2900024C23 gene (2900024C23Rik), mRNA.                                                                                             |
| 4920273 | 0.020921338 | down | -1.7325027 | 2010311D03Rik | 109129    | Mus musculus RIKEN cDNA 2010311D03 gene (2010311D03Rik), mRNA.                                                                                             |
| 1940465 | 0.04330814  | down | -1.734218  | Pts           | 19286     | Mus musculus 6-pyruvoyl-tetrahydropterin synthase (Pts), mRNA.                                                                                             |
| 1240397 | 0.020921338 | down | -1.7372727 | Ppp2r5c       | 26931     | Mus musculus protein phosphatase 2, regulatory subunit B (B56), gamma isoform (Ppp2r5c), transcript variant 3, mRNA.                                       |
| 6840594 | 0.020921338 | down | -1.7377114 | Rgs1          | 50778     | Mus musculus regulator of G-protein signaling 1 (Rgs1), mRNA.                                                                                              |
| 3940133 | 0.020921338 | down | -1.7415626 | Mat2b         | 108645    | Mus musculus methionine adenosyltransferase II, beta (Mat2b), mRNA.                                                                                        |
| 3420767 | 0.020921338 | down | -1.7426975 | Snx17         | 266781    | Mus musculus sorting nexin 17 (Snx17), mRNA.                                                                                                               |
| 2340131 | 0.020921338 | down | -1.7503977 | Igf2bp3       | 140488    | Mus musculus insulin-like growth factor 2 mRNA binding protein 3 (Igf2bp3), mRNA.                                                                          |
| 1690719 | 0.020921338 | down | -1.7569245 | Lgmn          | 19141     | Mus musculus legumain (Lgmn), mRNA.                                                                                                                        |
| 1030133 | 0.020921338 | down | -1.7579134 | Tubb2b        | 73710     | Mus musculus tubulin, beta 2b (Tubb2b), mRNA.                                                                                                              |
| 3610414 | 0.020921338 | down | -1.7592145 | Ecsit         | 26940     | Mus musculus ECSIT homolog (Drosophila) (Ecsit), mRNA.                                                                                                     |
| 3180189 | 0.04330814  | down | -1.7610749 | Mrpl2         | 27398     | Mus musculus mitochondrial ribosomal protein L2 (Mrpl2), nuclear gene encoding mitochondrial protein, mRNA.                                                |
| 2850326 | 0.020921338 | down | -1.7668825 | Dnajb9        | 27362     | Mus musculus DnaJ (Hsp40) homolog, subfamily B, member 9 (Dnajb9), mRNA.                                                                                   |
| 460100  | 0.020921338 | down | -1.7694998 | LOC100043257  | 100043257 | PREDICTED: Mus musculus similar to RNA binding motif protein 3 (LOC100043257), mRNA.                                                                       |
| 4900519 | 0.020921338 | down | -1.7711748 | Sgk1          | 20393     | Mus musculus serum/glucocorticoid regulated kinase 1 (Sgk1), mRNA.                                                                                         |
| 4220468 | 0.020921338 | down | -1.773515  | Hnrnpa2b1     | 53379     | Mus musculus heterogeneous nuclear ribonucleoprotein A2/B1 (Hnrnpa2b1), transcript variant 2, mRNA.                                                        |
| 4390538 | 0.020921338 | down | -1.7754467 | Itm2a         | 16431     | Mus musculus integral membrane protein 2A (Itm2a), mRNA.                                                                                                   |
| 7040181 | 0.020921338 | down | -1.7854435 | 2410008K03Rik | 71962     | Mus musculus RIKEN cDNA 2410008K03 gene (2410008K03Rik), mRNA.                                                                                             |
| 7320743 | 0.020921338 | down | -1.788399  | Dctn4         |           |                                                                                                                                                            |
| 7210059 | 0.020921338 | down | -1.7941946 | Ing3          | 71777     | Mus musculus inhibitor of growth family, member 3 (Ing3), mRNA.                                                                                            |
| 6560543 | 0.020921338 | down | -1.7998435 | Lypla1        | 18777     | Mus musculus lysophospholipase 1 (Lypla1), mRNA.                                                                                                           |
| 4260722 | 0.020921338 | down | -1.8025854 | Use1          | 67023     | Mus musculus unconventional SNARE in the ER 1 homolog (S. cerevisiae) (Use1), transcript variant 1, mRNA.                                                  |
| 1690091 | 0.020921338 | down | -1.8102225 | Vim           | 22352     | Mus musculus vimentin (Vim), mRNA.                                                                                                                         |
| 290341  | 0.04330814  | down | -1.8172652 | Rasl11b       | 68939     | Mus musculus RAS-like, family 11, member B (Rasl11b), mRNA.                                                                                                |
| 3310424 | 0.020921338 | down | -1.8181071 | Acaa2         | 52538     | Mus musculus acetyl-Coenzyme A acyltransferase 2 (mitochondrial 3-oxoacyl-Coenzyme A thiolase) (Acaa2), nuclear gene encoding mitochondrial protein, mRNA. |
| 5090414 | 0.020921338 | down | -1.8216181 | Acaa2         |           |                                                                                                                                                            |
| 1400468 | 0.020921338 | down | -1.830839  | Surf4         | 20932     | Mus musculus surfait gene 4 (Surf4), mRNA.                                                                                                                 |
| 4010088 | 0.020921338 | down | -1.8718065 | Med10         | 28077     | Mus musculus mediator of RNA polymerase II transcription, subunit 10 homolog (NUT2, S. cerevisiae) (Med10), mRNA.                                          |
| 2850092 | 0.020921338 | down | -1.8809305 | Ilfng         | 15978     | Mus musculus interferon gamma (Ilfng), mRNA.                                                                                                               |

|         |             |      |            |               |        |                                                                                                          |
|---------|-------------|------|------------|---------------|--------|----------------------------------------------------------------------------------------------------------|
| 5860435 | 0.04330814  | down | -1.8816423 | H2-Ab1        | 14961  | Mus musculus histocompatibility 2, class II antigen A, beta 1 (H2-Ab1), mRNA.                            |
| 3180019 | 0.04330814  | down | -1.9137917 | Gng2          | 14702  | Mus musculus guanine nucleotide binding protein (G protein), gamma 2 (Gng2), transcript variant 2, mRNA. |
| 520563  | 0.020921338 | down | -1.9166282 | Snf1lk        | 17691  | Mus musculus SNF1-like kinase (Snf1lk), mRNA.                                                            |
| 10176   | 0.020921338 | down | -1.9238943 | Dusp4         | 319520 | Mus musculus dual specificity phosphatase 4 (Dusp4), mRNA.                                               |
| 3370008 | 0.020921338 | down | -1.9242152 | Ati3          | 109168 | Mus musculus atlastin GTPase 3 (Ati3), mRNA.                                                             |
| 2970408 | 0.020921338 | down | -1.9334537 | Hnrnpk        | 15387  | Mus musculus heterogeneous nuclear ribonucleoprotein K (Hnrnpk), mRNA.                                   |
| 4060471 | 0.020921338 | down | -1.9413472 | Sfrs5         | 20384  | Mus musculus splicing factor, arginine/serine-rich 5 (SRp40, HRS) (Sfrs5), transcript variant 1, mRNA.   |
| 2480577 | 0.04330814  | down | -1.9459862 | Actb          | 11461  | Mus musculus actin, beta, cytoplasmic (Actb), mRNA.                                                      |
| 150372  | 0.04330814  | down | -1.9467108 | Rasl11b       | 68939  | Mus musculus RAS-like, family 11, member B (Rasl11b), mRNA.                                              |
| 4010398 | 0.020921338 | down | -1.9532367 | Acaa2         |        |                                                                                                          |
| 2100278 | 0.020921338 | down | -1.9558758 | Plk2          | 20620  | Mus musculus polo-like kinase 2 (Drosophila) (Plk2), mRNA.                                               |
| 3180152 | 0.020921338 | down | -1.9559232 | Pqlc3         | 217430 | Mus musculus PQ loop repeat containing (Pqlc3), mRNA.                                                    |
| 7160762 | 0.020921338 | down | -1.9623272 | Hnrnpf        | 98758  | Mus musculus heterogeneous nuclear ribonucleoprotein F (Hnrnpf), mRNA.                                   |
| 4830072 | 0.020921338 | down | -1.9694366 | Rgs1          | 50778  | Mus musculus regulator of G-protein signaling 1 (Rgs1), mRNA.                                            |
| 5360685 | 0.04330814  | down | -1.9758024 | Igfbp7        | 29817  | Mus musculus insulin-like growth factor binding protein 7 (Igfbp7), mRNA.                                |
| 3170717 | 0.020921338 | down | -1.9869273 | Dnajb6        | 23950  | Mus musculus DnaJ (Hsp40) homolog, subfamily B, member 6 (Dnajb6), transcript variant 2, mRNA.           |
| 4230563 | 0.020921338 | down | -1.9885963 | Eif5a         | 276770 | Mus musculus eukaryotic translation initiation factor 5A (Eif5a), mRNA.                                  |
| 290307  | 0.020921338 | down | -1.9916445 | EG434858      | 434858 | Mus musculus predicted gene, EG434858 (EG434858), non-coding RNA.                                        |
| 3850398 | 0.020921338 | down | -2.0221715 | Hsd11b1       | 15483  | Mus musculus hydroxysteroid 11-beta dehydrogenase 1 (Hsd11b1), transcript variant 1, mRNA.               |
| 10309   | 0.020921338 | down | -2.053633  | Insig1        | 231070 | Mus musculus insulin induced gene 1 (Insig1), mRNA.                                                      |
| 5820292 | 0.020921338 | down | -2.0612707 | Vps37b        | 330192 | Mus musculus vacuolar protein sorting 37B (yeast) (Vps37b), mRNA.                                        |
| 4810358 | 0.04330814  | down | -2.0648258 | Tsc22d3       | 14605  | Mus musculus TSC22 domain family, member 3 (Tsc22d3), transcript variant 2, mRNA.                        |
| 7160603 | 0.020921338 | down | -2.0710764 | Sepp1         | 20363  | Mus musculus selenoprotein P, plasma, 1 (Sepp1), transcript variant 1, mRNA.                             |
| 6960196 | 0.020921338 | down | -2.0965202 | Klf6          | 23849  | Mus musculus Kruppel-like factor 6 (Klf6), mRNA.                                                         |
| 1090100 | 0.020921338 | down | -2.1154964 | Tgif1         | 21815  | Mus musculus TGF-beta-induced factor homeobox 1 (Tgif1), mRNA.                                           |
| 4880360 | 0.020921338 | down | -2.158125  | Lmna          | 16905  | Mus musculus lamin A (Lmna), transcript variant 2, mRNA.                                                 |
| 1710500 | 0.020921338 | down | -2.1875823 | Arcp5         | 67771  | Mus musculus actin related protein 2/3 complex, subunit 5 (Arcp5), mRNA.                                 |
| 3170689 | 0.020921338 | down | -2.20653   | Axud1         | 215418 | Mus musculus AXIN1 up-regulated 1 (Axud1), mRNA.                                                         |
| 5700168 | 0.020921338 | down | -2.222699  | Vamp3         | 22319  | Mus musculus vesicle-associated membrane protein 3 (Vamp3), mRNA.                                        |
| 3400747 | 0.020921338 | down | -2.2257211 | Igfbp4        | 16010  | Mus musculus insulin-like growth factor binding protein 4 (Igfbp4), mRNA.                                |
| 2900373 | 0.020921338 | down | -2.2876365 | 1190002H23Rik | 66214  | Mus musculus RIKEN cDNA 1190002H23 gene (1190002H23Rik), mRNA.                                           |
| 1990373 | 0.020921338 | down | -2.4053397 | Areg          | 11839  | Mus musculus amphiregulin (Areg), mRNA.                                                                  |
| 2480692 | 0.020921338 | down | -2.4313917 | Atf4          | 11911  | Mus musculus activating transcription factor 4 (Atf4), mRNA.                                             |
| 2900224 | 0.020921338 | down | -2.5466006 | Ddx5          | 13207  | Mus musculus DEAD (Asp-Glu-Ala-Asp) box polypeptide 5 (Ddx5), mRNA.                                      |
| 4830047 | 0.020921338 | down | -2.6209602 | Coq10b        | 67876  | Mus musculus coenzyme Q10 homolog B (S. cerevisiae) (Coq10b), transcript variant 1, mRNA.                |
| 1260632 | 0.020921338 | down | -2.668557  | Il10          | 16153  | Mus musculus interleukin 10 (Il10), mRNA.                                                                |
| 1440307 | 0.020921338 | down | -2.695619  | H2-Ab1        | 14961  | Mus musculus histocompatibility 2, class II antigen A, beta 1 (H2-Ab1), mRNA.                            |
| 2680722 | 0.04330814  | down | -3.785706  | Actb          | 11461  | Mus musculus actin, beta (Actb), mRNA.                                                                   |
| 780386  | 0.020921338 | down | -4.1056685 | Actb          | 11461  | Mus musculus actin, beta, cytoplasmic (Actb), mRNA.                                                      |
